# Supplementary material for: Transcriptomics Changes in the Peritoneum of Mice with Lipopolysaccharide-Induced Peritonitis
Source: Int J Mol Sci. 2021 Nov 30;22(23):13008. doi: 10.3390/ijms222313008 (PMC8657704; doi:10.3390/ijms222313008)
Supplement: Supplementary file 1 [file ijms-22-13008-s001.zip]

Archive with 24 entries (24 files):
- ijms-1473149-supplementary/Supplementary_10_Table S9. Details of DEGs-lincRNA (TAK vs. LPS).pdf
- ijms-1473149-supplementary/Supplementary_11_Table S10. Details of DEGs-miRNA genes (LPS vs. Ctrl).pdf
- ijms-1473149-supplementary/Supplementary_12_Table S11. Details of DEGs-antisense genes (LPS vs. Ctrl).pdf
- ijms-1473149-supplementary/Supplementary_13_Table S12. KEGG enrichment pathways of down-regulated DEGs (LPS vs. Control).pdf
- ijms-1473149-supplementary/Supplementary_14_Table S13. KEGG enrichment pathways of up-regulated DEGs (LPS vs. Control).pdf
- ijms-1473149-supplementary/Supplementary_15_Table S14. KEGG enrichment pathways of down-regulated DEGs (TAK vs. LPS).pdf
- ijms-1473149-supplementary/Supplementary_16_Table S15. Transcriptional factors predicted from the down-regulated DEGs (LPS vs. Control).pdf
- ijms-1473149-supplementary/Supplementary_17_Table S16. Transcriptional factors predicted from the up-regulated DEGs (TAK vs. LPS).pdf
- ijms-1473149-supplementary/Supplementary_18_Table S17. Hub Genes Information.pdf
- ijms-1473149-supplementary/Supplementary_19_Table S18. GO Analysis of Hub Genes.pdf
- ijms-1473149-supplementary/Supplementary_2_Table S1. Details of DEGs-protein_coding genes (LPS vs. Ctrl).pdf
- ijms-1473149-supplementary/Supplementary_20_Table S19. Protein modeling templates.pdf
- ijms-1473149-supplementary/Supplementary_21_Table S20. Ramachandran plot of hub proteins.pdf
- ijms-1473149-supplementary/Supplementary_22_Table S21. Primers for qPCR.pdf
- ijms-1473149-supplementary/Supplementary_23_Table S22 RMSD-RMSF-Rg.pdf
- ijms-1473149-supplementary/Supplementary_3_Table S2. Details of DEGs-protein_coding genes (TAK vs. LPS).pdf
- ijms-1473149-supplementary/Supplementary_4_Table S3. Details of DEGs-promoter_lncRNA genes (LPS vs. Ctrl).pdf
- ijms-1473149-supplementary/Supplementary_5_Table S4. Details of DEGs-pseudogene genes (LPS vs. Ctrl).pdf
- ijms-1473149-supplementary/Supplementary_6_Table S5. Details of DEGs-pseudogene genes (TAK vs. LPS).pdf
- ijms-1473149-supplementary/Supplementary_7_Table S6. Details of DEGs-processed_transcript genes (LPS vs. Ctrl).pdf
- ijms-1473149-supplementary/Supplementary_8_Table S7. Details of DEGs-processed_transcript genes (TAK vs. LPS).pdf
- ijms-1473149-supplementary/Supplementary_9_Table S8. Details of DEGs-lincRNA genes (LPS vs. Ctrl).pdf
- ijms-1473149-supplementary/Supplementary_file.pdf
- ijms-1473149-supplementary/Supplementary_S1 DEGs_all.xlsx
