# Supplementary material for: Transcriptomics Changes in the Peritoneum of Mice with Lipopolysaccharide-Induced Peritonitis
Source: Int J Mol Sci. 2021 Nov 30;22(23):13008. doi: 10.3390/ijms222313008 (PMC8657704; doi:10.3390/ijms222313008)
Supplement: Supplementary file 1 [file ijms-22-13008-s001.zip › ijms-1473149-supplementary/Supplementary_2_Table S1. Details of DEGs-protein_coding genes (LPS vs. Ctrl).pdf]

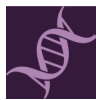

**Table S1.** Details of DEGs-protein\_coding genes (LPS vs. Ctrl)

| Gene_symbol          | log2FoldChange | Padj        | Gene_chromosome | Change |
|----------------------|----------------|-------------|-----------------|--------|
| <i>Diras2</i>        | -7.227158938   | 8.68E-15    | 13              | Down   |
| <i>Slc26a3</i>       | -6.817309891   | 2.38E-09    | 12              | Down   |
| <i>Ssu2</i>          | -6.521561652   | 1.03E-10    | 6               | Down   |
| <i>Mup20</i>         | -6.490688125   | 0.000800266 | 4               | Down   |
| <i>Lrrc31</i>        | -6.455008731   | 1.26E-06    | 3               | Down   |
| <i>Cdk15</i>         | -6.409764656   | 1.29E-10    | 1               | Down   |
| <i>Abcg8</i>         | -6.403276061   | 6.38E-07    | 17              | Down   |
| <i>Pck1</i>          | -6.376271511   | 1.03E-78    | 2               | Down   |
| <i>Nat8f7</i>        | -6.225040769   | 1.99E-09    | 6               | Down   |
| <i>Necab3</i>        | -6.190565407   | 3.73E-11    | 2               | Down   |
| <i>2810459M11Rik</i> | -6.051087061   | 2.32E-08    | 1               | Down   |
| <i>Slc16a5</i>       | -6.010049261   | 2.04E-08    | 11              | Down   |
| <i>Aass</i>          | -5.787626955   | 1.09E-08    | 6               | Down   |
| <i>Ccdc27</i>        | -5.741419833   | 1.14E-09    | 4               | Down   |
| <i>Btbd17</i>        | -5.682975397   | 1.73E-08    | 11              | Down   |
| <i>Rnf112</i>        | -5.636118987   | 3.21E-16    | 11              | Down   |
| <i>Skint3</i>        | -5.633149386   | 1.10E-11    | 4               | Down   |
| <i>Hcar1</i>         | -5.533768487   | 9.97E-41    | 5               | Down   |
| <i>Ptchd3</i>        | -5.531312005   | 2.21E-05    | 11              | Down   |
| <i>Foxq1</i>         | -5.446658562   | 2.51E-06    | 13              | Down   |
| <i>Odf3b</i>         | -5.432574747   | 3.61E-07    | 15              | Down   |
| <i>Sprn</i>          | -5.404707949   | 9.26E-09    | 7               | Down   |
| <i>Grb7</i>          | -5.37645893    | 4.95E-06    | 11              | Down   |
| <i>Abcg5</i>         | -5.369287498   | 3.52E-06    | 17              | Down   |
| <i>Sez6</i>          | -5.228425899   | 0.000163561 | 11              | Down   |
| <i>Sertad4</i>       | -5.227677872   | 2.33E-38    | 1               | Down   |
| <i>Gpr165</i>        | -5.206991954   | 3.31E-06    | X               | Down   |
| <i>Fam198a</i>       | -5.185852842   | 1.92E-23    | 9               | Down   |
| <i>Kcnb2</i>         | -5.174676088   | 0.001095007 | 1               | Down   |
| <i>Abcc6</i>         | -5.116486167   | 3.20E-05    | 7               | Down   |
| <i>Il1a</i>          | 8.782095807    | 5.25E-20    | 2               | Up     |
| <i>Mt2</i>           | 8.660370182    | 3.77E-180   | 8               | Up     |
| <i>Slamf1</i>        | 8.634856178    | 2.55E-50    | 1               | Up     |
| <i>Saa1</i>          | 8.437687757    | 2.07E-240   | 7               | Up     |
| <i>Stfa2</i>         | 8.313215192    | 9.68E-14    | 16              | Up     |
| <i>Slfn4</i>         | 8.275767349    | 2.38E-210   | 11              | Up     |
| <i>Prokr2</i>        | 8.247548334    | 4.00E-14    | 2               | Up     |
| <i>Lrfr5</i>         | 8.114025053    | 3.60E-08    | 12              | Up     |
| <i>Ccl5</i>          | 8.084876655    | 4.78E-103   | 11              | Up     |
| <i>Cxcl9</i>         | 7.984207178    | 2.08E-181   | 5               | Up     |
| <i>Sh2d5</i>         | 7.91000168     | 4.60E-72    | 4               | Up     |
| <i>Adamts4</i>       | 7.874385672    | 5.87E-62    | 1               | Up     |
| <i>Rnd1</i>          | 7.696790648    | 2.54E-133   | 15              | Up     |

|                      |             |             |    |    |
|----------------------|-------------|-------------|----|----|
| <i>Gm15056</i>       | 7.695134836 | 1.20E-16    | 8  | Up |
| <i>Ccl19</i>         | 7.660939596 | 0.007795487 | 4  | Up |
| <i>Ptx3</i>          | 7.540516519 | 5.74E-212   | 3  | Up |
| <i>Gm5483</i>        | 7.484771148 | 1.75E-16    | 16 | Up |
| <i>Clec4e</i>        | 7.473971526 | 2.01E-80    | 6  | Up |
| <i>AA467197</i>      | 7.421360496 | 1.07E-138   | 2  | Up |
| <i>Trem1</i>         | 7.420841235 | 1.02E-14    | 17 | Up |
| <i>Olf56</i>         | 7.408139809 | 3.97E-61    | 11 | Up |
| <i>Gzmb</i>          | 7.400785993 | 7.11E-33    | 14 | Up |
| <i>Ido1</i>          | 7.37401006  | 4.05E-54    | 8  | Up |
| <i>Rsd2</i>          | 7.336874961 | 4.62E-102   | 12 | Up |
| <i>4930438A08Rik</i> | 7.304215903 | 3.28E-14    | 11 | Up |
| <i>Dnmt3c</i>        | 7.30317473  | 3.94E-11    | 2  | Up |
| <i>Il1f9</i>         | 7.272300908 | 4.04E-14    | 2  | Up |
| <i>Ccl2</i>          | 7.264600645 | 1.20E-140   | 11 | Up |
| <i>Stfa3</i>         | 7.261733834 | 1.18E-16    | 16 | Up |
| <i>Serpina3i</i>     | 7.244338562 | 8.60E-59    | 12 | Up |

Note: down-regulated and up-regulated 30 protein-coding genes were demonstrated.
