# Supplementary material for: Transcriptomics Changes in the Peritoneum of Mice with Lipopolysaccharide-Induced Peritonitis
Source: Int J Mol Sci. 2021 Nov 30;22(23):13008. doi: 10.3390/ijms222313008 (PMC8657704; doi:10.3390/ijms222313008)
Supplement: Supplementary file 1 [file ijms-22-13008-s001.zip › ijms-1473149-supplementary/Supplementary_3_Table S2. Details of DEGs-protein_coding genes (TAK vs. LPS).pdf]

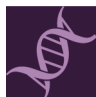

**Table S2.** Details of DEGs-protein\_coding genes (TAK vs. LPS)

| Gene_symbol           | log2FoldChange | Padj        | Gene_chromosome | Change |
|-----------------------|----------------|-------------|-----------------|--------|
| <i>Sele</i>           | -2.480305674   | 0.049100611 | 1               | Down   |
| <i>9930111J21Rik2</i> | -2.442979149   | 0.049100611 | 11              | Down   |
| <i>Gzmb</i>           | -2.324252647   | 0.006178091 | 14              | Down   |
| <i>Lpar3</i>          | -2.014707545   | 0.047550023 | 3               | Down   |
| <i>Nr4a3</i>          | -1.544222339   | 0.049100611 | 4               | Down   |
| <i>St6gal1</i>        | -1.453749932   | 0.049100611 | 16              | Down   |
| <i>Pkn3</i>           | 3.281765542    | 0.032118609 | 2               | Up     |
| <i>Plxdc1</i>         | 3.039222087    | 0.040508588 | 11              | Up     |
| <i>Gm12689</i>        | 3.019761304    | 0.049100611 | 4               | Up     |
| <i>Higd1b</i>         | 2.212102654    | 0.041390252 | 11              | Up     |
| <i>Plekhh3</i>        | 2.173246157    | 0.047550023 | 11              | Up     |
| <i>Card10</i>         | 2.081192293    | 0.049100611 | 15              | Up     |
| <i>Cbx6</i>           | 1.949752092    | 0.004062808 | 15              | Up     |
| <i>Gstt3</i>          | 1.87286013     | 0.049100611 | 10              | Up     |
| <i>mt-Nd3</i>         | 1.868936208    | 0.049100611 | MT              | Up     |
| <i>Rbm12b1</i>        | 1.362563897    | 0.004157553 | 4               | Up     |
| <i>Ddit3</i>          | 1.060271348    | 0.049100611 | 10              | Up     |

Note: down-regulated and up-regulated protein-coding genes were demonstrated.
