# Supplementary material for: Transcriptomics Changes in the Peritoneum of Mice with Lipopolysaccharide-Induced Peritonitis
Source: Int J Mol Sci. 2021 Nov 30;22(23):13008. doi: 10.3390/ijms222313008 (PMC8657704; doi:10.3390/ijms222313008)
Supplement: Supplementary file 1 [file ijms-22-13008-s001.zip › ijms-1473149-supplementary/Supplementary_4_Table S3. Details of DEGs-promoter_lncRNA genes (LPS vs. Ctrl).pdf]

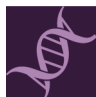

**Table S3.** Details of DEGs-promoter\_lncRNA genes (LPS vs. Ctrl)

| Gene_symbol          | log2FoldChange | Padj        | Gene_chromosome | Change |
|----------------------|----------------|-------------|-----------------|--------|
| <i>Gm10614</i>       | -3.65283242    | 0.021667045 | 8               | Down   |
| <i>Dio3os</i>        | -3.182353352   | 9.20E-08    | 12              | Down   |
| <i>Gm10101</i>       | -2.222286142   | 0.041938124 | 14              | Down   |
| <i>Gm20684</i>       | -2.077536216   | 0.004478741 | 7               | Down   |
| <i>Gm26684</i>       | -2.033512179   | 0.001023381 | 15              | Down   |
| <i>B230354K17Rik</i> | -1.792497952   | 5.82E-15    | 17              | Down   |
| <i>9330162012Rik</i> | -1.735574655   | 0.000517791 | 13              | Down   |
| <i>Gm48768</i>       | -1.583498759   | 1.83E-05    | 10              | Down   |
| <i>Gm5144</i>        | -1.414598651   | 0.027253129 | 15              | Down   |
| <i>9530018F02Rik</i> | -1.229569045   | 0.013593777 | 12              | Down   |
| <i>BC048644</i>      | 4.314735766    | 0.022372629 | 8               | Up     |
| <i>E230013L22Rik</i> | 3.683997295    | 9.95E-23    | 8               | Up     |
| <i>Gm45418</i>       | 2.815829385    | 0.000612766 | 8               | Up     |
| <i>Gm16675</i>       | 2.766108993    | 8.62E-13    | 8               | Up     |
| <i>D430020J02Rik</i> | 2.077847252    | 0.001131056 | 12              | Up     |
| <i>4933412E12Rik</i> | 1.880429223    | 6.73E-13    | 10              | Up     |
| <i>Haglr</i>         | 1.750425984    | 0.004844512 | 2               | Up     |
| <i>Gm26839</i>       | 1.533171542    | 0.035142113 | 12              | Up     |
| <i>2310014F06Rik</i> | 1.265258073    | 1.86E-07    | 7               | Up     |
