# Supplementary material for: Transcriptomics Changes in the Peritoneum of Mice with Lipopolysaccharide-Induced Peritonitis
Source: Int J Mol Sci. 2021 Nov 30;22(23):13008. doi: 10.3390/ijms222313008 (PMC8657704; doi:10.3390/ijms222313008)
Supplement: Supplementary file 1 [file ijms-22-13008-s001.zip › ijms-1473149-supplementary/Supplementary_5_Table S4. Details of DEGs-pseudogene genes (LPS vs. Ctrl).pdf]

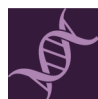

**Table S4.** Details of DEGs-pseudogene genes (LPS vs. Ctrl)

| Gene_symbol          | log2FoldChange | Padj        | Gene_chromosome | Change |
|----------------------|----------------|-------------|-----------------|--------|
| <i>Hmgb1-ps8</i>     | -6.041328811   | 8.25E-10    | 10              | Down   |
| <i>Gm21013</i>       | -5.30528402    | 5.10E-06    | 9               | Down   |
| <i>Alms1-ps1</i>     | -4.577788833   | 2.07E-05    | 6               | Down   |
| <i>Adh6-ps1</i>      | -4.22846595    | 0.002430004 | 3               | Down   |
| <i>Mrgprb11-ps</i>   | -4.147725344   | 9.01E-05    | 7               | Down   |
| <i>Nxpe1-ps</i>      | -4.094886957   | 1.70E-05    | 9               | Down   |
| <i>Gm8097</i>        | -3.957692624   | 0.014557895 | X               | Down   |
| <i>Gm26956</i>       | -3.852471539   | 0.041030197 | 13              | Down   |
| <i>Gm47062</i>       | -3.759874803   | 0.016417816 | 9               | Down   |
| <i>BC064078</i>      | -3.457558325   | 3.17E-12    | 6               | Down   |
| <i>Gm17229</i>       | -3.384970565   | 0.007912595 | 10              | Down   |
| <i>Alms1-ps2</i>     | -3.165682875   | 0.024407118 | 6               | Down   |
| <i>Gm5454</i>        | -3.022705584   | 5.05E-05    | 13              | Down   |
| <i>Gm47099</i>       | -2.94318294    | 0.036761143 | 10              | Down   |
| <i>Gm7117</i>        | -2.858351905   | 0.000129616 | X               | Down   |
| <i>Gm3325</i>        | -2.855948576   | 9.65E-05    | 13              | Down   |
| <i>Rpl19-ps3</i>     | -2.826345172   | 0.025735582 | 14              | Down   |
| <i>Gm4804</i>        | -2.794321434   | 0.041900244 | 12              | Down   |
| <i>Gm13688</i>       | -2.755438112   | 0.000767593 | 2               | Down   |
| <i>Gm5575</i>        | -2.74210821    | 0.002818996 | 5               | Down   |
| <i>Cyp4f41-ps</i>    | -2.629797751   | 0.033053879 | 17              | Down   |
| <i>Rpl26-ps6</i>     | -2.611828117   | 0.010009791 | 9               | Down   |
| <i>Gm49331</i>       | -2.574834268   | 4.90E-10    | 12              | Down   |
| <i>Gm9387</i>        | -2.552258842   | 0.027028778 | 3               | Down   |
| <i>Gm15422</i>       | -2.549482722   | 0.009403966 | 14              | Down   |
| <i>Gm6723</i>        | -2.51628411    | 0.030476641 | 15              | Down   |
| <i>Gpr137b-ps</i>    | -2.384015129   | 3.57E-27    | 13              | Down   |
| <i>Zkscan7</i>       | -2.359435156   | 8.84E-05    | 9               | Down   |
| <i>Gm36298</i>       | -2.341998847   | 1.04E-07    | 13              | Down   |
| <i>Gm7240</i>        | -2.311202989   | 2.46E-05    | 13              | Down   |
| <i>AC159187.1</i>    | 8.454911655    | 4.51E-19    | 17              | Up     |
| <i>Cxcl11</i>        | 7.708606602    | 7.27E-57    | 5               | Up     |
| <i>Gm5970</i>        | 7.121312845    | 4.30E-53    | 18              | Up     |
| <i>B230303A05Rik</i> | 6.143601795    | 1.76E-08    | 13              | Up     |
| <i>Mx2</i>           | 6.023557746    | 3.10E-91    | 16              | Up     |
| <i>I830127L07Rik</i> | 5.854147176    | 1.42E-09    | 15              | Up     |
| <i>Gm18445</i>       | 5.795681939    | 2.35E-21    | 1               | Up     |
| <i>CT025731.2</i>    | 5.791769206    | 2.81E-08    | 17              | Up     |
| <i>Gm12250</i>       | 5.749528679    | 3.43E-44    | 11              | Up     |
| <i>Ccl19-ps3</i>     | 5.615045362    | 1.31E-10    | 4               | Up     |
| <i>Gm6524</i>        | 5.473606307    | 3.81E-06    | 8               | Up     |
| <i>Serpina3h</i>     | 5.34676281     | 1.95E-35    | 12              | Up     |

|                   |             |             |    |    |
|-------------------|-------------|-------------|----|----|
| <i>Gm8818</i>     | 5.231636028 | 1.81E-11    | 1  | Up |
| <i>Gm5300</i>     | 5.079733204 | 0.000591239 | 6  | Up |
| <i>Gm4240</i>     | 4.907053932 | 7.00E-18    | 14 | Up |
| <i>Gm12407</i>    | 4.844237388 | 2.24E-23    | 4  | Up |
| <i>Gm18853</i>    | 4.842158327 | 1.34E-09    | 7  | Up |
| <i>Gm19121</i>    | 4.716212944 | 6.55E-05    | 9  | Up |
| <i>Gm6610</i>     | 4.609484729 | 0.000325266 | 15 | Up |
| <i>Gm18752</i>    | 4.586042844 | 8.20E-05    | 1  | Up |
| <i>Gbp11</i>      | 4.575594673 | 3.53E-29    | 5  | Up |
| <i>Gm18246</i>    | 4.554268479 | 0.005900806 | 12 | Up |
| <i>Gm6545</i>     | 4.515643273 | 5.89E-05    | 19 | Up |
| <i>Olf753-ps1</i> | 4.465132525 | 0.002422735 | 17 | Up |
| <i>Gm7582</i>     | 4.361514088 | 0.000640602 | 1  | Up |
| <i>Gm29747</i>    | 4.322534132 | 0.002654063 | 3  | Up |
| <i>Gm7115</i>     | 4.316128711 | 4.23E-06    | 3  | Up |
| <i>Gm45471</i>    | 4.297995055 | 0.007556784 | 7  | Up |
| <i>Rps8-ps3</i>   | 4.197622772 | 0.013260064 | 6  | Up |
| <i>Gm17083</i>    | 4.168379887 | 0.001659982 | 13 | Up |

Note: down-regulated and up-regulated 30 pseudogene genes were illustrated.
