# Supplementary material for: Transcriptomics Changes in the Peritoneum of Mice with Lipopolysaccharide-Induced Peritonitis
Source: Int J Mol Sci. 2021 Nov 30;22(23):13008. doi: 10.3390/ijms222313008 (PMC8657704; doi:10.3390/ijms222313008)
Supplement: Supplementary file 1 [file ijms-22-13008-s001.zip › ijms-1473149-supplementary/Supplementary_6_Table S5. Details of DEGs-pseudogene genes (TAK vs. LPS).pdf]

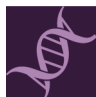

**Table S5.** Details of DEGs-pseudogene genes (TAK vs. LPS)

| Gene_symbol       | log2FoldChange | Padj        | Gene_chromosome | Change |
|-------------------|----------------|-------------|-----------------|--------|
| <i>AC159187.1</i> | -3.169815194   | 0.001288365 | 17              | Down   |
| <i>Gm10156</i>    | -1.399059132   | 0.002684679 | 7               | Down   |
