# Supplementary material for: Transcriptomics Changes in the Peritoneum of Mice with Lipopolysaccharide-Induced Peritonitis
Source: Int J Mol Sci. 2021 Nov 30;22(23):13008. doi: 10.3390/ijms222313008 (PMC8657704; doi:10.3390/ijms222313008)
Supplement: Supplementary file 1 [file ijms-22-13008-s001.zip › ijms-1473149-supplementary/Supplementary_7_Table S6. Details of DEGs-processed_transcript genes (LPS vs. Ctrl).pdf]

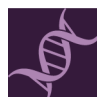

**Table S6.** Details of DEGs-processed\_transcript genes (LPS vs. Ctrl)

| Gene_symbol          | log2FoldChange | Padj        | Gene_chromosome | Change |
|----------------------|----------------|-------------|-----------------|--------|
| <i>A830012C17Rik</i> | -5.494889748   | 1.43E-07    | 4               | Down   |
| <i>Gm10790</i>       | -5.344628148   | 3.38E-07    | 13              | Down   |
| <i>2900041M22Rik</i> | -4.662208239   | 3.15E-23    | 11              | Down   |
| <i>4930447K03Rik</i> | -4.116624326   | 0.026319463 | 13              | Down   |
| <i>E330020D12Rik</i> | -4.085889148   | 0.002109298 | 1               | Down   |
| <i>Stamos</i>        | -3.774444065   | 0.000374721 | 2               | Down   |
| <i>Gm48693</i>       | -3.686738909   | 0.036733667 | 12              | Down   |
| <i>Gm44597</i>       | -3.658616854   | 0.010958169 | 6               | Down   |
| <i>Gm28417</i>       | -3.589523648   | 0.001205842 | 1               | Down   |
| <i>Gm12409</i>       | -3.541358122   | 0.042572093 | 4               | Down   |
| <i>Gm11748</i>       | -3.491123361   | 0.012803227 | 11              | Down   |
| <i>E230016K23Rik</i> | -3.410766264   | 4.08E-09    | 11              | Down   |
| <i>Hoxa11os</i>      | -3.240255997   | 0.005533673 | 6               | Down   |
| <i>9130017K11Rik</i> | -3.09447008    | 0.029266441 | 11              | Down   |
| <i>B130024G19Rik</i> | -2.986236206   | 2.42E-05    | 7               | Down   |
| <i>2010001K21Rik</i> | -2.947965053   | 0.000888262 | 13              | Down   |
| <i>Gm14207</i>       | -2.854684802   | 2.44E-06    | 2               | Down   |
| <i>3010001F23Rik</i> | -2.854373827   | 0.024754894 | X               | Down   |
| <i>Ptprv</i>         | -2.851399035   | 0.01317413  | 1               | Down   |
| <i>Trerf1</i>        | -2.812112011   | 7.74E-21    | 17              | Down   |
| <i>Gm20492</i>       | -2.793731935   | 0.013565711 | 10              | Down   |
| <i>Gm20743</i>       | -2.785360434   | 6.70E-10    | 1               | Down   |
| <i>Gm16244</i>       | -2.773621202   | 0.020023542 | 19              | Down   |
| <i>BC028777</i>      | -2.700196334   | 0.035627523 | 17              | Down   |
| <i>Gm10044</i>       | -2.660165142   | 0.01226064  | 14              | Down   |
| <i>Gm34121</i>       | -2.622806873   | 0.01731764  | 7               | Down   |
| <i>Gm6556</i>        | -2.588659775   | 0.012562106 | 13              | Down   |
| <i>2010016I18Rik</i> | -2.474720755   | 0.000525629 | 3               | Down   |
| <i>Foxd2os</i>       | -2.400622612   | 1.00E-05    | 4               | Down   |
| <i>A930006K02Rik</i> | -2.268151381   | 0.001841466 | 16              | Down   |
| <i>1700011B04Rik</i> | 5.809288332    | 2.72E-08    | 13              | Up     |
| <i>Gm12339</i>       | 4.873362917    | 0.0010318   | 11              | Up     |
| <i>Gm19744</i>       | 4.464919746    | 1.62E-05    | 8               | Up     |
| <i>AC154478.1</i>    | 4.032025145    | 2.10E-08    | 16              | Up     |
| <i>Gm14636</i>       | 3.995409809    | 0.000650841 | X               | Up     |
| <i>Gm12503</i>       | 3.491226347    | 0.030172497 | 4               | Up     |
| <i>Anxa13</i>        | 3.418415518    | 5.22E-06    | 15              | Up     |
| <i>Gm26672</i>       | 3.126307586    | 0.023690583 | 18              | Up     |
| <i>G530011O06Rik</i> | 2.985307527    | 8.97E-09    | X               | Up     |
| <i>Gm28496</i>       | 2.858597423    | 0.017838764 | 7               | Up     |
| <i>4931431B13Rik</i> | 2.716660535    | 0.006761584 | 7               | Up     |
| <i>Gm20470</i>       | 2.692481411    | 0.032389912 | 10              | Up     |

|                      |             |             |    |    |
|----------------------|-------------|-------------|----|----|
| <i>Gm20559</i>       | 2.52917493  | 2.04E-17    | 6  | Up |
| <i>AW047730</i>      | 2.279442314 | 0.044198316 | 3  | Up |
| <i>4930597O21Rik</i> | 2.224261549 | 0.019133588 | 6  | Up |
| <i>Gm16096</i>       | 2.195637479 | 0.000409774 | 9  | Up |
| <i>Gm43305</i>       | 2.186726372 | 1.15E-07    | 14 | Up |
| <i>C4a</i>           | 2.170682597 | 3.34E-06    | 17 | Up |
| <i>Gm15832</i>       | 2.041754693 | 7.50E-09    | 1  | Up |
| <i>2410006H16Rik</i> | 2.039786967 | 2.55E-20    | 11 | Up |
| <i>Snhg15</i>        | 2.027441339 | 3.56E-36    | 11 | Up |
| <i>9530080O11Rik</i> | 1.910473244 | 0.001176049 | 4  | Up |
| <i>Snhg17</i>        | 1.844571431 | 3.83E-21    | 2  | Up |
| <i>Snhg5</i>         | 1.831363478 | 4.70E-15    | 9  | Up |
| <i>Snhg1</i>         | 1.794337871 | 1.01E-22    | 19 | Up |
| <i>F830208F22Rik</i> | 1.788427737 | 0.000611371 | 18 | Up |
| <i>Gm15764</i>       | 1.641752121 | 0.014168194 | 16 | Up |
| <i>1700101I11Rik</i> | 1.574454516 | 0.000302766 | 6  | Up |
| <i>Gm17494</i>       | 1.563099677 | 0.048497313 | 3  | Up |
| <i>Dancr</i>         | 1.548971836 | 0.000184145 | 5  | Up |

Note: down-regulated and up-regulated 30 processed\_transcript genes were demonstrated.
