# Supplementary material for: Transcriptomics Changes in the Peritoneum of Mice with Lipopolysaccharide-Induced Peritonitis
Source: Int J Mol Sci. 2021 Nov 30;22(23):13008. doi: 10.3390/ijms222313008 (PMC8657704; doi:10.3390/ijms222313008)
Supplement: Supplementary file 1 [file ijms-22-13008-s001.zip › ijms-1473149-supplementary/Supplementary_8_Table S7. Details of DEGs-processed_transcript genes (TAK vs. LPS).pdf]

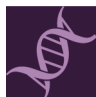

**Table S7.** Details of DEGs-processed\_transcript genes (TAK vs. LPS)

| Gene_symbol     | log2FoldChange | Padj        | Gene_chromosome | Change |
|-----------------|----------------|-------------|-----------------|--------|
| <i>Mir99ahg</i> | 2.05934764     | 0.032118609 | 16              | Up     |
| <i>Gm17066</i>  | 1.638658503    | 0.026443359 | 14              | Up     |
