# Supplementary material for: Transcriptomics Changes in the Peritoneum of Mice with Lipopolysaccharide-Induced Peritonitis
Source: Int J Mol Sci. 2021 Nov 30;22(23):13008. doi: 10.3390/ijms222313008 (PMC8657704; doi:10.3390/ijms222313008)
Supplement: Supplementary file 1 [file ijms-22-13008-s001.zip › ijms-1473149-supplementary/Supplementary_10_Table S9. Details of DEGs-lincRNA (TAK vs. LPS).pdf]

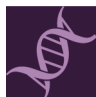

**Table S9.** Details of DEGs-lincRNA (TAK vs. LPS)

| Gene_symbol    | log2FoldChange | Padj        | Gene_chromosome | Change |
|----------------|----------------|-------------|-----------------|--------|
| <i>Gm49539</i> | 3.01685556     | 0.040316569 | 15              | Up     |
