# Supplementary material for: Transcriptomics Changes in the Peritoneum of Mice with Lipopolysaccharide-Induced Peritonitis
Source: Int J Mol Sci. 2021 Nov 30;22(23):13008. doi: 10.3390/ijms222313008 (PMC8657704; doi:10.3390/ijms222313008)
Supplement: Supplementary file 1 [file ijms-22-13008-s001.zip › ijms-1473149-supplementary/Supplementary_11_Table S10. Details of DEGs-miRNA genes (LPS vs. Ctrl).pdf]

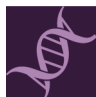

**Table S10.** Details of DEGs-miRNA genes (LPS vs. Ctrl)

| Gene_symbol      | log2FoldChange | Padj        | Gene_chromosome | Change |
|------------------|----------------|-------------|-----------------|--------|
| <i>Gm24084</i>   | -4.216698883   | 0.007277862 | 10              | Down   |
| <i>Mir196a-1</i> | -3.524444858   | 0.018465223 | 11              | Down   |
| <i>Mir6929</i>   | -3.399847395   | 0.006950872 | 11              | Down   |
| <i>Gm22991</i>   | -3.323259379   | 0.048348057 | 4               | Down   |
| <i>Mir3091</i>   | 4.471300483    | 0.016301898 | 2               | Up     |
| <i>Gm44340</i>   | 4.2355963      | 0.007140473 | 14              | Up     |
| <i>Snord43</i>   | 4.204019183    | 0.038263299 | 15              | Up     |
| <i>Gm25911</i>   | 3.981174504    | 5.71E-14    | 1               | Up     |
| <i>Gm24017</i>   | 3.550623839    | 0.00010253  | 13              | Up     |
| <i>Mir6386</i>   | 3.496899719    | 0.015770162 | 9               | Up     |
| <i>Gm27514</i>   | 2.89202697     | 0.002592878 | 6               | Up     |
| <i>Mir7678</i>   | 2.272326192    | 0.002359836 | 2               | Up     |
| <i>Mir1898</i>   | 2.20486487     | 0.013002107 | 15              | Up     |
| <i>Mir7-1</i>    | 1.65010275     | 0.000213484 | 13              | Up     |
