# Supplementary material for: Transcriptomics Changes in the Peritoneum of Mice with Lipopolysaccharide-Induced Peritonitis
Source: Int J Mol Sci. 2021 Nov 30;22(23):13008. doi: 10.3390/ijms222313008 (PMC8657704; doi:10.3390/ijms222313008)
Supplement: Supplementary file 1 [file ijms-22-13008-s001.zip › ijms-1473149-supplementary/Supplementary_12_Table S11. Details of DEGs-antisense genes (LPS vs. Ctrl).pdf]

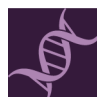

**Table S11.** Details of DEGs-antisense genes (LPS vs. Ctrl)

| Gene_symbol          | log2FoldChange | Padj        | Gene_chromosome | Change |
|----------------------|----------------|-------------|-----------------|--------|
| <i>B630019A10Rik</i> | -5.062036513   | 0.000510177 | 16              | Down   |
| <i>Gm12963</i>       | -5.053940861   | 2.94E-07    | 4               | Down   |
| <i>Kcnd3os</i>       | -5.035819698   | 4.15E-05    | 3               | Down   |
| <i>B430119L08Rik</i> | -4.817589499   | 1.68E-07    | 12              | Down   |
| <i>Gm13111</i>       | -4.733873261   | 6.85E-05    | 4               | Down   |
| <i>4933417O13Rik</i> | -4.680011015   | 0.000189867 | 7               | Down   |
| <i>Gm45449</i>       | -4.631372621   | 0.00089975  | 8               | Down   |
| <i>9530036M11Rik</i> | -4.543142343   | 4.98E-05    | 6               | Down   |
| <i>Gm13919</i>       | -4.381290958   | 0.000456952 | 2               | Down   |
| <i>Gm671</i>         | -4.252130865   | 0.000295912 | 15              | Down   |
| <i>Gm30270</i>       | -4.175550012   | 0.002018414 | 6               | Down   |
| <i>Gm17025</i>       | -4.109591842   | 0.000366515 | 15              | Down   |
| <i>Gm12426</i>       | -4.035209586   | 0.003038629 | 4               | Down   |
| <i>Gm11342</i>       | -4.023241356   | 0.032704175 | 13              | Down   |
| <i>Gm48495</i>       | -3.977477379   | 0.001021169 | 10              | Down   |
| <i>Gm4419</i>        | -3.909101063   | 0.002023171 | 12              | Down   |
| <i>Gm11767</i>       | -3.552910521   | 0.014548001 | 11              | Down   |
| <i>Gm12002</i>       | -3.499703234   | 2.20E-16    | 11              | Down   |
| <i>A530020G20Rik</i> | -3.357419415   | 1.23E-14    | 3               | Down   |
| <i>Sox5os4</i>       | -3.330881977   | 0.03273576  | 6               | Down   |
| <i>Gm30329</i>       | -3.305404983   | 0.007800475 | 8               | Down   |
| <i>Bloc1s6os</i>     | -3.233655168   | 0.031705121 | 2               | Down   |
| <i>Gm45447</i>       | -3.231022841   | 0.000856674 | 2               | Down   |
| <i>Chn1os3</i>       | -3.225886898   | 0.016711252 | 2               | Down   |
| <i>Gm28932</i>       | -3.220616953   | 0.010790775 | 14              | Down   |
| <i>A230107N01Rik</i> | -3.207934724   | 0.040609297 | 13              | Down   |
| <i>Gm10561</i>       | -3.159591053   | 1.27E-05    | 1               | Down   |
| <i>B430010I23Rik</i> | -3.079410097   | 1.36E-06    | 8               | Down   |
| <i>Gm14964</i>       | -3.05506457    | 6.31E-12    | 19              | Down   |
| <i>Gm12454</i>       | -3.027397493   | 0.005980354 | 4               | Down   |
| <i>Gm45774</i>       | 8.861796087    | 9.23E-42    | 8               | Up     |
| <i>Gm11738</i>       | 7.554591172    | 2.11E-14    | 11              | Up     |
| <i>A630012P03Rik</i> | 7.166987503    | 1.69E-09    | X               | Up     |
| <i>4930430E12Rik</i> | 7.007404235    | 7.68E-11    | 4               | Up     |
| <i>Gm16685</i>       | 6.134628324    | 4.11E-27    | 3               | Up     |
| <i>Gm29292</i>       | 5.828014128    | 3.22E-08    | 11              | Up     |
| <i>Gm12530</i>       | 5.392644388    | 6.28E-06    | 4               | Up     |
| <i>Gm47595</i>       | 5.378389245    | 1.54E-06    | 10              | Up     |
| <i>Gm15556</i>       | 5.268146447    | 7.83E-06    | 17              | Up     |
| <i>Gm44672</i>       | 5.027995094    | 6.82E-09    | 7               | Up     |
| <i>Gm12868</i>       | 4.737500788    | 0.000295006 | 4               | Up     |
| <i>1700025N23Rik</i> | 4.66592184     | 3.43E-08    | 6               | Up     |

---

|                      |             |             |    |    |
|----------------------|-------------|-------------|----|----|
| <i>Gm20496</i>       | 4.650021446 | 0.000217919 | 17 | Up |
| <i>1700071M16Rik</i> | 4.637553526 | 0.000130721 | 17 | Up |
| <i>Gm14236</i>       | 4.540800685 | 0.002326701 | 2  | Up |
| <i>Gm27040</i>       | 4.529016409 | 0.000386633 | 7  | Up |
| <i>Gm15731</i>       | 4.508144122 | 0.002136502 | 5  | Up |
| <i>Gm16015</i>       | 4.40863417  | 0.000324143 | 5  | Up |
| <i>Gm13822</i>       | 4.377428724 | 9.16E-21    | 5  | Up |
| <i>Gm42809</i>       | 4.374457278 | 1.40E-24    | 3  | Up |
| <i>AC127341.3</i>    | 4.257404136 | 1.31E-10    | 17 | Up |
| <i>Gm17173</i>       | 4.127266438 | 0.018647401 | 14 | Up |
| <i>Gm47118</i>       | 4.11414052  | 0.007954635 | 13 | Up |
| <i>Gm15943</i>       | 4.018130432 | 1.09E-25    | 15 | Up |
| <i>BC018473</i>      | 3.937895954 | 0.048788303 | 11 | Up |
| <i>Gm16098</i>       | 3.862464113 | 3.16E-05    | 2  | Up |
| <i>Gm20275</i>       | 3.829720408 | 0.02694002  | 9  | Up |
| <i>Gm11626</i>       | 3.750672028 | 0.017472883 | 11 | Up |
| <i>Gm44851</i>       | 3.627010143 | 0.021608123 | 7  | Up |
| <i>Gm17089</i>       | 3.564468914 | 0.000315954 | 6  | Up |

---

Note: down-regulated and up-regulated 30 antisense genes were displayed.
