# Supplementary material for: Transcriptomics Changes in the Peritoneum of Mice with Lipopolysaccharide-Induced Peritonitis
Source: Int J Mol Sci. 2021 Nov 30;22(23):13008. doi: 10.3390/ijms222313008 (PMC8657704; doi:10.3390/ijms222313008)
Supplement: Supplementary file 1 [file ijms-22-13008-s001.zip › ijms-1473149-supplementary/Supplementary_14_Table S13. KEGG enrichment pathways of up-regulated DEGs (LPS vs. Control).pdf]

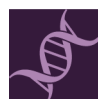

**Table S13.** KEGG enrichment pathways of up-regulated DEGs (LPS vs. Control)

| Pathway ID | Name     | Gene count                             | PValue | Genes    |
|------------|----------|----------------------------------------|--------|----------|
| 1          | mmu04060 | Cytokine-cytokine receptor interaction | 110    | 2.41E-07 |
| 2          | mmu05169 | Epstein-Barr virus infection           | 104    | 4.94E-12 |
| 3          | mmu05168 | Herpes simplex infection               | 96     | 4.94E-12 |

|   |          |                                         |    |             |                                                                                                                                                                                                                                                                                                                                                                                                                                                                                                                                                                                                                                                                |
|---|----------|-----------------------------------------|----|-------------|----------------------------------------------------------------------------------------------------------------------------------------------------------------------------------------------------------------------------------------------------------------------------------------------------------------------------------------------------------------------------------------------------------------------------------------------------------------------------------------------------------------------------------------------------------------------------------------------------------------------------------------------------------------|
|   |          |                                         |    |             | <i>ps, Il15, Srsf1, Eif2ak1, Fasl, Cul1, Ifnar2, Traf6, Eif2ak4, Crebbp, H2-Q2, Jun, Eef1d, Tab2, Ikbkb, Ppp1cc, Tnfsf14, Med8, H2-M9, Csnk2b, Cycs, Ifnar1, H2-T3</i>                                                                                                                                                                                                                                                                                                                                                                                                                                                                                         |
| 4 | mmu05166 | Human T-cell leukemia virus 1 infection | 91 | 0.019580468 | <i>Il6, Zfp36, Cdkn1a, Nfkb1a, Il15ra, Cd40, Slc2a1, Ets2, H2-Q4, Myc, Relb, Stat5a, Fosl1, Tnf, Il2rg, Nfkb2, H2-Q6, Icam1, Vcam1, Atf3, Smad3, Il1r1, Ranbp1, H2-Q7, H2-T22, Fos, Egr1, Rela, Csf2, Atf4, Bcl2l1, Slc25a5, H2-K1, Elk4, H2-M3, Ran, Pcnal, Il2ra, H2-T23, Chuk, Jak1, Nfkb1, Mybl2, Map2k4, Trp53inp1, Nfyb, Crtc2, Xbp1, Nras, Crem, Lck, Ets1, Il2rb, Tnfrsf1a, Adcy2, H2-T24, Bax, H2-D1, Ltbr, Trp53, Tspo, Kat5, H2-T-ps, Il15, Jak3, Ranbp3, Bub3, Spi1, Fzd4, Atf1, Pttg1, Anapc7, Itgb2l, Egr2, Pole4, E2f3, Crebbp, H2-Q2, Pdgfrb, Jun, Ikbkb, Tgfb2, H2-M9, Il1r2, Vdac2, Ppp3cc, Canx, Slc25a4, Pold2, Calr, H2-T3</i>            |
| 5 | mmu03013 | RNA transport                           | 86 | 4.94E-12    | <i>Seh1l, Eif5, Elac2, Nup93, Eif1a, Nmd3, Eif4a1, Ddx39b, Nup210, Eif3b, Rnps1, Eif4a3, Pop1, Eif2s1, Eif2b2, Eif3d, Ran, Eif4ebp1, Rangap1, Alyref, Eif4g2, Nup98, Nup62, Strap, Xpo5, Nup54, Eif4e2, Prmt5, Rbm8a, Thoc5, Rae1, Gm49336, Magoh, Ncbp1, Eif2s2, Senp2, Sec13, Thoc1, Eif2b3, Eif3c, Nup205, Eif2b1, Eif3g, Srrm1, Eif3e, Thoc3, Nupl2, Nup188, Pym1, Clns1a, Pabpc1, Eif3i, Magohb, Ube2i, Trnt1, Smn1, Eif4e, Eif3a, Pabpc1l, Eif4g3, Eif3j1, Gemin5, Rpp38, Tgs1, Casc3, Eif3j2, Eef1a2, Sap18b, Nup88, Nup210l, Eif1, Pom121, Nup153, Rpp40, Thoc6, Eif2s3y, Eif2s3x, Eif4g1, Nup50, Pnn, Sap18, Eif2b5, Ranbp2, Eif1ax, Rpp30, Kpnbl</i> |
| 6 | mmu05163 | Human cytomegalovirus infection         | 83 | 0.005404622 | <i>Il6, Ccl2, Cdkn1a, Ccl5, Tap1, Nfkb1a, Il1b, Fas, Ccl4, Ccl3, H2-Q4, Myc, Tbk1, Tnf, H2-Q6, Ccl12, Ptgs2, Stat3, Cxcr2, Il1r1, Tap2, H2-Q7, H2-T22, Gna13, Rela, Atf4, Gng12, Map2k1, Tapbp, H2-K1, H2-M3, Tmem173, B2m, Eif4ebp1, H2-T23, Chuk, Egrf, Jak1, Nfkb1, Cx3cl1, Nras, Ripk1, Rock2, Casp8, Bid, Tnfrsf1a, Adcy2, Traf2, Il10ra, H2-T24, Rac2, Gnb4, Rac1, Mb21d1, Ccr5, Bax, H2-D1, Trp53, Ptk2, Creb3l1, H2-T-ps, Pxn, Bak1, Ptger4, Mdm2, Fasl, Mapk1, E2f3, Arhgef12, H2-Q2, Plcb4, Ikbkb, Creb3l4, Rheb, H2-M9, Grb2, Ppp3cc, Ccr1, Mtor, Cycs, Calr, H2-T3, Crkl</i>                                                                       |
| 7 | mmu03040 | Spliceosome                             | 81 | 2.36E-15    | <i>Hspa8, U2af1, Tcerg1, Hspa2, Srsf3, Hnrnpc, Hnrnpa1, Ddx39b, Hnrnpk, Srsf5, Eif4a3, Snrpd1, Hspa1a, Rbm17, Sf3b3, Smndc1, Alyref, Tra2a, Rbm25, Prpf31, Snrpa1, Srsf10, Sf3b1, Srsf7, Tra2b, Usp39, Hspa1b, U2af2, Rbm8a, Prpf38b, Wbp11, Dhx15, Srsf2, Hnrnpa3, Magoh, Srsf6, Ncbp1, Snu13, Ddx5, Thoc1, Prpf38a, Puf60, Snrpa, Eftud2, Ppie, Ddx23, Sf3a2, Dhx38, Thoc3, Plrg1, Rbm22,</i>                                                                                                                                                                                                                                                                |

|    |          |                                                 |    |             |                                                                                                                                                                                                                                                                                                                                                                                                                                                                                                                                                                                |
|----|----------|-------------------------------------------------|----|-------------|--------------------------------------------------------------------------------------------------------------------------------------------------------------------------------------------------------------------------------------------------------------------------------------------------------------------------------------------------------------------------------------------------------------------------------------------------------------------------------------------------------------------------------------------------------------------------------|
|    |          |                                                 |    |             | <i>Rbmxl1, Srsf1, Magohb, Snrpf, Prpf4, Snrnp40, Dhx8, Xab2, U2surp, Sf3b6, Zmat2, Isy1, Snrnp70, Gm16286, Pcbp1, Snrpb2, Snrpd3, Snrpb, Sart1, Ddx42, Prpf40a, Ddx46, Sf3a3, Hnrnpu, Prpf18, Snrpc, Snrpd2, Snrpe, Lsm4, Cwc15</i>                                                                                                                                                                                                                                                                                                                                            |
| 8  | mmu04621 | NOD-like receptor signaling pathway             | 81 | 2.14E-10    | <i>Cxcl1, Il6, Cxcl2, Ccl2, Tnfaip3, Ccl5, Ikbke, Nfkb1a, Il1b, Gbp5, Irf7, Birc3, Oas1g, Stat2, Nfkbib, Myd88, Gbp3, Oas3, Tbk1, Nlrp3, Ifi207, Irf9, Cxcl3, Casp4, Gbp2, Birc2, Nampt, Ifi204, Stat1, Tnf, Oas1a, Ccl12, Gbp7, Oas2, Mefv, Hsp90ab1, Txn1, Rnf31, Camp, Ripk2, Tank, Nod2, Panx1, Rela, Cybb, Bcl2l1, Oas1b, Tmem173, Txnip, Hsp90aa1, Chuk, Jak1, Nod1, Prkcd, Nfkb1, Gsdmd, Casp12, Nek7, Ripk1, Ripk3, Casp8, Traf2, Erbin, Casp1, Casr, Mapk1, Mcu, Ifnar2, Traf6, Brcc3, Atg12, Dhx33, Jun, Tab2, Plcb4, Ikbkb, Aim2, Dnm1l, Vdac2, Txn2, Ifnar1</i>    |
| 9  | mmu05167 | Kaposi sarcoma-associated herpesvirus infection | 81 | 1.03E-05    | <i>Cxcl1, Il6, Cxcl2, Zfp36, Cdkn1a, Ikbke, Nfkb1a, Hif1a, Fas, Irf7, Pik3r5, H2-Q4, Myc, Stat2, Tbk1, Irf9, Cxcl3, Stat1, Tlr3, Rcan1, H2-Q6, Icam1, Hck, Ptgs2, Stat3, H2-Q7, H2-T22, Fos, Rela, Pik3r6, Mapkapk2, Csf2, Gng12, Eif2ak2, Map2k1, H2-K1, Ubb, H2-M3, Lyn, Angpt2, H2-T23, Chuk, Jak1, Nfkb1, Jak2, Map2k4, Ifngr1, Nras, Casp8, Bid, Tnfrsf1a, Traf2, H2-T24, Gnb4, Rac1, Ccr5, Bax, H2-D1, Trp53, H2-T-ps, Ccr8, Atg14, Bak1, Map2k7, Mapk1, Ifnar2, E2f3, Crebbp, H2-Q2, Jun, Ikbkb, H2-M9, Cd86, Becn1, Il6st, Ppp3cc, Ccr1, Mtor, Cyts, Ifnar1, H2-T3</i> |
| 10 | mmu05164 | Influenza A                                     | 75 | 6.97E-09    | <i>Il6, Ccl2, Ccl5, Ikbke, Rsad2, Mx2, Socs3, Nfkb1a, Cxcl10, Il1b, Fas, Irf7, Oas1g, Stat2, Nfkbib, Myd88, Oas3, Tbk1, Nlrp3, Irf9, Stat1, Tlr3, Tnf, Icam1, Oas1a, Ccl12, Oas2, Hspa8, Ddx58, Il1a, Hspa2, Ifih1, Trim25, Pml, Ddx39b, Rela, Eif2ak2, Map2k1, Hspa1a, Eif2s1, Tnfsf10, Adar, Oas1b, Actb, Ifng, Jak1, Nup98, Nfkb1, Jak2, Tnfrsf10b, Map2k4, Ifngr1, Hspa1b, Rae1, Tnfrsf1a, Actg1, Casp1, Map2k3, Agfg1, Eif2ak1, Map2k7, Fasl, Furin, Mapk1, Ifnar2, Eif2ak4, Kpna1, Crebbp, Ivns1abp, Jun, Il33, Ikbkb, Tlr7, Cyts, Ifnar1</i>                            |
| 11 | mmu05170 | Human immunodeficiency virus 1 infection        | 72 | 0.045837658 | <i>Tap1, Nfkb1a, Fas, Bst2, H2-Q4, Myd88, Trim30d, Tbk1, Tnf, H2-Q6, Apobec3, Samhd1, Tap2, H2-Q7, H2-T22, Fos, Tlr2, Rela, Gng12, Bcl2l1, Map2k1, Tapbp, H2-K1, H2-M3, Tmem173, B2m, Trim12c, H2-T23, Chuk, Nfkb1, Nras, Tnfrsf1b, Ripk1, Casp8, Bid, Tnfrsf1a, Traf2, H2-T24, Rac2, Gnb4, Rac1, Mb21d1, Ccr5, Bax, H2-D1, Map2k3, Ptk2, H2-T-ps, Pxn, Fbxw11, Bak1, Map2k7, Fasl, Mapk1, Cul1, Traf6, H2-Q2, Jun, Tab2, Ikbkb, Cfl1, H2-M9, Pak2, Ppp3cc, Cdc25c, Cul5, Pak6,</i>                                                                                            |

|    |          |                                             |    |             |                                                                                                                                                                                                                                                                                                                                                                                                                                                                                                               |
|----|----------|---------------------------------------------|----|-------------|---------------------------------------------------------------------------------------------------------------------------------------------------------------------------------------------------------------------------------------------------------------------------------------------------------------------------------------------------------------------------------------------------------------------------------------------------------------------------------------------------------------|
|    |          |                                             |    |             | <i>Mtor, Cycs, Calr, H2-T3, Crkl</i>                                                                                                                                                                                                                                                                                                                                                                                                                                                                          |
| 12 | mmu05152 | Tuberculosis                                | 68 | 0.000235258 | <i>Sphk1, Il6, Clec4e, Il1b, Irak2, Myd88, Fcgr4, Fcgr1, Cd14, Stat1, Fcgr2b, Tnf, Tcigr1, Cebpb, Lbp, Il1a, Atp6v1h, Camp, Malt1, Apaf1, Ripk2, Cyp27b1, Nod2, Tlr2, Bcl10, Rela, Sphk2, Fcer1g, Nos2, Il10, Vdr, Rab7, Ifng, Cd209a, Jak1, Nfkb1, Hspa9, Jak2, Camk2d, Ifngr1, Nfyb, Hspd1, Casp8, Bid, Tnfrsf1a, Il10ra, Rab5c, Itgam, Bax, Atp6v0c, Tirap, Cd209c, Plk3, Itgb2l, Mapk1, Cd209e, Traf6, Lamp2, Crebbp, Arhgef12, Rfx5, Fcgr3, Tgfb2, Nfyc, Camk2b, Ppp3cc, Rab5a, Cycs</i>                 |
| 13 | mmu04062 | Chemokine signaling pathway                 | 68 | 0.014837014 | <i>Cxcl1, Cxcl9, Cxcl2, Ccl2, Ccl5, Ccl7, Ccl22, Nfkb1a, Cxcl10, Ccl4, Pik3r5, Ccl3, Stat2, Nfkbib, Ccl17, Cxcl5, Cxcl3, Ccr7, Stat1, Hck, Ccl12, Stat3, Fgr, Cxcr2, Cxcl16, Ccl9, Rela, Cxcl14, Pik3r6, Gng12, Map2k1, Lyn, Ccl11, Chuk, Prkcd, Nfkb1, Cx3cl1, Jak2, Nras, Vav1, Itk, Grk5, Rock2, Adcy2, Rac2, Gnb4, Rac1, Ccr5, Cdc42, Grk1, Ptk2, Pxn, Jak3, Ccl24, Ccr8, Grk2, Ppbp, Mapk1, Rap1b, Ccl19, Gm2564, Plcb4, Ikbkb, Grb2, Xcl1, Ccr1, Rap1a, Crkl</i>                                        |
| 14 | mmu05162 | Measles                                     | 66 | 6.97E-09    | <i>Il6, Tnfaip3, Ikbke, Mx2, Nfkb1a, Il1b, Fas, Irf7, Oas1g, Stat2, Nfkbib, Myd88, Slamf1, Oas3, Tbk1, Irf9, Stat5a, Stat1, Fcgr2b, Il2rg, Oas1a, Oas2, Hspa8, Stat3, Ddx58, Il1a, Cblb, Hspa2, Ifih1, Tlr2, Rela, Eif2ak2, Hspa1a, Eif2s1, Tnfsf10, Adar, Oas1b, Il2ra, Ifng, Cd209a, Chuk, Jak1, Nfkb1, Jak2, Tnfrsf10b, Ifngr1, Hspa1b, Il2rb, Dok1, Csnk2a2, Trp53, Cd209c, Jak3, Msn, Eif2ak1, Fasl, Ifnar2, Cd209e, Traf6, Eif2ak4, Tab2, Tlr7, Csnk2b, Ccne1, Rack1, Ifnar1</i>                        |
| 15 | mmu04141 | Protein processing in endoplasmic reticulum | 66 | 0.000531441 | <i>Ppp1r15a, Hspa8, Hsp90ab1, Hspa2, Atf4, Eif2ak2, Hspa1a, Eif2s1, Sec24a, Nploc4, Ube2d3, Stt3b, Hsp90aa1, Preb, Hspa5, Plaa, Lman1l, Dnaja2, Ube2g2, Sar1a, Hspa1b, Casp12, Xbp1, Dnajb12, Traf2, Sec23b, Rad23b, Sec13, Bax, Dnajb11, Ufd1, Fbxo6, Ero1l, Ckap4, Nfe2l2, Atf6, Selenos, Cryab, Ssr1, Ssr2, Eif2ak1, Syvn1, Bak1, Wfs1, Map2k7, Dnajc5, Cul1, Ube2j2, Eif2ak4, Nsf1c, Ssr3, Ugg1, Ube2j1, Amfr, Vcp, Rad23a, Hspbbp1, Hsph1, Rrbp1, Canx, Mbtps2, Ubqln1, March6, Calr, Herpud1, Hyou1</i> |
| 16 | mmu04217 | Necroptosis                                 | 65 | 8.01E-06    | <i>Tnfaip3, Il1b, Fas, Birc3, Stat2, Zbp1, Mkl1, Nlrp3, Irf9, Birc2, Stat5a, Stat1, Tlr3, Tnf, Chmp4b, Stat3, Glul, Hsp90ab1, H2afy, Il1a, Rnf31, Cybb, Pla2g4c, Eif2ak2, Slc25a5, Tnfsf10, Parp3, Pla2g4e, Ifng, Hsp90aa1, Jak1, Jak2, Tnfrsf10b, Camk2d, Ifngr1, Fth1, Ripk1, Ripk3, Pygm, Casp8, Bid, Tnfrsf1a, Traf2, Cflar, Bax, Casp1, Jak3,</i>                                                                                                                                                        |

|    |          |                                         |    |             |                                                                                                                                                                                                                                                                                                                                                                                                                                                               |
|----|----------|-----------------------------------------|----|-------------|---------------------------------------------------------------------------------------------------------------------------------------------------------------------------------------------------------------------------------------------------------------------------------------------------------------------------------------------------------------------------------------------------------------------------------------------------------------|
|    |          |                                         |    |             | <i>Chmp2a, Pgam5, Fasl, Pla2g4d, Ppid, Ifnar2, Il33, Chmp1b, Dnm1l, Stat4, Chmp1a, Ppia, Camk2b, Vdac2, Slc25a4, Sqstm1, Cyld, Ifnar1</i>                                                                                                                                                                                                                                                                                                                     |
| 17 | mmu04668 | TNF signaling pathway                   | 64 | 1.47E-10    | <i>Cxcl1, Il6, Cxcl2, Ccl2, Tnfaip3, Junb, Ccl5, Socs3, Nfkb1a, Cxcl10, Il1b, Fas, Birc3, Irf1, Mmp3, Ifi47, Map3k8, Mkl1, Bcl3, Cxcl3, Birc2, Traf1, Tnf, Icam1, Vcam1, Ccl12, Cebpb, Ptgs2, Lif, Edn1, Nod2, Fos, Rela, Csf2, Atf4, Map2k1, Mmp14, Chuk, Nfkb1, Cx3cl1, Map2k4, Sele, Tnfrsf1b, Ripk1, Ripk3, Casp8, Casp7, Tnfrsf1a, Traf2, Cflar, Csf1, Dab2ip, Gm5431, Map2k3, Creb3l1, Il15, Pgam5, Map2k7, Mapk1, Jun, Tab2, Ikbkb, Dnm1l, Creb3l4</i> |
| 18 | mmu05202 | Transcriptional misregulation in cancer | 63 | 0.016349133 | <i>Il6, Cdkn1a, Runx1, Cd40, Birc3, Mmp3, Myc, Jmjd1c, H3f3b, Bcl2a1b, Gadd45a, Fcgr1, Cd14, Nfkb1z, Bcl2a1d, Gzmb, Traf1, Bcl2a1a, Smad1, Prom1, Cebpb, Rel, Taf15, Etv6, Gadd45b, Pml, Foxo1, Rela, Nupr1, Nr4a3, Csf2, Bcl2l1, Elk4, Nfkb1, Max, Aff1, Dot1l, Gadd45g, Il2rb, Zbtb16, Ewsr1, Igfbp3, Ddx5, Itgam, Bax, Id2, Zbtb17, Trp53, Ptk2, Hpgd, Spi1, Atf1, Bak1, Mdm2, Slc45a3, Fus, Cdk9, Plat, Cd86, Ccnt1, Il1r2, Mitf, Pax5</i>                |
| 19 | mmu04210 | Apoptosis                               | 61 | 1.59E-05    | <i>Tuba1c, Nfkb1a, Fas, Birc3, Ngf, Bcl2a1b, Gadd45a, Daxx, Birc2, Bcl2a1d, Gzmb, Traf1, Bcl2a1a, Tnf, Bcl2l11, Apaf1, Gadd45b, Fos, Csf2rb, Rela, Atf4, Bcl2l1, Map2k1, Mcl1, Eif2s1, Prf1, Tnfsf10, Parp3, Actb, Csf2rb2, Chuk, Nfkb1, Pmaip1, Tnfrsf10b, Il3ra, Htra2, Casp12, Nras, Gadd45g, Ripk1, Casp8, Casp7, Bid, Tnfrsf1a, Traf2, Cflar, Tuba8, Bax, Tuba4a, Actg1, Dab2ip, Trp53, Ctst, Bak1, Fasl, Mapk1, Jun, Ikbkb, Tuba1b, Ctsz, Cysc</i>      |
| 20 | mmu04145 | Phagosome                               | 60 | 0.009509006 | <i>Tuba1c, Tap1, H2-Q4, Fcgr4, Fcgr1, Tubb6, Cd14, Fcgr2b, H2-Q6, Tc1rg1, Stx12, Msr1, Olr1, Atp6v1h, Tap2, H2-Q7, H2-T22, Tlr2, Thbs1, Cybb, Atp6v1b2, Itga5, H2-K1, H2-M3, Actb, Rab7, H2-T23, Cd209a, Dync1li1, Tubb4b, Stx7, Tubb3, H2-T24, Rab5c, Tuba8, Itgam, Rac1, H2-D1, Tuba4a, Actg1, Atp6v0c, Ctst, Cd209c, H2-T-ps, Sftpa1, Itgb2l, Cd209e, Lamp2, H2-Q2, Fcgr3, H2-M9, Pikfyve, Stx18, Tuba1b, Canx, M6pr, Tfrc, Rab5a, Calr, H2-T3</i>         |
| 21 | mmu04218 | Cellular senescence                     | 60 | 0.039700493 | <i>Il6, Cdkn1a, Serpine1, H2-Q4, Myc, Gadd45a, H2-Q6, Smad3, Il1a, Gadd45b, H2-Q7, H2-T22, Foxo1, Rela, Mapkapk2, Zfp36l1, Map2k1, Slc25a5, H2-K1, Cacna1d, H2-M3, Eif4ebp1, H2-T23, E2f4, Nfkb1, Mybl2, Nras, Gadd45g, Ets1, Igfbp3, H2-T24, H2-D1, Trp53, Map2k3, H2-T-ps, Traf3ip2, Fbxw11, Mdm2, Mapk1, Ppid,</i>                                                                                                                                         |

|    |          |                                   |    |             |                                                                                                                                                                                                                                                                                                                                                                                                              |
|----|----------|-----------------------------------|----|-------------|--------------------------------------------------------------------------------------------------------------------------------------------------------------------------------------------------------------------------------------------------------------------------------------------------------------------------------------------------------------------------------------------------------------|
|    |          |                                   |    |             | <i>E2f5, Trpv4, Mcu, E2f3, H2-Q2, Rbl1, Nbn, Tgfb2, Ppp1cc, Rheb, H2-M9, Hipk1, Vdac2, Ppp3cc, Ccne1, Slc25a4, Sqstm1, Mtor, H2-T3, Foxm1</i>                                                                                                                                                                                                                                                                |
| 22 | mmu04630 | JAK-STAT signaling pathway        | 57 | 0.003473429 | <i>Il6, Ptpn2, Cdkn1a, Socs3, Il15ra, Csf3r, Csf3, Il4ra, Pim1, Myc, Stat2, Osmr, Irf9, Stat5a, Stat1, Il22, Il2rg, Il19, Stat3, Il13ra1, Lif, Socs1, Il20rb, Csf2rb, Csf2, Bcl2l1, Mcl1, Il10, Il2ra, Ifng, Csf2rb2, Egfr, Jak1, Jak2, Ifngr1, Il7r, Il3ra, Il2rb, Il10ra, Crlf2, Osm, Il13ra2, Cntfr, Thpo, Il15, Jak3, Socs2, Ifnar2, Crebbp, Pdgfrb, Il20ra, Stat4, Il6st, Grb2, Pias1, Mtor, Ifnar1</i> |
| 23 | mmu04380 | Osteoclast differentiation        | 55 | 0.000335462 | <i>Junb, Socs3, Nfkb1a, Il1b, Stat2, Fcgr4, Relb, Fcgr1, Irf9, Fosl1, Stat1, Lcp2, Fcgr2b, Tnf, Nfkb2, Socs1, Il1a, Il1r1, Fos, Pirb, Rela, Lilrb4a, Map2k1, Ifng, Chuk, Jak1, Nfkb1, Ifngr1, Fosl2, Lck, Tnfrsf1a, Traf2, Rac1, Csf1, Sirpb1b, Tnfrsf11a, Tnfsf11, Spi1, Map2k7, Mapk1, Ifnar2, Traf6, Jun, Tab2, Calcr, Ikbbk, Fcgr3, Tgfb2, Grb2, Ppp3cc, Gab2, Mitf, Sqstm1, Cyld, Ifnar1</i>            |
| 24 | mmu03008 | Ribosome biogenesis in eukaryotes | 54 | 6.21E-14    | <i>Gnl3, Eif6, Nop56, Wdr43, Utp14a, Pwp2, Gtpbp4, Gar1, Tbl3, Fbl, Nhp2, Heatr1, Nmd3, Nat10, Lsg1, Utp4, Wdr75, Nop58, Spata5, Utp15, Gnl2, Pop1, Ran, Nob1, Mphosph10, Tcof1, Rcl1, Rrp7a, Riok1, Mdn1, Dkc1, Wdr36, Riok2, Utp18, Xrn2, Snu13, Fcf1, Csnk2a2, Wdr3, Efl1, Imp4, Nol6, Nvl, Utp6, Sbd5, Rpp38, Imp3, Rexo1, Bms1, Rpp40, Csnk2b, Rpp30, Rexo2, Emg1</i>                                   |
| 25 | mmu04064 | NF-kappa B signaling pathway      | 53 | 2.22E-07    | <i>Cxcl2, Tnfaip3, Nfkb1a, Cd40, Il1b, Ccl4, Birc3, Myd88, Relb, Bcl2a1b, Birc2, Cd14, Bcl2a1d, Traf1, Bcl2a1a, Tnf, Nfkb2, Icam1, Vcam1, Card14, Ptgs2, Lbp, Ddx58, Malt1, Trim25, Il1r1, Gadd45b, Bcl10, Rela, Bcl2l1, Lyn, Chuk, Nfkb1, Ripk1, Zap70, Lck, Tnfrsf1a, Traf2, Cflar, Csnk2a2, Ltbr, Tnfrsf11a, Tnfsf11, Tirap, Ly96, Ube2i, Traf6, Ccl19, Gm2564, Tab2, Ikbbk, Tnfsf14, Csnk2b</i>          |
| 26 | mmu05160 | Hepatitis C                       | 53 | 7.12E-05    | <i>Cdkn1a, Ikbbk, Socs3, Nfkb1a, Irf7, Irf1, Oas1g, Ifit1, Stat2, Ldlr, Oas3, Tbk1, Irf9, Stat1, Tlr3, Tnf, Cldn5, Oas1a, Oas2, Stat3, Ddx58, Psme3, Rela, Eif2ak2, Eif2s1, Ifit1b1l, Ppp2r2d, Oas1b, Ppp2ca, Chuk, Egfr, Jak1, Nfkb1, Ppp2r2a, Nras, Ripk1, Tnfrsf1a, Traf2, Ppp2r1a, Trp53, Ppp2cb, Eif3e, Ppara, Eif2ak1, Mapk1, Ifnar2, Traf6, Eif2ak4, Cldn1, Ikbbk, Grb2, Pias1, Ifnar1</i>            |
| 27 | mmu05161 | Hepatitis B                       | 51 | 0.008884785 | <i>Il6, Cdkn1a, Ikbbk, Nfkb1a, Fas, Irf7, Myc, Stat2, Myd88, Tbk1, Stat5a, Stat1, Tlr3, Tnf, Stat3, Ddx58, Ifih1, Apaf1, Fos, Tlr2, Rela, Atf4, Map2k1, Pcna, Ddx3x, Chuk, Jak1, Nfkb1, Map2k4, Casp12, Nras, Casp8, Bax, Trp53, Creb3l1, Tirap, Ywhaz, Fasl,</i>                                                                                                                                            |

|    |          |                                          |    |             |                                                                                                                                                                                                                                                                                                                                                           |
|----|----------|------------------------------------------|----|-------------|-----------------------------------------------------------------------------------------------------------------------------------------------------------------------------------------------------------------------------------------------------------------------------------------------------------------------------------------------------------|
|    |          |                                          |    |             | <i>Egr2, Mapk1, E2f3, Crebbp, Jun, Ikbkb, Tgfb2, Creb3l4, Stat4, Grb2, Ccne1, Cycs, Ifnar1</i>                                                                                                                                                                                                                                                            |
| 28 | mmu04657 | IL-17 signaling pathway                  | 49 | 4.57E-08    | <i>Lcn2, Cxcl1, Il6, Cxcl2, Ccl2, Tnfaip3, S100a8, S100a9, Ikbke, Ccl7, Nfkb1a, Cxcl10, Il1b, Mmp13, Csf3, Mmp3, Ccl17, Cxcl5, Tbk1, Cxcl3, Fosl1, Il17a, Tnf, Il17f, Ccl12, Cebpb, Ptgs2, Hsp90ab1, Fos, Il17ra, Rela, Csf2, Ccl11, Ifng, Mapk6, Hsp90aa1, Chuk, Nfkb1, Casp8, Traf2, Usp25, Srsf1, Traf3ip2, Mapk1, Traf6, Jun, Tab2, Ikbkb, Elavl1</i> |
| 29 | mmu04620 | Toll-like receptor signaling pathway     | 45 | 1.17E-05    | <i>Cxcl9, Il6, Ccl5, Ikbke, Nfkb1a, Cxcl10, Cd40, Il1b, Irf7, Ccl4, Ccl3, Myd88, Map3k8, Tbk1, Cd14, Stat1, Tlr3, Tnf, Lbp, Fos, Tlr2, Rela, Map2k1, Cd80, Chuk, Nfkb1, Map2k4, Ripk1, Casp8, Rac1, Map2k3, Tirap, Ly96, Tollip, Map2k7, Mapk1, Ifnar2, Traf6, Jun, Tab2, Ikbkb, Cd86, Spp1, Tlr7, Ifnar1</i>                                             |
| 30 | mmu03015 | mRNA surveillance pathway                | 45 | 1.59E-05    | <i>Etf1, Smg7, Ddx39b, Rnps1, Eif4a3, Ppp2r2d, Alyref, Ppp2ca, Cpsf2, Ppp2r2a, Cstf1, Rbm8a, Magoh, Ncbp1, Ppp2r1a, Rnmt, Srrm1, Cpsf1, Ppp2cb, Pym1, Rngtt, Pabpc1, Cstf3, Cpsf7, Magohb, Clp1, Pabpc1l, Msi1, Gspt2, Fip1l1, Gspt1, Casc3, Wdr33, Pcf11, Sap18b, Ssu72, Ppp2r3c, Ppp1cc, Pelo, Gm2446, Nudt21, Cstf2, Pnn, Sap18, Sympk</i>             |
| 31 | mmu05145 | Toxoplasmosis                            | 44 | 0.007438348 | <i>Nfkb1a, Cd40, Irgm1, Pik3r5, Birc3, Igtp, Ldlr, Nfkbib, Myd88, Birc2, Stat1, Tnf, Hspa8, Stat3, Socs1, Hspa2, Tlr2, Rela, Pik3r6, Lamc2, Bcl2l1, Hspa1a, Nos2, Il10, Ifng, Chuk, Jak1, Nfkb1, Jak2, Ifngr1, Hspa1b, Lama5, Casp8, Tnfrsf1a, Il10ra, Ccr5, Map2k3, Ly96, Mapk1, Traf6, Tab2, Ikbkb, Tgfb2, Cycs</i>                                     |
| 32 | mmu04066 | HIF-1 signaling pathway                  | 43 | 0.006442061 | <i>Il6, Cdkn1a, Hif1a, Slc2a1, Serpine1, Timp1, Stat3, Edn1, Pfkfb3, Rela, Cybb, Egln2, Map2k1, Nos2, Eif4ebp1, Angpt2, Pfk1, Ifng, Egfr, Nfkb1, Camk2d, Ifngr1, Eif4e2, Hmox1, Hk2, Egln3, Ltbr, Aldoa, Eno2, Rps6, Rps6-ps4, Ldha, Eif4e, Eno3, Mapk1, Arnt, Hk3, Crebbp, Pgk1, Eno1, Camk2b, Tfr, Mtor</i>                                             |
| 33 | mmu04625 | C-type lectin receptor signaling pathway | 43 | 0.021748277 | <i>Il6, Ikbke, Ccl22, Nfkb1a, Clec4e, Il1b, Irf1, Clec4d, Stat2, Ccl17, Relb, Nlrp3, Bcl3, Irf9, Stat1, Tnf, Nfkb2, Ptgs2, Cblb, Malt1, Bcl10, Rela, Mapkapk2, Fcer1g, Il10, Cd209a, Chuk, Prkcd, Nfkb1, Nras, Casp8, Casp1, Cd209c, Plk3, Mdm2, Egr2, Mapk1, Cd209e, Arhgef12, Jun, Ikbkb, Ppp3cc, Cyld</i>                                              |
| 34 | mmu03050 | Proteasome                               | 39 | 6.21E-14    | <i>Psmb8, Psmb10, Psmb9, Psme3, Psme2, Psme1, Psmd11, Psmd3, Psme2b, Ifng, Psmc4, Psma5, Adrm1, Psmc2, Psmd14, Psmb2, Psmd4, Psmd8, Psma2, Psmd7,</i>                                                                                                                                                                                                     |

|    |          |                                           |    |             |                                                                                                                                                                                                                                                                                        |
|----|----------|-------------------------------------------|----|-------------|----------------------------------------------------------------------------------------------------------------------------------------------------------------------------------------------------------------------------------------------------------------------------------------|
|    |          |                                           |    |             | <i>Psmc2, Psma7, Psmc1, Psma3, Psmf1, Psmb4, Psmc5, Psma6, Psmb7, Pomp, Psma4, Psmc1, Psmb3, Psmc6, Psmc12, Psmb11, Psmb6, Psmb1, Psmc3</i>                                                                                                                                            |
| 35 | mmu04612 | Antigen processing and presentation       | 39 | 1.67E-05    | <i>Tap1, H2-Q4, Tnf, H2-Q6, Hspa8, Hsp90ab1, Psme3, Psme2, Hspa2, Psme1, Tap2, H2-Q7, H2-T22, Hspa1a, Tapbp, H2-K1, H2-M3, B2m, Psme2b, Ifng, H2-T23, Hsp90aa1, Hspa5, Nfyb, Hspa1b, H2-T24, H2-D1, Ctst, H2-T-ps, Hspa4, H2-Q2, Rfx5, Nfyc, H2-M9, Canx, Klrc1, Calr, H2-T3, Cd8a</i> |
| 36 | mmu05142 | Chagas disease (American trypanosomiasis) | 39 | 0.039456274 | <i>Il6, Ccl2, Ccl5, Nfkb1a, Il1b, Fas, Ccl3, Serpine1, Myd88, Tnf, Ccl12, Smad3, Fos, Tlr2, Rela, Nos2, Il10, Ppp2r2d, Ppp2ca, Ifng, Chuk, Nfkb1, Map2k4, Ifngr1, Ppp2r2a, Casp8, Tnfrsf1a, Cflar, Ppp2r1a, Ppp2cb, Fasl, Mapk1, Traf6, Jun, Plcb4, Ikbkb, Tgfb2, Gnal, Calr</i>       |
| 37 | mmu05132 | Salmonella infection                      | 35 | 0.004219399 | <i>Cxcl1, Il6, Cxcl2, Il1b, Ccl4, Ccl3, Myd88, Cxcl3, Cd14, Lbp, Il1a, Plekha7, Fos, Rela, Csf2, Flnc, Nos2, Actb, Rab7, Ifng, Dync1li1, Nfkb1, Ifngr1, Arpc3, Rock2, Rac1, Cdc42, Actg1, Casp1, Rhog, Arpc5, Mapk1, Flnb, Jun, Arpc2</i>                                              |
| 38 | mmu03018 | RNA degradation                           | 34 | 0.006442061 | <i>Btg1, Btg2, Pnpt1, Exosc1, Exosc2, Mphosph6, Pfkf, Hspa9, Dis3, Cnot2, Hspd1, Exosc9, Btg3, Zcchc7, Xrn2, Cnot6, Dcp2, Eno2, Cnot7, Tent4a, Exosc10, Exosc3, Pabpc1, Dhx36, Skiv2l, Dcp1a, Pabpc1l, Eno3, Pfkf, Patl1, Ttc37, Eno1, Edc4, Lsm4</i>                                  |
| 39 | mmu05134 | Legionellosis                             | 33 | 1.59E-05    | <i>Cxcl1, Il6, Cxcl2, Nfkb1a, Il1b, Myd88, Cxcl3, Cd14, Tnf, Nfkb2, Hspa8, Hspa2, Apaf1, Tlr2, Rela, Arf1, Hspa1a, Nfkb1, Sar1a, Hspa1b, Hspd1, Casp8, Casp7, Itgam, Casp1, Eef1g, Itgb2l, Bnip3, Hsf1, Eef1a2, Vcp, Rab1a, Cyts</i>                                                   |
| 40 | mmu05416 | Viral myocarditis                         | 32 | 0.0045993   | <i>Cd40, H2-Q4, H2-Q6, Icam1, H2-Q7, H2-T22, Prf1, H2-K1, H2-M3, Actb, Cd80, H2-T23, Eif4g2, Casp8, Bid, H2-T24, Rac2, Rac1, H2-D1, Abl2, Actg1, H2-T-ps, Sgca, Eif4g3, Itgb2l, H2-Q2, H2-M9, Cd86, Eif4g1, Sgcb, Cyts, H2-T3</i>                                                      |
| 41 | mmu05323 | Rheumatoid arthritis                      | 31 | 0.039963171 | <i>Il6, Ccl2, Ccl5, Il1b, Ccl3, Mmp3, Cxcl5, Il17a, Tnf, Icam1, Tcrg1, Ccl12, Il1a, Atp6v1h, Fos, Ctla4, Tlr2, Atp6v1b2, Csf2, Cd80, Ifng, Csf1, Tnfrsf11a, Atp6v0c, Tnfrsf11, Ctst, Il15, Itgb2l, Jun, Tgfb2, Cd86</i>                                                                |
| 42 | mmu05140 | Leishmaniasis                             | 30 | 0.006558166 | <i>Nfkb1a, Il1b, Marcksl1, Nfkb1b, Myd88, Fcgr4, Fcgr1, Stat1, Tnf, Ptgs2, Il1a, Fos, Tlr2, Rela, Cybb, Nos2, Il10, Ifng, Jak1, Nfkb1, Jak2, Ifngr1, Itgam, Itgb2l, Mapk1, Traf6, Jun, Tab2, Fcgr3, Tgfb2</i>                                                                          |
| 43 | mmu04623 | Cytosolic DNA-sensing pathway             | 29 | 3.53E-05    | <i>Il6, Ccl5, Ikbke, Nfkb1a, Cxcl10, Il1b, Irf7, Ccl4, Nfkb1b, Zbp1, Tbk1, Ddx58, Polr3d, Rela, Adar, Tmem173, Chuk, Nfkb1, Ripk1, Ripk3, Mb21d1, Casp1, Polr3h, Polr3a,</i>                                                                                                           |

|    |          |                                       |    |             |                                                                                                                                                                                                          |
|----|----------|---------------------------------------|----|-------------|----------------------------------------------------------------------------------------------------------------------------------------------------------------------------------------------------------|
|    |          |                                       |    |             | <i>Polr3c, Polr3e, Il33, Ikbkb, Aim2</i>                                                                                                                                                                 |
| 44 | mmu04622 | RIG-I-like receptor signaling pathway | 28 | 0.000742773 | <i>Isg15, Ikbke, Nfkbia, Cxcl10, Irf7, Nfkbib, Dhx58, Tbk1, Tnf, Ddx58, Ifih1, Trim25, Tank, Rela, Azi2, Rnf125, Tmem173, Ddx3x, Chuk, Nfkb1, Ripk1, Casp8, Traf2, Otud5, Traf6, Atg12, Ikbkb, Cylid</i> |
| 45 | mmu05221 | Acute myeloid leukemia                | 28 | 0.032457495 | <i>Runx1, Pim1, Myc, Bcl2a1b, Fcgr1, Cd14, Stat5a, Bcl2a1d, Bcl2a1a, Stat3, Pml, Rela, Csf2, Map2k1, Ppard, Eif4ebp1, Chuk, Nfkb1, Nras, Zbtb16, Itgam, Kit, Spi1, Pim2, Mapk1, Ikbkb, Grb2, Mtor</i>    |
| 46 | mmu00970 | Aminoacyl-tRNA biosynthesis           | 25 | 0.000392725 | <i>Yars, Tars, Wars, Vars, Farsa, Kars, Gars, Nars, Rars, Iars, Cars, Eprs, Hars, Aars, Lars, Farsb, Yars2, Dars, Ears2, Sars, Mars, Rars2, Mtfmt, Qars, Qrs1</i>                                        |
| 47 | mmu05332 | Graft-versus-host disease             | 25 | 0.003473429 | <i>Il6, Il1b, Fas, H2-Q4, Gzmb, Tnf, H2-Q6, Il1a, H2-Q7, H2-T22, Prf1, H2-K1, H2-M3, Cd80, Ifng, H2-T23, H2-T24, H2-D1, H2-T-ps, FasL, H2-Q2, H2-M9, Cd86, Klrc1, H2-T3</i>                              |
| 48 | mmu04940 | Type I diabetes mellitus              | 25 | 0.00782946  | <i>Il1b, Fas, H2-Q4, Gzmb, Tnf, H2-Q6, Il1a, H2-Q7, H2-T22, Prf1, H2-K1, H2-M3, Cd80, Ifng, H2-T23, Hspd1, H2-T24, H2-D1, H2-T-ps, FasL, H2-Q2, H2-M9, Cd86, Cpe, H2-T3</i>                              |
| 49 | mmu05144 | Malaria                               | 24 | 0.004219399 | <i>Il6, Ccl2, Cd40, Il1b, Csf3, Myd88, Ackr1, Tnf, Icam1, Vcam1, Ccl12, Selp, Tlr2, Thbs1, Il10, Ifng, Sele, Hba-a1, Gypc, Itgb2l, Hbb-bs, Hba-a2, Tgfb2, Hbb-bt</i>                                     |
| 50 | mmu05330 | Allograft rejection                   | 23 | 0.006558166 | <i>Cd40, Fas, H2-Q4, Gzmb, Tnf, H2-Q6, H2-Q7, H2-T22, Prf1, H2-K1, Il10, H2-M3, Cd80, Ifng, H2-T23, H2-T24, H2-D1, H2-T-ps, FasL, H2-Q2, H2-M9, Cd86, H2-T3</i>                                          |
| 51 | mmu05320 | Autoimmune thyroid disease            | 23 | 0.012123369 | <i>Cd40, Fas, H2-Q4, Gzmb, H2-Q6, H2-Q7, H2-T22, Ctl4, Prf1, H2-K1, Il10, H2-M3, Cd80, H2-T23, H2-T24, Tg, H2-D1, H2-T-ps, FasL, H2-Q2, H2-M9, Cd86, H2-T3</i>                                           |
| 52 | mmu04216 | Ferroptosis                           | 20 | 0.012259552 | <i>Slc39a14, Slc11a2, Sat1, Slc7a11, Cp, Cybb, Acsl4, Slc3a2, Hmox1, Fth1, Map1lc3b, Gclm, Trp53, Slc39a8, Acsl5, Pcbp1, Gss, Pcbp2, Vdac2, Tfrc</i>                                                     |
| 53 | mmu05143 | African trypanosomiasis               | 18 | 0.006558166 | <i>Il6, Il1b, Fas, Ido1, Myd88, Tnf, Icam1, Vcam1, Il10, Ifng, Sele, Thop1, Hba-a1, FasL, Hbb-bs, Hba-a2, Plcb4, Hbb-bt</i>                                                                              |
| 54 | mmu04215 | Apoptosis - multiple species          | 16 | 0.021227592 | <i>Birc3, Birc2, Bcl2l11, Apaf1, Bcl2l1, Pmaip1, Htra2, Casp8, Casp7, Bid, Tnfrsf1a, Bax, Bak1, Birc6, Becn1, Cycs</i>                                                                                   |
