# Supplementary material for: Transcriptomics Changes in the Peritoneum of Mice with Lipopolysaccharide-Induced Peritonitis
Source: Int J Mol Sci. 2021 Nov 30;22(23):13008. doi: 10.3390/ijms222313008 (PMC8657704; doi:10.3390/ijms222313008)
Supplement: Supplementary file 1 [file ijms-22-13008-s001.zip › ijms-1473149-supplementary/Supplementary_15_Table S14. KEGG enrichment pathways of down-regulated DEGs (TAK vs. LPS).pdf]

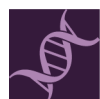

**Table S14.** KEGG enrichment pathways of down-regulated DEGs (TAK vs. LPS)

|   | Pathway ID | Name                           | Gene count | PValue      | Genes                                                                                                                                                                                                                                                                                                                                          |
|---|------------|--------------------------------|------------|-------------|------------------------------------------------------------------------------------------------------------------------------------------------------------------------------------------------------------------------------------------------------------------------------------------------------------------------------------------------|
| 1 | mmu05200   | Pathways in cancer             | 47         | 0.005475722 | <i>Lpar3, Lrp5, Lama2, Il15ra, Nos2, Il4ra, Il2rb, Ralgds, Ncoa4, Gna13, Txnrd1, Gnb4, Wnt2b, Stat5a, Rassf5, Wnt10b, Il6, Ccnd1, Arnt2, Col4a2, Map2k1, Akt3, Notch2, Notch1, Frat2, Adcy9, Lama5, Col4a3, Frat1, Lamc1, Col4a1, Arhgef11, Casp8, Mtor, Egfr, Apaf1, Fos, Nfkb1a, Nfkb1, Rassf1, Raf1, Egl3, Ets1, Fgf23, Stat3, Fn1, Pml</i> |
| 2 | mmu05165   | Human papillomavirus infection | 31         | 0.035578422 | <i>Thbs1, Tnc, Lama2, Pard6g, H2-Q2, Itga9, Itgb3, Wnt2b, Wnt10b, Ccnd1, Col4a2, Map2k1, Akt3, Notch2, Notch1, Rbl1, Lama5, Col4a3, Lamc1, Col4a1, Atm, Maml1, Eif2ak2, Casp8, Mtor, Egfr, Nfkb1, Raf1, Col1a1, Tbk1, Fn1</i>                                                                                                                  |
| 3 | mmu05206   | MicroRNAs in cancer            | 21         | 0.002679119 | <i>Thbs1, Timp3, Tnc, Itgb3, Bmf, Ccnd1, Slc7a1, Map2k1, Notch2, Notch1, Atm, Cd44, Mtor, Egfr, Nfkb1, Rassf1, Raf1, Abcb1a, Shc1, Stat3, St14</i>                                                                                                                                                                                             |
| 4 | mmu04510   | Focal adhesion                 | 21         | 0.035578422 | <i>Thbs1, Tnc, Lama2, Itga9, Itgb3, Ccnd1, Flnb, Col4a2, Map2k1, Akt3, Lama5, Col4a3, Lamc1, Arhgap35, Col4a1, Egfr, Zyx, Raf1, Col1a1, Shc1, Fn1</i>                                                                                                                                                                                          |
| 5 | mmu04668   | TNF signaling pathway          | 20         | 0.000357786 | <i>Sele, Icam1, Lif, Il6, Tnfaip3, Socs3, Map2k1, Map3k8, Akt3, Cxcl2, Cx3cl1, Pgam5, Csf1, Casp8, Cxcl1, Cflar, Fos, Nfkb1a, Nfkb1, Cxcl10</i>                                                                                                                                                                                                |
| 6 | mmu05164   | Influenza A                    | 18         | 0.017932994 | <i>Icam1, Furin, Il6, Ddx58, Socs3, Map2k1, Hspa1a, Akt3, Ifih1, Eif2ak2, Rsad2, Nfkb1a, Nfkb1, Raf1, Cxcl10, Tbk1, Trim25, Pml</i>                                                                                                                                                                                                            |
| 7 | mmu05162   | Measles                        | 16         | 0.019406701 | <i>Il2rb, Stat5a, Il6, Ccnd1, Tnfaip3, Ddx58, Hspa1a, Akt3, Cd209a, Slamf1, Ifih1, Eif2ak2, Nfkb1a, Nfkb1, Stat3, Tbk1</i>                                                                                                                                                                                                                     |
| 8 | mmu05224   | Breast cancer                  | 16         | 0.049134121 | <i>Lrp5, Wnt2b, Wnt10b, Ccnd1, Map2k1, Akt3, Notch2, Notch1, Frat2, Frat1, Mtor, Egfr, Fos, Raf1, Fgf23, Shc1</i>                                                                                                                                                                                                                              |
| 9 | mmu04064   | NF-kappa B signaling           | 15         | 0.007892187 | <i>Malt1, Icam1, Ccl19, Il1r1, Tnf11a, Tnfaip3, Ddx58, Cxcl2, Lck, Atm, Cflar,</i>                                                                                                                                                                                                                                                             |

|    |          | pathway                                                                 |    |             | <i>Nfkb1a, Nfkb1, Trim25, Erc1</i>                                                                           |
|----|----------|-------------------------------------------------------------------------|----|-------------|--------------------------------------------------------------------------------------------------------------|
| 10 | mmu04926 | Relaxin signaling pathway                                               | 15 | 0.048494976 | <i>Nos2, Gnb4, Col4a2, Map2k1, Akt3, Adcy9, Col4a3, Col4a1, Egfr, Fos, Nfkb1a, Nfkb1, Raf1, Col1a1, Shc1</i> |
| 11 | mmu04512 | ECM-receptor interaction                                                | 14 | 0.005475722 | <i>Thbs1, Tnc, Lama2, Itga9, Itgb3, Sv2c, Col4a2, Lama5, Col4a3, Lamc1, Col4a1, Cd44, Col1a1, Fn1</i>        |
| 12 | mmu05146 | Amoebiasis                                                              | 14 | 0.013639723 | <i>Lama2, Nos2, Il1r1, Serpinb9b, Il6, Col4a2, Lama5, Col4a3, Lamc1, Col4a1, Arg2, Nfkb1, Col1a1, Fn1</i>    |
| 13 | mmu04933 | AGE-RAGE signaling pathway in diabetic complications                    | 14 | 0.019406701 | <i>Sele, Icam1, Stat5a, Il6, Ccnd1, Col4a2, Akt3, Col4a3, Col4a1, Nfkb1, Serpine1, Col1a1, Stat3, Fn1</i>    |
| 14 | mmu04657 | IL-17 signaling pathway                                                 | 13 | 0.017805442 | <i>Mapk6, Il6, Tnfaip3, Cxcl2, Casp8, Cxcl1, Traf3ip2, Fos, Nfkb1a, Nfkb1, Cxcl10, Tbk1, Il17ra</i>          |
| 15 | mmu05222 | Small cell lung cancer                                                  | 13 | 0.020248587 | <i>Lama2, Nos2, Ccnd1, Col4a2, Akt3, Lama5, Col4a3, Lamc1, Col4a1, Apaf1, Nfkb1a, Nfkb1, Fn1</i>             |
| 16 | mmu04917 | Prolactin signaling pathway                                             | 12 | 0.007892187 | <i>Tnfrsf11a, Stat5a, Ccnd1, Socs3, Map2k1, Akt3, Cish, Fos, Nfkb1, Raf1, Shc1, Stat3</i>                    |
| 17 | mmu04622 | RIG-I-like receptor signaling pathway                                   | 10 | 0.013639723 | <i>Rnf125, Ddx58, Azi2, Ifih1, Casp8, Nfkb1a, Nfkb1, Cxcl10, Tbk1, Trim25</i>                                |
| 18 | mmu05134 | Legionellosis                                                           | 9  | 0.049134121 | <i>Naip6, Il6, Hspa1a, Cxcl2, Casp8, Cxcl1, Apaf1, Nfkb1a, Nfkb1</i>                                         |
| 19 | mmu00532 | Glycosaminoglycan biosynthesis - chondroitin sulfate , dermatan sulfate | 7  | 0.005300043 | <i>Csgalnact1, Chst15, Chsy3, Chpf2, Chst11, Xylt1, Chst7</i>                                                |
| 20 | mmu00534 | Glycosaminoglycan biosynthesis - heparan sulfate , heparin              | 7  | 0.005475722 | <i>Hs6st1, Ndst1, Hs3st3b1, Xylt1, Ndst2, Extl3, Ext1</i>                                                    |
