# Supplementary material for: Transcriptomics Changes in the Peritoneum of Mice with Lipopolysaccharide-Induced Peritonitis
Source: Int J Mol Sci. 2021 Nov 30;22(23):13008. doi: 10.3390/ijms222313008 (PMC8657704; doi:10.3390/ijms222313008)
Supplement: Supplementary file 1 [file ijms-22-13008-s001.zip › ijms-1473149-supplementary/Supplementary_16_Table S15. Transcriptional factors predicted from the down-regulated DEGs (LPS vs. Control).pdf]

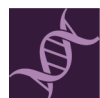

**Table S15.** Transcriptional factors predicted from the down-regulated DEGs (LPS vs. Control)

| #  | Key TF        | Description                                                               | # of overlapped genes | P value | FDR   |
|----|---------------|---------------------------------------------------------------------------|-----------------------|---------|-------|
| 1  | <i>Rbpj</i>   | recombination signal binding protein for immunoglobulin kappa J region    | 3                     | 0.00723 | 0.118 |
| 2  | <i>Isl1</i>   | ISL1 transcription factor, LIM/homeodomain                                | 2                     | 0.0099  | 0.118 |
| 3  | <i>Tbx1</i>   | T-box 1                                                                   | 2                     | 0.013   | 0.118 |
| 4  | <i>Nkx2-5</i> | NK2 homeobox 5                                                            | 3                     | 0.0182  | 0.118 |
| 5  | <i>Gata2</i>  | GATA binding protein 2                                                    | 2                     | 0.0203  | 0.118 |
| 6  | <i>Snai1</i>  | snail family zinc finger 1                                                | 3                     | 0.027   | 0.118 |
| 7  | <i>Mybl2</i>  | myeloblastosis oncogene-like 2                                            | 2                     | 0.0336  | 0.118 |
| 8  | <i>Nfatc1</i> | nuclear factor of activated T cells, cytoplasmic, calcineurin dependent 1 | 2                     | 0.0386  | 0.118 |
| 9  | <i>Gata6</i>  | GATA binding protein 6                                                    | 2                     | 0.0439  | 0.118 |
| 10 | <i>Mecp2</i>  | methyl CpG binding protein 2                                              | 2                     | 0.0495  | 0.118 |

Note: data was obtained from TRRUST (version 2) (<https://www.grnpedia.org/trrust/>)
