# Supplementary material for: Transcriptomics Changes in the Peritoneum of Mice with Lipopolysaccharide-Induced Peritonitis
Source: Int J Mol Sci. 2021 Nov 30;22(23):13008. doi: 10.3390/ijms222313008 (PMC8657704; doi:10.3390/ijms222313008)
Supplement: Supplementary file 1 [file ijms-22-13008-s001.zip › ijms-1473149-supplementary/Supplementary_17_Table S16. Transcriptional factors predicted from the up-regulated DEGs (TAK vs. LPS).pdf]

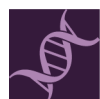

**Table S16.** Transcriptional factors predicted from the up-regulated DEGs (TAK vs. LPS)

| #  | Key TF        | Description                                                                | # of overlapped genes | P value  | FDR      |
|----|---------------|----------------------------------------------------------------------------|-----------------------|----------|----------|
| 1  | <i>Nfkb1</i>  | nuclear factor of kappa light polypeptide gene enhancer in B cells 1, p105 | 35                    | 2.53e-21 | 2.48e-19 |
| 2  | <i>Stat1</i>  | signal transducer and activator of transcription 1                         | 15                    | 1.9e-16  | 8.93e-15 |
| 3  | <i>Rela</i>   | v-rel reticuloendotheliosis viral oncogene homolog A (avian)               | 24                    | 2.73e-16 | 8.93e-15 |
| 4  | <i>Jun</i>    | jun proto-oncogene                                                         | 23                    | 1.86e-14 | 4.56e-13 |
| 5  | <i>Irf1</i>   | interferon regulatory factor 1                                             | 12                    | 5.8e-14  | 1.14e-12 |
| 6  | <i>Rel</i>    | reticuloendotheliosis oncogene                                             | 10                    | 2.75e-10 | 4.49e-09 |
| 7  | <i>Sp1</i>    | trans-acting transcription factor 1                                        | 22                    | 2.22e-07 | 3.1e-06  |
| 8  | <i>Ikbkb</i>  | inhibitor of kappaB kinase beta                                            | 5                     | 3.93e-06 | 4.81e-05 |
| 9  | <i>Trp53</i>  | transformation related protein 53                                          | 15                    | 5.85e-06 | 6.37e-05 |
| 10 | <i>Irf8</i>   | interferon regulatory factor 8                                             | 6                     | 9.17e-06 | 8.98e-05 |
| 11 | <i>Hdac2</i>  | histone deacetylase 2                                                      | 4                     | 4.78e-05 | 0.000382 |
| 12 | <i>Ets1</i>   | E26 avian leukemia oncogene 1, 5' domain                                   | 8                     | 5.01e-05 | 0.000382 |
| 13 | <i>Nr3c1</i>  | nuclear receptor subfamily 3, group C, member 1                            | 5                     | 5.06e-05 | 0.000382 |
| 14 | <i>Nfatc2</i> | nuclear factor of activated T cells, cytoplasmic, calcineurin dependent 2  | 5                     | 8.54e-05 | 0.000597 |
| 15 | <i>Foxo1</i>  | forkhead box O1                                                            | 7                     | 0.000106 | 0.000671 |
| 16 | <i>Dnmt1</i>  | DNA methyltransferase (cytosine-5) 1                                       | 3                     | 0.00011  | 0.000671 |
| 17 | <i>Egr1</i>   | early growth response 1                                                    | 8                     | 0.00019  | 0.0011   |
| 18 | <i>Bcl3</i>   | B cell leukemia/lymphoma 3                                                 | 4                     | 0.000284 | 0.00155  |
| 19 | <i>Cebpb</i>  | CCAAT/enhancer binding protein (C/EBP), beta                               | 6                     | 0.000332 | 0.00171  |
| 20 | <i>Hdac1</i>  | histone deacetylase 1                                                      | 5                     | 0.000362 | 0.00177  |
| 21 | <i>Ep300</i>  | E1A binding protein p300                                                   | 7                     | 0.000385 | 0.00178  |
| 22 | <i>Stat3</i>  | signal transducer and activator of transcription 3                         | 8                     | 0.000399 | 0.00178  |

|    |               |                                                       |   |         |         |
|----|---------------|-------------------------------------------------------|---|---------|---------|
| 23 | <i>Nr4a1</i>  | nuclear receptor subfamily 4, group A, member 1       | 3 | 0.00121 | 0.00515 |
| 24 | <i>Fos</i>    | FBJ osteosarcoma oncogene                             | 6 | 0.00158 | 0.00572 |
| 25 | <i>Id1</i>    | inhibitor of DNA binding 1                            | 3 | 0.00163 | 0.00572 |
| 26 | <i>Irf4</i>   | interferon regulatory factor 4                        | 3 | 0.00163 | 0.00572 |
| 27 | <i>Klf5</i>   | Kruppel-like factor 5                                 | 3 | 0.00163 | 0.00572 |
| 28 | <i>Parp1</i>  | poly (ADP-ribose) polymerase family, member 1         | 3 | 0.00163 | 0.00572 |
| 29 | <i>Stat5a</i> | signal transducer and activator of transcription 5A   | 4 | 0.0022  | 0.00744 |
| 30 | <i>Sp3</i>    | trans-acting transcription factor 3                   | 7 | 0.00266 | 0.0087  |
| 31 | <i>Pax2</i>   | paired box 2                                          | 3 | 0.00343 | 0.0108  |
| 32 | <i>Ppara</i>  | peroxisome proliferator activated receptor alpha      | 5 | 0.00363 | 0.0111  |
| 33 | <i>Daxx</i>   | Fas death domain-associated protein                   | 2 | 0.00483 | 0.0144  |
| 34 | <i>Ikzf1</i>  | IKAROS family zinc finger 1                           | 3 | 0.0051  | 0.0146  |
| 35 | <i>Pparg</i>  | peroxisome proliferator activated receptor gamma      | 5 | 0.00521 | 0.0146  |
| 36 | <i>Myb</i>    | myeloblastosis oncogene                               | 3 | 0.00609 | 0.0157  |
| 37 | <i>Nr1h3</i>  | nuclear receptor subfamily 1, group H, member 3       | 3 | 0.00609 | 0.0157  |
| 38 | <i>Pou2f2</i> | POU domain, class 2, transcription factor 2           | 3 | 0.00609 | 0.0157  |
| 39 | <i>Mtf1</i>   | metal response element binding transcription factor 1 | 2 | 0.00714 | 0.0172  |
| 40 | <i>Tcf21</i>  | transcription factor 21                               | 2 | 0.00714 | 0.0172  |
| 41 | <i>Bcl6</i>   | B cell leukemia/lymphoma 6                            | 3 | 0.00719 | 0.0172  |
| 42 | <i>Klf4</i>   | Kruppel-like factor 4 (gut)                           | 3 | 0.0084  | 0.0187  |
| 43 | <i>Nr0b2</i>  | nuclear receptor subfamily 0, group B, member 2       | 3 | 0.0084  | 0.0187  |
| 44 | <i>Tcf4</i>   | transcription factor 4                                | 3 | 0.0084  | 0.0187  |
| 45 | <i>Pou2f1</i> | POU domain, class 2, transcription factor 1           | 3 | 0.00972 | 0.0201  |
| 46 | <i>Rb1</i>    | retinoblastoma 1                                      | 3 | 0.00972 | 0.0201  |
| 47 | <i>Ctcf</i>   | CCCTC-binding factor                                  | 2 | 0.00985 | 0.0201  |
| 48 | <i>Stat4</i>  | signal transducer and activator of transcription 4    | 2 | 0.00985 | 0.0201  |
| 49 | <i>Hif1a</i>  | hypoxia inducible factor 1, alpha subunit             | 3 | 0.0112  | 0.0223  |
| 50 | <i>Ahr</i>    | aryl-hydrocarbon receptor                             | 3 | 0.0127  | 0.0231  |
| 51 | <i>Gata4</i>  | GATA binding protein 4                                | 3 | 0.0127  | 0.0231  |

|    |               |                                                                                |   |        |        |
|----|---------------|--------------------------------------------------------------------------------|---|--------|--------|
| 52 | <i>Apex1</i>  | apurinic/apyrimidinic endonuclease 1                                           | 2 | 0.0129 | 0.0231 |
| 53 | <i>Dnmt3a</i> | DNA methyltransferase 3A                                                       | 2 | 0.0129 | 0.0231 |
| 54 | <i>Foxg1</i>  | forkhead box G1                                                                | 2 | 0.0129 | 0.0231 |
| 55 | <i>Runx3</i>  | runt related transcription factor 3                                            | 2 | 0.0129 | 0.0231 |
| 56 | <i>Crebbp</i> | CREB binding protein                                                           | 4 | 0.0133 | 0.0233 |
| 57 | <i>Cebpa</i>  | CCAAT/enhancer binding protein (C/EBP), alpha                                  | 3 | 0.0161 | 0.0263 |
| 58 | <i>Foxo3</i>  | forkhead box O3                                                                | 2 | 0.0164 | 0.0263 |
| 59 | <i>Gfi1b</i>  | growth factor independent 1B                                                   | 2 | 0.0164 | 0.0263 |
| 60 | <i>Ncoa3</i>  | nuclear receptor coactivator 3                                                 | 2 | 0.0164 | 0.0263 |
| 61 | <i>Tbx2</i>   | T-box 2                                                                        | 2 | 0.0164 | 0.0263 |
| 62 | <i>Foxa1</i>  | forkhead box A1                                                                | 2 | 0.0202 | 0.0314 |
| 63 | <i>Nfkb2</i>  | nuclear factor of kappa light polypeptide gene enhancer in B cells 2, p49/p100 | 2 | 0.0202 | 0.0314 |
| 64 | <i>Myc</i>    | myelocytomatosis oncogene                                                      | 4 | 0.0242 | 0.0361 |
| 65 | <i>Ncoa1</i>  | nuclear receptor coactivator 1                                                 | 2 | 0.0243 | 0.0361 |
| 66 | <i>Nfic</i>   | nuclear factor I/C                                                             | 2 | 0.0243 | 0.0361 |
| 67 | <i>Myod1</i>  | myogenic differentiation 1                                                     | 4 | 0.0259 | 0.0378 |
| 68 | <i>Esr1</i>   | estrogen receptor 1 (alpha)                                                    | 3 | 0.0268 | 0.0387 |
| 69 | <i>Foxp3</i>  | forkhead box P3                                                                | 2 | 0.0288 | 0.0408 |
| 70 | <i>Creb1</i>  | cAMP responsive element binding protein 1                                      | 3 | 0.032  | 0.0447 |
| 71 | <i>Epas1</i>  | endothelial PAS domain protein 1                                               | 2 | 0.0335 | 0.0449 |
| 72 | <i>Flt1</i>   | Friend leukemia integration 1                                                  | 2 | 0.0335 | 0.0449 |
| 73 | <i>Mybl2</i>  | myeloblastosis oncogene-like 2                                                 | 2 | 0.0335 | 0.0449 |
| 74 | <i>Lef1</i>   | lymphoid enhancer binding factor 1                                             | 3 | 0.0347 | 0.0459 |
| 75 | <i>Etv4</i>   | ets variant 4                                                                  | 2 | 0.0438 | 0.0564 |
| 76 | <i>Gata6</i>  | GATA binding protein 6                                                         | 2 | 0.0438 | 0.0564 |
| 77 | <i>Atf2</i>   | activating transcription factor 2                                              | 2 | 0.0493 | 0.0627 |

Note: data was retrieved from TRRUST (version 2) (<https://www.grnpedia.org/trrust/>)
