# Supplementary material for: Transcriptomics Changes in the Peritoneum of Mice with Lipopolysaccharide-Induced Peritonitis
Source: Int J Mol Sci. 2021 Nov 30;22(23):13008. doi: 10.3390/ijms222313008 (PMC8657704; doi:10.3390/ijms222313008)
Supplement: Supplementary file 1 [file ijms-22-13008-s001.zip › ijms-1473149-supplementary/Supplementary_18_Table S17. Hub Genes Information.pdf]

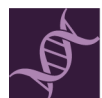

**Table S17.** Hub Genes Information

| Gene name<br>Ensembl ID                                                                 | Species<br>gene type           | Location<br>Length   | Expression<br>Changes<br>(TAK 242 vs. LPS) | Function                                                                                                                                                                                                                                 | Refs [Stelzer, et al. The GeneCards Suite: From Gene Data Mining to Disease Genome Sequence Analyses <i>Curr Protoc Bioinformatics</i> 2016] |
|-----------------------------------------------------------------------------------------|--------------------------------|----------------------|--------------------------------------------|------------------------------------------------------------------------------------------------------------------------------------------------------------------------------------------------------------------------------------------|----------------------------------------------------------------------------------------------------------------------------------------------|
| <i>Sele</i><br>(Selectin E)<br>(ENSEMBL: ENSG00000007908)                               | Mus musculus<br>Protein coding | Chr 1<br>(2,912 bp)  | Down-regulated                             | Is involved in the modulation of inflammation such as blood leukocytes accumulation, cell adhesion, and endothelium adhesion. It is anticipated in the disorders of African Tick-Bite Fever, atherosclerosis, and Rheumatoid Vasculitis. | [Pastwińska, et al. The Art of Mast Cell Adhesion <i>Cells</i> 2020]                                                                         |
| <i>9930111J21Rik2</i><br>(RIKEN cDNA 9930111J21 gene 2)<br>(Ensembl:ENSMUSG00000069892) | Mus musculus<br>Protein coding | Chr 11<br>(2,403 bp) | Down-regulated                             | None available.                                                                                                                                                                                                                          | None                                                                                                                                         |
| <i>Gzmb</i><br>(granzyme B)<br>(Ensembl:ENSMUSG00000015437)                             | Mus musculus<br>Protein coding | Chr 14<br>(1,528 bp) | Down-regulated                             | Involved in wound healing and chronic inflammation and anticipated in the pathology of diseases such as                                                                                                                                  | [Zeglinski and Granville. Granzymes in cardiovascular                                                                                        |

|                                                                                                 |                                |                      |                | Aggressive Nk-Cell Leukemia and<br>Peripheral T-Cell Lymphoma                                                                                                                                                                                              | injury and<br>disease <i>Cellular<br/>Signalling</i> 2020]                                                                                                                                                                                 |
|-------------------------------------------------------------------------------------------------|--------------------------------|----------------------|----------------|------------------------------------------------------------------------------------------------------------------------------------------------------------------------------------------------------------------------------------------------------------|--------------------------------------------------------------------------------------------------------------------------------------------------------------------------------------------------------------------------------------------|
| <i>Lpar3</i><br>(lysophosphatidic acid receptor 3)<br>(Ensembl:ENSMUSG00000036832)              | Mus musculus<br>Protein coding | Chr 3<br>(2,494 bp)  | Down-regulated | Acts as a receptor for lysophosphatidic acid and regulates calcium mobilization. It is involved in the GPCR signaling and peptide ligand-binding receptor pathway. Besides, it is associated with the Tracheal cancer and Trachea Adenoid Cystic Carcinoma | [Lin, et al. A Novel Function of the Lysophosphatidic Acid Receptor 3 (LPAR3) Gene in Zebrafish on Modulating Anxiety, Circadian Rhythm Locomotor Activity, and Short-Term Memory <i>International Journal of Molecular Sciences</i> 2020] |
| <i>Card10</i><br>(caspase recruitment domain family, member 10)<br>(Ensembl:ENSMUSG00000033170) | Mus musculus<br>Protein coding | Chr 15<br>(4,748 bp) | Up-regulated   | Involved in the apoptosis signaling pathway and is associated with diseases such as Primary Open Angle, Open-Angle Glaucoma, and Glaucoma.                                                                                                                 | [Zhang and Lin. CARMA3: Scaffold Protein Involved in NF- $\kappa$ B Signaling <i>Front Immunol</i> 2019]                                                                                                                                   |

|                                                                                                                                  |                                |                      |              |                                                                                                                                    |                                                                                                                                                                                                    |
|----------------------------------------------------------------------------------------------------------------------------------|--------------------------------|----------------------|--------------|------------------------------------------------------------------------------------------------------------------------------------|----------------------------------------------------------------------------------------------------------------------------------------------------------------------------------------------------|
| <i>Plekhh3</i><br>(pleckstrin homology domain containing, family H (with MyTH4 domain) member 3)<br>(Ensembl:ENSMUSG00000035172) | Mus musculus<br>Protein coding | Chr 11<br>(3,007 bp) | Up-regulated | Involved in endothelial tight junction.                                                                                            | [Chen, et al. Genome-wide gene expression array identifies novel genes related to disease severity and excessive daytime sleepiness in patients with obstructive sleep apnea <i>PLoS ONE</i> 2017] |
| <i>Higd1b</i><br>(HIG1 domain family, member 1B)<br>(Ensembl:ENSMUSG00000020928)                                                 | Mus musculus<br>Protein coding | Chr 11<br>(735 bp)   | Up-regulated | Anticipated in the progression of pituitary adenomas and tumorigenesis.                                                            | [Zhou, et al. Identification of Key Genes With Differential Correlations in Lung Adenocarcinoma <i>Front Cell Dev Biol</i> 2021]                                                                   |
| <i>Gm12689</i><br>(predicted gene 12689)<br>(Ensembl: none)                                                                      | Mus musculus<br>Protein coding | Chr 4<br>(792 bp)    | Up-regulated | None available.                                                                                                                    | None                                                                                                                                                                                               |
| <i>Plxdc1</i><br>(plexin domain containing 1)<br>(Ensembl:ENSMUSG00000017417)                                                    | Mus musculus<br>Protein coding | Chr 11<br>(2,922 bp) | Up-regulated | Involved in endothelial cell capillary morphogenesis and diseases such as Osteogenic Sarcoma and Mulchandani-Bhoj-Conlin Syndrome. | [van Beijnum, et al. Tumor endothelium is characterized by                                                                                                                                         |

|                                                                    |                                |                     |              |                                                                                                                                  |                                                                                                          |
|--------------------------------------------------------------------|--------------------------------|---------------------|--------------|----------------------------------------------------------------------------------------------------------------------------------|----------------------------------------------------------------------------------------------------------|
|                                                                    |                                |                     |              |                                                                                                                                  | a matrix remodeling signature <i>Front Biosci (Schol Ed)</i> 2009]                                       |
| <i>Pkn3</i><br>(protein kinase N3)<br>(Ensembl:ENSMUSG00000026785) | Mus musculus<br>Protein coding | Chr 2<br>(2,999 bp) | Up-regulated | Contributes to disorders such as Pachyonychia Congenita 1, malignant prostate cancer, and Gastrointestinal Neuroendocrine Tumor. | [Uehara, et al. Regulation of osteoclast function via Rho-Pkn3-c-Src pathways <i>J Oral Biosci</i> 2019] |
