# Supplementary material for: Transcriptomics Changes in the Peritoneum of Mice with Lipopolysaccharide-Induced Peritonitis
Source: Int J Mol Sci. 2021 Nov 30;22(23):13008. doi: 10.3390/ijms222313008 (PMC8657704; doi:10.3390/ijms222313008)
Supplement: Supplementary file 1 [file ijms-22-13008-s001.zip › ijms-1473149-supplementary/Supplementary_19_Table S18. GO Analysis of Hub Genes.pdf]

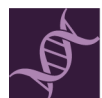

**Table S18.** GO Analysis of Hub Genes

| Gene           | GO analysis [Smith, et al. The mouse Gene Expression Database (GXD): 2019 update <i>Nucleic Acids Research</i> 2019; Bult, et al. Mouse Genome Database (MGD) 2019 <i>Nucleic Acids Research</i> 2019] |
|----------------|--------------------------------------------------------------------------------------------------------------------------------------------------------------------------------------------------------|
| <i>Sele</i>    | MF: carbohydrate derivative binding; signaling receptor activity                                                                                                                                       |
|                | BP: cellular component organization; establishment of localization; immune system process; response to stimulus                                                                                        |
|                | CC: cytoskeleton; extracellular region; non-membrane-bounded organelle; plasma membrane                                                                                                                |
| 9930111J21Rik2 | MF: none                                                                                                                                                                                               |
|                | BP: none                                                                                                                                                                                               |
|                | CC: none                                                                                                                                                                                               |
| <i>Gzmb</i>    | MF: hydrolase                                                                                                                                                                                          |
|                | BP: cell death; immune system process; protein metabolic process; response to stimulus; signaling                                                                                                      |
|                | CC: extracellular region; vacuole                                                                                                                                                                      |
| <i>Lpar3</i>   | MF: lipid binding; signaling receptor activity                                                                                                                                                         |
|                | BP: cell differentiation; cellular component organization; establishment of localization; homeostatic process; response to stimulus; signaling; system development                                     |
|                | CC: cell projection; plasma membrane                                                                                                                                                                   |
| <i>Card10</i>  | MF: none                                                                                                                                                                                               |
|                | BP: cell death; protein metabolic process; response to stimulus; signaling; system development                                                                                                         |

|                |                                                                |
|----------------|----------------------------------------------------------------|
|                | CC: none                                                       |
| <i>Plekhh3</i> | MF: none                                                       |
|                | BP: response to stimulus; signaling; system development        |
|                | CC: on-membrane-bounded organelle                              |
|                |                                                                |
| <i>Higd1b</i>  | MF: none                                                       |
|                | BP: cellular component organization                            |
|                | CC: mitochondrion                                              |
| <i>Gm12689</i> | MF: none                                                       |
|                | BP: none                                                       |
|                | CC: none                                                       |
| <i>Plxdc1</i>  | MF: none                                                       |
|                | BP: system development                                         |
|                | CC: cell projection; plasma membrane                           |
| <i>Pkn3</i>    | MF: carbohydrate derivative binding; transferase               |
|                | BP: protein metabolic process; response to stimulus; signaling |
|                | CC: nucleus                                                    |

Note: data were obtained from the Mouse Genome Database (MGD) at the Mouse Genome Informatics website (URL: <http://www.informatics.jax.org>) [Smith, et al. The mouse Gene Expression Database (GXD): 2019 update *Nucleic Acids Research* 2019; Bult, et al. Mouse Genome Database (MGD) 2019 *Nucleic Acids Research* 2019] [date of retrieving data: August 23, 2021]
