# Supplementary material for: Transcriptomics Changes in the Peritoneum of Mice with Lipopolysaccharide-Induced Peritonitis
Source: Int J Mol Sci. 2021 Nov 30;22(23):13008. doi: 10.3390/ijms222313008 (PMC8657704; doi:10.3390/ijms222313008)
Supplement: Supplementary file 1 [file ijms-22-13008-s001.zip › ijms-1473149-supplementary/Supplementary_20_Table S19. Protein modeling templates.pdf]

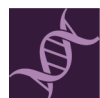

**Table S19.** Protein modeling templates

| Proteins       | Species      | Length (a.a) | Templates (query cover, identify) |
|----------------|--------------|--------------|-----------------------------------|
| SELE           | Mus musculus | 619          | 4C16_A (1.93 Å) (85%, 76.16%)     |
|                |              |              | 6V06_A (2.40 Å) (46%, 29.60%)     |
|                |              |              | 1C1Z_A (2.87 Å) (46%, 29.60%)     |
| 9930111J21RIK2 | Mus musculus | 467          | 7C3K_A (2.60 Å) (85%, 48.66%)     |
|                |              |              | 1TQD_A (2.30 Å) (85%, 44.63%)     |
|                |              |              | 1TQ6_A (2.70 Å) (85%, 44.63%)     |
| GZMB           | Mus musculus | 247          | 1FI8_A (2.20 Å) (91%, 80.70%)     |
|                |              |              | 1IAU_A (2.00 Å) (91%, 70.22%)     |
|                |              |              | 3G01_A (2.50 Å) (91%, 68.14%)     |
| LPAR3          | Mus musculus | 354          | 4Z36_A (2.90 Å) (84%, 55.56%)     |
|                |              |              | 7AUE_R (2.97 Å) (75%, 29.02%)     |
|                |              |              | 6K41_R (2.90 Å) (76%, 28.23%)     |
| CARD10         | Mus musculus | 1070         | <i>De novo</i> by Rosetta         |
| PLEKHH3        | Mus musculus | 796          | <i>De novo</i> by Rosetta         |
| HIGD1B         | Mus musculus | 98           | <i>De novo</i> by Rosetta         |
| GM12689        | Mus musculus | 117          | <i>De novo</i> by Rosetta         |
| PLXDC1         | Mus musculus | 507          | <i>De novo</i> by Rosetta         |
| PKN3           | Mus musculus | 878          | 4OTD_A (2.00 Å) (37%, 65.17%)     |
|                |              |              | 4CRS_A (2.75 Å) (37%, 63.33%)     |
|                |              |              | 1O6L_A (1.60 Å) (37%, 44.64%)     |
