# Supplementary material for: Transcriptomics Changes in the Peritoneum of Mice with Lipopolysaccharide-Induced Peritonitis
Source: Int J Mol Sci. 2021 Nov 30;22(23):13008. doi: 10.3390/ijms222313008 (PMC8657704; doi:10.3390/ijms222313008)
Supplement: Supplementary file 1 [file ijms-22-13008-s001.zip › ijms-1473149-supplementary/Supplementary_21_Table S20. Ramachandran plot of hub proteins.pdf]

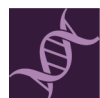

**Table S20.** Ramachandran plot of hub proteins

| Proteins       | Residues in most favored regions | Residues in additional allowed regions | Residues in generously allowed regions | Residues in disallowed regions |
|----------------|----------------------------------|----------------------------------------|----------------------------------------|--------------------------------|
| SELE           | 378/475 (79.6%)                  | 73/475 (15.4%)                         | 15/475 (3.2%)                          | 9/475 (1.9%)                   |
| 9930111J21RIK2 | 362/401 (90.3%)                  | 31/401 (7.7%)                          | 4/401 (1.0%)                           | 4/401 (1.0%)                   |
| GZMB           | 167/184 (90.8%)                  | 14/184 (7.6%)                          | 3/184 (1.6%)                           | 0/184 (0.0%)                   |
| LPAR3          | 287/317 (90.5%)                  | 26/317 (8.2%)                          | 4/317 (1.3%)                           | 0/317 (0.0%)                   |
| CARD10         | 313/387 (80.9%)                  | 62/387 (16.0%)                         | 7/387 (1.8%)                           | 5/387 (1.3%)                   |
| PLEKHH3        | 551/611 (90.2%)                  | 50/611 (8.2%)                          | 4/611 (0.7%)                           | 6/611 (1.0%)                   |
| HIGD1B         | 84/85 (98.8%)                    | 1/85 (1.2%)                            | 0/85 (0.0%)                            | 0/85 (0.0%)                    |
| GM12689        | 70/89 (78.7%)                    | 12/89 (13.5%)                          | 4/89 (4.5%)                            | 3/89 (3.4%)                    |
| PLXDC1         | 359/415 (86.5%)                  | 50/415 (12.0%)                         | 2/415 (0.5%)                           | 4/415 (1.0%)                   |
| PKN3           | 428/555 (77.1%)                  | 89/555 (16.0%)                         | 24/555 (4.3%)                          | 14/555 (2.5%)                  |

Note: random coil parts of the N-terminal/C-terminal sequence of the hub proteins were deleted for molecular dynamics simulation.
