# Supplementary material for: Transcriptomics Changes in the Peritoneum of Mice with Lipopolysaccharide-Induced Peritonitis
Source: Int J Mol Sci. 2021 Nov 30;22(23):13008. doi: 10.3390/ijms222313008 (PMC8657704; doi:10.3390/ijms222313008)
Supplement: Supplementary file 1 [file ijms-22-13008-s001.zip › ijms-1473149-supplementary/Supplementary_22_Table S21. Primers for qPCR.pdf]

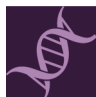

**Table S21.** Primers for qPCR

| Genes                 |         | Sequences (5' to 3')      | Product (bp) |
|-----------------------|---------|---------------------------|--------------|
| <i>GAPDH</i>          | Forward | GGCAAATTCAACGGCACAGTCAAG  | 81           |
|                       | Reverse | TCGCTCCTGGAAGATGGTGATGG   |              |
| <i>Sele</i>           | Forward | TTGCTCTACTTGTTGATG        | 143          |
|                       | Reverse | CATTTGTGTTCCCTGATTG       |              |
| <i>9930111J21Rik2</i> | Forward | ATTGACACGGTTGCGAGCGATG    | 125          |
|                       | Reverse | GGAAACACTTTGCCACGGACTC    |              |
| <i>Gzmb</i>           | Forward | AGCATCTCTATTTACAGCGGGAACG | 144          |
|                       | Reverse | GGAGCACCATCCGATGACAAGC    |              |
| <i>Lpar3</i>          | Forward | GCTCCCATTTACAGTAGGAGTT    | 101          |
|                       | Reverse | ACATACATGTAGATGCGTACGT    |              |
| <i>Card10</i>         | Forward | CGAACGCTGCTGAAGGACTGTG    | 96           |
|                       | Reverse | GATTGCCTGGTCCCGCTCTTTC    |              |
| <i>Plekhh3</i>        | Forward | GACTAAGCCTGCCAAGAG        | 79           |
|                       | Reverse | TGGTTGCCTCAAATCTCAG       |              |
| <i>Higd1b</i>         | Forward | TGTCCAAGAAGTTCCTAAG       | 88           |
|                       | Reverse | ATCCTGTATGCTGCTATC        |              |
| <i>Gm12689</i>        | Forward | GCACAGACAATTACAATG        | 114          |
|                       | Reverse | CCTCTAAGTACAGTGATTC       |              |
| <i>Plxdc1</i>         | Forward | TTAATGGCGACTCCACTAC       | 76           |
|                       | Reverse | GGATTCAACTTGGTGTCATC      |              |
| <i>Pkn3</i>           | Forward | AGGCGTTGAAGAAGCAGGAAGTG   | 120          |
|                       | Reverse | AGGCAAGGAGAGAGAGCAGGAAG   |              |
