# Supplementary material for: Transcriptomics Changes in the Peritoneum of Mice with Lipopolysaccharide-Induced Peritonitis
Source: Int J Mol Sci. 2021 Nov 30;22(23):13008. doi: 10.3390/ijms222313008 (PMC8657704; doi:10.3390/ijms222313008)
Supplement: Supplementary file 1 [file ijms-22-13008-s001.zip › ijms-1473149-supplementary/Supplementary_23_Table S22 RMSD-RMSF-Rg.pdf]

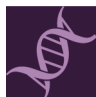

**Table S23. Mean value of RMSD, RMSF, and Rg**

| Protein        | RMSD   | RMSF   | Rg     |
|----------------|--------|--------|--------|
| SELE           | 2.315  | 1.298  | 3.861  |
| 9930111J21RIK2 | 0.9725 | 0.3550 | 0.9725 |
| GZMB           | 0.2803 | 0.1658 | 1.707  |
| LPAR3          | 0.9497 | 0.3541 | 2.425  |
| CARD10         | 1.823  | 0.8103 | 2.937  |
| PLEKHH3        | 1.534  | 0.6020 | 3.253  |
| HIGD1B         | 0.9055 | 0.3621 | 2.070  |
| GM12689        | 0.6669 | 0.3518 | 1.474  |
| PLXDC1         | 2.207  | 0.6737 | 2.580  |
| PKN3           | 1.035  | 0.3919 | 2.791  |
