# Supplementary material for: Transcriptomics Changes in the Peritoneum of Mice with Lipopolysaccharide-Induced Peritonitis
Source: Int J Mol Sci. 2021 Nov 30;22(23):13008. doi: 10.3390/ijms222313008 (PMC8657704; doi:10.3390/ijms222313008)
Supplement: Supplementary file 1 [file ijms-22-13008-s001.zip › ijms-1473149-supplementary/Supplementary_S1 DEGs_all.xlsx]

## Sheet: LPSvsCtrl_deg_all
gene_id	LPS_1_P	LPS_2_P	LPS_3_P	LPS_4_P	LPS_5_P	LPS_6_P	Ctrl_1_P	Ctrl_2_P	Ctrl_3_P	Ctrl_4_P	Ctrl_5_P	Ctrl_6_P	LPS_P	Ctrl_P	log2FoldChange	pvalue	padj	gene_name	gene_chr	gene_start	gene_end	gene_strand	gene_length	gene_biotype	gene_description	tf_family
ENSMUSG00000031765	188401	181671	245476	266029	216707	290391	1349.64	1780.93	1754.79	1987.13	1956.92	2630.93	231446	1910.06	6.92097	0	0	Mt1	8	94179082	94180327	+	1246	protein_coding	metallothionein 1 [Source:MGI Symbol;Acc:MGI:97171]	-
ENSMUSG00000011008	2461.69	3277.44	3219.23	2754.91	2886.82	3959.9	21.328	42.0557	30.4679	37.317	23.3931	31.8514	3093.33	31.0689	6.6349	2.0038e-254	2.29825e-250	Mcoln2	3	146149833	146195513	+	3288	protein_coding	mucolipin 2 [Source:MGI Symbol;Acc:MGI:1915529]	-
ENSMUSG00000026822	51773.5	47158.7	49514.2	43738.6	40766.1	48174.6	43.5091	51.4968	121.048	96.4023	35.0896	41.8618	46854.3	64.9013	9.49245	1.80991e-253	1.38392e-249	Lcn2	2	32384633	32388252	-	2623	protein_coding	lipocalin 2 [Source:MGI Symbol;Acc:MGI:96757]	-
ENSMUSG00000074115	3210.52	3451.47	5149.48	3740.95	3369.2	4140.93	10.2374	21.457	7.41111	8.55182	10.7968	8.19036	3843.76	11.1074	8.43769	3.60189e-244	2.06559e-240	Saa1	7	46740497	46742980	-	2478	protein_coding	serum amyloid A 1 [Source:MGI Symbol;Acc:MGI:98221]	-
ENSMUSG00000040026	144205	135052	148315	142109	106560	192821	48.6278	60.9379	108.696	63.7499	16.1952	22.751	144844	53.493	11.4002	9.72542e-233	4.46183e-229	Saa3	7	46711998	46715700	-	2606	protein_coding	serum amyloid A 3 [Source:MGI Symbol;Acc:MGI:98223]	-
ENSMUSG00000027832	67467.8	120854	65232.3	57972.9	57864.5	81322.5	533.2	430.857	329.383	244.893	524.544	358.556	75119	403.572	7.54052	1.50043e-215	5.73639e-212	Ptx3	3	66219910	66225805	+	2682	protein_coding	pentraxin related gene [Source:MGI Symbol;Acc:MGI:104641]	-
ENSMUSG00000000204	2864.84	5144.51	3851.46	2758.82	4694.51	4553.08	11.9437	6.86624	11.5284	10.8841	18.8944	17.2908	3977.87	12.9013	8.27577	7.27435e-214	2.38381e-210	Slfn4	11	83175186	83190216	+	3964	protein_coding	schlafen 4 [Source:MGI Symbol;Acc:MGI:1329010]	-
ENSMUSG00000029380	22504.8	20629.4	29056.9	17636.6	18315.5	33382.4	7.67808	20.5987	14.8222	3.88719	9.89706	30.0313	23587.6	14.4858	10.6777	6.14931e-207	1.76324e-203	Cxcl1	5	90891241	90893115	+	1875	protein_coding	chemokine (C-X-C motif) ligand 1 [Source:MGI Symbol;Acc:MGI:108068]	-
ENSMUSG00000061878	3336.14	4161.68	2866.98	4302.35	3147.91	4114.74	28.153	30.8981	37.0556	38.0945	61.1819	23.661	3654.97	36.5073	6.64611	1.4147e-205	3.60575e-202	Sphk1	11	116530925	116536674	+	4774	protein_coding	sphingosine kinase 1 [Source:MGI Symbol;Acc:MGI:1316649]	-
ENSMUSG00000087006	3628.27	3268.39	3580.51	3781.33	3442.56	2553.78	114.318	52.3551	84.8161	83.1858	91.7728	80.0835	3375.8	84.4219	5.32144	4.65924e-200	1.06878e-196	Gm13889	2	93955810	93957201	-	1392	protein_coding	predicted gene 13889 [Source:MGI Symbol;Acc:MGI:3652053]	-
ENSMUSG00000022094	14285.2	13633.9	9211.25	11652.7	11445.3	10314.2	356.604	405.108	318.678	280.655	240.229	215.68	11757.1	302.826	5.27861	6.2032e-186	1.29359e-182	Slc39a14	14	70303469	70351425	-	10550	protein_coding	solute carrier family 39 (zinc transporter), member 14 [Source:MGI Symbol;Acc:MGI:2384851]	-
ENSMUSG00000029417	29006.7	24796.1	27481.5	10667.9	16929.3	26425.9	88.7245	89.2611	65.8766	65.3048	76.4773	149.247	22551.2	89.1485	7.98421	1.09071e-184	2.08497e-181	Cxcl9	5	92321347	92328079	-	3016	protein_coding	chemokine (C-X-C motif) ligand 9 [Source:MGI Symbol;Acc:MGI:1352449]	-
ENSMUSG00000031762	1482.08	1749.38	2308.3	2085.4	1856.17	2222.46	2.55936	3.43312	4.11728	6.99694	8.0976	3.64016	1950.63	4.80741	8.66037	2.13709e-183	3.77097e-180	Mt2	8	94172664	94173568	+	588	protein_coding	metallothionein 2 [Source:MGI Symbol;Acc:MGI:97172]	-
ENSMUSG00000026981	7077.37	8934.99	4757.23	3344.97	3931.15	8249.97	8.5312	12.0159	9.88148	17.1036	11.6965	12.7406	6049.28	11.9949	8.97534	9.81825e-183	1.60872e-179	Il1rn	2	24336853	24351494	+	5535	protein_coding	interleukin 1 receptor antagonist [Source:MGI Symbol;Acc:MGI:96547]	-
ENSMUSG00000025746	4160.93	3818.65	5223.02	3196.48	3553.2	4325.37	5.11872	2.57484	3.29383	1.55488	0	3.64016	4046.27	2.69707	10.5515	8.47704e-175	1.29637e-171	Il6	5	30013114	30019981	+	2428	protein_coding	interleukin 6 [Source:MGI Symbol;Acc:MGI:96559]	-
ENSMUSG00000024663	68.164	65.3878	58.0622	62.5228	43.5137	63.7591	805.345	905.486	939.564	929.816	779.169	940.982	60.2349	883.394	-3.86775	1.51994e-168	2.17912e-165	Rab3il1	19	10001669	10038380	+	4543	protein_coding	RAB3A interacting protein (rabin3)-like 1 [Source:MGI Symbol;Acc:MGI:1922010]	-
ENSMUSG00000058427	4881.52	4854.79	6945.53	4982.28	5301.21	7207.06	0	0	3.29383	3.10975	3.59893	1.82008	5695.4	1.97043	11.4868	5.35597e-159	7.2271e-156	Cxcl2	5	90903871	90905938	+	2068	protein_coding	chemokine (C-X-C motif) ligand 2 [Source:MGI Symbol;Acc:MGI:1340094]	-
ENSMUSG00000024539	1946.57	1828.85	2314.75	2051.53	2107.31	2176.92	331.011	290.957	366.438	334.298	341.899	339.445	2070.99	334.008	2.6319	4.59929e-157	5.86129e-154	Ptpn2	18	67665511	67724595	-	3125	protein_coding	protein tyrosine phosphatase, non-receptor type 2 [Source:MGI Symbol;Acc:MGI:97806]	-
ENSMUSG00000044786	6001.35	5426.18	7388.1	6766.79	6652.62	5913.66	536.613	624.828	570.656	569.862	694.594	762.614	6358.12	626.528	3.34347	8.87652e-154	1.07168e-150	Zfp36	7	28376784	28380253	-	3470	protein_coding	zinc finger protein 36 [Source:MGI Symbol;Acc:MGI:99180]	-
ENSMUSG00000037447	3290.37	3218.09	4161.13	3343.67	3637.75	2849.8	214.986	236.027	256.095	171.814	289.714	235.7	3416.8	234.056	3.86851	5.78159e-152	6.63119e-149	Arid5a	1	36307733	36324029	+	12540	protein_coding	AT rich interactive domain 5A (MRF1-like) [Source:MGI Symbol;Acc:MGI:2443039]	ARID
ENSMUSG00000035385	15249.3	15552.2	14901.4	7768.45	9308.2	21217	58.0122	75.5287	100.462	61.4176	145.757	105.565	13999.4	91.1236	7.2646	1.10033e-143	1.20193e-140	Ccl2	11	82035571	82037453	+	1138	protein_coding	chemokine (C-C motif) ligand 2 [Source:MGI Symbol;Acc:MGI:98259]	-
ENSMUSG00000033213	855.945	681.039	1020.61	954.775	753.409	845.947	8.5312	6.86624	4.11728	3.10975	3.59893	3.64016	851.953	4.97726	7.42136	1.02157e-141	1.06518e-138	AA467197	2	122636986	122641191	+	1203	protein_coding	expressed sequence AA467197 [Source:MGI Symbol;Acc:MGI:3034182]	-
ENSMUSG00000035673	8210.84	8477.28	6322.33	5688.27	6744.62	6478.38	402.673	430.857	628.298	468.795	401.281	473.221	6986.95	467.521	3.90143	3.83368e-139	3.82351e-136	Sbno2	10	80056992	80105571	-	10715	protein_coding	strawberry notch 2 [Source:MGI Symbol;Acc:MGI:2448490]	-
ENSMUSG00000019850	10062	11601.8	9465.44	5683.06	6870.19	11721.4	237.167	139.041	162.221	212.241	122.364	142.876	9233.98	169.318	5.76846	7.04116e-139	6.72989e-136	Tnfaip3	10	19000910	19015657	-	7226	protein_coding	tumor necrosis factor, alpha-induced protein 3 [Source:MGI Symbol;Acc:MGI:1196377]	-
ENSMUSG00000054855	14278.4	12592.7	10804.7	7147.13	8196.74	24097.5	81.0464	76.3869	80.6988	46.6463	51.2848	35.4916	12852.9	61.9258	7.69679	2.77061e-136	2.5422e-133	Rnd1	15	98663421	98677461	-	2967	protein_coding	Rho family GTPase 1 [Source:MGI Symbol;Acc:MGI:2444878]	-
ENSMUSG00000046688	4340.1	3759.3	4108.23	2765.33	3616.61	5994.49	173.183	227.444	181.984	196.692	187.144	195.659	4097.34	193.684	4.40301	1.52438e-131	1.34491e-128	Tifa	3	127789805	127832164	+	3199	protein_coding	TRAF-interacting protein with forkhead-associated domain [Source:MGI Symbol;Acc:MGI:2182965]	-
ENSMUSG00000024737	2596.08	3379.04	2176.69	1418.49	1675.9	3008.06	31.5654	40.3392	44.4667	48.2011	28.7915	38.2217	2375.71	38.5976	5.94166	5.23091e-130	4.44414e-127	Slc15a3	19	10839727	10859362	+	5491	protein_coding	solute carrier family 15, member 3 [Source:MGI Symbol;Acc:MGI:1929691]	-
ENSMUSG00000052837	10529.4	8700.6	10678.3	9285.93	9759.5	7901.57	483.719	581.914	657.942	648.383	388.685	364.926	9475.88	520.928	4.18454	7.43888e-126	6.0943e-123	Junb	8	84974484	84978718	-	2301	protein_coding	jun B proto-oncogene [Source:MGI Symbol;Acc:MGI:96647]	TF_bZIP
ENSMUSG00000056054	1340.88	1727.24	1011.57	1530.51	1191.03	1272.9	18.7686	27.465	9.88148	14.7713	35.0896	25.4811	1345.69	21.9095	5.94873	3.13876e-122	2.48276e-119	S100a8	3	90668978	90670035	+	694	protein_coding	S100 calcium binding protein A8 (calgranulin A) [Source:MGI Symbol;Acc:MGI:88244]	-
ENSMUSG00000032515	2134.51	1957.61	2211.53	1818.37	1955.63	2587.94	170.624	180.239	214.099	252.667	154.754	160.167	2110.93	188.758	3.48168	3.3646e-112	2.57269e-109	Csrnp1	9	119971163	119984658	-	3473	protein_coding	cysteine-serine-rich nuclear protein 1 [Source:MGI Symbol;Acc:MGI:2387989]	-
novel.272	813.099	661.926	753.519	458.5	768.328	786.742	12.7968	21.457	28.821	27.2103	17.0949	24.5711	707.019	21.9919	5.00324	1.8161e-110	1.34385e-107	-	2	84898645	84908112	+	4129	-	- && P21415.2 RecName: Full=Envelope glycoprotein; AltName: Full=Env polyprotein; Contains: RecName: Full=Surface protein; Short=SU; AltName: Full=Glycoprotein 70; Short=gp70; Contains: RecName: Full=Transmembrane protein; Short=TM; AltName: Full=Envelope	-
ENSMUSG00000035692	9352.1	10843.3	7499.06	3888.14	5701.54	11260.3	87.8714	120.159	163.868	157.82	134.96	164.717	8090.74	138.233	5.87104	1.09638e-108	7.85932e-106	Isg15	4	156199424	156200818	-	756	protein_coding	ISG15 ubiquitin-like modifier [Source:MGI Symbol;Acc:MGI:1855694]	-
ENSMUSG00000023067	4919.49	5458.37	4708.2	7350.33	4710.67	3642.24	245.699	271.217	355.733	281.432	331.102	377.667	5131.55	310.475	4.04707	8.06646e-108	5.60716e-105	Cdkn1a	17	29090976	29100727	+	3553	protein_coding	cyclin-dependent kinase inhibitor 1A (P21) [Source:MGI Symbol;Acc:MGI:104556]	-
ENSMUSG00000007039	125.617	118.704	78.7066	101.6	70.8652	99.0543	1041.66	1196.44	1517.63	1421.93	1309.11	1463.34	99.091	1325.02	-3.73458	2.34811e-106	1.58422e-103	Ddah2	17	35059035	35062095	+	1593	protein_coding	dimethylarginine dimethylaminohydrolase 2 [Source:MGI Symbol;Acc:MGI:1859016]	-
ENSMUSG00000035042	5386.9	6463.33	6447.49	3786.54	4096.5	7499.66	10.2374	14.5908	32.1148	9.32925	10.7968	47.3221	5613.41	20.7319	8.08488	7.29245e-106	4.77947e-103	Ccl5	11	83525778	83530518	-	960	protein_coding	chemokine (C-C motif) ligand 5 [Source:MGI Symbol;Acc:MGI:98262]	-
ENSMUSG00000056071	1130.55	1659.84	868.353	1396.34	1106.49	1036.09	29.8592	17.1656	9.88148	10.1067	20.6939	27.3012	1199.61	19.168	5.97547	1.62201e-105	1.03354e-102	S100a9	3	90692632	90695721	-	522	protein_coding	S100 calcium binding protein A9 (calgranulin B) [Source:MGI Symbol;Acc:MGI:1338947]	-
ENSMUSG00000034041	14.6066	22.1313	20.6444	19.5384	13.6757	14.8012	349.779	437.723	499.015	449.359	370.69	470.491	17.5663	429.509	-4.6138	1.91411e-105	1.18426e-102	Lyl1	8	84701457	84704715	+	1800	protein_coding	lymphoblastomic leukemia 1 [Source:MGI Symbol;Acc:MGI:96891]	bHLH
ENSMUSG00000043091	3464.68	3584.26	3196	3849.06	3011.15	4838.86	322.479	374.21	478.428	379.39	365.292	406.788	3657.33	387.765	3.23747	1.96181e-105	1.18426e-102	Tuba1c	15	99029891	99038110	+	2287	protein_coding	tubulin, alpha 1C [Source:MGI Symbol;Acc:MGI:1095409]	-
ENSMUSG00000020407	2168.59	1744.35	1905.73	1828.79	1629.9	1530.22	5.11872	7.72452	12.3519	10.1067	32.3904	22.751	1801.26	15.0739	6.91104	3.06975e-105	1.80556e-102	Upp1	11	9118103	9136170	+	1961	protein_coding	uridine phosphorylase 1 [Source:MGI Symbol;Acc:MGI:1097668]	-
ENSMUSG00000028525	15017.5	13046.4	16409.7	15006.8	14651.7	11001.9	1291.62	1436.76	1188.25	1171.6	1577.23	1862.85	14189	1421.39	3.31959	5.4266e-105	3.11202e-102	Pde4b	4	102087543	102607259	+	10560	protein_coding	phosphodiesterase 4B, cAMP specific [Source:MGI Symbol;Acc:MGI:99557]	-
ENSMUSG00000042349	1269.8	1438.53	1286.4	1301.26	1273.09	1768.18	104.081	110.718	145.752	170.259	116.066	133.776	1389.54	130.109	3.41542	6.83758e-105	3.82554e-102	Ikbke	1	131254343	131279606	-	9018	protein_coding	inhibitor of kappaB kinase epsilon [Source:MGI Symbol;Acc:MGI:1929612]	-
ENSMUSG00000020641	17562	28623.8	12571.1	6099.88	10751.6	24664.5	88.7245	98.7022	74.9346	85.5182	105.269	167.447	16712.1	103.433	7.33687	8.46516e-105	4.62339e-102	Rsad2	12	26442746	26456452	-	4335	protein_coding	radical S-adenosyl methionine domain containing 2 [Source:MGI Symbol;Acc:MGI:1929628]	-
ENSMUSG00000031880	2780.12	4327.67	4029.52	2379.77	3938.61	2499.13	154.415	74.6704	129.283	96.4023	108.868	82.8137	3325.8	107.742	4.94772	9.85555e-105	5.25759e-102	Rrad	8	104628070	104631327	-	1577	protein_coding	Ras-related associated with diabetes [Source:MGI Symbol;Acc:MGI:1930943]	-
ENSMUSG00000022952	1136.39	1098.52	899.32	874.016	957.301	1171.57	129.674	133.892	154.81	125.945	138.559	167.447	1022.85	141.721	2.85318	4.25114e-104	2.21629e-101	Runx1	16	92601466	92826149	-	12025	protein_coding	runt related transcription factor 1 [Source:MGI Symbol;Acc:MGI:99852]	Runt
ENSMUSG00000031504	691.378	654.884	726.423	600.479	672.597	825.453	55.4528	53.2134	37.0556	32.6524	38.6885	23.661	695.202	40.1206	4.11453	3.05207e-102	1.55581e-99	Rab20	8	11453518	11478710	-	1392	protein_coding	RAB20, member RAS oncogene family [Source:MGI Symbol;Acc:MGI:102789]	-
ENSMUSG00000037321	8121.26	7796.24	7635.83	5190.69	5612.02	11097.5	338.689	384.51	456.195	456.356	297.812	404.058	7575.59	389.603	4.28105	5.57355e-102	2.77938e-99	Tap1	17	34187553	34197225	+	5476	protein_coding	transporter 1, ATP-binding cassette, sub-family B (MDR/TAP) [Source:MGI Symbol;Acc:MGI:98483]	-
ENSMUSG00000066363	3573.74	3893.09	2993.43	1156.67	1566.49	1853.57	2.55936	1.71656	4.94074	0.777438	5.3984	5.46024	2506.17	3.47546	9.51181	1.25105e-100	6.1059e-98	Serpina3f	12	104214544	104221129	+	2290	protein_coding	serine (or cysteine) peptidase inhibitor, clade A, member 3F [Source:MGI Symbol;Acc:MGI:2182838]	-
ENSMUSG00000104713	3428.65	3042.04	2736.67	1326	1936.98	4002.02	46.9216	50.6385	69.9938	66.0822	34.1899	50.0522	2745.39	52.9797	5.69368	8.97384e-97	4.28856e-94	Gbp6	5	105270702	105293698	-	5954	protein_coding	guanylate binding protein 6 [Source:MGI Symbol;Acc:MGI:2140937]	-
ENSMUSG00000057465	2065.37	1883.17	3085.04	2147.92	1801.47	2179.2	0	3.43312	0	0	3.59893	0.91004	2193.69	1.32368	10.7422	3.98017e-95	1.86329e-92	Saa2	7	46751790	46754313	+	2518	protein_coding	serum amyloid A 2 [Source:MGI Symbol;Acc:MGI:98222]	-
ENSMUSG00000023341	1302.91	2196.02	1918.63	974.313	1806.44	2117.71	23.0342	38.6226	9.05803	24.878	33.2901	30.0313	1719.34	26.4857	6.02356	6.76617e-94	3.10418e-91	Mx2	16	97535308	97560900	+	3614	polymorphic_pseudogene	MX dynamin-like GTPase 2 [Source:MGI Symbol;Acc:MGI:97244]	-
ENSMUSG00000035373	14616.3	13773.7	16861.3	7089.82	9742.1	31105.3	86.1651	104.71	183.631	181.143	172.749	193.839	15531.4	153.706	6.65888	4.26875e-91	1.92002e-88	Ccl7	11	82045712	82047525	+	801	protein_coding	chemokine (C-C motif) ligand 7 [Source:MGI Symbol;Acc:MGI:99512]	-
ENSMUSG00000027368	705.984	1027.09	816.742	438.962	657.678	892.627	26.4467	17.1656	13.9988	15.5488	21.5936	8.19036	756.514	17.1573	5.46242	4.62411e-88	2.03986e-85	Dusp2	2	127336159	127338376	+	2003	protein_coding	dual specificity phosphatase 2 [Source:MGI Symbol;Acc:MGI:101911]	-
ENSMUSG00000031779	359.322	339.011	379.34	380.347	277.244	321.073	3.41248	4.2914	7.41111	11.6616	11.6965	16.3807	342.723	9.1423	5.23492	8.26063e-88	3.57529e-85	Ccl22	8	94745590	94751699	+	2325	protein_coding	chemokine (C-C motif) ligand 22 [Source:MGI Symbol;Acc:MGI:1306779]	-
ENSMUSG00000053113	11807	12057.5	11033.1	8410.62	8220.36	12602.7	313.948	327.005	583.831	685.7	333.801	536.924	10688.5	463.535	4.52693	1.12849e-86	4.79377e-84	Socs3	11	117966079	117970047	-	2891	protein_coding	suppressor of cytokine signaling 3 [Source:MGI Symbol;Acc:MGI:1201791]	-
ENSMUSG00000046031	1894.96	2524.98	2096.69	801.073	956.058	2675.61	11.0906	22.3153	28.821	20.2134	17.9947	18.2008	1824.89	19.7726	6.52677	1.44482e-85	6.02595e-83	Calhm6	10	34126067	34127984	-	1094	protein_coding	calcium homeostasis modulator family member 6 [Source:MGI Symbol;Acc:MGI:2443082]	-
ENSMUSG00000041827	3754.86	5460.39	3553.41	1860.05	2868.17	5139.44	50.3341	71.2373	83.1692	80.8535	26.0923	56.4225	3772.72	61.3515	5.94062	2.12079e-85	8.68729e-83	Oasl1	5	114923240	114937915	+	2608	protein_coding	2'-5' oligoadenylate synthetase-like 1 [Source:MGI Symbol;Acc:MGI:2180849]	-
ENSMUSG00000030790	3840.56	5113.33	2888.92	2609.02	2624.5	4298.05	135.646	171.656	207.511	229.344	231.231	212.949	3562.39	198.056	4.16901	2.48297e-85	9.99245e-83	Adm	7	110627661	110629820	+	1619	protein_coding	adrenomedullin [Source:MGI Symbol;Acc:MGI:108058]	-
ENSMUSG00000021025	12195.5	14023.2	9971.22	8650.29	10095.2	16083.2	997.297	1078	1096.84	1320.09	859.245	1186.69	11836.4	1089.69	3.44119	1.8722e-84	7.40453e-82	Nfkbia	12	55489410	55492647	-	1610	protein_coding	nuclear factor of kappa light polypeptide gene enhancer in B cells inhibitor, alpha [Source:MGI Symbol;Acc:MGI:104741]	-
ENSMUSG00000075010	8764.92	10443.9	9821.55	6032.15	7054.19	11848.9	732.83	805.067	747.699	723.795	823.256	1024.71	8994.28	809.559	3.47401	3.84863e-83	1.49634e-80	AW112010	19	11047617	11050566	-	770	lincRNA	expressed sequence AW112010 [Source:MGI Symbol;Acc:MGI:2147706]	-
ENSMUSG00000034855	61653.4	52054.7	54259.8	20429.3	41599.1	116142	58.8653	30.0398	208.335	216.905	73.7781	57.3325	57689.7	107.543	9.06622	4.80572e-83	1.83731e-80	Cxcl10	5	92346638	92348889	-	2252	protein_coding	chemokine (C-X-C motif) ligand 10 [Source:MGI Symbol;Acc:MGI:1352450]	-
ENSMUSG00000023206	2947.61	3754.27	3301.81	3126.14	2884.34	3701.44	435.944	448.022	327.736	359.176	447.167	574.235	3285.93	432.047	2.92776	5.3016e-83	1.99366e-80	Il15ra	2	11705290	11734317	+	4446	protein_coding	interleukin 15 receptor, alpha chain [Source:MGI Symbol;Acc:MGI:104644]	-
ENSMUSG00000030142	1984.55	1997.85	1016.73	748.971	870.274	1995.89	10.2374	14.5908	9.05803	5.44206	1.79947	7.28032	1435.71	8.06801	7.47397	5.43267e-83	2.01e-80	Clec4e	6	123281789	123289870	-	4965	protein_coding	C-type lectin domain family 4, member e [Source:MGI Symbol;Acc:MGI:1861232]	-
ENSMUSG00000027513	48.6886	87.5191	38.7082	27.3537	53.4597	36.4338	4467.79	6948.64	2506.6	5250.04	2163.86	3028.61	48.6938	4060.92	-6.37627	2.82012e-81	1.02684e-78	Pck1	2	173153048	173159273	+	3429	protein_coding	phosphoenolpyruvate carboxykinase 1, cytosolic [Source:MGI Symbol;Acc:MGI:97501]	-
ENSMUSG00000021109	9798.09	9349.45	6888.76	6365.6	6183.92	10602.2	852.267	840.256	892.627	1028.55	916.828	750.783	8198.01	880.219	3.21931	1.1631e-80	4.16879e-78	Hif1a	12	73901375	73947530	+	5896	protein_coding	hypoxia inducible factor 1, alpha subunit [Source:MGI Symbol;Acc:MGI:106918]	-
ENSMUSG00000041729	12.659	25.1492	7.74163	20.8409	11.1892	17.0783	385.61	345.029	339.264	384.832	271.719	359.466	15.7764	347.653	-4.44856	1.36718e-80	4.82488e-78	Coro2b	9	62419492	62537044	-	5919	protein_coding	coronin, actin binding protein, 2B [Source:MGI Symbol;Acc:MGI:2444283]	-
ENSMUSG00000028859	818.942	1080.41	709.65	534.049	665.138	989.405	35.831	55.7882	53.5247	48.9786	32.3904	44.592	799.598	45.1842	4.1444	2.24387e-80	7.79879e-78	Csf3r	4	126024550	126044440	+	3609	protein_coding	colony stimulating factor 3 receptor (granulocyte) [Source:MGI Symbol;Acc:MGI:1339755]	-
ENSMUSG00000017652	1170.47	1760.44	1425.75	801.073	1056.76	1449.38	73.3683	53.2134	100.462	78.5212	69.2794	63.7028	1277.31	73.0912	4.12632	4.79301e-80	1.641e-77	Cd40	2	165055627	165072948	+	3406	protein_coding	CD40 antigen [Source:MGI Symbol;Acc:MGI:88336]	-
ENSMUSG00000020400	7048.16	7257.04	5763.65	4306.26	4880.99	7505.36	689.321	715.806	798.753	791.432	611.819	684.35	6126.91	715.247	3.0986	5.34973e-80	1.80467e-77	Tnip1	11	54910785	54962917	-	3539	protein_coding	TNFAIP3 interacting protein 1 [Source:MGI Symbol;Acc:MGI:1926194]	-
ENSMUSG00000050370	538.496	656.896	781.905	412.911	538.327	927.923	17.0624	13.7325	7.41111	6.2195	3.59893	12.7406	642.743	10.1275	5.9912	6.75513e-80	2.24574e-77	Ch25h	19	34473786	34475135	-	1350	protein_coding	cholesterol 25-hydroxylase [Source:MGI Symbol;Acc:MGI:1333869]	-
ENSMUSG00000027398	488.833	423.512	429.661	328.245	354.326	297.163	4.2656	3.43312	5.7642	0	1.79947	2.73012	386.957	2.99875	7.01996	1.07866e-79	3.53476e-77	Il1b	2	129364570	129371139	-	1907	protein_coding	interleukin 1 beta [Source:MGI Symbol;Acc:MGI:96543]	-
ENSMUSG00000053475	1512.27	1996.84	2069.6	1440.63	1557.79	2717.73	159.533	184.53	177.867	126.722	179.047	171.998	1882.48	166.616	3.49869	2.21656e-79	7.16138e-77	Tnfaip6	2	52038009	52056686	+	1710	protein_coding	tumor necrosis factor alpha induced protein 6 [Source:MGI Symbol;Acc:MGI:1195266]	-
ENSMUSG00000006356	297	235.396	210.314	294.378	266.055	224.295	1740.37	1417.88	2111.34	2141.84	2053.19	2321.51	254.573	1964.36	-2.94754	5.08972e-79	1.62157e-76	Crip2	12	113140236	113145506	+	2099	protein_coding	cysteine rich protein 2 [Source:MGI Symbol;Acc:MGI:1915587]	-
ENSMUSG00000048572	3381.91	3298.56	3106.98	3468.71	2537.47	1836.49	126.262	84.9697	37.879	62.9725	63.8811	119.215	2938.35	82.5299	5.15522	6.94792e-79	2.18326e-76	Tmem252	19	24674008	24679661	+	2462	protein_coding	transmembrane protein 252 [Source:MGI Symbol;Acc:MGI:3583948]	-
ENSMUSG00000028381	2118.93	2096.43	1877.35	1728.49	1534.17	2006.13	413.763	478.062	415.846	471.127	410.278	434.089	1893.58	437.194	2.11506	2.82739e-78	8.76454e-76	Ugcg	4	59189257	59222833	+	5212	protein_coding	UDP-glucose ceramide glucosyltransferase [Source:MGI Symbol;Acc:MGI:1332243]	-
ENSMUSG00000054072	30544.3	23066.8	21378.5	10288.9	12831.6	36275.5	551.969	688.341	503.956	562.865	364.392	637.938	22397.6	551.577	5.34364	2.99286e-76	9.15377e-74	Iigp1	18	60376029	60392627	+	3121	protein_coding	interferon inducible GTPase 1 [Source:MGI Symbol;Acc:MGI:1926259]	-
ENSMUSG00000030107	3116.07	4023.87	3090.2	1406.76	2265.2	3570.51	108.346	127.025	149.869	143.826	145.757	175.638	2912.1	141.744	4.36111	2.1366e-75	6.44888e-73	Usp18	6	121245906	121270917	+	2790	protein_coding	ubiquitin specific peptidase 18 [Source:MGI Symbol;Acc:MGI:1344364]	-
ENSMUSG00000050578	1982.6	3697.93	1192.21	712.499	943.626	2471.8	2.55936	4.2914	1.64691	2.33231	7.19786	1.82008	1833.45	3.30799	9.12496	3.66741e-75	1.09255e-72	Mmp13	9	7272514	7283331	+	2673	protein_coding	matrix metallopeptidase 13 [Source:MGI Symbol;Acc:MGI:1340026]	-
ENSMUSG00000046879	9952.92	8485.33	8866.75	4892.41	6279.65	13067.2	518.697	552.732	509.72	654.603	520.945	595.166	8590.71	558.644	3.94276	3.86438e-75	1.13648e-72	Irgm1	11	48861968	48871683	-	5810	protein_coding	immunity-related GTPase family M member 1 [Source:MGI Symbol;Acc:MGI:107567]	-
ENSMUSG00000059866	1293.17	1260.48	1785.74	1751.94	1719.41	1327.56	235.461	247.185	247.037	286.875	268.12	292.123	1523.05	262.8	2.53431	1.48716e-74	4.31822e-72	Tnip2	5	34496087	34513991	-	2685	protein_coding	TNFAIP3 interacting protein 2 [Source:MGI Symbol;Acc:MGI:2386643]	-
ENSMUSG00000045349	842.312	574.407	434.822	601.782	461.245	363.199	2.55936	0.85828	3.29383	1.55488	2.6992	2.73012	546.295	2.28261	7.91	1.60405e-74	4.59941e-72	Sh2d5	4	138250403	138261332	+	3740	protein_coding	SH2 domain containing 5 [Source:MGI Symbol;Acc:MGI:2446215]	-
ENSMUSG00000024778	1908.59	2126.61	2784.41	2213.05	2275.14	3026.28	372.814	299.54	362.321	376.28	394.983	429.539	2389.01	372.579	2.68082	2.40895e-74	6.82209e-72	Fas	19	34290659	34327770	+	1801	protein_coding	Fas (TNF receptor superfamily member 6) [Source:MGI Symbol;Acc:MGI:95484]	-
ENSMUSG00000046718	8404.62	7949.15	7155.85	5561.92	6123	10281.2	803.639	914.927	1007.09	869.953	1009.5	1109.34	7579.28	952.408	2.9926	1.238e-73	3.46324e-71	Bst2	8	71534255	71537456	-	903	protein_coding	bone marrow stromal cell antigen 2 [Source:MGI Symbol;Acc:MGI:1916800]	-
ENSMUSG00000038067	7091.98	6113.26	6359.75	5578.86	5546.13	7824.15	0	0	0	0	0	0	6419.02	0	15.3211	3.97448e-73	1.09844e-70	Csf3	11	98701263	98703629	+	1413	protein_coding	colony stimulating factor 3 (granulocyte) [Source:MGI Symbol;Acc:MGI:1339751]	-
ENSMUSG00000028965	237.6	286.7	205.153	184.963	207.623	301.717	5.97184	6.00796	9.88148	3.10975	6.29813	8.19036	237.293	6.57659	5.18265	2.0111e-72	5.49197e-70	Tnfrsf9	4	150914562	150946102	+	2722	protein_coding	tumor necrosis factor receptor superfamily, member 9 [Source:MGI Symbol;Acc:MGI:1101059]	-
ENSMUSG00000105504	13261.8	13151	8171.29	3826.91	6136.67	14417.5	170.624	166.506	255.272	242.561	115.166	230.24	9827.53	196.728	5.64229	4.71143e-71	1.27148e-68	Gbp5	3	142493978	142522344	+	6637	protein_coding	guanylate binding protein 5 [Source:MGI Symbol;Acc:MGI:2429943]	-
ENSMUSG00000040483	2965.13	3452.48	2767.63	2090.61	2459.15	4409.63	260.202	223.153	293.974	321.082	250.126	334.895	3024.1	280.572	3.4301	2.81478e-70	7.50794e-68	Xaf1	11	72301629	72313733	+	4689	protein_coding	XIAP associated factor 1 [Source:MGI Symbol;Acc:MGI:3772572]	-
ENSMUSG00000025498	17991.4	19462.4	13631.7	7595.21	11538.6	24785.2	469.216	553.591	723.819	636.722	325.703	527.823	15834.1	539.479	4.87517	3.4037e-70	8.97442e-68	Irf7	7	141262706	141266481	-	3776	protein_coding	interferon regulatory factor 7 [Source:MGI Symbol;Acc:MGI:1859212]	IRF
ENSMUSG00000018930	1074.07	2072.29	1171.57	514.51	883.95	1785.25	2.55936	1.71656	4.11728	0	0	5.46024	1250.27	2.30891	9.09672	1.49411e-69	3.8947e-67	Ccl4	11	83662584	83664683	+	660	protein_coding	chemokine (C-C motif) ligand 4 [Source:MGI Symbol;Acc:MGI:98261]	-
ENSMUSG00000020901	1408.07	1534.1	1047.7	974.313	881.463	1247.86	87.8714	105.568	121.872	148.491	86.3744	90.094	1182.25	106.712	3.46834	3.2017e-69	8.2521e-67	Pik3r5	11	68432121	68497849	+	5550	protein_coding	phosphoinositide-3-kinase regulatory subunit 5 [Source:MGI Symbol;Acc:MGI:2443588]	-
ENSMUSG00000037849	1984.55	2152.77	1131.57	571.823	867.787	2408.04	12.7968	27.465	23.0568	20.2134	13.496	20.9309	1519.42	19.6598	6.27145	4.73957e-69	1.20801e-66	Ifi206	1	173468485	173491041	-	3054	protein_coding	interferon activated gene 206 [Source:MGI Symbol;Acc:MGI:3646410]	-
ENSMUSG00000043421	1322.38	922.471	1085.12	1418.49	788.22	1212.56	133.94	151.057	151.516	150.045	171.849	152.887	1124.87	151.882	2.88901	7.02934e-69	1.77193e-66	Hilpda	6	29272488	29275446	+	1103	protein_coding	hypoxia inducible lipid droplet associated [Source:MGI Symbol;Acc:MGI:1916823]	-
ENSMUSG00000000982	719.617	1009.99	699.327	286.563	538.327	915.399	0.85312	7.72452	3.29383	9.32925	5.3984	3.64016	694.87	5.03988	7.09786	2.07093e-68	5.1636e-66	Ccl3	11	83647844	83649355	-	766	protein_coding	chemokine (C-C motif) ligand 3 [Source:MGI Symbol;Acc:MGI:98260]	-
ENSMUSG00000028645	2186.12	1483.8	1339.3	1566.98	1166.17	1683.92	234.608	205.129	152.34	200.579	191.643	184.738	1571.05	194.839	3.01179	3.21986e-68	7.94198e-66	Slc2a1	4	119108711	119137983	+	3506	protein_coding	solute carrier family 2 (facilitated glucose transporter), member 1 [Source:MGI Symbol;Acc:MGI:95755]	-
ENSMUSG00000037411	14816.9	11189.4	8804.82	5413.43	7750.41	17725	462.391	460.038	402.67	492.896	589.325	382.217	10950	464.923	4.55785	5.91083e-68	1.44243e-65	Serpine1	5	137061504	137072268	-	3876	protein_coding	serine (or cysteine) peptidase inhibitor, clade E, member 1 [Source:MGI Symbol;Acc:MGI:97608]	-
ENSMUSG00000032000	4427.74	4527.86	3273.42	2421.45	2733.9	4934.5	316.508	316.705	372.203	405.823	296.012	287.573	3719.81	332.47	3.48371	1.07602e-67	2.5982e-65	Birc3	9	7848699	7873186	-	5009	protein_coding	baculoviral IAP repeat-containing 3 [Source:MGI Symbol;Acc:MGI:1197007]	-
ENSMUSG00000018899	8459.15	5360.8	7368.74	5731.25	5502.62	9850.78	497.369	533.85	839.103	728.459	549.737	590.616	7045.56	623.189	3.49879	1.88525e-67	4.50477e-65	Irf1	11	53770014	53778374	+	3976	protein_coding	interferon regulatory factor 1 [Source:MGI Symbol;Acc:MGI:96590]	IRF
ENSMUSG00000030748	6582.7	6888.86	4444.99	4045.74	3550.72	7114.83	466.657	428.282	581.361	531.767	409.379	463.21	5437.97	480.109	3.50157	1.66233e-66	3.93116e-64	Il4ra	7	125552120	125579474	+	6002	protein_coding	interleukin 4 receptor, alpha [Source:MGI Symbol;Acc:MGI:105367]	-
novel.271	510.256	472.804	361.276	253.999	243.677	548.784	7.67808	1.71656	9.05803	5.44206	4.49867	8.19036	398.466	6.09729	6.03071	2.11288e-66	4.94565e-64	-	2	81988858	81993792	+	4935	-	- && P21414.1 RecName: Full=Pol polyprotein; Contains: RecName: Full=Protease; Contains: RecName: Full=Reverse transcriptase/ribonuclease H; Short=RT; Contains: RecName: Full=Integrase; Short=IN && PF01140:Matrix protein (MA), p15	-
ENSMUSG00000002504	111.01	92.5489	79.9969	69.0356	63.4057	45.5422	958.054	801.634	816.869	927.483	985.208	1294.08	76.9232	963.888	-3.64152	2.37907e-66	5.51248e-64	Slc9a3r2	17	24639282	24650305	-	2257	protein_coding	solute carrier family 9 (sodium/hydrogen exchanger), member 3 regulator 2 [Source:MGI Symbol;Acc:MGI:1890662]	-
ENSMUSG00000066677	1523.95	1904.29	1218.02	543.167	969.734	1834.21	49.481	45.4889	46.937	36.5396	26.0923	39.1317	1332.23	40.6117	5.03549	3.4427e-66	7.89722e-64	Ifi208	1	173673675	173698395	+	5258	protein_coding	interferon activated gene 208 [Source:MGI Symbol;Acc:MGI:2442822]	-
ENSMUSG00000021281	8652.93	7603.09	8789.33	5689.57	6354.24	11740.8	1081.76	882.312	890.157	759.557	904.232	1032.9	8138.33	925.152	3.13712	4.66043e-66	1.05847e-63	Tnfaip2	12	111442469	111455018	+	4984	protein_coding	tumor necrosis factor, alpha-induced protein 2 [Source:MGI Symbol;Acc:MGI:104960]	-
ENSMUSG00000043613	6827.11	5575.07	3377.93	5427.76	3433.85	9082.26	185.98	210.279	293.151	344.405	236.63	185.648	5620.66	242.682	4.53315	7.2956e-66	1.64072e-63	Mmp3	9	7445822	7455975	+	1801	protein_coding	matrix metallopeptidase 3 [Source:MGI Symbol;Acc:MGI:97010]	-
ENSMUSG00000039232	980.588	1414.39	672.232	676.028	635.3	1145.39	30.7123	34.3312	65.0531	43.5365	35.9893	40.9518	920.654	41.7624	4.46146	2.78147e-65	6.19457e-63	Stx11	10	12938209	12964298	-	4209	protein_coding	syntaxin 11 [Source:MGI Symbol;Acc:MGI:1921982]	-
ENSMUSG00000078853	8090.09	5657.56	6949.41	3507.79	4198.45	9091.37	287.501	296.107	457.019	412.819	306.809	371.296	6249.11	355.259	4.13657	3.4666e-65	7.6462e-63	Igtp	11	58199556	58207591	+	2022	protein_coding	interferon gamma induced GTPase [Source:MGI Symbol;Acc:MGI:107729]	-
ENSMUSG00000036478	3605.88	3674.8	3816.62	3658.88	3344.34	3851.73	955.495	908.061	1035.09	949.252	1034.69	1297.72	3658.71	1030.05	1.8289	9.03716e-65	1.97432e-62	Btg1	10	96617006	96622809	+	5276	protein_coding	B cell translocation gene 1, anti-proliferative [Source:MGI Symbol;Acc:MGI:88215]	-
ENSMUSG00000024014	2138.4	2067.26	2099.27	1534.41	1678.39	2708.62	144.177	218.003	249.507	278.323	179.947	212.949	2037.73	213.818	3.25192	9.32471e-65	2.01792e-62	Pim1	17	29490812	29496111	+	2638	protein_coding	proviral integration site 1 [Source:MGI Symbol;Acc:MGI:97584]	-
ENSMUSG00000027955	83.7444	148.883	81.2871	85.9688	65.8922	93.3615	842.883	980.156	721.348	797.651	829.554	901.85	93.1895	845.574	-3.17584	1.03159e-64	2.21155e-62	Fam198b	3	79884533	79946280	+	9598	protein_coding	family with sequence similarity 198, member B [Source:MGI Symbol;Acc:MGI:1915909]	-
ENSMUSG00000074151	2552.26	2463.61	1860.57	952.17	1288.01	2395.52	99.8151	119.301	97.1679	75.4115	75.5776	108.295	1918.69	95.928	4.3227	1.47655e-64	3.13617e-62	Nlrc5	8	94434356	94527272	+	8493	protein_coding	NLR family, CARD domain containing 5 [Source:MGI Symbol;Acc:MGI:3612191]	-
ENSMUSG00000006403	2119.9	1756.42	870.934	547.074	632.813	675.163	10.2374	6.00796	2.47037	3.10975	1.79947	4.5502	1100.38	4.69587	7.87439	2.79123e-64	5.87414e-62	Adamts4	1	171250421	171260637	+	4810	protein_coding	a disintegrin-like and metallopeptidase (reprolysin type) with thrombospondin type 1 motif, 4 [Source:MGI Symbol;Acc:MGI:1339949]	-
ENSMUSG00000078794	19.4754	22.1313	16.7735	15.6307	16.1622	23.9097	209.014	258.342	361.498	387.941	294.213	303.043	19.0138	302.342	-3.98148	5.4143e-64	1.12908e-61	Dact3	7	16875317	16887462	+	2989	protein_coding	dishevelled-binding antagonist of beta-catenin 3 [Source:MGI Symbol;Acc:MGI:3654828]	-
ENSMUSG00000040328	2867.76	2309.7	1420.59	548.377	927.463	3383.79	12.7968	10.2994	15.6457	13.9939	2.6992	11.8305	1909.61	11.2109	7.40814	1.92321e-63	3.97447e-61	Olfr56	11	48978889	49135387	+	4537	protein_coding	olfactory receptor 56 [Source:MGI Symbol;Acc:MGI:1333785]	-
ENSMUSG00000097415	1094.52	1402.32	1299.3	1331.21	1393.68	1859.26	140.765	153.632	193.512	173.369	179.047	252.081	1396.72	182.068	2.94005	4.62121e-63	9.46482e-61	AU020206	7	75769038	75782099	-	3189	lincRNA	expressed sequence AU020206 [Source:MGI Symbol;Acc:MGI:2142134]	-
ENSMUSG00000095585	2241.62	1918.38	971.575	1078.52	589.3	1689.62	18.7686	30.0398	25.5272	22.5457	10.7968	40.9518	1414.83	24.7717	5.837	3.56475e-62	7.23644e-60	CR974586.3	JH584293.1	41602	43114	-	312	protein_coding		-
ENSMUSG00000052270	623.214	819.863	660.619	307.404	460.002	929.061	7.67808	3.43312	12.3519	13.9939	1.79947	7.28032	633.36	7.75612	6.33771	5.82089e-62	1.17128e-59	Fpr2	17	17887824	17893952	+	1296	protein_coding	formyl peptide receptor 2 [Source:MGI Symbol;Acc:MGI:1278319]	-
novel.14	316.476	416.47	290.311	263.117	261.082	453.145	10.2374	7.72452	4.94074	2.33231	5.3984	16.3807	333.434	7.83569	5.42888	6.86006e-62	1.36837e-59	-	1	170941521	170950326	+	3507	-	- && Q2F7I8.1 RecName: Full=Envelope glycoprotein; AltName: Full=Env polyprotein; Contains: RecName: Full=Surface protein; Short=SU; Contains: RecName: Full=Transmembrane protein; Short=TM; Contains: RecName: Full=R-peptide; Flags: Precursor && -	-
ENSMUSG00000066861	1360.36	1808.73	1041.25	580.941	920.004	2112.02	31.5654	27.465	56.8185	40.4268	40.488	42.7719	1303.88	39.9226	5.02934	2.70926e-61	5.35756e-59	Oas1g	5	120876142	120887613	-	2340	protein_coding	2'-5' oligoadenylate synthetase 1G [Source:MGI Symbol;Acc:MGI:97429]	-
ENSMUSG00000079014	472.279	659.914	357.405	329.547	276.001	465.669	0.85312	2.57484	8.23457	3.10975	0	1.82008	426.803	2.76539	7.24434	4.38549e-61	8.59818e-59	Serpina3i	12	104263122	104269372	+	2224	protein_coding	serine (or cysteine) peptidase inhibitor, clade A, member 3I [Source:MGI Symbol;Acc:MGI:2182841]	-
ENSMUSG00000043953	1577.51	1736.3	1477.36	833.637	1152.49	1522.25	171.477	193.971	171.279	194.359	170.05	169.267	1383.26	178.401	2.9551	6.99009e-61	1.35886e-58	Ccrl2	9	111054486	111057519	-	2598	protein_coding	chemokine (C-C motif) receptor-like 2 [Source:MGI Symbol;Acc:MGI:1920904]	-
ENSMUSG00000030144	752.725	930.519	612.879	578.336	395.353	1054.3	15.3562	18.8822	37.0556	11.6616	13.496	25.4811	720.686	20.3221	5.14915	8.16507e-61	1.57394e-58	Clec4d	6	123262111	123275265	+	1599	protein_coding	C-type lectin domain family 4, member d [Source:MGI Symbol;Acc:MGI:1298389]	-
ENSMUSG00000000386	4540.7	9178.44	3361.16	943.052	2891.8	7450.71	28.153	41.1975	28.821	50.5335	52.1845	54.6024	4727.64	42.582	6.79527	6.10086e-60	1.16623e-57	Mx1	16	97447035	97462907	-	3785	protein_coding	MX dynamin-like GTPase 1 [Source:MGI Symbol;Acc:MGI:97243]	-
ENSMUSG00000034459	7523.36	11541.5	6971.34	3037.56	5236.56	10296	144.177	209.42	304.679	340.518	225.833	217.5	7434.37	240.355	4.95067	6.75613e-60	1.28082e-57	Ifit1	19	34640871	34650009	+	2656	protein_coding	interferon-induced protein with tetratricopeptide repeats 1 [Source:MGI Symbol;Acc:MGI:99450]	-
ENSMUSG00000033355	3775.31	4175.77	2968.92	1990.31	2387.04	4327.65	281.53	279.799	317.854	363.841	276.218	361.286	3270.83	313.421	3.38356	9.45607e-60	1.77797e-57	Rtp4	16	23520291	23614222	+	2131	protein_coding	receptor transporter protein 4 [Source:MGI Symbol;Acc:MGI:1915025]	-
ENSMUSG00000060183	712.801	749.445	610.299	221.435	443.84	861.886	5.97184	2.57484	0.823457	0	3.59893	4.5502	599.951	2.91988	7.70861	3.89837e-59	7.27029e-57	Cxcl11	5	92359544	92365485	-	3794	polymorphic_pseudogene	chemokine (C-X-C motif) ligand 11 [Source:MGI Symbol;Acc:MGI:1860203]	-
ENSMUSG00000016496	4945.79	4076.18	3141.81	1811.86	2158.28	6052.56	156.121	129.6	160.574	185.03	100.77	161.077	3697.75	148.862	4.6343	8.3502e-59	1.54472e-56	Cd274	19	29367455	29388095	+	3622	protein_coding	CD274 antigen [Source:MGI Symbol;Acc:MGI:1926446]	-
ENSMUSG00000060477	1051.67	1041.18	939.318	668.212	800.652	955.248	159.533	204.271	150.693	177.256	152.955	146.516	909.38	165.204	2.46097	1.00889e-58	1.85144e-56	Irak2	6	113638467	113695026	+	4412	protein_coding	interleukin-1 receptor-associated kinase 2 [Source:MGI Symbol;Acc:MGI:2429603]	-
ENSMUSG00000022895	5500.84	5198.83	4945.61	5529.36	5670.46	4928.81	1579.98	1442.77	1188.25	1027.77	1466.56	1193.06	5295.65	1316.4	2.00837	1.97154e-58	3.58929e-56	Ets2	16	95702075	95721051	+	5780	protein_coding	E26 avian leukemia oncogene 2, 3' domain [Source:MGI Symbol;Acc:MGI:95456]	ETS
ENSMUSG00000042745	223.967	162.967	243.861	212.317	175.298	234.542	853.973	881.454	812.752	963.245	996.005	846.337	208.825	892.294	-2.09646	6.29312e-58	1.13668e-55	Id1	2	152736251	152737410	+	1160	protein_coding	inhibitor of DNA binding 1 [Source:MGI Symbol;Acc:MGI:96396]	bHLH
ENSMUSG00000047945	4709.16	6584.05	4437.25	2551.71	3676.29	6156.17	223.517	284.949	439.726	363.841	326.603	333.075	4685.77	328.619	3.83374	6.56445e-58	1.17642e-55	Marcksl1	4	129513581	129515985	+	1605	protein_coding	MARCKS-like 1 [Source:MGI Symbol;Acc:MGI:97143]	-
ENSMUSG00000032501	2264.02	1964.65	2045.08	1641.22	2086.17	2007.27	721.74	623.111	676.882	621.173	648.708	635.208	2001.4	654.47	1.61297	7.72947e-58	1.37447e-55	Trib1	15	59648350	59657099	+	6248	protein_coding	tribbles pseudokinase 1 [Source:MGI Symbol;Acc:MGI:2443397]	-
ENSMUSG00000035929	8317.96	9338.39	7321	4617.57	5935.27	10397.3	673.965	787.043	936.271	761.889	660.404	950.992	7654.58	795.094	3.2672	8.2903e-58	1.46226e-55	H2-Q4	17	35379617	35385290	+	2596	protein_coding	histocompatibility 2, Q region locus 4 [Source:MGI Symbol;Acc:MGI:95933]	-
ENSMUSG00000042354	2461.69	2450.53	2371.52	2442.3	2240.33	3076.38	815.583	769.019	764.992	639.831	754.876	764.434	2507.13	751.456	1.7386	8.35068e-58	1.46226e-55	Gnl3	14	31012433	31019152	-	6101	protein_coding	guanine nucleotide binding protein-like 3 (nucleolar) [Source:MGI Symbol;Acc:MGI:1353651]	-
ENSMUSG00000051359	23.3705	27.1611	32.2568	44.287	18.6487	23.9097	267.88	280.658	352.44	398.826	277.118	282.112	28.2723	309.839	-3.46557	1.51686e-57	2.63601e-55	Ncald	15	37366175	37792570	-	8581	protein_coding	neurocalcin delta [Source:MGI Symbol;Acc:MGI:1196326]	-
ENSMUSG00000001131	9490.38	8200.64	4008.88	5288.38	4227.04	14880.9	100.668	77.2452	224.804	221.57	136.759	116.485	7682.71	146.255	5.71446	1.67535e-57	2.88954e-55	Timp1	X	20870166	20874735	+	888	protein_coding	tissue inhibitor of metalloproteinase 1 [Source:MGI Symbol;Acc:MGI:98752]	-
ENSMUSG00000022346	1440.21	1665.88	1534.13	1241.34	1225.84	1879.76	267.88	187.963	246.214	213.795	199.741	308.504	1497.86	237.349	2.6584	3.82275e-57	6.54404e-55	Myc	15	61985391	61990374	+	2717	protein_coding	myelocytomatosis oncogene [Source:MGI Symbol;Acc:MGI:97250]	bHLH
ENSMUSG00000037876	3534.79	3412.24	2852.79	3071.43	3074.55	2509.38	821.555	738.979	763.345	931.37	657.705	726.212	3075.86	773.194	1.99192	5.6332e-57	9.57184e-55	Jmjd1c	10	67096125	67256326	+	17822	protein_coding	jumonji domain containing 1C [Source:MGI Symbol;Acc:MGI:1918614]	-
ENSMUSG00000032376	1236.69	1319.83	1138.02	1419.79	1357.63	1358.3	431.679	459.18	501.485	489.786	430.972	483.231	1305.04	466.056	1.48512	6.1128e-57	1.03104e-54	Usp3	9	66514637	66593142	-	6848	protein_coding	ubiquitin specific peptidase 3 [Source:MGI Symbol;Acc:MGI:2152450]	-
ENSMUSG00000041347	329.135	383.273	292.892	246.183	272.271	603.434	8.5312	11.1576	10.7049	17.1036	4.49867	14.5606	354.532	11.0928	4.99269	8.962e-57	1.50058e-54	Bdkrb1	12	105603085	105605428	+	1435	protein_coding	bradykinin receptor, beta 1 [Source:MGI Symbol;Acc:MGI:88144]	-
ENSMUSG00000033857	51.6099	49.2924	68.3844	89.8765	62.1624	56.9278	406.085	429.14	569.009	463.353	377.888	436.819	63.0422	447.049	-2.83622	2.0977e-56	3.4869e-54	Engase	11	118476829	118489209	+	5184	protein_coding	endo-beta-N-acetylglucosaminidase [Source:MGI Symbol;Acc:MGI:2443788]	-
ENSMUSG00000039699	635.873	502.983	598.686	272.235	329.461	708.181	17.0624	32.6146	27.9975	17.8811	22.4933	20.0209	507.903	23.0116	4.4651	2.21593e-56	3.65692e-54	Batf2	19	6140983	6172476	+	2522	protein_coding	basic leucine zipper transcription factor, ATF-like 2 [Source:MGI Symbol;Acc:MGI:1921731]	TF_bZIP
ENSMUSG00000031551	429.433	423.512	874.804	319.127	476.164	319.934	6.82496	0.85828	0.823457	1.55488	0.899733	6.37028	473.829	2.8886	7.37401	2.47082e-56	4.04845e-54	Ido1	8	24584136	24597009	-	1825	protein_coding	indoleamine 2,3-dioxygenase 1 [Source:MGI Symbol;Acc:MGI:96416]	-
ENSMUSG00000040033	3289.4	3430.35	2874.73	2254.73	2750.07	3848.32	365.135	423.132	510.543	541.097	369.79	568.775	3074.6	463.079	2.73109	6.62252e-56	1.0774e-53	Stat2	10	128270559	128292849	+	5926	protein_coding	signal transducer and activator of transcription 2 [Source:MGI Symbol;Acc:MGI:103039]	STAT
ENSMUSG00000027859	297	353.094	348.373	263.117	325.731	331.32	38.3904	57.5048	55.1716	49.756	51.2848	71.8932	319.773	54.0001	2.56857	1.02489e-55	1.65563e-53	Ngf	3	102469919	102521013	+	1469	protein_coding	nerve growth factor [Source:MGI Symbol;Acc:MGI:97321]	-
ENSMUSG00000056749	2810.3	2754.34	3201.17	4179.91	3014.88	2091.53	250.817	231.736	347.499	278.323	326.603	462.3	3008.69	316.213	3.25043	2.5353e-55	4.06694e-53	Nfil3	13	52967209	52981073	-	2026	protein_coding	nuclear factor, interleukin 3, regulated [Source:MGI Symbol;Acc:MGI:109495]	TF_bZIP
ENSMUSG00000085977	428.459	404.399	299.343	168.03	264.812	447.452	0	5.14968	4.11728	1.55488	1.79947	1.82008	335.416	2.4069	7.12131	2.69668e-55	4.29577e-53	Gm5970	18	60220843	60222058	+	1216	processed_pseudogene	predicted gene 5970 [Source:MGI Symbol;Acc:MGI:3646761]	-
ENSMUSG00000071637	18647.7	16981.7	18247	18827.2	17921.4	19434	2134.51	2266.72	1934.3	3262.91	1192.15	2232.33	18343.2	2170.48	3.07905	2.73371e-55	4.32473e-53	Cebpd	16	15887286	15891031	+	3746	protein_coding	CCAAT/enhancer binding protein (C/EBP), delta [Source:MGI Symbol;Acc:MGI:103573]	-
ENSMUSG00000004791	2882.36	1298.7	2078.63	2889.07	1626.17	1156.77	114.318	91.836	111.99	127.5	128.662	164.717	1988.62	123.171	4.01339	2.77507e-55	4.36009e-53	Pgf	12	85166635	85177790	-	2903	protein_coding	placental growth factor [Source:MGI Symbol;Acc:MGI:105095]	-
ENSMUSG00000003541	2818.09	2167.86	2959.88	2883.86	2740.12	3382.65	436.798	468.621	558.304	676.371	637.011	502.342	2825.41	546.574	2.36966	4.21555e-55	6.57827e-53	Ier3	17	35821684	35822923	+	1131	protein_coding	immediate early response 3 [Source:MGI Symbol;Acc:MGI:104814]	-
ENSMUSG00000032193	1808.29	1740.32	1802.51	1478.4	1999.14	1571.21	354.045	386.226	289.857	298.536	216.836	231.15	1733.31	296.108	2.54889	4.26447e-55	6.60964e-53	Ldlr	9	21723483	21749919	+	9622	protein_coding	low density lipoprotein receptor [Source:MGI Symbol;Acc:MGI:96765]	-
ENSMUSG00000021091	27280.2	26261.8	15239.4	13146.7	13515.4	17852.5	932.46	1222.19	942.858	1164.6	413.877	628.838	18882.7	884.138	4.41652	1.23058e-54	1.89451e-52	Serpina3n	12	104406729	104414329	+	2064	protein_coding	serine (or cysteine) peptidase inhibitor, clade A, member 3N [Source:MGI Symbol;Acc:MGI:105045]	-
ENSMUSG00000030595	1689.49	1640.73	1930.25	1410.67	1353.9	1849.01	476.894	491.795	470.194	497.56	474.159	458.66	1645.68	478.21	1.78299	1.36576e-54	2.08861e-52	Nfkbib	7	28758251	28767512	-	2169	protein_coding	nuclear factor of kappa light polypeptide gene enhancer in B cells inhibitor, beta [Source:MGI Symbol;Acc:MGI:104752]	-
ENSMUSG00000027514	6623.59	7062.89	4896.58	2853.9	3836.66	9867.86	166.358	193.113	319.501	241.006	106.169	180.188	5856.92	201.056	4.86402	1.55866e-54	2.36782e-52	Zbp1	2	173206612	173218923	-	3529	protein_coding	Z-DNA binding protein 1 [Source:MGI Symbol;Acc:MGI:1927449]	-
ENSMUSG00000074896	19076.2	24395.7	16934.8	6237.95	12612.8	28230.5	332.717	436.006	751.816	775.883	490.355	512.353	17914.6	549.855	5.02581	1.97136e-54	2.97507e-52	Ifit3	19	34583531	34588731	+	1745	protein_coding	interferon-induced protein with tetratricopeptide repeats 3 [Source:MGI Symbol;Acc:MGI:1101055]	-
ENSMUSG00000031780	245.39	292.736	344.503	240.973	192.704	373.446	0.85312	4.2914	9.05803	8.55182	3.59893	13.6506	281.625	6.66732	5.40082	8.58608e-54	1.2873e-51	Ccl17	8	94810453	94812036	+	514	protein_coding	chemokine (C-C motif) ligand 17 [Source:MGI Symbol;Acc:MGI:1329039]	-
ENSMUSG00000071036	219.099	217.289	206.444	144.584	217.568	210.633	0.85312	2.57484	0	3.88719	0.899733	2.73012	202.603	1.82417	6.78231	1.5313e-53	2.28094e-51	Gm10309	17	86497732	86505232	-	2005	protein_coding	predicted gene 10309 [Source:MGI Symbol;Acc:MGI:3641941]	-
ENSMUSG00000023030	2128.66	2134.66	1738	1771.48	1530.44	2245.23	531.494	461.755	512.19	442.362	494.853	404.058	1924.75	474.452	2.02068	2.23465e-53	3.30714e-51	Slc11a2	15	100387898	100425072	-	6354	protein_coding	solute carrier family 11 (proton-coupled divalent metal ion transporters), member 2 [Source:MGI Symbol;Acc:MGI:1345279]	-
ENSMUSG00000032508	4009.99	4052.03	3737.92	2523.05	3404.01	5759.95	342.954	361.336	546.775	499.115	309.508	389.497	3914.49	408.198	3.2612	2.6384e-53	3.87964e-51	Myd88	9	119335934	119341411	-	2576	protein_coding	myeloid differentiation primary response gene 88 [Source:MGI Symbol;Acc:MGI:108005]	-
ENSMUSG00000022126	2314.66	3223.12	2442.49	1421.09	1526.71	2944.3	0.85312	0	0	0	0	0	2312.06	0.142187	13.3672	6.52544e-53	9.53421e-51	Acod1	14	103046977	103056573	+	2623	protein_coding	aconitate decarboxylase 1 [Source:MGI Symbol;Acc:MGI:103206]	-
ENSMUSG00000029371	2913.52	2754.34	1832.19	2326.37	2390.77	3004.65	0	0	1.64691	0	0	0	2536.97	0.274486	13.0202	1.04967e-52	1.52395e-50	Cxcl5	5	90759360	90761624	+	1863	protein_coding	chemokine (C-X-C motif) ligand 5 [Source:MGI Symbol;Acc:MGI:1096868]	-
ENSMUSG00000020846	93.4821	104.621	72.2552	66.4304	58.4327	62.6206	716.621	550.158	602.77	551.981	953.717	799.015	76.3069	695.71	-3.18194	1.58927e-52	2.29284e-50	Rflnb	11	76019194	76027782	-	3512	protein_coding	refilin B [Source:MGI Symbol;Acc:MGI:1923816]	-
ENSMUSG00000015316	746.883	890.28	474.82	280.05	344.38	646.699	0	4.2914	1.64691	0.777438	1.79947	0	563.852	1.4192	8.63486	1.77729e-52	2.54808e-50	Slamf1	1	171767127	171801184	+	6156	protein_coding	signaling lymphocytic activation molecule family member 1 [Source:MGI Symbol;Acc:MGI:1351314]	-
ENSMUSG00000079363	9008.36	6394.93	7519.71	3725.32	4301.64	13105.9	290.061	183.672	155.633	117.393	205.139	360.376	7342.64	218.712	5.06974	2.35774e-52	3.35927e-50	Gbp4	5	105115767	105139586	-	7494	protein_coding	guanylate binding protein 4 [Source:MGI Symbol;Acc:MGI:97072]	-
ENSMUSG00000016087	90.5608	81.4833	87.7385	89.8765	63.4057	89.9459	423.148	396.525	317.031	348.292	389.584	351.276	83.8351	370.976	-2.14403	2.78107e-52	3.93796e-50	Fli1	9	32422204	32542861	-	3486	protein_coding	Friend leukemia integration 1 [Source:MGI Symbol;Acc:MGI:95554]	ETS
ENSMUSG00000021814	8218.63	8146.32	8634.5	8245.19	9914.91	9912.26	3548.98	3525.82	3508.75	3633.74	3239.94	3213.35	8845.3	3445.1	1.36025	1.81129e-51	2.54903e-49	Anxa7	14	20455260	20480133	-	5991	protein_coding	annexin A7 [Source:MGI Symbol;Acc:MGI:88031]	-
ENSMUSG00000024338	3560.11	3837.76	3790.82	2483.98	2609.58	4374.33	419.735	562.174	609.358	536.432	451.666	641.578	3442.76	536.824	2.68116	3.70353e-51	5.1802e-49	Psmb8	17	34197721	34201454	+	2736	protein_coding	proteasome (prosome, macropain) subunit, beta type 8 (large multifunctional peptidase 7) [Source:MGI Symbol;Acc:MGI:1346527]	-
ENSMUSG00000028996	10.7115	10.0597	15.4833	9.1179	23.6217	6.83133	259.349	205.129	177.043	197.469	295.112	282.112	12.6376	236.036	-4.23894	3.88826e-51	5.40562e-49	Rbp7	4	149449687	149454978	-	718	protein_coding	retinol binding protein 7, cellular [Source:MGI Symbol;Acc:MGI:1890409]	-
ENSMUSG00000059089	1176.32	1663.87	1405.11	557.495	636.543	1757.93	7.67808	29.1815	27.9975	41.9816	25.1925	32.7614	1199.54	27.4655	5.44746	4.20171e-51	5.8062e-49	Fcgr4	1	171018920	171029761	+	1256	protein_coding	Fc receptor, IgG, low affinity IV [Source:MGI Symbol;Acc:MGI:2179523]	-
ENSMUSG00000033849	24.3443	31.185	41.2887	28.6563	19.892	19.3554	977.676	956.124	532.777	581.523	361.693	439.549	27.4536	641.557	-4.54968	6.25502e-51	8.59185e-49	B3galt2	1	143640664	143654614	+	9288	protein_coding	UDP-Gal:betaGlcNAc beta 1,3-galactosyltransferase, polypeptide 2 [Source:MGI Symbol;Acc:MGI:1349461]	-
ENSMUSG00000016559	17362.3	19999.6	18501.2	15628.1	16294	25326	3723.87	3862.26	4943.21	4673.96	3942.63	4056.96	18851.9	4200.48	2.16606	8.79967e-51	1.20152e-48	H3f3b	11	116021912	116027962	-	2976	protein_coding	H3 histone, family 3B [Source:MGI Symbol;Acc:MGI:1101768]	-
ENSMUSG00000078920	6944.94	8261	6897.79	3275.93	4264.34	8993.45	151.855	194.83	375.496	399.603	153.854	211.129	6439.58	247.795	4.69919	9.43672e-51	1.28088e-48	Ifi47	11	49076587	49096974	+	2473	protein_coding	interferon gamma inducible protein 47 [Source:MGI Symbol;Acc:MGI:99448]	-
ENSMUSG00000001665	15.5803	24.1432	25.8054	26.0512	16.1622	28.4639	162.093	204.271	245.39	254.222	197.042	233.88	22.701	216.15	-3.25872	9.93669e-51	1.34081e-48	Gstt3	10	75774115	75781414	-	3842	protein_coding	glutathione S-transferase, theta 3 [Source:MGI Symbol;Acc:MGI:2143526]	-
ENSMUSG00000018500	801.414	1021.06	643.846	454.593	437.623	867.579	36.6842	52.3551	57.642	39.6493	37.7888	67.343	704.352	48.5771	3.85968	1.09727e-50	1.47194e-48	Adora2b	11	62248984	62266453	+	1845	protein_coding	adenosine A2b receptor [Source:MGI Symbol;Acc:MGI:99403]	-
ENSMUSG00000025283	5917.61	6870.75	7087.46	7181	5691.59	8181.66	1694.3	1739.73	1976.3	1948.26	2168.36	2115.84	6821.68	1940.46	1.81375	4.03483e-50	5.38111e-48	Sat1	X	155213132	155216449	-	2774	protein_coding	spermidine/spermine N1-acetyl transferase 1 [Source:MGI Symbol;Acc:MGI:98233]	-
ENSMUSG00000002983	1860.88	2083.36	1815.41	1465.38	1582.66	2254.34	291.767	271.217	354.086	341.295	179.047	246.621	1843.67	280.672	2.71498	8.09716e-50	1.07365e-47	Relb	7	19606217	19629438	-	3885	protein_coding	avian reticuloendotheliosis viral (v-rel) oncogene related B [Source:MGI Symbol;Acc:MGI:103289]	RHD
ENSMUSG00000002233	5739.41	6181.66	5999.77	6269.21	5387	6914.45	1568.89	1404.15	1910.42	1515.23	2018.1	1881.05	6081.92	1716.31	1.82534	8.98349e-50	1.18432e-47	Rhoc	3	104788375	104794459	+	1618	protein_coding	ras homolog family member C [Source:MGI Symbol;Acc:MGI:106028]	-
ENSMUSG00000047180	1813.16	1229.29	1521.23	1147.55	1173.63	1845.6	174.89	223.153	247.037	160.152	253.725	240.251	1455.08	216.535	2.74931	9.10423e-50	1.19338e-47	Neurl3	1	36264597	36274679	-	3217	protein_coding	neuralized E3 ubiquitin protein ligase 3 [Source:MGI Symbol;Acc:MGI:2429944]	-
ENSMUSG00000031834	204.492	127.758	141.93	213.619	169.082	128.657	1077.49	1034.23	1245.89	1418.05	841.25	1014.69	164.256	1105.27	-2.75112	1.37802e-49	1.79605e-47	Pik3r2	8	70768176	70776713	-	4176	protein_coding	phosphoinositide-3-kinase regulatory subunit 2 [Source:MGI Symbol;Acc:MGI:1098772]	-
ENSMUSG00000047182	9.73772	1.00597	2.58054	7.81535	4.97299	3.41567	148.443	156.207	160.574	154.71	131.361	131.046	4.92137	147.057	-4.89369	1.41932e-49	1.83943e-47	Irs3	5	137643031	137645714	-	2338	protein_coding	insulin receptor substrate 3 [Source:MGI Symbol;Acc:MGI:1194882]	-
ENSMUSG00000029084	2742.14	2682.91	2167.66	1901.73	1692.06	3126.47	359.164	447.164	337.617	269.771	285.215	373.116	2385.5	345.341	2.78863	3.1283e-49	4.03147e-47	Cd38	5	43868553	43912375	+	3890	protein_coding	CD38 antigen [Source:MGI Symbol;Acc:MGI:107474]	-
ENSMUSG00000089929	183.069	219.301	201.282	160.215	105.676	144.597	0.85312	6.00796	6.58766	7.77438	8.99733	6.37028	169.023	6.09845	4.79369	6.59256e-49	8.44843e-47	Bcl2a1b	9	89199209	89207827	+	817	protein_coding	B cell leukemia/lymphoma 2 related protein A1b [Source:MGI Symbol;Acc:MGI:1278326]	-
ENSMUSG00000017009	28701.9	33819.6	22850.7	24443.8	21488.3	51999	1056.16	1080.57	2328.74	2137.18	1152.56	818.126	30550.5	1428.89	4.41812	1.19046e-48	1.51711e-46	Sdc4	2	164424247	164443887	-	2547	protein_coding	syndecan 4 [Source:MGI Symbol;Acc:MGI:1349164]	-
ENSMUSG00000028268	17217.3	18927.3	10722.2	7001.25	8902.9	24749.9	505.9	545.866	876.158	773.551	356.294	539.654	14586.8	599.571	4.60445	1.31836e-48	1.67083e-46	Gbp3	3	142560026	142573209	+	3265	protein_coding	guanylate binding protein 3 [Source:MGI Symbol;Acc:MGI:1926263]	-
ENSMUSG00000075012	755.647	939.573	562.559	328.245	483.624	512.35	43.5091	42.0557	47.7605	59.8627	36.8891	46.412	596.999	46.0815	3.6948	1.47147e-48	1.85462e-46	Fjx1	2	102449366	102452499	-	3134	protein_coding	four jointed box 1 [Source:MGI Symbol;Acc:MGI:1341907]	-
ENSMUSG00000024013	22.3967	36.2148	21.9346	10.4205	11.1892	13.6627	237.167	289.24	373.026	324.969	283.416	387.677	19.3031	315.916	-4.01059	1.72366e-48	2.16061e-46	Fgd2	17	29360914	29379660	+	4134	protein_coding	FYVE, RhoGEF and PH domain containing 2 [Source:MGI Symbol;Acc:MGI:1347084]	-
ENSMUSG00000027361	779.991	852.054	767.712	767.207	729.787	843.67	262.761	239.46	274.211	188.14	233.031	265.732	790.07	243.889	1.69697	5.90081e-48	7.31176e-46	Gabpb1	2	126627442	126676337	-	7752	protein_coding	GA repeat binding protein, beta 1 [Source:MGI Symbol;Acc:MGI:95611]	-
ENSMUSG00000032661	1032.2	1495.87	685.134	303.496	515.948	1193.21	13.6499	27.465	30.4679	17.8811	11.6965	16.3807	870.976	19.5902	5.47296	5.92034e-48	7.31176e-46	Oas3	5	120753098	120777661	-	7069	protein_coding	2'-5' oligoadenylate synthetase 3 [Source:MGI Symbol;Acc:MGI:2180850]	-
ENSMUSG00000037822	568.683	695.123	717.391	769.812	661.408	588.633	1781.31	2152.57	2131.93	2310.55	1990.21	2224.14	666.842	2098.45	-1.65497	5.92871e-48	7.31176e-46	Smim14	5	65446844	65537184	-	15976	protein_coding	small integral membrane protein 14 [Source:MGI Symbol;Acc:MGI:1915802]	-
ENSMUSG00000072620	5515.44	7456.22	4928.84	3402.28	3835.42	7990.38	382.198	551.874	615.122	594.74	476.859	629.748	5521.43	541.757	3.34937	9.21476e-48	1.13036e-45	Slfn2	11	83065112	83070678	+	1664	protein_coding	schlafen 2 [Source:MGI Symbol;Acc:MGI:1313258]	-
ENSMUSG00000045954	271.682	346.052	225.798	127.651	116.865	340.428	4224.65	3857.11	4522.43	6644.76	3364.1	3423.57	238.079	4339.44	-4.18621	1.05263e-47	1.28438e-45	Cavin2	1	51289126	51302960	+	3055	protein_coding	caveolae associated 2 [Source:MGI Symbol;Acc:MGI:99513]	-
ENSMUSG00000048489	6722.92	4041.97	5546.88	18304.8	13555.1	5922.77	192.805	291.815	88.9334	161.707	146.656	282.112	9015.75	194.005	5.53851	1.19457e-47	1.44986e-45	Depp1	6	116650609	116652794	+	1358	protein_coding	DEPP1 autophagy regulator [Source:MGI Symbol;Acc:MGI:1918730]	-
ENSMUSG00000090272	7945.98	9582.84	6158.47	3658.88	5577.21	13406.5	363.429	377.643	492.427	544.984	527.244	588.796	7721.64	482.421	4.00062	1.29524e-47	1.56376e-45	Mndal	1	173849126	173942491	-	3628	protein_coding	myeloid nuclear differentiation antigen like [Source:MGI Symbol;Acc:MGI:3780953]	-
ENSMUSG00000026558	2260.12	2322.78	2010.24	1781.9	1767.9	1957.18	516.991	437.723	590.419	554.313	374.289	505.982	2016.69	496.619	2.02166	1.39934e-47	1.6806e-45	Uck2	1	167222883	167285320	-	5464	protein_coding	uridine-cytidine kinase 2 [Source:MGI Symbol;Acc:MGI:1931744]	-
ENSMUSG00000017830	1636.91	2750.31	1282.53	716.407	1000.82	2032.32	69.9559	80.6783	100.462	99.512	64.7808	67.343	1569.88	80.4553	4.28566	2.06333e-47	2.46515e-45	Dhx58	11	100694884	100704271	-	3272	protein_coding	DEXH (Asp-Glu-X-His) box polypeptide 58 [Source:MGI Symbol;Acc:MGI:1931560]	-
ENSMUSG00000003949	119.774	101.603	86.4482	65.1279	89.5139	91.0844	775.486	1296	1549.75	2418.61	960.915	1143.92	92.2585	1357.45	-3.87629	2.86797e-47	3.40873e-45	Hlf	11	90336536	90390895	-	6681	protein_coding	hepatic leukemia factor [Source:MGI Symbol;Acc:MGI:96108]	TF_bZIP
ENSMUSG00000024675	1225.98	1504.93	1078.67	201.896	653.949	1367.41	14.503	24.0318	26.3506	17.8811	15.2955	24.5711	1005.47	20.4389	5.6208	3.68374e-47	4.35573e-45	Ms4a4c	19	11404770	11427246	+	1751	protein_coding	membrane-spanning 4-domains, subfamily A, member 4C [Source:MGI Symbol;Acc:MGI:1927656]	-
ENSMUSG00000027613	3877.56	4008.78	3882.43	3955.87	3545.74	5233.94	929.901	971.573	1309.3	1113.29	1181.35	1129.36	4084.05	1105.8	1.88494	1.84657e-46	2.17223e-44	Eif6	2	155819832	155826925	-	2702	protein_coding	eukaryotic translation initiation factor 6 [Source:MGI Symbol;Acc:MGI:1196288]	-
ENSMUSG00000082292	3903.85	3118.5	2433.45	840.15	1104	4676.05	41.8029	42.0557	62.5827	72.3017	20.6939	59.1526	2679.33	49.7649	5.74953	2.92879e-46	3.42774e-44	Gm12250	11	58187739	58189012	+	1274	processed_pseudogene	predicted gene 12250 [Source:MGI Symbol;Acc:MGI:3649299]	-
ENSMUSG00000024235	1883.27	2225.2	1372.85	1030.32	1243.25	2469.53	155.268	175.947	170.456	213.018	125.063	129.226	1704.07	161.496	3.3989	3.07852e-46	3.58468e-44	Map3k8	18	4331327	4353015	-	4504	protein_coding	mitogen-activated protein kinase kinase kinase 8 [Source:MGI Symbol;Acc:MGI:1346878]	-
ENSMUSG00000004951	30246.3	29386.3	49946.4	42149.5	49789.6	28014.2	6623.62	3824.5	5182.01	4741.59	6026.41	5014.32	38255.4	5235.41	2.86928	6.98673e-46	8.09438e-44	Hspb1	5	135887919	135889563	+	1031	protein_coding	heat shock protein 1 [Source:MGI Symbol;Acc:MGI:96240]	-
ENSMUSG00000010307	76.928	89.531	83.8677	78.1535	103.19	59.2049	315.654	370.777	433.962	352.179	379.687	355.826	81.8124	368.014	-2.17096	1.07575e-45	1.24003e-43	Tmem86a	7	47050601	47054777	+	1887	protein_coding	transmembrane protein 86A [Source:MGI Symbol;Acc:MGI:1915143]	-
ENSMUSG00000024679	3605.88	4611.35	2642.48	1800.13	1980.49	4770.55	162.093	216.287	237.979	317.972	170.05	206.579	3235.15	218.493	3.88782	1.31044e-45	1.50301e-43	Ms4a6d	19	11586604	11604849	-	1735	protein_coding	membrane-spanning 4-domains, subfamily A, member 6D [Source:MGI Symbol;Acc:MGI:1916024]	-
ENSMUSG00000057596	2073.16	2324.79	1668.32	1031.63	1373.79	2429.68	187.686	229.161	231.391	268.993	210.538	223.87	1816.89	225.273	3.01178	2.01063e-45	2.29462e-43	Trim30d	7	104470014	104507849	-	3758	protein_coding	tripartite motif-containing 30D [Source:MGI Symbol;Acc:MGI:3035181]	-
ENSMUSG00000020115	1489.87	1736.3	1532.84	1483.61	1266.87	1512	576.709	509.818	527.836	583.856	480.457	566.955	1503.58	540.939	1.47501	2.33074e-45	2.64677e-43	Tbk1	10	121546455	121586787	-	3910	protein_coding	TANK-binding kinase 1 [Source:MGI Symbol;Acc:MGI:1929658]	-
ENSMUSG00000022048	112.958	120.716	113.544	121.138	90.7571	169.645	622.778	663.451	919.801	928.261	1099.47	1115.71	121.46	891.579	-2.87506	2.96893e-45	3.35489e-43	Dpysl2	14	66802864	66868688	-	4520	protein_coding	dihydropyrimidinase-like 2 [Source:MGI Symbol;Acc:MGI:1349763]	-
ENSMUSG00000035863	220.072	251.492	132.898	143.281	130.541	248.205	1508.32	1612.71	2526.37	2873.41	1683.4	1789.14	187.748	1998.89	-3.40965	3.69565e-45	4.15562e-43	Palm	10	79793572	79820896	+	5655	protein_coding	paralemmin [Source:MGI Symbol;Acc:MGI:1261814]	-
ENSMUSG00000041773	4602.04	5270.26	3141.81	2342	2467.85	3602.39	196.218	189.68	243.743	432.255	214.136	323.064	3571.06	266.516	3.74382	4.43224e-45	4.95957e-43	Enc1	13	97241105	97253034	+	4737	protein_coding	ectodermal-neural cortex 1 [Source:MGI Symbol;Acc:MGI:109610]	-
ENSMUSG00000003762	737.145	684.057	687.715	690.356	609.192	676.302	167.212	150.199	210.805	239.451	192.543	189.288	680.794	191.583	1.82842	6.32252e-45	7.0404e-43	Coq8b	7	27233023	27257950	+	5586	protein_coding	coenzyme Q8B [Source:MGI Symbol;Acc:MGI:1924139]	-
ENSMUSG00000040841	48.6886	45.2685	41.2887	36.4716	36.0542	54.6507	192.805	191.396	226.451	227.012	219.535	250.261	43.737	217.91	-2.30831	1.05535e-44	1.1695e-42	Six5	7	19094594	19098549	+	3007	protein_coding	sine oculis-related homeobox 5 [Source:MGI Symbol;Acc:MGI:106220]	Homeobox
ENSMUSG00000028811	2177.35	2256.38	2296.68	2454.02	2394.5	2208.8	1109.91	963.849	1055.67	875.395	995.105	936.431	2297.96	989.394	1.21556	1.2328e-44	1.35958e-42	Yars	4	129189760	129219607	+	5943	protein_coding	tyrosyl-tRNA synthetase [Source:MGI Symbol;Acc:MGI:2147627]	-
ENSMUSG00000022241	2004.02	1803.7	1781.87	1887.41	1846.22	2008.41	958.907	969.857	961.798	891.721	956.416	896.39	1888.6	939.181	1.00816	1.24955e-44	1.37145e-42	Tars	15	11382301	11399665	-	5901	protein_coding	threonyl-tRNA synthetase [Source:MGI Symbol;Acc:MGI:106314]	-
ENSMUSG00000041828	317.45	539.198	205.153	177.148	222.541	367.753	3144.6	4102.58	3071.49	4623.42	3477.47	3938.65	304.874	3726.37	-3.60943	1.50742e-44	1.6466e-42	Abca8a	11	110025634	110095978	-	6272	protein_coding	ATP-binding cassette, sub-family A (ABC1), member 8a [Source:MGI Symbol;Acc:MGI:2386846]	-
ENSMUSG00000037348	101.272	92.5489	83.8677	93.7842	106.919	95.6387	296.033	328.721	387.848	415.152	394.083	372.206	95.6718	365.674	-1.93348	2.7412e-44	2.98011e-42	Paqr7	4	134496697	134510235	+	4259	protein_coding	progestin and adipoQ receptor family member VII [Source:MGI Symbol;Acc:MGI:1919154]	-
ENSMUSG00000004562	137.302	170.008	96.7704	102.902	120.595	100.193	569.884	497.803	562.421	598.627	521.845	602.447	121.295	558.838	-2.19743	4.66911e-44	5.0521e-42	Arhgef40	14	51984719	52006251	+	10366	protein_coding	Rho guanine nucleotide exchange factor (GEF) 40 [Source:MGI Symbol;Acc:MGI:2685515]	-
ENSMUSG00000039765	89.587	98.5847	81.2871	100.297	83.2977	91.0844	418.882	434.29	454.548	567.53	344.598	359.466	90.6896	429.886	-2.24468	6.50841e-44	7.00922e-42	Cc2d2a	5	43662346	43740972	+	6809	protein_coding	coiled-coil and C2 domain containing 2A [Source:MGI Symbol;Acc:MGI:1924487]	-
ENSMUSG00000014353	2335.1	2063.24	2069.6	2386.29	1976.77	2310.13	707.237	642.852	659.589	881.614	589.325	653.409	2190.19	689.004	1.66801	7.34837e-44	7.87684e-42	Tmem87b	2	128818118	128854261	+	8395	protein_coding	transmembrane protein 87B [Source:MGI Symbol;Acc:MGI:1919727]	-
ENSMUSG00000020077	2972.92	3587.28	2763.76	2263.85	2297.52	3431.61	602.303	584.489	593.712	464.908	638.811	744.413	2886.16	604.773	2.25525	8.21928e-44	8.7694e-42	Srgn	10	62493833	62527451	-	2196	protein_coding	serglycin [Source:MGI Symbol;Acc:MGI:97756]	-
ENSMUSG00000012519	2603.87	2784.52	1589.62	966.498	1291.74	3006.92	111.759	145.049	155.633	157.042	108.868	87.3639	2040.53	127.619	3.99854	8.61283e-44	9.14674e-42	Mlkl	8	111311797	111338177	-	2303	protein_coding	mixed lineage kinase domain-like [Source:MGI Symbol;Acc:MGI:1921818]	-
ENSMUSG00000110588	347.636	250.486	559.978	455.895	409.029	350.675	0	3.43312	0	1.55488	0	0	395.617	0.831333	8.8618	8.72894e-44	9.22734e-42	Gm45774	8	94170748	94173412	-	2665	antisense	predicted gene 45774 [Source:MGI Symbol;Acc:MGI:5804889]	-
ENSMUSG00000039997	9362.81	11088.8	6056.54	3622.41	4847.43	12182.5	401.82	421.416	627.474	596.295	358.094	445.92	7860.08	475.17	4.04791	9.3082e-44	9.79453e-42	Ifi203	1	173920407	173942672	-	6706	protein_coding	interferon activated gene 203 [Source:MGI Symbol;Acc:MGI:96428]	-
ENSMUSG00000027221	72.0591	64.3819	73.5455	56.01	33.5677	29.6024	647.518	853.989	461.136	773.551	490.355	578.786	54.8611	634.222	-3.52856	1.77697e-43	1.86128e-41	Chst1	2	92599707	92615250	+	2680	protein_coding	carbohydrate (keratan sulfate Gal-6) sulfotransferase 1 [Source:MGI Symbol;Acc:MGI:1924219]	-
ENSMUSG00000032691	458.646	419.488	258.054	141.979	208.866	423.543	2.55936	10.2994	9.88148	12.439	10.7968	11.8305	318.429	9.63442	5.04745	2.36768e-43	2.46873e-41	Nlrp3	11	59541568	59566956	+	4057	protein_coding	NLR family, pyrin domain containing 3 [Source:MGI Symbol;Acc:MGI:2653833]	-
ENSMUSG00000054203	20031.5	23289.1	14013.6	9818.68	11103.5	27369.7	1066.4	1595.54	1152.02	1823.09	1046.39	1489.74	17604.3	1362.2	3.69191	2.59427e-43	2.69276e-41	Ifi205	1	174011998	174031810	-	4177	protein_coding	interferon activated gene 205 [Source:MGI Symbol;Acc:MGI:101847]	-
ENSMUSG00000036390	3662.35	3498.75	8234.52	6847.55	6855.27	3291.56	350.632	315.847	256.919	208.353	521.845	392.227	5398.33	340.971	3.9851	3.20166e-43	3.30824e-41	Gadd45a	6	67035096	67037457	-	1764	protein_coding	growth arrest and DNA-damage-inducible 45 alpha [Source:MGI Symbol;Acc:MGI:107799]	-
ENSMUSG00000031489	34.082	34.2029	63.2233	15.6307	46.0002	12.5241	678.231	844.548	629.945	458.688	629.813	723.482	34.2772	660.784	-4.27218	3.49714e-43	3.59735e-41	Adrb3	8	27225776	27250616	-	3376	protein_coding	adrenergic receptor, beta 3 [Source:MGI Symbol;Acc:MGI:87939]	-
ENSMUSG00000007476	857.893	885.251	1020.61	1043.35	1067.95	966.634	191.952	191.396	219.863	217.683	289.714	300.313	973.614	235.154	2.05027	5.27178e-43	5.39863e-41	Lrrc8a	2	30237715	30263790	+	4308	protein_coding	leucine rich repeat containing 8A [Source:MGI Symbol;Acc:MGI:2652847]	-
ENSMUSG00000029321	3836.66	3892.08	3646.31	3627.62	3702.39	4924.25	98.9619	131.317	216.569	391.051	78.2768	188.378	3938.22	184.092	4.41804	6.70991e-43	6.84083e-41	Slc10a6	5	103605711	103629403	-	2124	protein_coding	solute carrier family 10 (sodium/bile acid cotransporter family), member 6 [Source:MGI Symbol;Acc:MGI:1923000]	-
ENSMUSG00000049241	5.84263	5.02983	12.9027	2.60512	0	3.41567	175.743	308.981	261.859	171.814	159.253	300.313	4.96599	229.66	-5.53377	9.82008e-43	9.96738e-41	Hcar1	5	123876736	123880020	-	3285	protein_coding	hydrocarboxylic acid receptor 1 [Source:MGI Symbol;Acc:MGI:2441671]	-
ENSMUSG00000038301	4446.24	5371.86	4456.6	2577.76	2921.63	5346.66	508.46	590.497	703.232	649.938	473.26	635.208	4186.79	593.432	2.8187	2.18e-42	2.20295e-40	Snx10	6	51523901	51590679	+	9300	protein_coding	sorting nexin 10 [Source:MGI Symbol;Acc:MGI:1919232]	-
ENSMUSG00000021266	3287.45	2800.61	2532.8	2237.79	2079.95	2942.03	786.577	790.476	825.927	790.654	811.559	786.275	2646.77	798.578	1.72913	3.24262e-42	3.26239e-40	Wars	12	108860030	108894174	-	3447	protein_coding	tryptophanyl-tRNA synthetase [Source:MGI Symbol;Acc:MGI:104630]	-
ENSMUSG00000089715	264.866	187.11	118.705	203.199	152.92	225.434	1521.97	1386.98	2521.43	2829.87	1606.02	1558.9	192.039	1904.19	-3.30798	3.95625e-42	3.96299e-40	Cbx6	15	79823896	79834688	-	10609	protein_coding	chromobox 6 [Source:MGI Symbol;Acc:MGI:3512628]	-
ENSMUSG00000010358	2674.95	3318.68	2750.86	2194.81	2058.82	3688.92	508.46	490.078	667.824	512.332	533.542	635.208	2781.17	557.907	2.31783	4.45404e-42	4.44222e-40	Ifi35	11	101448407	101458698	+	1727	protein_coding	interferon-induced protein 35 [Source:MGI Symbol;Acc:MGI:1917360]	-
ENSMUSG00000039236	4828.93	5634.42	3011.5	1557.86	2208.01	6743.66	174.89	166.506	220.686	240.228	117.865	165.627	3997.4	180.967	4.46492	4.9341e-42	4.89971e-40	Isg20	7	78913424	78920396	+	1860	protein_coding	interferon-stimulated protein [Source:MGI Symbol;Acc:MGI:1928895]	-
ENSMUSG00000024168	95.4296	57.3401	21.9346	59.9177	44.7569	85.3917	656.903	703.79	740.288	761.112	603.721	674.34	60.7951	690.025	-3.49667	7.19633e-42	7.11538e-40	Tmem204	17	25057702	25083591	-	2378	protein_coding	transmembrane protein 204 [Source:MGI Symbol;Acc:MGI:3039635]	-
ENSMUSG00000043263	3451.05	4413.18	2070.89	999.062	1606.28	4260.47	90.4307	148.482	145.752	132.164	79.1765	108.295	2800.15	117.383	4.57594	7.39385e-42	7.2793e-40	Ifi209	1	173630917	173647928	+	3547	protein_coding	interferon activated gene 209 [Source:MGI Symbol;Acc:MGI:2138243]	-
ENSMUSG00000002307	4551.41	5064.04	4063.07	1900.43	3330.66	6617.28	391.582	416.266	463.606	496.005	376.988	388.587	4254.48	422.172	3.33301	7.74431e-42	7.59174e-40	Daxx	17	33909414	33915589	+	3058	protein_coding	Fas death domain-associated protein [Source:MGI Symbol;Acc:MGI:1197015]	-
ENSMUSG00000022146	4074.26	4048.01	2996.01	2520.45	2842.07	5052.91	408.645	411.975	555.01	708.246	439.07	483.231	3588.95	501.029	2.84041	8.22377e-42	8.02745e-40	Osmr	15	6813577	6874969	-	12113	protein_coding	oncostatin M receptor [Source:MGI Symbol;Acc:MGI:1330819]	-
ENSMUSG00000073490	6003.3	6951.23	4701.75	3613.3	3970.94	7229.83	521.256	772.452	539.364	796.874	557.835	880.919	5411.72	678.117	2.99659	9.60269e-42	9.33373e-40	Ifi207	1	173723427	173741747	-	3422	protein_coding	interferon activated gene 207 [Source:MGI Symbol;Acc:MGI:2138302]	-
ENSMUSG00000027405	1620.36	1460.66	1574.13	1551.35	1725.63	2081.28	613.393	550.158	589.595	599.405	613.618	634.298	1668.9	600.078	1.47574	1.2728e-41	1.23193e-39	Nop56	2	130274430	130279313	+	4099	protein_coding	NOP56 ribonucleoprotein [Source:MGI Symbol;Acc:MGI:1914384]	-
ENSMUSG00000035697	97.3772	153.913	94.1899	122.44	90.7571	134.35	460.685	592.213	779.814	679.481	684.697	694.361	115.505	648.542	-2.48699	1.55019e-41	1.49411e-39	Arhgap45	10	80016653	80031472	+	4478	protein_coding	Rho GTPase activating protein 45 [Source:MGI Symbol;Acc:MGI:1917969]	-
ENSMUSG00000004151	16.5541	12.0716	14.193	23.446	7.45949	13.6627	129.674	171.656	231.391	192.805	152.955	148.337	14.5645	171.136	-3.56023	1.83357e-41	1.75984e-39	Etv1	12	38779380	38870484	+	13296	protein_coding	ets variant 1 [Source:MGI Symbol;Acc:MGI:99254]	ETS
ENSMUSG00000039706	35.0558	24.1432	21.9346	31.2614	23.6217	30.741	194.511	181.955	140.811	167.927	170.05	220.23	27.793	179.247	-2.68218	2.42443e-41	2.31725e-39	Ldb2	5	44472132	44799680	-	3336	protein_coding	LIM domain binding 2 [Source:MGI Symbol;Acc:MGI:894670]	-
ENSMUSG00000034024	4901.97	4437.32	4496.6	4633.2	4361.32	5412.69	2267.59	2156.86	2313.91	2249.9	2267.33	2237.79	4707.18	2248.9	1.06573	2.73647e-41	2.60464e-39	Cct2	10	117051001	117063814	-	2557	protein_coding	chaperonin containing Tcp1, subunit 2 (beta) [Source:MGI Symbol;Acc:MGI:107186]	-
ENSMUSG00000037709	98.3509	88.5251	73.5455	45.5895	80.8112	53.5121	621.925	709.798	417.493	615.731	437.27	674.34	73.389	579.426	-2.97527	3.7423e-41	3.5473e-39	Fam13a	6	58932090	59024549	-	10505	protein_coding	family with sequence similarity 13, member A [Source:MGI Symbol;Acc:MGI:1889842]	-
ENSMUSG00000039756	1435.34	1442.56	1481.23	1509.66	1522.98	1515.42	751.599	728.68	629.945	738.566	684.697	628.838	1484.53	693.721	1.09706	3.91061e-41	3.69159e-39	Dnttip2	3	122274388	122285271	+	3309	protein_coding	deoxynucleotidyltransferase, terminal, interacting protein 2 [Source:MGI Symbol;Acc:MGI:1923173]	-
ENSMUSG00000003477	241.495	460.733	215.475	222.737	156.649	247.067	3032.84	7780.31	3453.58	6560.02	2627.22	5428.39	257.359	4813.73	-4.22413	4.21022e-41	3.95812e-39	Inmt	6	55170626	55175043	-	1600	protein_coding	indolethylamine N-methyltransferase [Source:MGI Symbol;Acc:MGI:102963]	-
ENSMUSG00000069874	9109.63	5893.96	7402.29	3721.41	5620.73	6920.14	534.906	734.688	900.862	1020	564.133	804.476	6444.69	759.844	3.08423	4.86637e-41	4.55631e-39	Irgm2	11	58199618	58222782	+	3690	protein_coding	immunity-related GTPase family M member 2 [Source:MGI Symbol;Acc:MGI:1926262]	-
ENSMUSG00000027580	4321.6	4922.19	2976.66	1612.57	2608.34	3494.23	302.858	342.454	331.853	416.707	222.234	301.223	3322.6	319.555	3.37803	5.34034e-41	4.97976e-39	Helz2	2	181227615	181242027	-	11529	protein_coding	helicase with zinc finger 2, transcriptional coactivator [Source:MGI Symbol;Acc:MGI:2385169]	-
ENSMUSG00000091649	1913.46	3076.25	1321.24	539.259	1140.06	2754.17	54.5997	74.6704	95.521	65.3048	61.1819	72.8032	1790.74	70.6802	4.66317	5.61324e-41	5.21304e-39	Phf11b	14	59320964	59341351	-	1184	protein_coding	PHD finger protein 11B [Source:MGI Symbol;Acc:MGI:3645789]	-
ENSMUSG00000047798	169.436	272.617	86.4482	130.256	145.46	145.735	3.41248	3.43312	5.7642	5.44206	3.59893	8.19036	158.325	4.97353	4.99676	5.86431e-41	5.42425e-39	Cd300lf	11	115116214	115133992	-	5149	protein_coding	CD300 molecule like family member F [Source:MGI Symbol;Acc:MGI:2442359]	-
ENSMUSG00000025492	30534.6	30548.2	27081.5	23021.4	21213.5	40247.9	3221.38	3632.24	6015.35	5096.1	3470.27	4382.75	28774.5	4303.02	2.74135	9.00382e-41	8.29473e-39	Ifitm3	7	141009586	141010770	-	678	protein_coding	interferon induced transmembrane protein 3 [Source:MGI Symbol;Acc:MGI:1913391]	-
ENSMUSG00000032649	14.6066	9.0537	18.0638	7.81535	21.1352	13.6627	237.167	185.389	138.341	140.716	218.635	258.451	14.0562	196.45	-3.81145	9.59857e-41	8.80726e-39	Colgalt2	1	152399830	152510695	+	4245	protein_coding	collagen beta(1-O)galactosyltransferase 2 [Source:MGI Symbol;Acc:MGI:2138232]	-
ENSMUSG00000028036	23.3705	27.1611	23.2249	16.9333	36.0542	23.9097	201.336	331.296	185.278	345.182	206.939	318.514	25.1089	264.758	-3.39715	1.36545e-40	1.24789e-38	Ptgfr	3	151796502	151837630	-	6778	protein_coding	prostaglandin F receptor [Source:MGI Symbol;Acc:MGI:97796]	-
ENSMUSG00000035678	262.918	209.241	175.477	164.122	145.46	170.783	29.8592	24.0318	29.6445	16.3262	25.1925	24.5711	188	24.9376	2.91991	1.80154e-40	1.6399e-38	Tnfsf9	17	57105325	57107757	+	1290	protein_coding	tumor necrosis factor (ligand) superfamily, member 9 [Source:MGI Symbol;Acc:MGI:1101058]	-
ENSMUSG00000015947	2222.15	2937.42	1803.8	1009.48	1077.9	2712.04	119.437	125.309	167.985	192.027	97.1712	134.686	1960.46	139.436	3.81303	2.18074e-40	1.97723e-38	Fcgr1	3	96282909	96293969	-	2589	protein_coding	Fc receptor, IgG, high affinity I [Source:MGI Symbol;Acc:MGI:95498]	-
ENSMUSG00000016262	14.6066	21.1253	3.87082	2.60512	4.97299	26.1868	370.254	383.651	569.832	658.49	430.072	394.047	12.2279	467.725	-5.22768	2.58267e-40	2.33244e-38	Sertad4	1	192844488	192855756	-	3850	protein_coding	SERTA domain containing 4 [Source:MGI Symbol;Acc:MGI:2443496]	-
ENSMUSG00000031216	255.128	233.384	176.767	158.912	144.217	129.795	827.527	929.518	966.738	1056.54	923.126	1062.02	183.034	960.911	-2.38828	3.03935e-40	2.7341e-38	Stard8	X	99003248	99074728	+	5499	protein_coding	START domain containing 8 [Source:MGI Symbol;Acc:MGI:2448556]	-
ENSMUSG00000026834	14.6066	26.1551	12.9027	14.3281	14.919	10.247	243.992	263.492	163.044	215.35	131.361	183.828	15.5264	200.178	-3.67542	3.30315e-40	2.95981e-38	Acvr1c	2	58267453	58357895	-	9292	protein_coding	activin A receptor, type IC [Source:MGI Symbol;Acc:MGI:2661081]	-
ENSMUSG00000068245	5409.3	6832.52	2888.92	1409.37	2214.23	6502.29	154.415	165.648	214.922	216.128	127.762	136.506	4209.44	169.23	4.63627	4.11615e-40	3.67394e-38	Phf11d	14	59347407	59365470	-	4498	protein_coding	PHD finger protein 11D [Source:MGI Symbol;Acc:MGI:1277133]	-
ENSMUSG00000037892	18.5017	43.2566	9.0319	24.7486	17.4055	20.494	214.986	223.153	228.921	216.128	245.627	245.711	22.2397	229.088	-3.3467	4.42942e-40	3.93823e-38	Pcdh18	3	49743296	49757325	-	5366	protein_coding	protocadherin 18 [Source:MGI Symbol;Acc:MGI:1920423]	-
ENSMUSG00000053175	2083.87	2098.45	1838.64	1258.27	1447.14	3323.44	138.205	144.191	252.801	194.359	108.868	101.924	2008.3	156.725	3.67884	5.68234e-40	5.03271e-38	Bcl3	7	19808462	19822770	-	2475	protein_coding	B cell leukemia/lymphoma 3 [Source:MGI Symbol;Acc:MGI:88140]	-
ENSMUSG00000033545	3104.38	3245.25	3278.58	3268.12	2813.47	3954.2	1111.62	947.541	819.34	792.987	1073.38	1101.15	3277.33	974.336	1.75035	5.9315e-40	5.23318e-38	Znrf1	8	111536097	111626030	+	7018	protein_coding	zinc and ring finger 1 [Source:MGI Symbol;Acc:MGI:2177308]	-
ENSMUSG00000036438	2968.06	3052.1	2713.44	3113.11	2802.28	3769.76	8303.42	8133.06	7577.45	7155.54	8340.53	7823.62	3069.79	7888.94	-1.36158	6.31956e-40	5.55419e-38	Calm2	17	87433412	87446935	-	1467	protein_coding	calmodulin 2 [Source:MGI Symbol;Acc:MGI:103250]	-
ENSMUSG00000024299	103.22	132.788	68.3844	78.1535	78.3247	87.6688	506.753	568.182	671.117	647.606	885.337	1009.23	91.4231	714.705	-2.96117	6.64602e-40	5.81882e-38	Adamts10	17	33524204	33553782	+	5453	protein_coding	a disintegrin-like and metallopeptidase (reprolysin type) with thrombospondin type 1 motif, 10 [Source:MGI Symbol;Acc:MGI:2449112]	-
ENSMUSG00000053641	2809.33	3369.99	2180.56	1736.31	1755.47	2402.35	230.342	271.217	328.559	412.042	172.749	242.071	2375.67	276.163	3.10423	6.91207e-40	6.02874e-38	Dennd4a	9	64811340	64919667	+	16643	protein_coding	DENN/MADD domain containing 4A [Source:MGI Symbol;Acc:MGI:2142979]	-
ENSMUSG00000002325	2767.46	2536.04	2869.57	2460.53	2654.34	2967.08	464.95	560.457	824.28	817.087	640.61	686.17	2709.17	665.593	2.02488	7.05513e-40	6.13021e-38	Irf9	14	55603571	55610030	+	5386	protein_coding	interferon regulatory factor 9 [Source:MGI Symbol;Acc:MGI:107587]	IRF
ENSMUSG00000020108	7364.63	5752.12	6759.74	9968.47	7747.92	4082.86	375.373	515.826	380.437	678.703	296.912	882.739	6945.96	521.665	3.73497	1.01109e-39	8.75226e-38	Ddit4	10	59949669	59951834	-	1755	protein_coding	DNA-damage-inducible transcript 4 [Source:MGI Symbol;Acc:MGI:1921997]	-
ENSMUSG00000029379	443.066	479.846	304.504	303.496	372.975	498.687	0	0	0	0	0	0	400.429	0	11.3195	1.10419e-39	9.52223e-38	Cxcl3	5	90786103	90789600	+	3498	protein_coding	chemokine (C-X-C motif) ligand 3 [Source:MGI Symbol;Acc:MGI:3037818]	-
ENSMUSG00000041057	2145.22	2011.93	1997.34	1785.81	1731.85	2569.72	696.999	708.939	692.527	733.901	705.391	614.277	2040.31	692.006	1.56004	1.34567e-39	1.15612e-37	Wdr43	17	71616215	71659031	+	3450	protein_coding	WD repeat domain 43 [Source:MGI Symbol;Acc:MGI:1919765]	-
ENSMUSG00000033538	4059.65	4514.78	2700.54	1789.71	2181.9	5043.8	164.652	202.554	298.091	321.859	145.757	140.146	3381.73	212.177	3.99383	1.51628e-39	1.29783e-37	Casp4	9	5308828	5336783	+	3710	protein_coding	caspase 4, apoptosis-related cysteine peptidase [Source:MGI Symbol;Acc:MGI:107700]	-
ENSMUSG00000020814	82.7706	122.728	50.3206	57.3125	32.3245	127.518	892.364	1043.67	1553.86	1477.91	1097.67	1204.89	78.8291	1211.73	-3.93682	1.61712e-39	1.379e-37	Mxra7	11	116803062	116828046	-	2391	protein_coding	matrix-remodelling associated 7 [Source:MGI Symbol;Acc:MGI:1914872]	-
ENSMUSG00000073491	876.394	1261.48	1096.73	310.009	686.273	1122.62	17.0624	21.457	32.1148	34.9847	40.488	64.6129	892.251	35.12	4.66928	2.21437e-39	1.88131e-37	Ifi213	1	173566283	173599274	-	6840	protein_coding	interferon activated gene 213 [Source:MGI Symbol;Acc:MGI:3695276]	-
ENSMUSG00000020423	5620.61	2998.79	7132.62	7412.86	5588.4	4029.35	689.321	585.347	764.992	930.593	727.884	658.869	5463.77	726.168	2.91129	2.45196e-39	2.07548e-37	Btg2	1	134075170	134079120	-	2743	protein_coding	B cell translocation gene 2, anti-proliferative [Source:MGI Symbol;Acc:MGI:108384]	-
ENSMUSG00000026536	5417.09	6133.38	3993.39	2399.31	2957.69	6514.81	264.467	351.037	448.784	526.325	242.928	341.265	4569.28	362.468	3.65579	2.62981e-39	2.21784e-37	Ifi211	1	173896345	173913046	-	1785	protein_coding	interferon activated gene 211 [Source:MGI Symbol;Acc:MGI:3041120]	-
ENSMUSG00000078763	573.551	840.988	381.921	296.983	462.488	662.639	33.2717	37.7643	36.2321	49.756	15.2955	42.7719	536.428	35.8486	3.90203	2.73424e-39	2.29746e-37	Slfn1	11	83116849	83122670	+	1864	protein_coding	schlafen 1 [Source:MGI Symbol;Acc:MGI:1313259]	-
ENSMUSG00000030921	4943.84	5609.27	3903.07	1874.38	2814.71	6117.46	294.326	315.847	419.963	475.014	327.503	385.857	4210.46	369.752	3.50928	3.51456e-39	2.94235e-37	Trim30a	7	104409025	104465193	-	4111	protein_coding	tripartite motif-containing 30A [Source:MGI Symbol;Acc:MGI:98178]	-
ENSMUSG00000030263	40.8984	35.2088	23.2249	40.3793	31.0812	25.0482	164.652	178.522	186.925	199.024	148.456	174.728	32.6401	175.384	-2.41902	4.47066e-39	3.72918e-37	Lrmp	6	145115653	145174934	+	4070	protein_coding	lymphoid-restricted membrane protein [Source:MGI Symbol;Acc:MGI:108424]	-
ENSMUSG00000028037	2131.59	1736.3	1229.63	547.074	1016.98	2512.79	46.9216	31.7564	95.521	83.9633	52.1845	45.502	1529.06	59.3081	4.687	4.79787e-39	3.98762e-37	Ifi44	3	151730922	151749960	-	6129	protein_coding	interferon-induced protein 44 [Source:MGI Symbol;Acc:MGI:2443016]	-
ENSMUSG00000046275	36.0295	72.4296	61.9331	46.8921	11.1892	30.741	803.639	1186.14	576.42	1306.87	729.684	873.639	43.2024	912.733	-4.39913	1.00755e-38	8.34379e-37	Tusc5	11	76679808	76698664	+	3302	protein_coding	tumor suppressor candidate 5 [Source:MGI Symbol;Acc:MGI:3029307]	-
ENSMUSG00000020130	2196.83	2062.23	2134.11	2313.34	2393.25	2468.39	974.263	1121.77	890.98	957.026	994.205	894.569	2261.36	972.136	1.21783	1.06829e-38	8.81489e-37	Tbc1d15	10	115197872	115251467	-	4261	protein_coding	TBC1 domain family, member 15 [Source:MGI Symbol;Acc:MGI:1913937]	-
ENSMUSG00000001473	4938.97	6157.52	4286.28	3984.52	3509.69	4893.51	1246.41	1100.32	1399.05	1156.05	1029.29	1076.58	4628.42	1167.95	1.98662	1.25782e-38	1.03416e-36	Tubb6	18	67390717	67402748	+	1757	protein_coding	tubulin, beta 6 class V [Source:MGI Symbol;Acc:MGI:1915201]	-
ENSMUSG00000008398	164.567	135.805	92.8996	126.348	90.7571	135.488	545.144	514.11	482.546	483.566	551.536	592.436	124.311	528.223	-2.08078	1.4196e-38	1.16301e-36	Elk3	10	93247414	93311135	-	4550	protein_coding	ELK3, member of ETS oncogene family [Source:MGI Symbol;Acc:MGI:101762]	ETS
ENSMUSG00000028270	44276.4	39127.1	23049.4	13172.8	17993.5	59265.2	685.055	643.71	1495.4	1575.87	426.473	617.007	32814.1	907.252	5.17654	1.51652e-38	1.23799e-36	Gbp2	3	142620602	142638008	+	2516	protein_coding	guanylate binding protein 2 [Source:MGI Symbol;Acc:MGI:102772]	-
novel.209	3092.7	2673.86	1563.81	1142.34	1479.47	2561.75	161.24	175.947	255.272	218.46	207.838	256.631	2085.65	212.565	3.29487	1.5991e-38	1.30077e-36	-	17	34995584	35000888	-	4608	-	- && P03391.1 RecName: Full=Envelope glycoprotein; AltName: Full=Env polyprotein; Contains: RecName: Full=Surface protein; Short=SU; AltName: Full=Glycoprotein 70; Short=gp70; Contains: RecName: Full=Transmembrane protein; Short=TM; AltName: Full=Envelope	-
ENSMUSG00000031659	72.0591	93.5549	50.3206	52.1023	50.9732	107.024	407.791	461.755	571.479	516.219	417.476	493.242	71.0057	477.994	-2.74359	1.91624e-38	1.55323e-36	Adcy7	8	88272403	88329962	+	6733	protein_coding	adenylate cyclase 7 [Source:MGI Symbol;Acc:MGI:102891]	-
ENSMUSG00000057367	3307.9	3604.38	2981.82	2537.38	2745.09	4313.99	686.762	685.766	809.458	957.026	860.145	754.423	3248.43	792.263	2.03573	2.49277e-38	2.01344e-36	Birc2	9	7818227	7837064	-	4580	protein_coding	baculoviral IAP repeat-containing 2 [Source:MGI Symbol;Acc:MGI:1197009]	-
ENSMUSG00000029096	704.037	984.841	530.302	511.905	392.867	774.218	3813.45	4949.7	4177.4	4740.04	3648.42	4453.74	649.695	4297.12	-2.72448	2.70845e-38	2.17997e-36	Htra3	5	35652023	35679782	-	4439	protein_coding	HtrA serine peptidase 3 [Source:MGI Symbol;Acc:MGI:1925808]	-
ENSMUSG00000034686	134.38	194.152	171.606	199.291	159.136	153.705	34.1248	28.3232	33.7617	22.5457	36.8891	35.4916	168.712	31.856	2.40781	3.32262e-38	2.66495e-36	Prr7	13	55464267	55473154	+	1359	protein_coding	proline rich 7 (synaptic) [Source:MGI Symbol;Acc:MGI:3487246]	-
ENSMUSG00000037624	10.7115	11.0656	10.3222	9.1179	7.45949	5.69278	138.205	164.79	108.696	87.073	145.757	172.908	9.06158	136.238	-3.90028	3.37252e-38	2.69555e-36	Kcnk2	1	189207930	189402273	-	4943	protein_coding	potassium channel, subfamily K, member 2 [Source:MGI Symbol;Acc:MGI:109366]	-
ENSMUSG00000085156	229.81	244.45	294.182	328.245	297.136	326.765	68.2496	60.0796	60.9358	72.3017	74.6778	85.5438	286.765	70.2981	2.02744	4.46544e-38	3.55669e-36	Snhg15	11	6525591	6528760	-	1359	processed_transcript	small nucleolar RNA host gene 15 [Source:MGI Symbol;Acc:MGI:3650059]	-
ENSMUSG00000036067	519.994	846.018	556.107	306.101	452.542	742.338	31.5654	29.1815	73.2877	24.878	34.1899	32.7614	570.517	37.644	3.92163	5.74708e-38	4.56167e-36	Slc2a6	2	27021363	27027998	-	3211	protein_coding	solute carrier family 2 (facilitated glucose transporter), member 6 [Source:MGI Symbol;Acc:MGI:2443286]	-
ENSMUSG00000020572	11519.7	12053.5	10891.2	10096.1	9988.26	13655.8	4431.96	3722.36	3364.65	3072.43	3994.82	3718.42	11367.4	3717.44	1.61263	6.82193e-38	5.39615e-36	Nampt	12	32819545	32853349	+	5054	protein_coding	nicotinamide phosphoribosyltransferase [Source:MGI Symbol;Acc:MGI:1929865]	-
ENSMUSG00000059479	16.5541	12.0716	7.74163	6.51279	18.6487	20.494	138.205	147.624	215.746	258.109	152.055	185.648	13.6705	182.898	-3.72886	8.77299e-38	6.91559e-36	B3gnt8	7	25626654	25635100	+	6474	protein_coding	UDP-GlcNAc:betaGal beta-1,3-N-acetylglucosaminyltransferase 8 [Source:MGI Symbol;Acc:MGI:2385269]	-
ENSMUSG00000032596	1851.14	2251.35	1561.23	1275.2	1603.79	2462.7	296.033	293.532	423.257	380.167	260.023	282.112	1834.24	322.521	2.50747	8.90724e-38	6.99737e-36	Uba7	9	107975505	107984060	+	6692	protein_coding	ubiquitin-like modifier activating enzyme 7 [Source:MGI Symbol;Acc:MGI:1349462]	-
ENSMUSG00000022876	869.578	976.793	514.819	248.789	506.002	970.049	41.8029	40.3392	55.9951	38.8719	26.992	40.9518	681.005	40.8255	4.05996	1.05652e-37	8.27148e-36	Samsn1	16	75858793	76022281	-	4935	protein_coding	SAM domain, SH3 domain and nuclear localization signals, 1 [Source:MGI Symbol;Acc:MGI:1914992]	-
ENSMUSG00000028834	22871.9	21937.1	18796.7	36136.9	32624.1	15277.1	3438.93	3065.78	1431.99	2253.79	2862.05	2200.48	24607.3	2542.17	3.27496	1.07816e-37	8.41218e-36	Trim63	4	134315120	134329629	+	2842	protein_coding	tripartite motif-containing 63 [Source:MGI Symbol;Acc:MGI:2447992]	-
ENSMUSG00000074794	5659.56	3785.45	4423.05	4413.07	5367.1	3851.73	1112.47	1241.07	797.106	1242.35	1266.82	1143.92	4583.33	1133.96	2.01509	1.08837e-37	8.46311e-36	Arrdc3	13	80883384	80896042	+	6266	protein_coding	arrestin domain containing 3 [Source:MGI Symbol;Acc:MGI:2145242]	-
ENSMUSG00000029298	7234.15	6871.76	3710.82	2162.25	3161.58	8155.47	389.023	357.903	398.553	415.152	281.616	394.957	5216	372.867	3.80622	1.6756e-37	1.29853e-35	Gbp9	5	105077630	105139539	-	5173	protein_coding	guanylate-binding protein 9 [Source:MGI Symbol;Acc:MGI:3605620]	-
ENSMUSG00000051439	6338.28	6174.62	3495.35	3338.46	2710.28	6691.29	298.592	331.296	599.477	491.341	269.02	424.079	4791.38	402.301	3.57396	2.13379e-37	1.64805e-35	Cd14	18	36725074	36726736	-	1572	protein_coding	CD14 antigen [Source:MGI Symbol;Acc:MGI:88318]	-
ENSMUSG00000004100	824.785	1020.05	1030.93	1230.92	1186.06	1450.52	296.033	250.618	302.209	272.103	321.205	323.064	1123.88	294.205	1.93349	2.34383e-37	1.8042e-35	Ppan	9	20888175	20892178	+	4004	protein_coding	peter pan homolog [Source:MGI Symbol;Acc:MGI:2178445]	-
ENSMUSG00000041449	192.807	270.605	163.865	106.81	131.784	158.259	7.67808	1.71656	5.7642	7.77438	1.79947	0	170.688	4.12211	5.34676	2.5382e-37	1.94728e-35	Serpina3h	12	104247905	104253669	+	1434	transcribed_unprocessed_pseudogene	serine (or cysteine) peptidase inhibitor, clade A, member 3H [Source:MGI Symbol;Acc:MGI:2182839]	-
ENSMUSG00000063785	586.21	594.526	636.104	689.053	595.516	676.302	250.817	290.957	238.803	254.222	278.917	263.002	629.619	262.786	1.26026	3.14572e-37	2.40532e-35	Utp14a	X	48256862	48282453	+	4130	protein_coding	UTP14A small subunit processome component [Source:MGI Symbol;Acc:MGI:1919804]	-
ENSMUSG00000037580	1885.22	2009.92	1783.16	1161.88	1240.76	2657.39	150.149	310.697	125.989	141.494	160.152	146.516	1789.72	172.5	3.37541	3.70499e-37	2.82355e-35	Gch1	14	47153895	47189413	-	6251	protein_coding	GTP cyclohydrolase 1 [Source:MGI Symbol;Acc:MGI:95675]	-
ENSMUSG00000073489	13259.8	16470.7	9422.86	6129.84	7642.25	17250.3	770.368	938.1	1156.13	1420.38	628.913	893.659	11696	967.926	3.59487	3.99203e-37	3.03223e-35	Ifi204	1	173747293	173766943	-	3561	protein_coding	interferon activated gene 204 [Source:MGI Symbol;Acc:MGI:96429]	-
ENSMUSG00000006818	20354.7	20183.7	17210.9	14681.1	15211.1	22481.9	4562.49	4508.55	3126.67	3004.02	4902.65	4208.94	18353.9	4052.22	2.17939	4.92739e-37	3.73034e-35	Sod2	17	13006846	13040063	+	10008	protein_coding	superoxide dismutase 2, mitochondrial [Source:MGI Symbol;Acc:MGI:98352]	-
ENSMUSG00000048621	215.204	228.354	169.026	70.3381	113.136	247.067	6.82496	4.2914	4.94074	5.44206	4.49867	10.0104	173.854	6.00138	4.86384	5.49017e-37	4.14273e-35	Gm6377	X	109196756	109200439	+	2795	protein_coding	predicted gene 6377 [Source:MGI Symbol;Acc:MGI:3647255]	-
ENSMUSG00000037944	264.866	286.7	263.216	128.953	126.811	157.121	14.503	6.00796	10.7049	3.88719	2.6992	8.19036	204.611	7.66545	4.73964	5.72841e-37	4.30833e-35	Ccr7	11	99144196	99155077	-	1978	protein_coding	chemokine (C-C motif) receptor 7 [Source:MGI Symbol;Acc:MGI:103011]	-
ENSMUSG00000004043	1235.72	1578.36	1090.28	1125.41	1074.17	1367.41	428.266	430.857	392.789	413.597	345.498	381.307	1245.22	398.719	1.64338	9.19662e-37	6.89416e-35	Stat5a	11	100859351	100885169	+	7133	protein_coding	signal transducer and activator of transcription 5A [Source:MGI Symbol;Acc:MGI:103036]	STAT
ENSMUSG00000068606	3062.51	1696.06	5324.95	2013.75	2232.87	3493.09	135.646	47.2054	134.223	49.756	151.155	192.018	2970.54	118.334	4.65062	1.22036e-36	9.11849e-35	Gm4841	18	60268301	60273267	-	2838	protein_coding	predicted gene 4841 [Source:MGI Symbol;Acc:MGI:3643814]	-
ENSMUSG00000112023	1052.65	1340.95	1027.06	864.898	942.382	1453.94	90.4307	158.782	129.283	99.512	160.152	227.51	1113.65	144.278	2.94994	1.33176e-36	9.91861e-35	Lilr4b	10	51480632	51486703	+	5439	protein_coding	leukocyte immunoglobulin-like receptor, subfamily B, member 4B [Source:MGI Symbol;Acc:MGI:102702]	-
ENSMUSG00000049401	4010.97	5109.3	3786.95	3488.25	3413.96	5523.13	1067.25	1094.31	1200.6	1310.76	1059.89	1089.32	4222.09	1137.02	1.89273	1.53739e-36	1.1413e-34	Ogfr	2	180589245	180595836	+	2580	protein_coding	opioid growth factor receptor [Source:MGI Symbol;Acc:MGI:1919325]	-
ENSMUSG00000045165	24.3443	35.2088	9.0319	11.723	12.4325	22.7711	201.336	190.538	285.74	203.689	211.437	204.759	19.2519	216.25	-3.45961	1.69679e-36	1.25557e-34	AI467606	7	127091359	127093986	+	1932	protein_coding	expressed sequence AI467606 [Source:MGI Symbol;Acc:MGI:2141979]	-
ENSMUSG00000036062	118.8	173.026	147.091	164.122	164.109	204.94	28.153	19.7404	31.2914	31.0975	21.5936	31.8514	162.015	27.2879	2.56691	2.33616e-36	1.72313e-34	Phf24	4	42916660	42944752	+	7118	protein_coding	PHD finger protein 24 [Source:MGI Symbol;Acc:MGI:2140712]	-
ENSMUSG00000035356	5086.98	4891.01	3019.24	2340.7	2700.34	5636.99	149.296	180.239	251.978	500.67	233.931	195.659	3945.87	251.962	3.96855	2.52917e-36	1.8595e-34	Nfkbiz	16	55811375	55838899	-	5018	protein_coding	nuclear factor of kappa light polypeptide gene enhancer in B cells inhibitor, zeta [Source:MGI Symbol;Acc:MGI:1931595]	-
ENSMUSG00000040511	1656.39	1199.11	922.545	1309.07	823.031	1401.56	273.852	239.46	251.154	233.231	291.514	232.06	1218.62	253.545	2.26559	5.0129e-36	3.67383e-34	Pvr	7	19903578	19921160	-	6122	protein_coding	poliovirus receptor [Source:MGI Symbol;Acc:MGI:107741]	-
ENSMUSG00000035172	101.272	50.2983	90.319	84.6663	124.325	39.8494	590.359	625.686	578.89	619.618	719.786	666.149	81.7884	633.415	-2.95608	5.1344e-36	3.75089e-34	Plekhh3	11	101162679	101171351	-	3582	protein_coding	pleckstrin homology domain containing, family H (with MyTH4 domain) member 3 [Source:MGI Symbol;Acc:MGI:2384950]	-
ENSMUSG00000054520	946.506	1256.45	1274.79	920.908	1204.71	847.085	210.721	237.744	316.207	242.561	172.749	201.119	1075.07	230.183	2.22275	5.8105e-36	4.23134e-34	Sh3bp2	5	34525838	34563641	+	4296	protein_coding	SH3-domain binding protein 2 [Source:MGI Symbol;Acc:MGI:1346349]	-
ENSMUSG00000001288	226.889	152.907	125.156	115.928	129.298	179.892	685.909	887.462	1119.9	1016.89	779.169	768.984	155.012	876.386	-2.49519	6.45205e-36	4.68366e-34	Rarg	15	102234938	102257517	-	4261	protein_coding	retinoic acid receptor, gamma [Source:MGI Symbol;Acc:MGI:97858]	THR-like
ENSMUSG00000028427	33.1082	20.1193	34.8373	37.7742	22.3785	23.9097	387.317	356.186	169.632	227.012	335.6	450.47	28.6879	321.036	-3.48847	6.60352e-36	4.77849e-34	Aqp7	4	41033074	41048139	-	2828	protein_coding	aquaporin 7 [Source:MGI Symbol;Acc:MGI:1314647]	-
ENSMUSG00000025591	658.27	662.932	659.329	517.115	675.084	794.712	210.721	236.027	200.923	173.369	215.036	227.51	661.24	210.598	1.6521	6.98276e-36	5.03703e-34	Tma16	8	66473118	66486530	-	7641	protein_coding	translation machinery associated 16 [Source:MGI Symbol;Acc:MGI:1913532]	-
ENSMUSG00000028793	4348.86	4655.61	4226.93	2734.07	2481.52	4421.01	898.336	788.76	790.519	854.404	692.794	818.126	3811.34	807.156	2.23948	7.78345e-36	5.59701e-34	Rnf19b	4	129058271	129085886	+	2872	protein_coding	ring finger protein 19B [Source:MGI Symbol;Acc:MGI:1922484]	-
ENSMUSG00000024912	435.276	263.563	218.056	251.394	207.623	492.995	25.5936	31.7564	24.7037	38.8719	21.5936	19.1108	311.484	26.9383	3.52875	9.03412e-36	6.47606e-34	Fosl1	19	5447703	5455945	+	1707	protein_coding	fos-like antigen 1 [Source:MGI Symbol;Acc:MGI:107179]	TF_bZIP
ENSMUSG00000099974	327.187	383.273	268.377	252.696	200.163	326.765	15.3562	22.3153	46.937	30.3201	36.8891	38.2217	293.077	31.6732	3.21166	9.61977e-36	6.87439e-34	Bcl2a1d	9	88723285	88731914	-	863	protein_coding	B cell leukemia/lymphoma 2 related protein A1d [Source:MGI Symbol;Acc:MGI:1278325]	-
ENSMUSG00000020227	4197.93	5014.74	2786.99	2356.33	2210.5	4482.49	349.779	427.424	363.145	478.124	189.844	352.186	3508.16	360.083	3.28415	1.08122e-35	7.7025e-34	Irak3	10	120141648	120202130	-	3676	protein_coding	interleukin-1 receptor-associated kinase 3 [Source:MGI Symbol;Acc:MGI:1921164]	-
ENSMUSG00000041075	318.423	343.035	205.153	188.871	218.812	204.94	2183.13	1962.89	1710.32	2208.7	1424.28	1053.83	246.539	1757.19	-2.83124	1.19872e-35	8.51317e-34	Fzd7	1	59482424	59486955	+	4532	protein_coding	frizzled class receptor 7 [Source:MGI Symbol;Acc:MGI:108570]	-
ENSMUSG00000043496	14.6066	30.179	15.4833	10.4205	28.5947	25.0482	221.811	163.073	168.809	258.887	196.142	160.167	20.722	194.815	-3.22518	1.21473e-35	8.60025e-34	Tril	6	53815468	53820830	-	5363	protein_coding	TLR4 interactor with leucine-rich repeats [Source:MGI Symbol;Acc:MGI:1914123]	-
ENSMUSG00000063065	538.496	515.055	572.881	505.392	486.11	588.633	1612.4	1780.07	2369.09	2730.36	1751.78	1821.9	534.428	2010.93	-1.91191	1.22937e-35	8.6771e-34	Mapk3	7	126759601	126765819	+	2257	protein_coding	mitogen-activated protein kinase 3 [Source:MGI Symbol;Acc:MGI:1346859]	-
ENSMUSG00000006362	47.7148	56.3341	70.965	69.0356	92.0004	54.6507	367.695	342.454	280.799	327.301	257.324	291.213	65.1168	311.131	-2.26545	1.33084e-35	9.36447e-34	Cbfa2t3	8	122625141	122699109	-	8373	protein_coding	core-binding factor, runt domain, alpha subunit 2, translocated to, 3 (human) [Source:MGI Symbol;Acc:MGI:1338013]	-
ENSMUSG00000024803	1623.28	2176.91	2427	867.504	1322.82	653.531	60.5715	128.742	107.873	117.393	104.369	74.6233	1511.84	98.9286	3.9334	1.3959e-35	9.79223e-34	Ankrd1	19	36111965	36119844	-	1765	protein_coding	ankyrin repeat domain 1 (cardiac muscle) [Source:MGI Symbol;Acc:MGI:1097717]	-
ENSMUSG00000022500	4567.96	4528.86	3922.43	3484.34	3176.5	5032.42	662.021	672.892	1108.37	1061.2	712.589	705.281	4118.75	820.393	2.32765	1.55685e-35	1.0888e-33	Litaf	16	10959275	11066157	-	5156	protein_coding	LPS-induced TN factor [Source:MGI Symbol;Acc:MGI:1929512]	zf-LITAF-like
ENSMUSG00000034422	8298.48	7985.36	5832.03	3226.44	4449.59	7508.77	499.075	504.669	801.224	918.931	425.574	563.315	6216.78	618.798	3.32846	1.80718e-35	1.26003e-33	Parp14	16	35832874	35871544	-	9306	protein_coding	poly (ADP-ribose) polymerase family, member 14 [Source:MGI Symbol;Acc:MGI:1919489]	-
ENSMUSG00000033318	50.6361	62.3699	51.6109	70.3381	42.2704	108.163	347.22	472.054	436.432	499.115	368.891	519.633	64.2314	440.557	-2.77762	1.82326e-35	1.26739e-33	Gstt2	10	75831114	75837424	-	4156	protein_coding	glutathione S-transferase, theta 2 [Source:MGI Symbol;Acc:MGI:106188]	-
ENSMUSG00000042726	5039.27	6153.5	4709.49	3420.52	3972.18	6115.18	1095.41	1188.72	1264.83	1340.3	1306.41	1224	4901.69	1236.61	1.98701	2.46154e-35	1.7059e-33	Trafd1	5	121371725	121385632	-	4486	protein_coding	TRAF type zinc finger domain containing 1 [Source:MGI Symbol;Acc:MGI:1923551]	-
ENSMUSG00000079614	2229.94	1920.39	1954.76	1983.8	2092.39	2410.32	877.861	840.256	918.155	980.349	960.015	793.555	2098.6	895.032	1.22936	2.77062e-35	1.91432e-33	Seh1l	18	67774876	67795461	+	3516	protein_coding	SEH1-like (S. cerevisiae [Source:MGI Symbol;Acc:MGI:1919374]	-
ENSMUSG00000021822	509.283	714.236	529.012	739.853	607.949	801.543	2123.42	2181.75	2061.94	2050.1	2119.77	2583.6	650.312	2186.76	-1.74966	2.99961e-35	2.06631e-33	Plau	14	20836660	20843385	+	2367	protein_coding	plasminogen activator, urokinase [Source:MGI Symbol;Acc:MGI:97611]	-
ENSMUSG00000030551	139.249	131.782	147.091	118.533	89.5139	117.271	386.463	378.502	386.201	412.819	385.086	460.48	123.907	401.592	-1.69393	3.97782e-35	2.73195e-33	Nr2f2	7	70351944	70366735	-	8625	protein_coding	nuclear receptor subfamily 2, group F, member 2 [Source:MGI Symbol;Acc:MGI:1352452]	RXR-like
ENSMUSG00000034266	317.45	399.369	313.536	192.779	221.298	286.916	41.8029	43.7723	43.6432	55.9755	37.7888	57.3325	288.558	46.7192	2.62799	4.43983e-35	3.04015e-33	Batf	12	85686669	85709087	+	1406	protein_coding	basic leucine zipper transcription factor, ATF-like [Source:MGI Symbol;Acc:MGI:1859147]	TF_bZIP
ENSMUSG00000028862	3126.78	2896.18	2197.33	3127.44	2566.06	2464.97	241.433	320.997	434.785	586.188	203.34	313.964	2729.8	350.118	2.96224	4.67691e-35	3.19297e-33	Map3k6	4	133240818	133252929	+	4604	protein_coding	mitogen-activated protein kinase kinase kinase 6 [Source:MGI Symbol;Acc:MGI:1855691]	-
ENSMUSG00000053338	131.459	205.217	118.705	93.7842	72.1084	120.687	1.70624	0	4.94074	1.55488	2.6992	3.64016	123.66	2.42354	5.68099	4.93889e-35	3.36182e-33	Tarm1	7	3486500	3502624	-	2066	protein_coding	T cell-interacting, activating receptor on myeloid cells 1 [Source:MGI Symbol;Acc:MGI:2442280]	-
ENSMUSG00000030022	5726.75	3921.26	1886.38	1757.15	1633.63	4253.64	185.98	147.624	183.631	296.204	129.562	187.468	3196.47	188.411	4.08422	5.10908e-35	3.46737e-33	Adamts9	6	92772699	92943492	-	15048	protein_coding	a disintegrin-like and metallopeptidase (reprolysin type) with thrombospondin type 1 motif, 9 [Source:MGI Symbol;Acc:MGI:1916320]	-
ENSMUSG00000018583	5190.2	4895.03	4652.72	5043.5	5302.45	5467.34	2497.08	2228.95	2212.63	2052.44	2649.71	2184.1	5091.88	2304.15	1.14411	5.17034e-35	3.49069e-33	G3bp1	11	55469685	55504838	+	7064	protein_coding	GTPase activating protein (SH3 domain) binding protein 1 [Source:MGI Symbol;Acc:MGI:1351465]	-
ENSMUSG00000062488	4214.48	4571.11	2740.54	837.545	1914.6	4867.32	107.493	149.341	206.688	192.027	154.754	147.427	3190.93	159.622	4.32112	5.17388e-35	3.49069e-33	Ifit3b	19	34607970	34613401	+	2000	protein_coding	interferon-induced protein with tetratricopeptide repeats 3B [Source:MGI Symbol;Acc:MGI:3698419]	-
ENSMUSG00000015437	250.259	291.73	322.568	126.348	185.244	135.488	0.85312	0	0	0	0.899733	6.37028	218.606	1.35386	7.40079	1.05694e-34	7.11e-33	Gzmb	14	56258838	56262260	-	1436	protein_coding	granzyme B [Source:MGI Symbol;Acc:MGI:109267]	-
ENSMUSG00000022651	135.354	224.331	126.447	148.492	140.487	111.578	7.67808	10.2994	0.823457	9.32925	9.89706	14.5606	147.781	8.76464	4.08564	1.13474e-34	7.61103e-33	Retnlg	16	48872621	48874496	+	593	protein_coding	resistin like gamma [Source:MGI Symbol;Acc:MGI:2667763]	-
ENSMUSG00000020250	5687.8	4948.35	5065.61	4764.76	4521.69	5228.25	1939.14	1867.62	1454.22	1367.51	1913.73	1902.89	5036.08	1740.85	1.53278	1.14092e-34	7.63016e-33	Txnrd1	10	82833951	82897712	+	7086	protein_coding	thioredoxin reductase 1 [Source:MGI Symbol;Acc:MGI:1354175]	-
ENSMUSG00000001270	119.774	148.883	150.962	155.004	53.4597	89.9459	822.408	770.736	1236.83	890.166	853.847	1104.79	119.671	946.463	-2.98339	1.19059e-34	7.93926e-33	Ckb	12	111669361	111672338	-	2895	protein_coding	creatine kinase, brain [Source:MGI Symbol;Acc:MGI:88407]	-
ENSMUSG00000033170	75.9542	54.3222	36.1276	29.9588	29.838	46.6808	455.566	489.22	657.119	831.081	327.503	423.169	45.4803	530.61	-3.53426	1.36423e-34	9.07076e-33	Card10	15	78775138	78803042	-	4952	protein_coding	caspase recruitment domain family, member 10 [Source:MGI Symbol;Acc:MGI:2146012]	-
ENSMUSG00000029798	2238.7	2357.99	1584.45	573.125	1106.49	2640.31	63.1309	81.5366	131.753	143.826	81.8757	76.4434	1750.18	96.4276	4.18114	1.49449e-34	9.90813e-33	Herc6	6	57581000	57664632	+	9292	protein_coding	hect domain and RLD 6 [Source:MGI Symbol;Acc:MGI:1914388]	-
ENSMUSG00000026104	1725.52	1790.62	2188.3	1309.07	1597.57	2237.26	441.063	456.605	556.657	464.908	419.276	547.844	1808.06	481.059	1.91021	2.31125e-34	1.52789e-32	Stat1	1	52119440	52161865	+	7105	protein_coding	signal transducer and activator of transcription 1 [Source:MGI Symbol;Acc:MGI:103063]	STAT
ENSMUSG00000026875	400.22	407.416	350.954	259.209	253.623	407.603	29.8592	34.3312	65.0531	32.6524	46.7861	62.7928	346.504	45.2458	2.93985	3.38127e-34	2.22882e-32	Traf1	2	34941750	34961772	-	8819	protein_coding	TNF receptor-associated factor 1 [Source:MGI Symbol;Acc:MGI:101836]	-
ENSMUSG00000041506	1141.26	988.865	1119.96	969.103	1075.41	1370.82	429.973	420.557	446.314	428.368	460.663	459.57	1110.9	440.908	1.33353	3.87364e-34	2.54606e-32	Rrp9	9	106475963	106485424	+	2933	protein_coding	RRP9, small subunit (SSU) processome component, homolog (yeast) [Source:MGI Symbol;Acc:MGI:2384313]	-
ENSMUSG00000036053	4149.24	4983.56	2251.52	1884.8	2063.79	3482.84	441.063	378.502	405.964	422.926	306.809	378.577	3135.96	388.973	3.01127	4.80152e-34	3.14692e-32	Fmnl2	2	52857860	53133804	+	5636	protein_coding	formin-like 2 [Source:MGI Symbol;Acc:MGI:1918659]	-
ENSMUSG00000011256	56.4788	56.3341	27.0957	29.9588	33.5677	23.9097	262.761	273.791	256.919	261.997	205.139	277.562	37.8908	256.361	-2.74107	4.92414e-34	3.21809e-32	Adam19	11	46055992	46147343	+	7115	protein_coding	a disintegrin and metallopeptidase domain 19 (meltrin beta) [Source:MGI Symbol;Acc:MGI:105377]	-
ENSMUSG00000021379	14.6066	20.1193	12.9027	9.1179	19.892	15.9398	148.443	115.01	164.691	144.603	92.6725	122.855	15.4297	131.379	-3.07989	5.01468e-34	3.26794e-32	Id4	13	48261228	48266026	+	3849	protein_coding	inhibitor of DNA binding 4 [Source:MGI Symbol;Acc:MGI:99414]	bHLH
ENSMUSG00000025929	222.994	216.283	259.345	135.466	221.298	278.946	0	0	0	0	0	0	222.389	0	10.4704	6.9627e-34	4.52457e-32	Il17a	1	20730905	20734496	+	1171	protein_coding	interleukin 17A [Source:MGI Symbol;Acc:MGI:107364]	-
ENSMUSG00000023473	174.305	226.342	282.57	274.84	266.055	163.952	27.2998	42.914	16.4691	23.3231	26.992	37.3116	231.344	29.0516	2.99524	8.41023e-34	5.44978e-32	Celsr3	9	108826320	108852969	+	12063	protein_coding	cadherin, EGF LAG seven-pass G-type receptor 3 [Source:MGI Symbol;Acc:MGI:1858236]	-
ENSMUSG00000047407	477.148	456.709	539.334	528.838	382.921	444.037	129.674	133.033	135.87	121.28	162.852	175.638	471.498	143.058	1.72195	8.93189e-34	5.77151e-32	Tgif1	17	70844205	70853546	-	5625	protein_coding	TGFB-induced factor homeobox 1 [Source:MGI Symbol;Acc:MGI:1194497]	Homeobox
ENSMUSG00000028565	273.63	313.862	256.764	273.537	377.948	323.35	826.673	797.342	949.446	1064.31	999.603	1035.63	303.182	945.501	-1.64088	9.40354e-34	6.0592e-32	Nfia	4	97772734	98118874	+	10891	protein_coding	nuclear factor I/A [Source:MGI Symbol;Acc:MGI:108056]	CTF/NFI
ENSMUSG00000034640	6377.23	6514.64	5834.61	8238.68	6841.6	5888.61	1608.13	1109.76	1047.44	1165.38	732.383	597.896	6615.89	1043.5	2.66434	9.98274e-34	6.4144e-32	Tiparp	3	65528410	65555518	+	4358	protein_coding	TCDD-inducible poly(ADP-ribose) polymerase [Source:MGI Symbol;Acc:MGI:2159210]	-
ENSMUSG00000047731	6539.85	5603.23	6203.63	8180.06	6835.38	4227.46	1743.78	1894.22	1501.99	1739.91	1464.77	1484.28	6264.94	1638.16	1.93511	1.11813e-33	7.16449e-32	Wbp1l	19	46599084	46657389	+	4463	protein_coding	WW domain binding protein 1 like [Source:MGI Symbol;Acc:MGI:107577]	-
ENSMUSG00000022791	304.791	305.814	270.957	205.804	325.731	202.663	1104.79	1029.94	904.979	1328.64	954.617	1007.41	269.293	1055.06	-1.96897	1.24036e-33	7.92551e-32	Tnk2	16	32643874	32683493	+	5738	protein_coding	tyrosine kinase, non-receptor, 2 [Source:MGI Symbol;Acc:MGI:1858308]	-
ENSMUSG00000041515	1848.22	1189.05	2030.89	1378.11	1171.14	1669.12	244.845	278.941	424.08	299.314	248.326	320.334	1547.75	302.64	2.35426	1.31124e-33	8.35516e-32	Irf8	8	120736358	120756694	+	7055	protein_coding	interferon regulatory factor 8 [Source:MGI Symbol;Acc:MGI:96395]	IRF
ENSMUSG00000032946	33.1082	38.2267	46.4498	39.0767	29.838	23.9097	296.886	277.225	198.453	195.137	345.498	432.269	35.1015	290.911	-3.05327	1.71062e-33	1.08698e-31	Rasgrp2	19	6399340	6415216	+	12384	protein_coding	RAS, guanyl releasing protein 2 [Source:MGI Symbol;Acc:MGI:1333849]	-
ENSMUSG00000061458	730.329	622.693	509.657	524.931	615.408	712.736	213.28	211.995	204.217	206.021	181.746	162.897	619.292	196.693	1.65516	1.79928e-33	1.14016e-31	Nol10	12	17348458	17430095	+	3021	protein_coding	nucleolar protein 10 [Source:MGI Symbol;Acc:MGI:2684913]	-
ENSMUSG00000022906	5191.18	5573.05	3459.22	2167.46	2725.2	6065.08	501.635	460.038	552.54	635.944	413.877	429.539	4196.87	498.929	3.07234	1.88896e-33	1.19369e-31	Parp9	16	35938470	35972605	+	4872	protein_coding	poly (ADP-ribose) polymerase family, member 9 [Source:MGI Symbol;Acc:MGI:1933117]	-
ENSMUSG00000036661	1010.77	827.91	597.396	450.685	528.381	1113.51	111.759	108.143	116.931	97.1797	107.968	117.395	754.776	109.896	2.78103	2.15638e-33	1.35893e-31	Dennd3	15	73512560	73572242	+	5709	protein_coding	DENN/MADD domain containing 3 [Source:MGI Symbol;Acc:MGI:2146009]	-
ENSMUSG00000020638	4400.47	7564.87	2965.05	1215.29	2042.66	5247.6	228.636	192.255	214.922	244.893	211.437	231.15	3905.99	220.549	4.14659	2.70239e-33	1.69836e-31	Cmpk2	12	26469204	26479837	+	4163	protein_coding	cytidine monophosphate (UMP-CMP) kinase 2, mitochondrial [Source:MGI Symbol;Acc:MGI:99830]	-
ENSMUSG00000046447	522.915	610.622	550.946	556.192	616.651	546.507	1293.33	1851.31	1548.1	1844.08	1412.58	1843.74	567.306	1632.19	-1.52473	2.77849e-33	1.74141e-31	Camk2n1	4	138454314	138460123	+	4444	protein_coding	calcium/calmodulin-dependent protein kinase II inhibitor 1 [Source:MGI Symbol;Acc:MGI:1913509]	-
ENSMUSG00000003948	437.223	478.84	656.748	373.834	355.569	600.019	2089.29	2331.95	1624.68	2123.18	2262.83	2191.38	483.706	2103.88	-2.12089	3.30519e-33	2.06588e-31	Mmd	11	90249456	90278589	+	3581	protein_coding	monocyte to macrophage differentiation-associated [Source:MGI Symbol;Acc:MGI:1914718]	-
ENSMUSG00000063268	2555.18	3014.88	2059.27	1241.34	1624.93	2578.83	329.304	353.611	387.025	429.923	255.524	329.435	2179.07	347.47	2.64869	4.28886e-33	2.67343e-31	Parp10	15	76231174	76243441	-	4275	protein_coding	poly (ADP-ribose) polymerase family, member 10 [Source:MGI Symbol;Acc:MGI:3712326]	-
ENSMUSG00000027858	39.9246	15.0895	5.16109	11.723	11.1892	18.2169	313.948	284.091	188.572	294.649	369.79	331.255	16.8841	297.051	-4.10881	4.64713e-33	2.8889e-31	Tspan2	3	102734529	102801513	+	4755	protein_coding	tetraspanin 2 [Source:MGI Symbol;Acc:MGI:1917997]	-
ENSMUSG00000024818	28.2394	33.1969	18.0638	19.5384	26.1082	21.6326	117.731	153.632	139.988	188.14	136.759	180.188	24.4632	152.74	-2.62759	5.37447e-33	3.33203e-31	Slc25a45	19	5877808	5885766	+	2650	protein_coding	solute carrier family 25, member 45 [Source:MGI Symbol;Acc:MGI:2147731]	-
ENSMUSG00000043122	16.5541	41.2446	28.386	10.4205	12.4325	11.3856	639.84	979.298	349.969	757.224	296.012	330.345	20.0705	558.781	-4.79149	5.47281e-33	3.38385e-31	A530016L24Rik	12	112489448	112499927	+	3110	protein_coding	RIKEN cDNA A530016L24 gene [Source:MGI Symbol;Acc:MGI:2443020]	-
ENSMUSG00000037872	1223.06	1294.68	612.879	657.792	724.814	726.398	127.968	145.908	152.34	99.512	130.461	148.337	873.27	134.088	2.70465	5.63446e-33	3.47443e-31	Ackr1	1	173331886	173333750	-	1405	protein_coding	atypical chemokine receptor 1 (Duffy blood group) [Source:MGI Symbol;Acc:MGI:1097689]	-
ENSMUSG00000040855	32.1345	50.2983	24.5152	22.1435	24.865	42.1266	342.954	448.881	377.967	413.597	232.131	192.929	32.6805	334.743	-3.3466	5.6984e-33	3.50444e-31	Reps2	X	162411954	162643649	-	8296	protein_coding	RALBP1 associated Eps domain containing protein 2 [Source:MGI Symbol;Acc:MGI:2663511]	-
ENSMUSG00000039062	131.459	183.086	105.802	85.9688	69.6219	176.476	720.887	1097.74	1355.41	1399.39	888.936	1004.68	125.402	1077.84	-3.10001	6.83465e-33	4.19198e-31	Anpep	7	79821803	79861059	-	4135	protein_coding	alanyl (membrane) aminopeptidase [Source:MGI Symbol;Acc:MGI:5000466]	-
ENSMUSG00000102037	192.807	184.092	179.348	93.7842	104.433	145.735	0.85312	4.2914	9.05803	6.99694	14.3957	5.46024	150.033	6.84258	4.45963	8.9457e-33	5.47215e-31	Bcl2a1a	9	88956900	88962419	+	819	protein_coding	B cell leukemia/lymphoma 2 related protein A1a [Source:MGI Symbol;Acc:MGI:102687]	-
ENSMUSG00000055541	7.79017	12.0716	10.3222	7.81535	2.4865	5.69278	73.3683	121.876	130.106	136.052	89.0736	120.125	7.69643	111.767	-3.84658	8.9949e-33	5.4876e-31	Lair1	7	4003402	4063204	-	7475	protein_coding	leukocyte-associated Ig-like receptor 1 [Source:MGI Symbol;Acc:MGI:105492]	-
ENSMUSG00000028028	646.584	685.063	585.784	376.439	497.299	833.423	76.7808	74.6704	74.1111	76.9663	108.868	135.596	604.099	91.1654	2.73062	9.65581e-33	5.87519e-31	Alpk1	3	127670310	127780527	-	6868	protein_coding	alpha-kinase 1 [Source:MGI Symbol;Acc:MGI:1918731]	-
ENSMUSG00000037095	4502.72	5037.88	6086.21	4230.71	4968.02	3091.18	1085.17	1119.2	857.219	862.956	604.621	651.589	4652.79	863.458	2.42975	1.12811e-32	6.84597e-31	Lrg1	17	56119678	56122001	-	1408	protein_coding	leucine-rich alpha-2-glycoprotein 1 [Source:MGI Symbol;Acc:MGI:1924155]	-
ENSMUSG00000039994	925.083	796.725	687.715	577.033	596.759	506.657	149.296	115.01	103.756	115.838	151.155	178.368	681.662	135.57	2.33205	1.16902e-32	7.07548e-31	Timeless	10	128232065	128252941	+	6115	protein_coding	timeless circadian clock 1 [Source:MGI Symbol;Acc:MGI:1321393]	-
ENSMUSG00000048200	49.6624	59.352	32.2568	71.6407	59.6759	39.8494	235.461	223.153	334.324	345.182	305.909	303.953	52.0729	291.33	-2.48474	1.31116e-32	7.91492e-31	Cracr2b	7	141461094	141466613	+	2764	protein_coding	calcium release activated channel regulator 2B [Source:MGI Symbol;Acc:MGI:2446129]	-
ENSMUSG00000005087	5519.34	6468.36	4354.67	3895.95	4195.96	8286.41	552.822	658.301	1115.78	788.322	904.232	919.141	5453.45	823.1	2.72811	1.36012e-32	8.18893e-31	Cd44	2	102811141	102901665	-	6776	protein_coding	CD44 antigen [Source:MGI Symbol;Acc:MGI:88338]	-
ENSMUSG00000032834	1009.8	1019.04	753.519	900.067	821.787	1141.97	325.039	357.045	324.442	303.201	315.806	269.372	941.032	315.817	1.57576	1.54646e-32	9.28646e-31	Pwp2	10	78170909	78185149	-	3872	protein_coding	PWP2 periodic tryptophan protein homolog (yeast) [Source:MGI Symbol;Acc:MGI:1341200]	-
ENSMUSG00000021149	1765.45	1641.74	1896.7	1483.61	1564.01	1910.5	762.689	755.287	648.061	772.773	780.069	717.112	1710.33	739.332	1.21014	2.35572e-32	1.41091e-30	Gtpbp4	13	8966331	8996083	-	9566	protein_coding	GTP binding protein 4 [Source:MGI Symbol;Acc:MGI:1916487]	-
ENSMUSG00000059713	71.0853	50.2983	45.1595	49.4972	53.4597	62.6206	240.58	296.107	351.616	348.292	229.432	218.41	55.3534	280.739	-2.33775	2.42858e-32	1.45076e-30	Rcan3	4	135412308	135433853	-	5111	protein_coding	regulator of calcineurin 3 [Source:MGI Symbol;Acc:MGI:1858220]	-
ENSMUSG00000078921	2098.48	1417.41	1648.97	648.674	721.084	2221.32	132.234	112.435	110.343	69.9694	64.7808	130.136	1459.32	103.316	3.82068	2.82888e-32	1.6855e-30	Tgtp2	11	49057194	49064206	-	2938	protein_coding	T cell specific GTPase 2 [Source:MGI Symbol;Acc:MGI:3710083]	-
ENSMUSG00000042622	2204.62	1687.01	1783.16	1806.65	1383.74	1977.67	240.58	419.699	416.669	392.606	225.833	223.87	1807.14	319.876	2.4976	3.34379e-32	1.98713e-30	Maff	15	79346621	79359076	+	2594	protein_coding	v-maf musculoaponeurotic fibrosarcoma oncogene family, protein F (avian) [Source:MGI Symbol;Acc:MGI:96910]	TF_bZIP
ENSMUSG00000020785	14.6066	18.1074	12.9027	7.81535	12.4325	13.6627	110.053	91.836	183.631	193.582	144.857	127.406	13.2545	141.894	-3.40509	3.66176e-32	2.17047e-30	Camkk1	11	73019008	73042073	+	3728	protein_coding	calcium/calmodulin-dependent protein kinase kinase 1, alpha [Source:MGI Symbol;Acc:MGI:1891766]	-
ENSMUSG00000018169	109.062	108.644	121.286	71.6407	79.5679	68.3133	662.874	803.35	423.257	782.102	437.27	532.374	93.0857	606.871	-2.70307	4.03764e-32	2.3871e-30	Mfng	15	78755882	78773475	-	2839	protein_coding	MFNG O-fucosylpeptide 3-beta-N-acetylglucosaminyltransferase [Source:MGI Symbol;Acc:MGI:1095404]	-
ENSMUSG00000050288	23.3705	22.1313	15.4833	7.81535	13.6757	22.7711	283.236	270.358	671.117	782.88	282.516	211.129	17.5412	416.873	-4.55904	4.1269e-32	2.4336e-30	Fzd2	11	102604396	102608058	+	3663	protein_coding	frizzled class receptor 2 [Source:MGI Symbol;Acc:MGI:1888513]	-
ENSMUSG00000021701	1195.79	1312.79	980.607	1035.53	820.544	1022.42	363.429	267.783	218.216	268.216	315.806	295.763	1061.28	288.202	1.88163	4.44287e-32	2.6132e-30	Plk2	13	110395046	110400844	+	4491	protein_coding	polo like kinase 2 [Source:MGI Symbol;Acc:MGI:1099790]	-
ENSMUSG00000023947	750.778	931.525	652.878	514.51	534.597	812.929	108.346	98.7022	175.396	111.174	90.873	74.6233	699.536	109.852	2.67019	4.86993e-32	2.85707e-30	Nfkbie	17	45555703	45563169	+	3045	protein_coding	nuclear factor of kappa light polypeptide gene enhancer in B cells inhibitor, epsilon [Source:MGI Symbol;Acc:MGI:1194908]	-
ENSMUSG00000031639	1594.06	1915.36	1176.73	541.864	846.652	2052.82	116.877	105.568	147.399	139.161	116.965	141.056	1354.58	127.838	3.40567	5.47525e-32	3.204e-30	Tlr3	8	45395665	45411080	-	5207	protein_coding	toll-like receptor 3 [Source:MGI Symbol;Acc:MGI:2156367]	-
ENSMUSG00000024948	94.4558	105.626	76.1261	110.717	84.5409	76.2832	310.536	313.272	376.32	465.685	385.986	494.152	91.2917	390.992	-2.09726	6.45085e-32	3.76529e-30	Map4k2	19	6341135	6355615	+	6646	protein_coding	mitogen-activated protein kinase kinase kinase kinase 2 [Source:MGI Symbol;Acc:MGI:1346883]	-
ENSMUSG00000026126	19.4754	56.3341	30.9665	45.5895	19.892	28.4639	209.014	268.642	275.858	284.542	223.134	296.673	33.4536	259.644	-2.95523	7.73807e-32	4.50517e-30	Ptpn18	1	34459762	34475733	+	6492	protein_coding	protein tyrosine phosphatase, non-receptor type 18 [Source:MGI Symbol;Acc:MGI:108410]	-
ENSMUSG00000034936	4336.2	4267.31	5204.96	12107.3	6928.62	3219.83	390.729	477.204	596.183	679.481	302.31	374.937	6010.7	470.141	3.67605	8.82317e-32	5.12391e-30	Arl4d	11	101665541	101667832	+	1382	protein_coding	ADP-ribosylation factor-like 4D [Source:MGI Symbol;Acc:MGI:1933155]	-
ENSMUSG00000024360	6004.28	5650.51	6056.54	5655.71	5363.37	7047.66	3085.74	2980.81	2858.22	2958.93	2948.43	2902.12	5963.01	2955.71	1.01258	1.10465e-31	6.39886e-30	Etf1	18	34902785	34932007	-	3709	protein_coding	eukaryotic translation termination factor 1 [Source:MGI Symbol;Acc:MGI:2385071]	-
ENSMUSG00000097418	78.8755	81.4833	87.7385	58.6151	74.5949	104.747	9.38432	1.71656	4.11728	3.10975	2.6992	8.19036	81.0091	4.86958	4.06667	1.20773e-31	6.97834e-30	Mir155hg	16	84703167	84715245	+	1433	lincRNA	Mir155 host gene (non-protein coding) [Source:MGI Symbol;Acc:MGI:5477161]	-
ENSMUSG00000027318	74.9804	75.4475	68.3844	31.2614	57.1894	114.994	418.882	500.377	736.171	842.743	937.522	826.316	70.3762	710.335	-3.33164	1.21642e-31	7.01092e-30	Adam33	2	131050591	131063814	-	5394	protein_coding	a disintegrin and metallopeptidase domain 33 [Source:MGI Symbol;Acc:MGI:1341813]	-
novel.396	68.164	112.668	105.802	110.717	159.136	89.9459	0.85312	6.86624	1.64691	6.99694	3.59893	9.1004	107.739	4.84376	4.47732	1.36001e-31	7.81884e-30	-	5	147555714	147560664	-	1141	-	- && Q9TTC1.1 RecName: Full=Pro-Pol polyprotein; AltName: Full=Pr125Pol; Contains: RecName: Full=Protease/Reverse transcriptase/ribonuclease H; AltName: Full=p87Pro-RT-RNaseH; Contains: RecName: Full=Integrase; Short=IN; AltName: Full=p42In && -	-
ENSMUSG00000001416	5197.99	5102.26	4726.27	5413.43	4353.86	5781.58	2296.6	1884.78	2257.1	1952.92	2359.1	1926.56	5095.9	2112.84	1.27023	1.76714e-31	1.01341e-29	Cct3	3	88297116	88321767	+	6370	protein_coding	chaperonin containing Tcp1, subunit 3 (gamma) [Source:MGI Symbol;Acc:MGI:104708]	-
ENSMUSG00000099137	279.472	184.092	507.077	399.885	299.623	243.651	33.2717	30.0398	35.4086	21.7683	35.9893	50.9622	318.967	34.5733	3.20738	1.95521e-31	1.11734e-29	Gm10603	7	100446737	100474846	-	6938	antisense	predicted gene 10603 [Source:MGI Symbol;Acc:MGI:3642592]	-
ENSMUSG00000010047	164.567	133.794	187.089	158.912	170.325	144.597	424.854	411.975	405.964	411.265	383.286	372.206	159.881	401.592	-1.33245	1.95811e-31	1.11734e-29	Hyal2	9	107567945	107572779	+	3293	protein_coding	hyaluronoglucosaminidase 2 [Source:MGI Symbol;Acc:MGI:1196334]	-
ENSMUSG00000052102	124.643	147.877	178.058	169.333	197.677	151.428	409.498	497.803	507.249	471.127	464.262	499.612	161.502	474.925	-1.56121	1.99905e-31	1.13787e-29	Gnpda1	18	38327558	38339003	-	2392	protein_coding	glucosamine-6-phosphate deaminase 1 [Source:MGI Symbol;Acc:MGI:1347054]	-
ENSMUSG00000038507	4562.12	5619.33	3611.47	2482.68	2824.66	6324.68	546.85	605.088	731.23	762.666	509.249	544.204	4237.49	616.548	2.78087	2.34038e-31	1.32886e-29	Parp12	6	39086410	39118349	-	3995	protein_coding	poly (ADP-ribose) polymerase family, member 12 [Source:MGI Symbol;Acc:MGI:2143990]	-
ENSMUSG00000060591	7574	7542.74	7539.06	6876.2	6129.22	10273.2	1682.35	1986.92	2573.3	2515.01	2063.09	2218.68	7655.73	2173.23	1.81668	2.49222e-31	1.41158e-29	Ifitm2	7	140954837	140955987	-	655	protein_coding	interferon induced transmembrane protein 2 [Source:MGI Symbol;Acc:MGI:1933382]	-
ENSMUSG00000007029	2343.87	2017.97	1860.57	1853.54	1907.14	2433.09	812.17	805.067	867.1	936.035	729.684	768.984	2069.36	819.84	1.33582	2.87452e-31	1.62011e-29	Vars	17	35000987	35016322	+	5608	protein_coding	valyl-tRNA synthetase [Source:MGI Symbol;Acc:MGI:90675]	-
ENSMUSG00000033554	367.112	450.673	398.694	384.255	390.38	499.826	145.03	127.025	146.575	136.829	165.551	162.897	415.157	147.318	1.49621	3.03929e-31	1.70878e-29	Dph5	3	115887837	115934361	+	8027	protein_coding	diphthamide biosynthesis 5 [Source:MGI Symbol;Acc:MGI:1916990]	-
ENSMUSG00000019718	43.8197	59.352	37.4179	53.4049	52.2164	59.2049	284.089	304.689	415.846	426.813	212.337	242.981	50.9026	314.459	-2.62629	3.19648e-31	1.79277e-29	L3hypdh	12	72073428	72085439	-	2679	protein_coding	L-3-hydroxyproline dehydratase (trans-) [Source:MGI Symbol;Acc:MGI:1914467]	-
ENSMUSG00000012428	52263.3	44109.6	23939.7	15243.8	18556.7	40160.3	2340.11	2470.13	3464.28	3901.96	1961.42	2579.05	32378.9	2786.16	3.53869	3.56588e-31	1.99507e-29	Steap4	5	7960457	7982213	+	3155	protein_coding	STEAP family member 4 [Source:MGI Symbol;Acc:MGI:1923560]	-
ENSMUSG00000031681	1396.39	1418.41	1539.29	1565.67	1526.71	1155.63	385.61	463.471	491.604	469.572	517.347	611.547	1433.69	489.859	1.5494	3.67675e-31	2.05209e-29	Smad1	8	79338395	79399518	-	6262	protein_coding	SMAD family member 1 [Source:MGI Symbol;Acc:MGI:109452]	MH1
ENSMUSG00000044562	1222.08	989.871	1443.81	1606.05	1325.3	727.537	286.648	224.869	200.923	171.036	260.023	243.891	1219.11	231.232	2.39858	3.86664e-31	2.15284e-29	Rasip1	7	45627488	45639093	+	3202	protein_coding	Ras interacting protein 1 [Source:MGI Symbol;Acc:MGI:1917153]	-
ENSMUSG00000074695	168.462	189.122	189.67	96.3893	156.649	241.374	0	0	0	0	0	0	173.611	0	10.1137	4.25796e-31	2.36497e-29	Il22	10	118204942	118210047	+	1110	protein_coding	interleukin 22 [Source:MGI Symbol;Acc:MGI:1355307]	-
ENSMUSG00000053080	259.997	196.163	138.059	192.779	160.379	190.139	790.842	733.83	862.159	1193.37	707.19	801.745	189.586	848.189	-2.15888	5.2908e-31	2.93154e-29	2700081O15Rik	19	7417625	7425904	+	7032	protein_coding	RIKEN cDNA 2700081O15 gene [Source:MGI Symbol;Acc:MGI:1919667]	zf-BED
ENSMUSG00000071645	599.843	596.538	449.015	608.294	578.111	576.109	234.608	227.444	231.391	235.564	259.123	238.431	567.985	237.76	1.25756	5.33378e-31	2.94823e-29	Tut1	19	8953850	8966207	+	2747	protein_coding	terminal uridylyl transferase 1, U6 snRNA-specific [Source:MGI Symbol;Acc:MGI:1917294]	-
ENSMUSG00000092021	549.207	574.407	719.972	281.352	512.218	1037.22	7.67808	31.7564	41.1728	15.5488	13.496	44.592	612.397	25.7073	4.57559	6.40018e-31	3.52917e-29	Gbp11	5	105323042	105346472	-	2692	polymorphic_pseudogene	guanylate binding protein 11 [Source:MGI Symbol;Acc:MGI:3646307]	-
ENSMUSG00000059824	508.309	649.854	1008.99	540.561	1164.92	672.886	4077.91	5092.18	5654.68	5485.6	3772.58	3948.66	757.588	4671.94	-2.62512	6.48721e-31	3.56859e-29	Dbp	7	45705088	45710203	+	2993	protein_coding	D site albumin promoter binding protein [Source:MGI Symbol;Acc:MGI:94866]	TF_bZIP
ENSMUSG00000002699	965.981	1012	682.554	583.546	538.327	921.091	123.702	135.608	205.041	139.161	157.453	129.226	783.917	148.365	2.40213	7.67962e-31	4.21442e-29	Lcp2	11	34046920	34092295	+	4459	protein_coding	lymphocyte cytosolic protein 2 [Source:MGI Symbol;Acc:MGI:1321402]	-
ENSMUSG00000026656	4555.3	5430.21	3292.77	3104	2970.12	5450.26	559.647	753.57	832.515	1017.67	657.705	785.365	4133.78	767.745	2.42875	9.02873e-31	4.94296e-29	Fcgr2b	1	170958617	170976547	-	5790	protein_coding	Fc receptor, IgG, low affinity IIb [Source:MGI Symbol;Acc:MGI:95499]	-
ENSMUSG00000019890	122.695	187.11	73.5455	98.9944	88.2706	145.735	8.5312	7.72452	8.23457	3.10975	7.19786	0.91004	119.392	5.95132	4.32781	1.0238e-30	5.59167e-29	Nts	10	102481756	102490486	-	1248	protein_coding	neurotensin [Source:MGI Symbol;Acc:MGI:1328351]	-
ENSMUSG00000025364	2320.5	2152.77	2078.63	2048.92	2247.79	2554.92	1001.56	1061.69	1109.2	1178.6	1111.17	994.674	2233.92	1076.15	1.05372	1.11958e-30	6.10025e-29	Pa2g4	10	128557766	128565987	-	2804	protein_coding	proliferation-associated 2G4 [Source:MGI Symbol;Acc:MGI:894684]	-
ENSMUSG00000024401	99.3247	78.4654	78.7066	79.456	82.0544	75.1447	2.55936	0.85828	7.41111	2.33231	11.6965	4.5502	82.192	4.9013	4.08425	1.41221e-30	7.67646e-29	Tnf	17	35199381	35202007	-	1639	protein_coding	tumor necrosis factor [Source:MGI Symbol;Acc:MGI:104798]	-
ENSMUSG00000045427	2912.55	2953.52	2788.28	2807.01	2641.9	3333.69	1415.33	1271.97	1329.88	1357.41	1542.14	1488.83	2906.16	1400.93	1.05306	1.42049e-30	7.70291e-29	Hnrnph2	X	134601179	134607060	+	4369	protein_coding	heterogeneous nuclear ribonucleoprotein H2 [Source:MGI Symbol;Acc:MGI:1201779]	-
ENSMUSG00000035606	744.935	759.505	774.163	523.628	672.597	396.217	4259.63	4359.21	2485.19	2708.59	3358.7	3217.9	645.174	3398.2	-2.39672	1.42379e-30	7.70291e-29	Ky	9	102505750	102546239	+	5879	protein_coding	kyphoscoliosis peptidase [Source:MGI Symbol;Acc:MGI:96709]	-
ENSMUSG00000003808	1113.02	1101.53	1059.31	1044.65	1225.84	1094.15	568.178	537.283	559.127	477.347	581.228	575.145	1106.42	549.718	1.00979	1.47992e-30	7.98773e-29	Farsa	8	84856989	84869257	+	4538	protein_coding	phenylalanyl-tRNA synthetase, alpha subunit [Source:MGI Symbol;Acc:MGI:1913840]	-
ENSMUSG00000020377	38.9509	44.2625	50.3206	53.4049	36.0542	44.4037	200.483	236.027	307.149	177.256	173.648	231.15	44.5661	220.952	-2.31397	1.54202e-30	8.30337e-29	Ltc4s	11	50236461	50238616	-	1014	protein_coding	leukotriene C4 synthase [Source:MGI Symbol;Acc:MGI:107498]	-
ENSMUSG00000028069	854.971	824.893	821.903	730.735	762.111	1220.53	258.495	284.949	242.92	241.783	287.915	287.573	869.191	267.272	1.7022	1.72042e-30	9.24233e-29	Gpatch4	3	88043108	88055993	+	2447	protein_coding	G patch domain containing 4 [Source:MGI Symbol;Acc:MGI:1913864]	-
ENSMUSG00000020549	899.765	800.749	922.545	850.57	901.355	1012.18	419.735	419.699	406.788	471.127	395.883	388.587	897.86	416.97	1.10569	1.86754e-30	1.00093e-28	Elac2	11	64979038	65002069	+	3479	protein_coding	elaC ribonuclease Z 2 [Source:MGI Symbol;Acc:MGI:1890496]	-
ENSMUSG00000005686	2205.59	2653.74	1477.36	1612.57	1644.82	1935.54	325.892	329.58	482.546	530.213	306.809	325.794	1921.6	383.472	2.32486	2.13209e-30	1.14005e-28	Ampd3	7	110768206	110812405	+	5627	protein_coding	adenosine monophosphate deaminase 3 [Source:MGI Symbol;Acc:MGI:1096344]	-
ENSMUSG00000060519	4654.63	6028.76	3411.48	2030.69	2840.82	5999.05	431.679	453.172	583.008	667.042	398.582	407.698	4160.9	490.197	3.08535	2.36105e-30	1.25954e-28	Tor3a	1	156653617	156674356	-	3892	protein_coding	torsin family 3, member A [Source:MGI Symbol;Acc:MGI:1353652]	-
ENSMUSG00000022951	14110.9	11032.4	14483.3	17441.2	12533.2	7419.97	2465.52	1748.32	2364.14	1722.8	2413.98	3105.06	12836.8	2303.3	2.47855	2.63375e-30	1.40176e-28	Rcan1	16	92391953	92470867	-	3085	protein_coding	regulator of calcineurin 1 [Source:MGI Symbol;Acc:MGI:1890564]	-
ENSMUSG00000042286	390.482	439.607	196.121	419.424	227.514	264.145	1384.61	1705.4	1927.71	1910.94	1839.95	2094.91	322.882	1810.59	-2.48605	3.05295e-30	1.6211e-28	Stab1	14	31139013	31168641	-	10288	protein_coding	stabilin 1 [Source:MGI Symbol;Acc:MGI:2178742]	-
ENSMUSG00000028010	692.352	734.356	690.296	870.109	648.976	972.326	226.93	231.736	256.919	265.884	273.519	292.123	768.069	257.852	1.5748	3.14057e-30	1.66377e-28	Gar1	3	129824912	129831396	-	1714	protein_coding	GAR1 ribonucleoprotein [Source:MGI Symbol;Acc:MGI:1930948]	-
ENSMUSG00000020605	63.2952	80.4773	92.8996	83.3637	79.5679	72.8675	215.839	240.318	316.207	303.201	287.915	275.742	78.7452	273.204	-1.80004	3.20024e-30	1.69148e-28	Hs1bp3	12	8313432	8343824	+	3004	protein_coding	HCLS1 binding protein 3 [Source:MGI Symbol;Acc:MGI:1913224]	-
ENSMUSG00000063406	3801.6	3719.06	3314.71	3154.8	2711.53	3877.92	1158.54	1316.6	1012.85	1182.48	1430.58	1290.44	3429.94	1231.91	1.47763	3.4219e-30	1.80448e-28	Tmed5	5	108106366	108132620	-	7688	protein_coding	transmembrane p24 trafficking protein 5 [Source:MGI Symbol;Acc:MGI:1921586]	-
ENSMUSG00000040473	179.174	143.853	216.766	239.671	203.893	217.464	11.0906	12.0159	37.0556	27.9878	21.5936	12.7406	200.137	20.414	3.28588	3.97746e-30	2.09263e-28	Cfap69	5	5579278	5664239	-	7905	protein_coding	cilia and flagella associated protein 69 [Source:MGI Symbol;Acc:MGI:2443778]	-
ENSMUSG00000017309	67.1902	126.752	85.158	72.9432	74.5949	42.1266	797.667	660.018	364.791	509.999	649.607	815.396	78.1274	632.913	-3.01614	4.77271e-30	2.50529e-28	Cd300lg	11	102041509	102055620	+	2737	protein_coding	CD300 molecule like family member G [Source:MGI Symbol;Acc:MGI:1289168]	-
ENSMUSG00000045608	66.2165	86.5131	65.8039	63.8253	64.6489	92.223	3.41248	4.2914	8.23457	0.777438	1.79947	0.91004	73.2051	3.23757	4.49178	5.00514e-30	2.6213e-28	Dbx2	15	95623563	95655960	-	3469	protein_coding	developing brain homeobox 2 [Source:MGI Symbol;Acc:MGI:107445]	Homeobox
ENSMUSG00000019467	178.2	180.068	170.316	242.276	227.514	169.645	601.45	547.583	764.992	798.429	834.053	909.13	194.67	742.606	-1.93324	5.3764e-30	2.80932e-28	Arhgef25	10	127182525	127190083	-	3994	protein_coding	Rho guanine nucleotide exchange factor (GEF) 25 [Source:MGI Symbol;Acc:MGI:1277173]	-
ENSMUSG00000032939	1024.41	1139.76	890.288	866.201	837.95	1131.72	389.023	304.689	370.556	356.844	349.096	401.328	981.722	361.923	1.44059	5.47277e-30	2.85318e-28	Nup93	8	94214564	94317227	+	4257	protein_coding	nucleoporin 93 [Source:MGI Symbol;Acc:MGI:1919055]	-
ENSMUSG00000039081	496.624	615.651	536.753	467.618	555.732	439.482	1225.08	1508.86	1888.19	1708.03	2019	1637.16	518.643	1664.39	-1.68186	5.9948e-30	3.11825e-28	Zfp503	14	21983959	21989601	-	4216	protein_coding	zinc finger protein 503 [Source:MGI Symbol;Acc:MGI:1353644]	-
ENSMUSG00000031304	524.863	463.751	383.211	263.117	322.001	298.302	43.5091	59.2213	79.8753	48.2011	49.4853	80.0835	375.874	60.0626	2.64786	6.25344e-30	3.24542e-28	Il2rg	X	101264378	101268255	-	2387	protein_coding	interleukin 2 receptor, gamma chain [Source:MGI Symbol;Acc:MGI:96551]	-
ENSMUSG00000025225	2788.88	2824.75	1873.48	1672.48	1744.28	2994.4	412.057	337.304	577.243	513.109	325.703	358.556	2316.38	420.662	2.46099	6.28089e-30	3.25231e-28	Nfkb2	19	46304737	46312090	+	3289	protein_coding	nuclear factor of kappa light polypeptide gene enhancer in B cells 2, p49/p100 [Source:MGI Symbol;Acc:MGI:1099800]	RHD
ENSMUSG00000028101	117.826	138.823	109.673	136.769	138.001	112.717	342.954	321.855	478.428	410.487	390.484	384.037	125.635	388.041	-1.62737	6.97631e-30	3.60427e-28	Pias3	3	96696384	96706070	+	3918	protein_coding	protein inhibitor of activated STAT 3 [Source:MGI Symbol;Acc:MGI:1913126]	zf-MIZ
ENSMUSG00000030844	120.748	156.931	94.1899	83.3637	68.3787	159.398	528.081	578.481	867.924	813.977	662.204	806.296	113.835	709.494	-2.63551	7.01122e-30	3.61417e-28	Rgs10	7	128373621	128418758	-	1711	protein_coding	regulator of G-protein signalling 10 [Source:MGI Symbol;Acc:MGI:1915115]	-
ENSMUSG00000040631	51.6099	45.2685	21.9346	22.1435	34.811	47.8193	238.874	199.979	183.631	199.802	259.123	249.351	37.2645	221.793	-2.5561	7.13848e-30	3.67152e-28	Dok4	8	94863828	94876330	-	3054	protein_coding	docking protein 4 [Source:MGI Symbol;Acc:MGI:2148865]	-
ENSMUSG00000038793	51.6099	35.2088	36.1276	41.6819	34.811	54.6507	156.974	214.57	256.095	266.661	176.348	242.071	42.3483	218.786	-2.36535	8.55851e-30	4.39203e-28	Lefty1	1	180935022	180938400	+	1758	protein_coding	left right determination factor 1 [Source:MGI Symbol;Acc:MGI:107405]	-
ENSMUSG00000073409	3520.18	5258.19	3934.04	1404.16	2168.23	3737.88	292.62	233.452	273.388	108.841	158.353	377.667	3337.11	240.72	3.79358	1.06186e-29	5.43706e-28	H2-Q6	17	35424850	35430055	+	2085	protein_coding	histocompatibility 2, Q region locus 6 [Source:MGI Symbol;Acc:MGI:95935]	-
ENSMUSG00000037405	11111.7	9521.47	5731.39	3083.15	4490.61	14487	232.049	181.097	541.011	560.533	166.451	177.458	8070.89	309.766	4.7031	1.14411e-29	5.84518e-28	Icam1	9	21015985	21028817	+	4360	protein_coding	intercellular adhesion molecule 1 [Source:MGI Symbol;Acc:MGI:96392]	-
ENSMUSG00000027737	185.017	232.378	65.8039	126.348	115.622	113.856	9.38432	3.43312	5.7642	3.10975	0.899733	0.91004	139.837	3.91686	5.14878	1.15906e-29	5.9084e-28	Slc7a11	3	49892526	50443614	-	13922	protein_coding	solute carrier family 7 (cationic amino acid transporter, y+ system), member 11 [Source:MGI Symbol;Acc:MGI:1347355]	-
ENSMUSG00000041378	2423.72	1960.63	2580.54	4375.29	2347.25	1424.33	409.498	228.303	192.689	187.363	344.598	323.974	2518.63	281.071	3.1639	1.30746e-29	6.65008e-28	Cldn5	16	18776847	18778262	+	1416	protein_coding	claudin 5 [Source:MGI Symbol;Acc:MGI:1276112]	-
ENSMUSG00000020806	928.978	779.624	895.449	943.052	1044.33	976.881	388.17	370.777	256.095	305.533	356.294	322.154	928.052	333.171	1.47804	1.33495e-29	6.77485e-28	Rhbdf2	11	116598165	116627019	-	5293	protein_coding	rhomboid 5 homolog 2 [Source:MGI Symbol;Acc:MGI:2442473]	-
ENSMUSG00000028967	9199.22	9670.36	7447.45	11174.6	8590.85	7225.27	1463.95	2051.29	902.509	1481.02	657.705	1082.04	8884.63	1273.09	2.80292	1.53363e-29	7.76599e-28	Errfi1	4	150853919	150868892	+	3582	protein_coding	ERBB receptor feedback inhibitor 1 [Source:MGI Symbol;Acc:MGI:1921405]	-
ENSMUSG00000028931	21.423	21.1253	14.193	26.0512	8.70274	27.3253	124.556	218.003	312.09	291.539	155.654	213.859	19.8034	219.284	-3.46411	1.58916e-29	8.02945e-28	Kcnab2	4	152390742	152477871	-	5578	protein_coding	potassium voltage-gated channel, shaker-related subfamily, beta member 2 [Source:MGI Symbol;Acc:MGI:109239]	-
ENSMUSG00000041872	369.059	312.856	378.05	209.712	330.704	337.012	1.70624	0.85828	0	0	0	0	322.899	0.42742	9.56605	1.64955e-29	8.31626e-28	Il17f	1	20777146	20790617	-	2022	protein_coding	interleukin 17F [Source:MGI Symbol;Acc:MGI:2676631]	-
ENSMUSG00000034158	3968.12	3710	3126.33	4427.39	4341.42	2927.23	1316.36	1344.07	1228.6	1524.56	1310.91	1198.52	3750.08	1320.5	1.5057	2.05892e-29	1.03347e-27	Lrrc58	16	37868389	37888858	+	8604	protein_coding	leucine rich repeat containing 58 [Source:MGI Symbol;Acc:MGI:2443542]	-
ENSMUSG00000061740	175.279	158.943	147.091	179.753	172.812	183.307	438.504	556.166	541.011	664.709	421.975	534.194	169.531	526.093	-1.63402	2.1552e-29	1.07943e-27	Cyp2d22	15	82370527	82380260	-	3909	protein_coding	cytochrome P450, family 2, subfamily d, polypeptide 22 [Source:MGI Symbol;Acc:MGI:1929474]	-
ENSMUSG00000020464	1707.02	1641.74	1291.56	967.8	1141.3	1921.88	331.011	370.777	275.858	306.31	386.885	363.106	1445.22	338.991	2.09278	2.16292e-29	1.08094e-27	Pnpt1	11	29130744	29161828	+	3516	protein_coding	polyribonucleotide nucleotidyltransferase 1 [Source:MGI Symbol;Acc:MGI:1918951]	-
ENSMUSG00000031948	3660.41	3420.29	3832.11	3113.11	3595.47	4089.69	1772.78	1859.89	1869.25	1811.43	1663.61	1858.3	3618.51	1805.88	1.00271	2.42891e-29	1.21123e-27	Kars	8	111993443	112011323	-	4464	protein_coding	lysyl-tRNA synthetase [Source:MGI Symbol;Acc:MGI:1934754]	-
ENSMUSG00000042677	3727.6	3746.22	1847.67	1263.48	1555.3	4573.58	140.765	198.263	259.389	294.649	118.765	163.807	2785.64	195.94	3.82913	2.68311e-29	1.33509e-27	Zc3h12a	4	125118423	125127840	-	2882	protein_coding	zinc finger CCCH type containing 12A [Source:MGI Symbol;Acc:MGI:2385891]	-
ENSMUSG00000021595	2693.45	2702.03	2085.08	2326.37	2053.85	3288.15	865.064	943.25	935.447	876.172	845.749	819.946	2524.82	880.938	1.51929	2.91228e-29	1.44599e-27	Nsun2	13	69533746	69635780	+	5737	protein_coding	NOL1/NOP2/Sun domain family member 2 [Source:MGI Symbol;Acc:MGI:107252]	-
ENSMUSG00000016524	220.072	305.814	171.606	135.466	130.541	275.53	0	0	0.823457	0	0	0	206.505	0.137243	9.88391	3.70126e-29	1.83376e-27	Il19	1	130932656	130940115	-	1149	protein_coding	interleukin 19 [Source:MGI Symbol;Acc:MGI:1890472]	-
ENSMUSG00000039713	166.515	123.734	104.512	78.1535	105.676	110.44	467.51	496.086	812.752	890.944	622.615	588.796	114.838	646.45	-2.48878	4.26814e-29	2.11006e-27	Plekhg5	4	152072498	152115400	+	4945	protein_coding	pleckstrin homology domain containing, family G (with RhoGef domain) member 5 [Source:MGI Symbol;Acc:MGI:2652860]	-
ENSMUSG00000027962	5763.75	4511.76	2866.98	1366.38	2190.6	10178.7	263.614	245.468	208.335	178.033	229.432	273.012	4479.7	232.982	4.26532	4.54617e-29	2.24268e-27	Vcam1	3	116109949	116129688	-	8870	protein_coding	vascular cell adhesion molecule 1 [Source:MGI Symbol;Acc:MGI:98926]	-
ENSMUSG00000057561	3435.47	3513.84	2833.44	2327.67	2485.25	4209.24	655.196	764.728	956.034	929.816	748.578	664.329	3134.15	786.447	1.99463	5.07223e-29	2.49682e-27	Eif1a	18	46597704	46610225	+	2879	protein_coding	eukaryotic translation initiation factor 1A [Source:MGI Symbol;Acc:MGI:95298]	-
ENSMUSG00000001750	1486.95	2341.89	2170.24	1514.87	1923.31	2426.26	437.651	427.424	415.022	384.832	598.323	602.447	1977.25	477.616	2.05006	5.86992e-29	2.8833e-27	Tcirg1	19	3896050	3907133	-	4470	protein_coding	T cell, immune regulator 1, ATPase, H+ transporting, lysosomal V0 protein A3 [Source:MGI Symbol;Acc:MGI:1350931]	-
ENSMUSG00000042485	6968.31	5893.96	10071.9	10123.5	8726.36	6870.04	2621.64	1949.15	1862.66	2419.39	2306.92	1999.36	8109	2193.19	1.88637	6.14451e-29	3.01173e-27	Mustn1	14	30879200	30881610	+	1236	protein_coding	musculoskeletal, embryonic nuclear protein 1 [Source:MGI Symbol;Acc:MGI:1913425]	-
ENSMUSG00000001864	31.1607	55.3282	45.1595	42.9844	31.0812	51.235	244.845	271.217	181.984	282.21	172.749	202.029	42.8248	225.839	-2.39844	6.59637e-29	3.22631e-27	Aif1l	2	31950139	31973442	+	4032	protein_coding	allograft inflammatory factor 1-like [Source:MGI Symbol;Acc:MGI:1919598]	-
ENSMUSG00000032369	2375.03	3111.45	2001.21	1566.98	1595.09	3009.2	163.799	195.688	315.384	360.731	119.665	119.215	2276.49	212.414	3.42106	7.11851e-29	3.47429e-27	Plscr1	9	92249750	92272278	+	2462	protein_coding	phospholipid scramblase 1 [Source:MGI Symbol;Acc:MGI:893575]	-
ENSMUSG00000026628	2521.09	2369.05	2317.33	2951.6	1406.11	1991.33	410.351	293.532	467.724	405.045	353.595	173.818	2259.42	350.677	2.68734	7.20449e-29	3.50879e-27	Atf3	1	191170296	191218039	-	2154	protein_coding	activating transcription factor 3 [Source:MGI Symbol;Acc:MGI:109384]	TF_bZIP
ENSMUSG00000097715	38.9509	55.3282	30.9665	23.446	21.1352	30.741	161.24	182.814	175.396	199.024	168.25	173.818	33.428	176.757	-2.38402	7.33968e-29	3.56706e-27	Gpr137b-ps	13	12615057	12650388	-	4716	transcribed_unprocessed_pseudogene	G protein-coupled receptor 137B, pseudogene [Source:MGI Symbol;Acc:MGI:3710533]	-
ENSMUSG00000017677	1348.67	1314.8	1268.34	1496.64	1312.87	1573.48	600.597	503.811	566.538	541.097	682.897	642.488	1385.8	589.571	1.23335	7.94987e-29	3.84887e-27	Wsb1	11	79239372	79254671	-	3987	protein_coding	WD repeat and SOCS box-containing 1 [Source:MGI Symbol;Acc:MGI:1926139]	-
ENSMUSG00000003283	926.057	1169.94	762.551	461.105	564.435	1022.42	62.2778	89.2611	124.342	151.6	80.976	82.8137	817.752	98.5452	3.0519	7.95312e-29	3.84887e-27	Hck	2	153108468	153151441	+	2092	protein_coding	hemopoietic cell kinase [Source:MGI Symbol;Acc:MGI:96052]	-
ENSMUSG00000063193	2.92131	3.0179	2.58054	2.60512	1.24325	6.83133	69.9559	106.427	96.3445	70.7468	64.7808	72.8032	3.19991	80.1763	-4.63175	8.16105e-29	3.94118e-27	Cd300lb	11	114922781	114934386	-	2917	protein_coding	CD300 molecule like family member B [Source:MGI Symbol;Acc:MGI:2685099]	-
ENSMUSG00000097804	534.601	509.019	230.959	125.046	138.001	513.489	0	6.86624	7.41111	10.1067	0.899733	3.64016	341.852	4.82066	6.13463	8.53064e-29	4.11101e-27	Gm16685	3	7612705	7690001	+	1592	antisense	predicted gene, 16685 [Source:MGI Symbol;Acc:MGI:4439609]	-
ENSMUSG00000045761	846.208	717.254	931.576	1092.85	1256.92	551.061	106.64	90.1194	46.1136	57.5304	146.656	127.406	899.312	95.7443	3.23308	8.68043e-29	4.17443e-27	Togaram2	17	71673261	71729669	+	5624	protein_coding	TOG array regulator of axonemal microtubules 2 [Source:MGI Symbol;Acc:MGI:2443498]	-
ENSMUSG00000020205	568.683	579.437	848.999	840.15	642.759	885.796	205.602	193.113	191.042	147.713	210.538	231.15	727.637	196.526	1.8886	8.71293e-29	4.1813e-27	Phlda1	10	111506286	111508645	+	2205	protein_coding	pleckstrin homology like domain, family A, member 1 [Source:MGI Symbol;Acc:MGI:1096880]	-
ENSMUSG00000050014	825.758	562.335	682.554	507.998	555.732	802.682	127.115	80.6783	49.4074	34.2073	82.7754	94.6442	656.176	78.1379	3.07209	8.86378e-29	4.24481e-27	Apol10b	15	77583819	77596125	-	2325	protein_coding	apolipoprotein L 10B [Source:MGI Symbol;Acc:MGI:3043522]	-
ENSMUSG00000104728	61.3476	89.531	60.6428	71.6407	74.5949	93.3615	0.85312	0	0.823457	1.55488	2.6992	1.82008	75.1864	1.29179	5.87969	1.22583e-28	5.8582e-27	Gm42462	5	43752909	43754271	-	1363	TEC	predicted gene 42462 [Source:MGI Symbol;Acc:MGI:5662599]	-
novel.25	9.73772	19.1134	14.193	7.81535	6.21624	12.5241	90.4307	113.293	83.1692	109.619	100.77	151.977	11.6	108.21	-3.20498	1.22957e-28	5.86387e-27	-	1	151240189	151250605	-	2878	-	- && P11369.2 RecName: Full=LINE-1 retrotransposable element ORF2 protein; Short=ORF2p; AltName: Full=Long interspersed element-1; Short=L1; AltName: Full=Retrovirus-related Pol polyprotein LINE-1; Includes: RecName: Full=Reverse transcriptase; Includes:	-
ENSMUSG00000070524	225.915	120.716	178.058	53.4049	124.325	233.404	7.67808	3.43312	1.64691	6.2195	0	2.73012	155.97	3.61796	5.41667	1.27536e-28	6.06959e-27	Fcrlb	1	170907273	170912941	-	1284	protein_coding	Fc receptor-like B [Source:MGI Symbol;Acc:MGI:3576487]	-
ENSMUSG00000052776	3783.1	4328.67	1949.6	924.816	1570.22	4559.91	85.312	121.018	259.389	176.478	89.0736	118.305	2852.72	141.596	4.33207	1.38013e-28	6.55463e-27	Oas1a	5	120896256	120907521	-	1885	protein_coding	2'-5' oligoadenylate synthetase 1A [Source:MGI Symbol;Acc:MGI:2180860]	-
ENSMUSG00000035352	778.043	1234.32	854.16	522.326	432.65	1164.74	34.9779	39.4809	61.7593	58.3078	27.8917	113.755	831.04	56.0288	3.89159	1.41359e-28	6.69968e-27	Ccl12	11	82101845	82103400	+	537	protein_coding	chemokine (C-C motif) ligand 12 [Source:MGI Symbol;Acc:MGI:108224]	-
ENSMUSG00000035621	3568.87	4440.34	3424.38	4242.43	4240.72	1917.33	827.527	810.217	881.922	857.514	719.786	600.627	3639.01	782.932	2.21643	1.98596e-28	9.39296e-27	Midn	10	80148272	80158368	+	4307	protein_coding	midnolin [Source:MGI Symbol;Acc:MGI:1890222]	-
ENSMUSG00000019082	2301.02	2301.65	3457.93	3908.98	3236.18	2615.26	707.237	799.059	568.185	511.554	811.559	824.496	2970.17	703.682	2.0776	2.0945e-28	9.88597e-27	Slc25a22	7	141429744	141437892	-	5992	protein_coding	solute carrier family 25 (mitochondrial carrier, glutamate), member 22 [Source:MGI Symbol;Acc:MGI:1915517]	-
ENSMUSG00000033508	65.2427	106.632	103.222	110.717	50.9732	68.3133	1.70624	3.43312	6.58766	5.44206	0.899733	6.37028	84.1835	4.07318	4.35905	2.35872e-28	1.11102e-26	Asprv1	6	86628164	86629710	+	1547	protein_coding	aspartic peptidase, retroviral-like 1 [Source:MGI Symbol;Acc:MGI:1915105]	-
ENSMUSG00000074793	92.5083	63.3759	45.1595	46.8921	24.865	26.1868	566.472	428.282	337.617	471.127	556.035	695.271	49.8313	509.134	-3.34415	2.36668e-28	1.11248e-26	Hspa12b	2	131127280	131146321	+	3685	protein_coding	heat shock protein 12B [Source:MGI Symbol;Acc:MGI:1919880]	-
ENSMUSG00000017715	1903.72	1941.52	1541.88	1458.86	1427.25	2074.45	530.641	644.568	617.593	640.609	621.716	689.81	1724.61	624.156	1.46687	2.58465e-28	1.21246e-26	Pgs1	11	117986292	118024011	+	5333	protein_coding	phosphatidylglycerophosphate synthase 1 [Source:MGI Symbol;Acc:MGI:1921701]	-
ENSMUSG00000045930	65.2427	61.364	38.7082	67.733	32.3245	29.6024	397.554	345.029	291.504	328.079	223.134	281.202	49.1625	311.084	-2.65686	2.60527e-28	1.21964e-26	Clec14a	12	58264720	58269290	-	4571	protein_coding	C-type lectin domain family 14, member a [Source:MGI Symbol;Acc:MGI:1914114]	-
ENSMUSG00000029777	3143.33	3028.97	2676.02	2756.21	2454.17	3575.06	1298.45	1229.06	1315.88	1306.1	1333.4	1225.82	2938.96	1284.79	1.19402	2.89922e-28	1.35448e-26	Gars	6	55038007	55079500	+	3119	protein_coding	glycyl-tRNA synthetase [Source:MGI Symbol;Acc:MGI:2449057]	-
ENSMUSG00000055491	1511.29	1321.84	1096.73	1032.93	1169.9	1370.82	451.301	442.014	471.841	477.347	439.07	332.165	1250.59	435.623	1.52169	2.99552e-28	1.39663e-26	Pprc1	19	46044886	46072915	+	7516	protein_coding	peroxisome proliferative activated receptor, gamma, coactivator-related 1 [Source:MGI Symbol;Acc:MGI:2385096]	-
ENSMUSG00000040867	195.728	219.301	207.734	289.168	210.109	339.29	16.2093	14.5908	49.4074	22.5457	33.2901	30.0313	243.555	27.6791	3.13717	3.12474e-28	1.45392e-26	Begain	12	109032187	109068217	-	4408	protein_coding	brain-enriched guanylate kinase-associated [Source:MGI Symbol;Acc:MGI:3044626]	-
ENSMUSG00000013483	236.626	177.05	251.603	132.861	237.46	160.536	11.9437	32.6146	18.1161	37.317	17.0949	20.0209	199.356	22.8512	3.12042	3.28333e-28	1.52462e-26	Card14	11	119307768	119345375	+	4605	protein_coding	caspase recruitment domain family, member 14 [Source:MGI Symbol;Acc:MGI:2386258]	-
ENSMUSG00000026068	233.705	300.784	181.928	397.28	252.379	259.591	0.85312	4.2914	20.5864	8.55182	5.3984	20.0209	270.945	9.95034	4.7679	3.76727e-28	1.74581e-26	Il18rap	1	40515362	40551705	+	6752	protein_coding	interleukin 18 receptor accessory protein [Source:MGI Symbol;Acc:MGI:1338888]	-
ENSMUSG00000105096	840.365	670.98	436.112	123.743	197.677	465.669	17.0624	33.4729	15.6457	17.1036	15.2955	11.8305	455.758	18.4018	4.63057	3.93052e-28	1.81413e-26	Gbp10	5	105215699	105239533	-	3873	protein_coding	guanylate-binding protein 10 [Source:MGI Symbol;Acc:MGI:4359647]	-
ENSMUSG00000040253	4616.65	4646.56	3123.75	1690.72	2262.71	4304.88	499.928	579.339	538.541	549.649	437.27	598.806	3440.88	533.922	2.68825	4.1042e-28	1.89049e-26	Gbp7	3	142530342	142550149	+	5614	protein_coding	guanylate binding protein 7 [Source:MGI Symbol;Acc:MGI:2444421]	-
ENSMUSG00000035828	3912.61	3005.83	3465.67	3843.85	3634.02	3249.44	1204.61	1560.35	974.15	1194.14	953.717	1242.2	3518.57	1188.2	1.56618	4.34108e-28	1.99559e-26	Pim3	15	88862186	88865726	+	2427	protein_coding	proviral integration site 3 [Source:MGI Symbol;Acc:MGI:1355297]	-
ENSMUSG00000029086	528.758	512.037	501.916	359.506	396.596	251.621	78.4871	64.371	27.1741	38.8719	26.992	48.2321	425.072	47.3547	3.16687	4.80163e-28	2.20289e-26	Prom1	5	43993620	44102032	-	7175	protein_coding	prominin 1 [Source:MGI Symbol;Acc:MGI:1100886]	-
ENSMUSG00000026581	391.456	550.264	194.831	128.953	203.893	385.97	17.0624	26.6067	27.9975	20.2134	12.5963	12.7406	309.228	19.5361	3.98308	5.05909e-28	2.31638e-26	Sell	1	164061982	164084181	+	5911	protein_coding	selectin, lymphocyte [Source:MGI Symbol;Acc:MGI:98279]	-
ENSMUSG00000075602	16538.5	18487.7	17214.8	15955	13315.2	23929	4486.56	5576.25	5685.97	5641.87	4805.47	6359.36	17573.4	5425.91	1.69547	5.18676e-28	2.3701e-26	Ly6a	15	74994877	74998031	-	1205	protein_coding	lymphocyte antigen 6 complex, locus A [Source:MGI Symbol;Acc:MGI:107527]	-
ENSMUSG00000022090	85.6919	91.543	32.2568	45.5895	57.1894	86.5302	468.363	511.535	737.817	777.438	436.371	383.127	66.4668	552.442	-3.04812	6.06186e-28	2.76447e-26	Pdlim2	14	70164218	70177681	-	4486	protein_coding	PDZ and LIM domain 2 [Source:MGI Symbol;Acc:MGI:2384850]	-
ENSMUSG00000018143	2936.9	2404.26	2348.3	2173.97	2116.01	2435.37	660.315	856.564	732.877	887.834	602.821	500.522	2402.47	706.822	1.7649	6.1244e-28	2.78745e-26	Mafk	5	139791513	139802653	+	3901	protein_coding	v-maf musculoaponeurotic fibrosarcoma oncogene family, protein K (avian) [Source:MGI Symbol;Acc:MGI:99951]	TF_bZIP
ENSMUSG00000036452	585.237	602.574	434.822	521.023	382.921	463.392	129.674	163.932	136.694	176.478	116.066	145.606	498.328	144.742	1.78388	6.15802e-28	2.7972e-26	Arhgap26	18	38601534	39376284	+	17331	protein_coding	Rho GTPase activating protein 26 [Source:MGI Symbol;Acc:MGI:1918552]	-
ENSMUSG00000001123	12016.3	11369.4	5745.58	4407.86	5005.32	12844	720.887	1059.98	1141.31	1020	603.721	687.99	8564.76	872.314	3.29545	6.27572e-28	2.84503e-26	Lgals9	11	78962974	78984946	-	2137	protein_coding	lectin, galactose binding, soluble 9 [Source:MGI Symbol;Acc:MGI:109496]	-
ENSMUSG00000032690	2052.71	2187.98	1990.89	1203.56	1728.12	3420.22	130.527	112.435	169.632	105.732	254.624	342.175	2097.25	185.854	3.49718	8.28488e-28	3.74846e-26	Oas2	5	120730333	120749853	-	4451	protein_coding	2'-5' oligoadenylate synthetase 2 [Source:MGI Symbol;Acc:MGI:2180852]	-
ENSMUSG00000067279	23047.2	27231.5	29695.6	43892.3	41942.2	20359.6	6368.54	3779.87	2577.42	3136.96	2705.5	1910.17	31028.1	3413.08	3.18441	9.02315e-28	4.07445e-26	Ppp1r3c	19	36731737	36736653	-	2719	protein_coding	protein phosphatase 1, regulatory subunit 3C [Source:MGI Symbol;Acc:MGI:1858229]	-
ENSMUSG00000025178	1699.23	2172.89	1639.94	1959.05	1539.14	1771.59	770.368	763.011	849.808	788.322	701.792	705.281	1796.97	763.097	1.23563	9.33625e-28	4.20755e-26	Pi4k2a	19	42090435	42122218	+	3771	protein_coding	phosphatidylinositol 4-kinase type 2 alpha [Source:MGI Symbol;Acc:MGI:1934031]	-
ENSMUSG00000021708	16.5541	11.0656	5.16109	11.723	11.1892	4.55422	272.998	197.404	93.8741	149.268	107.968	139.236	10.0412	160.125	-3.97962	9.40404e-28	4.22979e-26	Rasgrf2	13	91880400	92131656	-	9237	protein_coding	RAS protein-specific guanine nucleotide-releasing factor 2 [Source:MGI Symbol;Acc:MGI:109137]	-
ENSMUSG00000000901	11.6853	14.0835	2.58054	13.0256	17.4055	4.55422	99.8151	130.459	95.521	134.497	82.7754	123.765	10.5558	111.139	-3.38782	1.00082e-27	4.49271e-26	Mmp11	10	75923222	75936496	-	2778	protein_coding	matrix metallopeptidase 11 [Source:MGI Symbol;Acc:MGI:97008]	-
ENSMUSG00000038467	10276.2	12082.7	9973.8	8671.13	9032.2	14271.8	3512.3	3551.56	4118.11	3972.71	3701.5	3463.61	10718	3719.96	1.5267	1.22362e-27	5.48217e-26	Chmp4b	2	154651705	154694785	+	2027	protein_coding	charged multivesicular body protein 4B [Source:MGI Symbol;Acc:MGI:1922858]	-
ENSMUSG00000070002	1174.37	1056.26	1045.12	1124.11	1168.65	1313.89	479.454	472.054	518.778	598.627	436.371	468.671	1147.07	495.659	1.20993	1.34124e-27	5.99743e-26	Ell	8	70539457	70592858	+	3108	protein_coding	elongation factor RNA polymerase II [Source:MGI Symbol;Acc:MGI:109377]	-
ENSMUSG00000009585	1175.34	1280.6	939.318	704.684	790.706	1283.15	174.89	209.42	235.509	202.911	178.147	308.504	1028.97	218.23	2.23815	1.49564e-27	6.67482e-26	Apobec3	15	79891659	79915906	+	9454	protein_coding	apolipoprotein B mRNA editing enzyme, catalytic polypeptide 3 [Source:MGI Symbol;Acc:MGI:1933111]	-
ENSMUSG00000037185	26.2918	36.2148	20.6444	23.446	23.6217	36.4338	159.533	214.57	288.21	284.542	132.261	169.267	27.7754	208.064	-2.89823	1.58051e-27	7.03985e-26	Krt80	15	101347444	101370162	-	6393	protein_coding	keratin 80 [Source:MGI Symbol;Acc:MGI:1921377]	-
ENSMUSG00000020430	1906.64	1855	1580.58	1758.45	1708.22	2206.52	907.72	881.454	867.924	827.971	807.96	807.206	1835.9	850.039	1.1112	1.61844e-27	7.19483e-26	Pes1	11	3963975	3980004	+	3024	protein_coding	pescadillo ribosomal biogenesis factor 1 [Source:MGI Symbol;Acc:MGI:1890613]	-
ENSMUSG00000032942	12732.1	13901.5	17097.4	18389.5	20063.5	9872.41	2150.72	2226.38	1427.87	1403.28	2953.82	3402.64	15342.7	2260.78	2.76273	1.62395e-27	7.20539e-26	Ucp3	7	100472990	100486432	+	3135	protein_coding	uncoupling protein 3 (mitochondrial, proton carrier) [Source:MGI Symbol;Acc:MGI:1099787]	-
ENSMUSG00000002058	93.4821	124.74	162.574	147.189	182.758	128.657	426.56	540.717	606.888	590.075	466.961	495.972	139.9	521.196	-1.9026	1.73212e-27	7.67049e-26	Unc119	11	78343482	78349164	+	2448	protein_coding	unc-119 lipid binding chaperone [Source:MGI Symbol;Acc:MGI:1328357]	-
ENSMUSG00000115338	4728.63	5476.48	4398.54	2601.21	3519.64	8616.59	389.023	564.748	810.282	771.996	521.845	640.668	4890.18	616.427	2.98782	1.76346e-27	7.7942e-26	Pnp	14	50931082	50965237	+	3979	protein_coding	purine-nucleoside phosphorylase [Source:MGI Symbol;Acc:MGI:97365]	-
ENSMUSG00000097194	125.617	93.5549	78.7066	45.5895	85.7841	124.103	6.82496	10.2994	5.7642	3.88719	4.49867	9.1004	92.2257	6.72913	3.78746	1.85902e-27	8.20077e-26	9330175E14Rik	8	94422898	94435103	-	5938	lincRNA	RIKEN cDNA 9330175E14 gene [Source:MGI Symbol;Acc:MGI:2443913]	-
novel.370	262.918	348.064	230.959	108.112	177.785	514.627	1.70624	0.85828	10.7049	14.7713	3.59893	4.5502	273.744	6.03165	5.48918	2.04235e-27	8.99223e-26	-	5	114912978	114916112	+	1244	-	- && - && -	-
ENSMUSG00000086801	134.38	77.4594	180.638	98.9944	190.217	67.1748	8.5312	9.44108	4.11728	6.99694	4.49867	12.7406	124.811	7.72096	4.01813	2.47196e-27	1.08629e-25	Gm15943	15	58214475	58324053	+	3821	antisense	predicted gene 15943 [Source:MGI Symbol;Acc:MGI:3802102]	-
ENSMUSG00000012483	72.0591	114.68	119.995	130.256	130.541	154.844	489.691	522.693	443.843	368.506	515.547	572.415	120.396	485.449	-2.01474	2.52988e-27	1.10962e-25	Rpa3	6	8255936	8259173	-	1136	protein_coding	replication protein A3 [Source:MGI Symbol;Acc:MGI:1915490]	-
ENSMUSG00000025578	21.423	22.1313	5.16109	28.6563	21.1352	10.247	139.059	147.624	120.225	142.271	149.356	110.115	18.1256	134.775	-2.88855	2.79415e-27	1.22319e-25	Cbx8	11	119036305	119040969	-	3675	protein_coding	chromobox 8 [Source:MGI Symbol;Acc:MGI:1353589]	-
ENSMUSG00000038279	1304.85	1052.24	1100.6	1030.32	1010.76	1567.79	409.498	417.124	410.905	436.143	348.197	327.614	1177.76	391.58	1.58853	2.98354e-27	1.30361e-25	Nop2	6	125131909	125144753	+	2772	protein_coding	NOP2 nucleolar protein [Source:MGI Symbol;Acc:MGI:107891]	-
ENSMUSG00000048450	93.4821	58.3461	46.4498	71.6407	58.4327	72.8675	216.693	241.177	245.39	264.329	221.334	245.711	66.8698	239.106	-1.83124	3.00643e-27	1.31111e-25	Msx1	5	37820485	37824583	-	3097	protein_coding	msh homeobox 1 [Source:MGI Symbol;Acc:MGI:97168]	Homeobox
ENSMUSG00000078651	59.4001	95.5668	68.3844	83.3637	103.19	77.4218	8.5312	6.00796	8.23457	14.7713	13.496	7.28032	81.2211	9.72023	3.05598	3.01406e-27	1.31195e-25	Aoc2	11	101325063	101329702	+	2543	protein_coding	amine oxidase, copper containing 2 (retina-specific) [Source:MGI Symbol;Acc:MGI:2668431]	-
ENSMUSG00000028551	181.122	230.366	336.761	225.343	267.298	200.386	899.189	931.234	870.394	732.346	698.193	964.643	240.213	849.333	-1.82449	3.54711e-27	1.54104e-25	Cdkn2c	4	109660876	109667189	-	2686	protein_coding	cyclin dependent kinase inhibitor 2C [Source:MGI Symbol;Acc:MGI:105388]	-
ENSMUSG00000029521	15.5803	4.02387	11.6124	13.0256	11.1892	3.41567	99.8151	68.6624	106.226	124.39	124.163	107.385	9.80786	105.107	-3.43035	3.85042e-27	1.66966e-25	Chek2	5	110839979	110874145	+	3001	protein_coding	checkpoint kinase 2 [Source:MGI Symbol;Acc:MGI:1355321]	-
ENSMUSG00000003617	12778.8	12543.4	6837.15	6338.25	6583	9634.46	715.768	1317.46	1100.14	922.819	341.899	437.729	9119.18	805.969	3.50001	4.78046e-27	2.06904e-25	Cp	3	19957054	20009145	+	9566	protein_coding	ceruloplasmin [Source:MGI Symbol;Acc:MGI:88476]	-
ENSMUSG00000056501	7143.59	6516.65	9326.09	10802.1	8521.23	6791.48	2188.25	2587.71	2917.51	2928.61	2529.15	2594.52	8183.52	2624.29	1.64064	4.93478e-27	2.13181e-25	Cebpb	2	167688915	167690418	+	1504	protein_coding	CCAAT/enhancer binding protein (C/EBP), beta [Source:MGI Symbol;Acc:MGI:88373]	C/EBP
ENSMUSG00000040435	1594.06	1259.47	1397.36	1652.95	1212.17	1362.85	595.478	538.142	437.256	412.042	444.468	366.746	1413.14	465.689	1.6014	5.69548e-27	2.4558e-25	Ppp1r15a	7	45522916	45526268	-	2937	protein_coding	protein phosphatase 1, regulatory subunit 15A [Source:MGI Symbol;Acc:MGI:1927072]	-
ENSMUSG00000063605	81.7968	53.3162	42.579	80.7586	52.2164	83.1145	333.57	300.398	405.964	378.612	248.326	265.732	65.6303	322.1	-2.29297	6.06146e-27	2.6087e-25	Ccdc102a	8	94902869	94918098	-	2504	protein_coding	coiled-coil domain containing 102A [Source:MGI Symbol;Acc:MGI:2686927]	-
ENSMUSG00000032402	4959.42	4013.81	4665.62	4940.6	4285.48	2617.54	1408.5	1218.76	907.45	995.12	948.319	883.649	4247.08	1060.3	2.00195	6.78587e-27	2.915e-25	Smad3	9	63646767	63757994	-	5542	protein_coding	SMAD family member 3 [Source:MGI Symbol;Acc:MGI:1201674]	MH1
ENSMUSG00000015656	41704.7	41043.4	49266.5	48658.3	43725.1	42373.6	20583.2	17656.5	20695.1	19411.1	24408	20922.7	44461.9	20612.8	1.10902	7.37654e-27	3.16281e-25	Hspa8	9	40800984	40810087	+	4301	protein_coding	heat shock protein 8 [Source:MGI Symbol;Acc:MGI:105384]	-
ENSMUSG00000027829	2220.2	2275.5	3446.32	4083.52	3145.42	2934.06	545.997	562.174	528.659	557.423	814.258	907.31	3017.5	652.637	2.20909	7.51867e-27	3.21774e-25	Ccnl1	3	65946151	65958249	-	5997	protein_coding	cyclin L1 [Source:MGI Symbol;Acc:MGI:1922664]	-
ENSMUSG00000014303	68.164	51.3043	18.0638	49.4972	36.0542	81.976	462.391	518.401	1285.42	1390.06	571.331	573.325	50.8433	800.154	-3.97203	7.84891e-27	3.35281e-25	Glis2	16	4594713	4624924	+	4373	protein_coding	GLIS family zinc finger 2 [Source:MGI Symbol;Acc:MGI:1932535]	zf-C2H2
ENSMUSG00000046768	5804.65	6944.19	3718.56	4501.64	3969.69	7279.92	1042.51	1064.27	1427.87	1398.61	888.936	967.373	5369.78	1131.6	2.24646	1.53183e-26	6.53136e-25	Rhoj	12	75308322	75401456	+	6484	protein_coding	ras homolog family member J [Source:MGI Symbol;Acc:MGI:1931551]	-
ENSMUSG00000046916	6.8164	10.0597	11.6124	19.5384	11.1892	1.13856	255.936	187.963	108.696	129.055	354.495	324.884	10.0591	226.838	-4.51308	1.55372e-26	6.61238e-25	Myct1	10	5593775	5606904	+	2845	protein_coding	myc target 1 [Source:MGI Symbol;Acc:MGI:1915882]	-
ENSMUSG00000022180	1236.69	1104.55	1248.98	1939.51	1312.87	703.627	240.58	260.917	292.327	265.106	298.711	283.933	1257.71	273.596	2.20041	1.58456e-26	6.73117e-25	Slc7a8	14	54722209	54781946	-	5005	protein_coding	solute carrier family 7 (cationic amino acid transporter, y+ system), member 8 [Source:MGI Symbol;Acc:MGI:1355323]	-
ENSMUSG00000047473	27.2656	26.1551	38.7082	41.6819	23.6217	23.9097	127.115	120.159	123.519	121.28	110.667	113.755	30.2237	119.416	-1.99653	1.60113e-26	6.78899e-25	Zfp30	7	29783998	29794702	+	6078	protein_coding	zinc finger protein 30 [Source:MGI Symbol;Acc:MGI:99178]	zf-C2H2
ENSMUSG00000035208	2884.31	3453.48	1821.86	713.802	1391.2	3203.9	102.374	122.734	222.333	248.78	117.865	148.337	2244.76	160.404	3.80638	1.66511e-26	7.04725e-25	Slfn8	11	83002158	83020810	-	4091	protein_coding	schlafen 8 [Source:MGI Symbol;Acc:MGI:2672859]	-
ENSMUSG00000030865	21.423	18.1074	11.6124	0	2.4865	4.55422	380.492	408.541	321.148	307.865	183.546	221.14	9.69726	303.789	-4.9344	1.68319e-26	7.11062e-25	Chp2	7	122219496	122222824	+	1603	protein_coding	calcineurin-like EF hand protein 2 [Source:MGI Symbol;Acc:MGI:1917511]	-
ENSMUSG00000053559	70.1116	80.4773	107.093	70.3381	52.2164	60.3434	255.936	259.201	312.09	252.667	348.197	338.535	73.4299	294.438	-2.00453	1.71276e-26	7.22226e-25	Smagp	15	100621339	100636940	-	1464	protein_coding	small cell adhesion glycoprotein [Source:MGI Symbol;Acc:MGI:2448476]	-
ENSMUSG00000033706	693.325	641.807	459.337	539.259	610.435	841.392	209.868	212.854	205.864	198.247	191.643	210.219	630.926	204.782	1.62443	1.82712e-26	7.69034e-25	Smyd5	6	85431989	85446435	+	5849	protein_coding	SET and MYND domain containing 5 [Source:MGI Symbol;Acc:MGI:108048]	-
ENSMUSG00000018537	19.4754	27.1611	27.0957	15.6307	24.865	11.3856	111.759	127.884	225.627	207.576	134.96	150.157	20.9356	159.66	-2.93119	1.97142e-26	8.28249e-25	Pcgf2	11	97688823	97700497	-	3526	protein_coding	polycomb group ring finger 2 [Source:MGI Symbol;Acc:MGI:99161]	-
ENSMUSG00000024210	3144.31	3578.22	4504.34	4772.57	4762.89	2280.53	724.299	473.771	438.903	487.453	949.218	734.402	3840.48	634.674	2.59735	2.1609e-26	9.06194e-25	Ip6k3	17	27143969	27167764	-	2307	protein_coding	inositol hexaphosphate kinase 3 [Source:MGI Symbol;Acc:MGI:3045325]	-
ENSMUSG00000079168	10.7115	60.358	15.4833	9.1179	6.21624	18.2169	421.441	682.333	652.178	615.731	294.213	428.629	20.0173	515.754	-4.6725	2.48121e-26	1.03673e-24	Cd209g	8	4134098	4137707	+	3610	protein_coding	CD209g antigen [Source:MGI Symbol;Acc:MGI:1917442]	-
ENSMUSG00000001627	4135.61	4356.84	5345.6	5109.93	4922.02	5057.46	1818.85	1465.94	1417.17	1033.99	1913.73	1530.69	4821.24	1530.06	1.65589	2.65821e-26	1.10867e-24	Ifrd1	12	40201567	40248504	-	5858	protein_coding	interferon-related developmental regulator 1 [Source:MGI Symbol;Acc:MGI:1316717]	-
ENSMUSG00000048826	13.6328	25.1492	6.45136	11.723	12.4325	35.2952	386.463	508.96	415.022	668.597	142.158	209.309	17.4473	388.418	-4.46742	2.93586e-26	1.22225e-24	Dact2	17	14195052	14204304	-	3379	protein_coding	dishevelled-binding antagonist of beta-catenin 2 [Source:MGI Symbol;Acc:MGI:1920347]	-
ENSMUSG00000105941	73.0329	50.2983	113.544	59.9177	69.6219	56.9278	1.70624	7.72452	3.29383	3.88719	0.899733	2.73012	70.5571	3.37361	4.37446	3.35712e-26	1.39509e-24	Gm42809	3	89912916	89914053	+	1138	antisense	predicted gene 42809 [Source:MGI Symbol;Acc:MGI:5662946]	-
ENSMUSG00000015652	183.069	165.984	132.898	145.886	85.7841	333.597	8.5312	5.14968	13.1753	13.9939	1.79947	11.8305	174.536	9.08001	4.25815	3.39892e-26	1.4099e-24	Steap1	5	5736317	5749326	-	1377	protein_coding	six transmembrane epithelial antigen of the prostate 1 [Source:MGI Symbol;Acc:MGI:1917608]	-
ENSMUSG00000032487	1052.65	605.592	429.661	252.696	412.759	1148.8	58.0122	42.914	36.2321	49.756	50.3851	18.2008	650.359	42.5834	3.93255	3.58152e-26	1.48297e-24	Ptgs2	1	150100031	150108227	+	4580	protein_coding	prostaglandin-endoperoxide synthase 2 [Source:MGI Symbol;Acc:MGI:97798]	-
ENSMUSG00000048458	82.7706	41.2446	52.9012	58.6151	44.7569	28.4639	307.976	274.65	280.799	289.984	339.199	204.759	51.4587	282.895	-2.45544	4.15199e-26	1.71608e-24	Inka2	3	105704599	105720842	+	4781	protein_coding	inka box actin regulator 2 [Source:MGI Symbol;Acc:MGI:1923497]	-
ENSMUSG00000046668	179.174	194.152	316.117	169.333	228.758	166.229	836.911	709.798	740.288	688.032	670.301	710.741	208.96	726.012	-1.79913	4.40176e-26	1.81604e-24	Cxxc5	18	35829818	35861687	+	2271	protein_coding	CXXC finger 5 [Source:MGI Symbol;Acc:MGI:1914643]	-
ENSMUSG00000042106	18.5017	30.179	30.9665	32.5639	21.1352	28.4639	142.471	96.1274	114.461	115.061	123.263	137.416	26.9684	121.467	-2.17869	4.72633e-26	1.94645e-24	Inka1	9	107984223	107985879	-	1156	protein_coding	inka box actin regulator 1 [Source:MGI Symbol;Acc:MGI:1915426]	-
ENSMUSG00000046223	2274.73	1919.38	1552.2	1798.83	1481.95	2772.38	156.974	142.475	377.143	300.868	111.567	118.305	1966.58	201.222	3.28799	5.40567e-26	2.22223e-24	Plaur	7	24462484	24475968	+	2617	protein_coding	plasminogen activator, urokinase receptor [Source:MGI Symbol;Acc:MGI:97612]	-
ENSMUSG00000020178	235.653	236.402	207.734	158.912	159.136	150.289	44.3622	36.9061	43.6432	38.0945	47.6859	60.0627	191.354	45.1257	2.08961	5.43781e-26	2.23145e-24	Adora2a	10	75316877	75334784	+	3062	protein_coding	adenosine A2a receptor [Source:MGI Symbol;Acc:MGI:99402]	-
ENSMUSG00000033705	68.164	45.2685	12.9027	14.3281	31.0812	22.7711	383.904	406.825	305.503	373.17	380.587	589.706	32.4193	406.616	-3.63209	5.83651e-26	2.39078e-24	Stard9	2	120629121	120731895	+	22053	protein_coding	START domain containing 9 [Source:MGI Symbol;Acc:MGI:3045258]	-
ENSMUSG00000026930	75.9542	82.4893	54.1914	69.0356	67.1354	64.8977	203.896	208.562	209.982	269.771	196.142	205.669	68.9506	215.67	-1.63954	5.98455e-26	2.44705e-24	Gpsm1	2	26315515	26348237	+	5383	protein_coding	G-protein signalling modulator 1 (AGS3-like, C. elegans) [Source:MGI Symbol;Acc:MGI:1915089]	-
ENSMUSG00000049659	2897.94	3566.15	2789.57	1917.37	2114.77	4261.61	599.743	634.269	728.759	823.307	608.22	624.288	2924.57	669.764	2.12649	6.28107e-26	2.56373e-24	Aftph	11	20685084	20741589	-	6979	protein_coding	aftiphilin [Source:MGI Symbol;Acc:MGI:1923012]	-
ENSMUSG00000004040	11922.9	11253.7	8037.1	7540.51	7831.22	11165.8	1965.59	1937.14	2783.28	3071.66	1784.17	1657.18	9625.21	2199.84	2.12937	6.65346e-26	2.7109e-24	Stat3	11	100885098	100939540	-	9527	protein_coding	signal transducer and activator of transcription 3 [Source:MGI Symbol;Acc:MGI:103038]	STAT
ENSMUSG00000027381	638.794	636.777	526.431	437.659	461.245	437.205	179.155	174.231	170.456	179.588	126.862	138.326	523.019	161.436	1.69616	6.78096e-26	2.75795e-24	Bcl2l11	2	128126038	128162547	+	8029	protein_coding	BCL2-like 11 (apoptosis facilitator) [Source:MGI Symbol;Acc:MGI:1197519]	-
ENSMUSG00000025648	3963.25	4337.73	4550.79	6206.69	5030.18	2761	1253.23	1047.1	883.569	774.328	1003.2	1267.69	4474.94	1038.19	2.10784	7.46843e-26	3.03218e-24	Pfkfb4	9	108991778	109032228	+	4875	protein_coding	6-phosphofructo-2-kinase/fructose-2,6-biphosphatase 4 [Source:MGI Symbol;Acc:MGI:2687284]	-
ENSMUSG00000036862	43.8197	47.2804	16.7735	29.9588	16.1622	21.6326	209.014	177.664	209.158	204.466	173.648	168.357	29.2712	190.385	-2.68158	7.83342e-26	3.17475e-24	Dchs1	7	105752990	105787654	-	11052	protein_coding	dachsous cadherin related 1 [Source:MGI Symbol;Acc:MGI:2685011]	-
ENSMUSG00000045287	9.73772	31.185	14.193	11.723	3.72975	9.10844	234.608	209.42	326.912	356.067	137.659	149.247	13.2795	235.652	-4.13487	8.36924e-26	3.38593e-24	Rtn4rl1	11	75193783	75267769	+	3525	protein_coding	reticulon 4 receptor-like 1 [Source:MGI Symbol;Acc:MGI:2661375]	-
ENSMUSG00000033585	379.771	557.305	295.472	346.48	360.542	536.26	1415.33	1368.1	1808.31	1764.01	1357.7	1521.59	412.638	1539.17	-1.89789	8.82189e-26	3.56277e-24	Ndn	7	62346569	62350262	+	3694	protein_coding	necdin [Source:MGI Symbol;Acc:MGI:97290]	-
ENSMUSG00000026458	12.659	20.1193	20.6444	20.8409	19.892	12.5241	101.521	84.1115	95.521	94.07	76.4773	117.395	17.78	94.8494	-2.42748	1.00291e-25	4.04319e-24	Ppfia4	1	134296783	134332928	-	6572	protein_coding	protein tyrosine phosphatase, receptor type, f polypeptide (PTPRF), interacting protein (liprin), alpha 4 [Source:MGI Symbol;Acc:MGI:1915757]	-
ENSMUSG00000032484	132.433	292.736	90.319	143.281	139.244	100.193	0	0	0.823457	0	0	0	149.701	0.137243	9.41973	1.0399e-25	4.18495e-24	Ngp	9	110419747	110423012	+	1222	protein_coding	neutrophilic granule protein [Source:MGI Symbol;Acc:MGI:105983]	-
ENSMUSG00000040688	778.043	832.94	758.68	722.92	694.976	886.935	391.582	332.154	377.143	358.399	355.395	407.698	779.082	370.395	1.07368	1.13485e-25	4.55909e-24	Tbl3	17	24697949	24707660	-	5686	protein_coding	transducin (beta)-like 3 [Source:MGI Symbol;Acc:MGI:2384863]	-
ENSMUSG00000038587	6123.08	5474.47	3647.6	3364.51	2807.26	2608.43	772.927	829.957	800.4	922.819	606.42	718.022	4004.22	775.091	2.36913	1.36722e-25	5.483e-24	Akap12	10	4266380	4359470	+	6461	protein_coding	A kinase (PRKA) anchor protein (gravin) 12 [Source:MGI Symbol;Acc:MGI:1932576]	-
ENSMUSG00000025978	90.5608	84.5012	56.772	50.7998	58.4327	62.6206	216.693	231.736	272.564	276.768	237.53	219.32	67.2812	242.435	-1.8381	1.38092e-25	5.52827e-24	Rftn2	1	55170159	55226782	-	5871	protein_coding	raftlin family member 2 [Source:MGI Symbol;Acc:MGI:1921263]	-
ENSMUSG00000045932	6647.94	13250.6	4952.06	1467.98	2868.17	6645.75	275.558	323.572	359.851	514.664	260.023	277.562	5972.08	335.205	4.15499	1.41989e-25	5.67435e-24	Ifit2	19	34550694	34576419	+	3927	protein_coding	interferon-induced protein with tetratricopeptide repeats 2 [Source:MGI Symbol;Acc:MGI:99449]	-
ENSMUSG00000021719	5.84263	8.04773	3.87082	2.60512	1.24325	7.96989	81.0464	74.6704	68.3469	111.951	71.0789	53.6924	4.92991	76.7977	-3.91777	1.56357e-25	6.23769e-24	Rgs7bp	13	104945904	105054930	-	7077	protein_coding	regulator of G-protein signalling 7 binding protein [Source:MGI Symbol;Acc:MGI:106334]	-
ENSMUSG00000017057	4766.61	4666.68	2612.8	1939.51	2309.96	6818.81	369.401	500.377	472.664	566.752	287.915	390.407	3852.39	431.253	3.15907	1.62689e-25	6.47902e-24	Il13ra1	X	36112110	36171259	+	3712	protein_coding	interleukin 13 receptor, alpha 1 [Source:MGI Symbol;Acc:MGI:105052]	-
ENSMUSG00000040528	542.391	795.72	508.367	233.158	329.461	874.411	41.8029	48.922	60.1124	83.9633	58.4827	50.0522	547.251	57.2226	3.25696	1.63572e-25	6.5029e-24	Milr1	11	106751226	106768794	+	2474	protein_coding	mast cell immunoglobulin like receptor 1 [Source:MGI Symbol;Acc:MGI:2685731]	-
ENSMUSG00000031530	23.3705	22.1313	16.7735	7.81535	6.21624	10.247	130.527	148.482	90.5803	181.92	161.952	120.125	14.4257	138.931	-3.24097	2.02024e-25	8.01768e-24	Dusp4	8	34807297	34819894	+	2740	protein_coding	dual specificity phosphatase 4 [Source:MGI Symbol;Acc:MGI:2442191]	-
ENSMUSG00000002289	11565.5	9054.7	5806.22	7031.21	5893	10426.9	1026.3	989.597	1254.12	601.737	278.917	470.491	8296.25	770.195	3.42909	2.0809e-25	8.24418e-24	Angptl4	17	33773750	33781575	-	3286	protein_coding	angiopoietin-like 4 [Source:MGI Symbol;Acc:MGI:1888999]	-
ENSMUSG00000024042	1928.07	1752.39	1605.1	1619.08	1351.41	1079.35	471.775	375.068	400.2	490.563	255.524	347.635	1555.9	390.128	1.99541	2.146e-25	8.48742e-24	Sik1	17	31844248	31855792	-	4511	protein_coding	salt inducible kinase 1 [Source:MGI Symbol;Acc:MGI:104754]	-
ENSMUSG00000054321	439.171	413.452	296.763	274.84	253.623	490.717	71.6621	79.8201	51.8778	66.0822	45.8864	91.9141	361.428	67.8738	2.41481	2.35818e-25	9.31054e-24	Taf4b	18	14783245	14900359	+	5149	protein_coding	TATA-box binding protein associated factor 4b [Source:MGI Symbol;Acc:MGI:2152345]	-
ENSMUSG00000036918	409.958	402.387	405.145	412.911	328.218	350.675	910.279	907.202	1031.79	1140.5	852.947	805.386	384.882	941.351	-1.29036	2.41504e-25	9.51865e-24	Ttc7	17	87282886	87381769	+	6315	protein_coding	tetratricopeptide repeat domain 7 [Source:MGI Symbol;Acc:MGI:1920999]	-
ENSMUSG00000024678	3439.36	4485.6	3047.62	2266.45	2548.66	4443.78	869.329	883.17	891.804	997.453	811.559	940.982	3371.91	899.05	1.90725	2.63392e-25	1.03636e-23	Ms4a4d	19	11536801	11558467	+	1513	protein_coding	membrane-spanning 4-domains, subfamily A, member 4D [Source:MGI Symbol;Acc:MGI:1913857]	-
ENSMUSG00000024247	848.155	818.857	725.133	759.391	711.138	942.724	4036.11	3131.86	3131.61	2868.75	2183.65	2012.1	800.9	2894.01	-1.85313	2.67746e-25	1.05168e-23	Pkdcc	17	83215292	83225070	+	2712	protein_coding	protein kinase domain containing, cytoplasmic [Source:MGI Symbol;Acc:MGI:2147077]	-
ENSMUSG00000033909	981.562	935.549	771.583	988.641	911.301	1019.01	431.679	457.463	431.491	499.893	469.661	444.1	934.607	455.714	1.03653	2.71234e-25	1.06356e-23	Usp36	11	118259651	118290244	-	7689	protein_coding	ubiquitin specific peptidase 36 [Source:MGI Symbol;Acc:MGI:1919594]	-
ENSMUSG00000026749	2116.01	2098.45	1362.53	1234.82	1166.17	2264.59	363.429	388.801	417.493	335.853	218.635	283.022	1707.09	334.539	2.35134	2.91521e-25	1.14116e-23	Nek6	2	38511643	38594606	+	10714	protein_coding	NIMA (never in mitosis gene a)-related expressed kinase 6 [Source:MGI Symbol;Acc:MGI:1891638]	-
ENSMUSG00000047368	1347.7	1734.29	1470.91	1576.09	1366.33	1595.12	741.361	673.75	622.533	567.53	761.174	652.499	1515.07	669.808	1.178	3.01298e-25	1.17742e-23	Abhd17b	19	21653309	21685637	+	2475	protein_coding	abhydrolase domain containing 17B [Source:MGI Symbol;Acc:MGI:1917816]	-
ENSMUSG00000040345	35.0558	69.4117	32.2568	40.3793	28.5947	36.4338	188.54	225.728	355.733	228.567	204.239	236.61	40.3553	239.903	-2.56385	3.07017e-25	1.19773e-23	Arhgap9	10	127321964	127329943	+	3787	protein_coding	Rho GTPase activating protein 9 [Source:MGI Symbol;Acc:MGI:2143764]	-
ENSMUSG00000034394	598.87	462.745	374.179	256.604	256.109	625.067	70.809	54.0717	80.6988	63.7499	50.3851	40.0418	428.929	59.9594	2.83832	3.10275e-25	1.20839e-23	Lif	11	4257557	4272514	+	4350	protein_coding	leukemia inhibitory factor [Source:MGI Symbol;Acc:MGI:96787]	-
ENSMUSG00000055200	87.6394	94.5609	89.0288	112.02	123.082	122.964	258.495	269.5	295.621	277.545	322.104	279.382	104.882	283.775	-1.43932	3.16852e-25	1.23191e-23	Sertad3	7	27473768	27477364	+	1329	protein_coding	SERTA domain containing 3 [Source:MGI Symbol;Acc:MGI:2180697]	-
ENSMUSG00000025723	49.6624	50.2983	56.772	39.0767	50.9732	40.988	216.693	371.635	196.806	378.612	188.944	393.137	47.9618	290.971	-2.60058	3.34458e-25	1.29816e-23	Nmb	7	80902227	80905076	-	793	protein_coding	neuromedin B [Source:MGI Symbol;Acc:MGI:1915289]	-
ENSMUSG00000022534	74.0066	91.543	45.1595	66.4304	50.9732	79.6989	8.5312	5.14968	6.58766	8.55182	5.3984	10.0104	67.9686	7.37153	3.20982	3.47354e-25	1.34594e-23	Mefv	16	3707218	3718097	-	3251	protein_coding	Mediterranean fever [Source:MGI Symbol;Acc:MGI:1859396]	-
ENSMUSG00000000318	159.699	328.951	199.992	290.47	114.379	285.777	1125.27	1335.48	1417.99	1813.76	1099.47	1638.98	229.878	1405.16	-2.61144	3.80198e-25	1.47072e-23	Clec10a	11	70156197	70170834	+	2899	protein_coding	C-type lectin domain family 10, member A [Source:MGI Symbol;Acc:MGI:96975]	-
ENSMUSG00000020156	297	287.706	287.731	313.916	312.055	314.241	673.965	717.522	646.414	679.481	847.549	943.712	302.108	751.44	-1.31452	4.12493e-25	1.59091e-23	Mum1	10	80226434	80243903	+	10361	protein_coding	melanoma associated antigen (mutated) 1 [Source:MGI Symbol;Acc:MGI:1915364]	-
ENSMUSG00000040860	22.3967	17.1014	14.193	13.0256	14.919	14.8012	94.6963	90.9777	99.6383	97.1797	116.066	64.6129	16.0728	93.8617	-2.5296	4.12655e-25	1.59091e-23	Crocc	4	141016637	141060550	-	8266	protein_coding	ciliary rootlet coiled-coil, rootletin [Source:MGI Symbol;Acc:MGI:3529431]	-
ENSMUSG00000044345	176.253	240.426	92.8996	136.769	92.0004	184.446	988.766	1143.23	2091.58	2307.44	898.833	1101.15	153.799	1421.83	-3.20634	4.30752e-25	1.65789e-23	Marveld1	19	42147400	42151703	+	4304	protein_coding	MARVEL (membrane-associating) domain containing 1 [Source:MGI Symbol;Acc:MGI:2147570]	-
ENSMUSG00000038233	0	5.02983	1.29027	2.60512	3.72975	0	62.2778	68.6624	73.2877	59.0853	97.1712	98.2843	2.10916	76.4614	-5.18585	4.9857e-25	1.91569e-23	Fam198a	9	121950988	121980209	+	3871	protein_coding	family with sequence similarity 198, member A [Source:MGI Symbol;Acc:MGI:3041196]	-
ENSMUSG00000046865	2022.52	1919.38	1984.44	2276.87	1935.74	3257.41	557.087	652.293	783.108	723.017	735.082	741.683	2232.73	698.712	1.67601	5.31178e-25	2.03757e-23	Fbl	7	28169710	28179269	+	4209	protein_coding	fibrillarin [Source:MGI Symbol;Acc:MGI:95486]	-
ENSMUSG00000016933	328.161	293.742	290.311	304.799	308.326	237.958	779.752	739.838	665.353	929.038	640.61	739.863	293.883	749.076	-1.34985	5.71577e-25	2.18888e-23	Plcg1	2	160731300	160775760	+	7857	protein_coding	phospholipase C, gamma 1 [Source:MGI Symbol;Acc:MGI:97615]	-
ENSMUSG00000013921	96.4034	78.4654	41.2887	61.2202	54.7029	81.976	233.755	332.154	354.91	310.975	277.118	291.213	69.0094	300.021	-2.11084	5.74942e-25	2.1981e-23	Clip3	7	30291728	30308367	+	3935	protein_coding	CAP-GLY domain containing linker protein 3 [Source:MGI Symbol;Acc:MGI:1923936]	-
ENSMUSG00000028633	4834.78	3655.68	2832.15	2700.2	2968.88	6151.62	563.912	478.92	792.166	876.95	466.961	428.629	3857.22	601.256	2.68131	5.82296e-25	2.21882e-23	Ctps	4	120539868	120570276	-	3316	protein_coding	cytidine 5'-triphosphate synthase [Source:MGI Symbol;Acc:MGI:1858304]	-
ENSMUSG00000095298	37.9771	73.4356	70.965	53.4049	53.4597	54.6507	2.55936	0.85828	1.64691	0.777438	5.3984	0.91004	57.3155	2.02507	4.84424	5.88949e-25	2.24045e-23	Gm12407	4	41791989	41793601	-	324	unprocessed_pseudogene	predicted gene 12407 [Source:MGI Symbol;Acc:MGI:3693096]	-
ENSMUSG00000024486	1182.16	1175.97	1042.54	1383.32	1094.06	816.344	208.161	136.467	111.167	65.3048	256.424	154.707	1115.73	155.372	2.84531	6.19035e-25	2.351e-23	Hbegf	18	36504929	36515805	-	2373	protein_coding	heparin-binding EGF-like growth factor [Source:MGI Symbol;Acc:MGI:96070]	-
ENSMUSG00000029428	212.282	148.883	103.222	79.456	79.5679	176.476	677.377	771.594	927.213	943.032	664.903	802.655	133.315	797.796	-2.57637	6.45676e-25	2.44812e-23	Stx2	5	128984557	129008574	-	4586	protein_coding	syntaxin 2 [Source:MGI Symbol;Acc:MGI:108059]	-
ENSMUSG00000027524	0.973772	6.0358	3.87082	3.90767	3.72975	13.6627	88.7245	81.5366	60.9358	62.195	85.4746	93.7341	5.36341	78.7668	-3.87865	7.42188e-25	2.80941e-23	Edn3	2	174760619	174784042	+	4113	protein_coding	endothelin 3 [Source:MGI Symbol;Acc:MGI:95285]	-
ENSMUSG00000030589	24.3443	38.2267	16.7735	22.1435	28.5947	21.6326	121.996	135.608	171.279	113.506	183.546	220.23	25.2859	157.694	-2.62979	7.5253e-25	2.84387e-23	Rasgrp4	7	29134851	29153961	+	6363	protein_coding	RAS guanyl releasing protein 4 [Source:MGI Symbol;Acc:MGI:2386851]	-
ENSMUSG00000043099	157.751	110.656	78.7066	63.8253	53.4597	86.5302	579.269	670.317	734.524	527.103	543.439	393.137	91.8215	574.631	-2.63902	7.67022e-25	2.89387e-23	Hic1	11	75164565	75169519	-	3750	protein_coding	hypermethylated in cancer 1 [Source:MGI Symbol;Acc:MGI:1338010]	ZBTB
ENSMUSG00000032754	164.567	172.02	145.801	218.83	200.163	184.446	427.413	532.992	443.02	437.697	434.571	520.543	180.971	466.039	-1.36628	7.72332e-25	2.90912e-23	Slc8b1	5	120511168	120534024	+	3463	protein_coding	solute carrier family 8 (sodium/lithium/calcium exchanger), member B1 [Source:MGI Symbol;Acc:MGI:2180781]	-
ENSMUSG00000054418	7.79017	4.02387	0	1.30256	1.24325	1.13856	75.9277	58.3631	69.1704	74.634	55.7835	92.8241	2.58307	71.1171	-4.66221	8.38859e-25	3.15452e-23	2900041M22Rik	11	117611247	117613857	+	1784	processed_transcript	RIKEN cDNA 2900041M22 gene [Source:MGI Symbol;Acc:MGI:1925653]	-
ENSMUSG00000032249	735.198	753.469	726.423	864.898	733.517	611.404	1395.7	1471.09	1511.04	1653.61	1499.86	1598.94	737.485	1521.71	-1.04554	8.71768e-25	3.2697e-23	Anp32a	9	62341293	62378812	+	3166	protein_coding	acidic (leucine-rich) nuclear phosphoprotein 32 family, member A [Source:MGI Symbol;Acc:MGI:108447]	-
ENSMUSG00000027330	54.5312	26.1551	19.3541	23.446	16.1622	22.7711	142.471	195.688	201.747	180.366	194.342	165.627	27.07	180.04	-2.71338	8.72339e-25	3.2697e-23	Cdc25b	2	131186949	131198497	+	3728	protein_coding	cell division cycle 25B [Source:MGI Symbol;Acc:MGI:99701]	-
ENSMUSG00000020275	622.24	797.731	434.822	251.394	443.84	645.561	104.081	96.1274	88.1099	94.07	74.6778	70.9831	532.598	88.0081	2.59784	9.13893e-25	3.41987e-23	Rel	11	23736847	23770970	-	7466	protein_coding	reticuloendotheliosis oncogene [Source:MGI Symbol;Acc:MGI:97897]	RHD
ENSMUSG00000049103	192.807	202.199	118.705	177.148	152.92	259.591	531.494	730.396	652.178	641.386	699.992	690.72	183.895	657.695	-1.83583	9.76491e-25	3.64816e-23	Ccr2	9	124101950	124113557	+	6760	protein_coding	chemokine (C-C motif) receptor 2 [Source:MGI Symbol;Acc:MGI:106185]	-
ENSMUSG00000018459	831.601	1396.28	567.72	788.047	535.84	1288.84	34.9779	66.0876	69.1704	157.82	47.6859	64.6129	901.389	73.3924	3.61678	1.03809e-24	3.87197e-23	Slc13a3	2	165405028	165473230	-	5215	protein_coding	solute carrier family 13 (sodium-dependent dicarboxylate transporter), member 3 [Source:MGI Symbol;Acc:MGI:2149635]	-
ENSMUSG00000023068	3094.65	2710.07	2335.39	2424.06	2032.71	2799.71	1155.98	1126.06	1128.14	1176.26	1121.97	1123.9	2566.1	1138.72	1.17256	1.10604e-24	4.11873e-23	Nus1	10	52417547	52440183	+	4867	protein_coding	NUS1 dehydrodolichyl diphosphate synthase subunit [Source:MGI Symbol;Acc:MGI:1196365]	-
ENSMUSG00000008348	8381.25	9006.42	10940.2	17326.6	13894.5	9028.74	2687.33	2063.31	2440.73	2142.62	2408.59	3478.17	11429.6	2536.79	2.17169	1.1556e-24	4.29634e-23	Ubc	5	125385965	125390202	-	2893	protein_coding	ubiquitin C [Source:MGI Symbol;Acc:MGI:98889]	-
ENSMUSG00000000244	6.8164	5.02983	7.74163	18.2358	8.70274	12.5241	58.8653	100.419	153.986	122.835	102.57	104.655	9.84175	107.222	-3.47047	1.17807e-24	4.37278e-23	Tspan32	7	143005046	143019644	+	6234	protein_coding	tetraspanin 32 [Source:MGI Symbol;Acc:MGI:1350360]	-
ENSMUSG00000005667	562.84	461.739	316.117	501.485	409.029	582.94	137.352	121.876	115.284	70.7468	127.762	113.755	472.358	114.463	2.04697	1.19503e-24	4.42855e-23	Mthfd2	6	83305691	83325908	-	3487	protein_coding	methylenetetrahydrofolate dehydrogenase (NAD+ dependent), methenyltetrahydrofolate cyclohydrolase [Source:MGI Symbol;Acc:MGI:1338850]	-
ENSMUSG00000008153	30.1869	19.1134	16.7735	24.7486	16.1622	14.8012	138.205	201.696	96.3445	104.954	186.245	191.108	20.2976	153.092	-2.90652	1.19834e-24	4.43368e-23	Clstn3	6	124430759	124464794	-	4968	protein_coding	calsyntenin 3 [Source:MGI Symbol;Acc:MGI:2178323]	-
ENSMUSG00000027078	4827.96	5050.96	3501.8	2525.66	3326.93	6519.37	578.415	611.096	1022.73	953.916	603.721	588.796	4292.11	726.446	2.56266	1.38349e-24	5.11046e-23	Ube2l6	2	84798828	84810335	+	1996	protein_coding	ubiquitin-conjugating enzyme E2L 6 [Source:MGI Symbol;Acc:MGI:1914500]	-
ENSMUSG00000030317	126.59	215.277	258.054	153.702	121.838	134.35	1097.11	1018.78	666.177	880.06	1329.81	1831	168.302	1137.16	-2.75671	1.44909e-24	5.34414e-23	Timp4	6	115241892	115252205	-	5894	protein_coding	tissue inhibitor of metalloproteinase 4 [Source:MGI Symbol;Acc:MGI:109125]	-
ENSMUSG00000003206	297.974	374.22	187.089	174.543	175.298	318.796	25.5936	30.0398	36.2321	57.5304	31.4907	40.0418	254.653	36.8214	2.78944	1.54323e-24	5.6822e-23	Ebi3	17	55952640	55957022	+	1154	protein_coding	Epstein-Barr virus induced gene 3 [Source:MGI Symbol;Acc:MGI:1354171]	-
ENSMUSG00000040463	4608.86	4206.95	3005.04	3096.18	3344.34	4640.75	1441.77	1356.08	1409.76	1452.25	1241.63	1196.7	3817.02	1349.7	1.49996	1.55436e-24	5.70876e-23	Mybbp1a	11	72441355	72451768	+	5803	protein_coding	MYB binding protein (P160) 1a [Source:MGI Symbol;Acc:MGI:106181]	-
ENSMUSG00000040010	1010.77	872.173	410.307	604.387	525.894	1581.45	58.0122	86.6863	108.696	125.167	74.6778	81.9036	834.165	89.1906	3.22488	1.55542e-24	5.70876e-23	Slc7a5	8	121881150	121907694	-	3708	protein_coding	solute carrier family 7 (cationic amino acid transporter, y+ system), member 5 [Source:MGI Symbol;Acc:MGI:1298205]	-
ENSMUSG00000021943	65.2427	139.829	50.3206	36.4716	21.1352	74.0061	567.325	830.815	1068.02	995.12	571.331	733.492	64.5009	794.351	-3.61596	1.75939e-24	6.44706e-23	Gdf10	14	33923587	33937983	+	5210	protein_coding	growth differentiation factor 10 [Source:MGI Symbol;Acc:MGI:95684]	-
ENSMUSG00000061762	220.072	258.533	201.282	179.753	145.46	424.681	5.11872	16.3073	28.821	28.7652	10.7968	15.4707	238.297	17.5466	3.75824	1.79544e-24	6.56869e-23	Tac1	6	7554879	7565834	+	3399	protein_coding	tachykinin 1 [Source:MGI Symbol;Acc:MGI:98474]	-
ENSMUSG00000026473	43054.3	42009.2	51701.2	51251.7	53690.9	36631.9	10579.5	14608.8	12574.2	15783.5	16797.1	18298.2	46389.9	14773.6	1.65079	1.82388e-24	6.66208e-23	Glul	1	153899944	153909723	+	3323	protein_coding	glutamate-ammonia ligase (glutamine synthetase) [Source:MGI Symbol;Acc:MGI:95739]	-
ENSMUSG00000028874	300.895	341.023	216.766	212.317	154.163	208.356	27.2998	35.1895	59.2889	34.9847	48.5856	28.2112	238.92	38.9266	2.61893	2.02809e-24	7.39625e-23	Fgr	4	132974095	133001910	+	3863	protein_coding	FGR proto-oncogene, Src family tyrosine kinase [Source:MGI Symbol;Acc:MGI:95527]	-
ENSMUSG00000025044	1495.71	1925.42	1091.57	862.293	719.841	1687.34	139.912	213.712	285.74	184.253	134.96	185.648	1297.03	190.704	2.76587	2.37486e-24	8.63343e-23	Msr1	8	39581685	39642673	-	6344	protein_coding	macrophage scavenger receptor 1 [Source:MGI Symbol;Acc:MGI:98257]	-
ENSMUSG00000023909	72.0591	57.3401	41.2887	39.0767	89.5139	48.9579	223.517	274.65	256.919	335.853	243.828	243.891	58.0394	263.11	-2.17661	2.38227e-24	8.64666e-23	Paqr4	17	23736186	23740867	-	2644	protein_coding	progestin and adipoQ receptor family member IV [Source:MGI Symbol;Acc:MGI:1923748]	-
ENSMUSG00000096957	61.3476	102.609	56.772	87.2714	67.1354	75.1447	11.9437	6.00796	3.29383	3.10975	1.79947	9.1004	75.0466	5.87585	3.684	2.74588e-24	9.95067e-23	E230013L22Rik	8	11477929	11480241	+	1856	bidirectional_promoter_lncRNA	RIKEN cDNA E230013L22 gene [Source:MGI Symbol;Acc:MGI:2142601]	-
ENSMUSG00000009471	111.984	90.537	152.252	128.953	128.055	54.6507	679.937	641.135	566.538	387.941	800.762	590.616	111.072	611.155	-2.46279	2.7913e-24	1.00921e-22	Myod1	7	46376474	46379099	+	1861	protein_coding	myogenic differentiation 1 [Source:MGI Symbol;Acc:MGI:97275]	bHLH
ENSMUSG00000108414	1265.9	1049.22	1719.93	1819.67	1560.28	1885.45	415.47	466.046	401.847	354.512	502.951	540.564	1550.08	446.898	1.79434	2.79371e-24	1.00921e-22	Snhg1	19	8723475	8726443	+	2969	processed_transcript	small nucleolar RNA host gene 1 [Source:MGI Symbol;Acc:MGI:3763743]	-
ENSMUSG00000090222	467.41	658.908	415.468	240.973	356.812	581.802	51.1872	20.5987	11.5284	16.3262	52.1845	48.2321	453.562	33.3429	3.77006	3.43784e-24	1.23995e-22	Ifi203-ps	1	173776529	173798270	-	2556	unprocessed_pseudogene	interferon activated gene 203, pseudogene [Source:MGI Symbol;Acc:MGI:3840117]	-
ENSMUSG00000031167	5677.09	6199.77	6210.08	5667.43	5645.59	8331.95	2297.45	2640.07	2665.53	2583.43	1996.51	2577.23	6288.65	2460.04	1.35404	3.65418e-24	1.31591e-22	Rbm3	X	8138975	8145880	-	4698	protein_coding	RNA binding motif (RNP1, RRM) protein 3 [Source:MGI Symbol;Acc:MGI:1099460]	-
ENSMUSG00000050896	898.791	725.302	473.53	395.978	365.515	951.832	27.2998	69.5207	61.7593	61.4176	17.0949	18.2008	635.158	42.5489	3.89771	3.67133e-24	1.32001e-22	Rtn4rl2	2	84871924	84886710	-	1506	protein_coding	reticulon 4 receptor-like 2 [Source:MGI Symbol;Acc:MGI:2669796]	-
ENSMUSG00000087684	118.8	109.65	132.898	63.8253	84.5409	76.2832	0	0	0	6.2195	0	0	97.6663	1.03658	6.45502	4.16491e-24	1.49513e-22	1200007C13Rik	2	167827693	167833646	-	2455	lincRNA	RIKEN cDNA 1200007C13 gene [Source:MGI Symbol;Acc:MGI:1921369]	-
ENSMUSG00000038037	1724.55	1110.59	2206.37	1359.87	1338.98	2119.99	72.5152	63.5127	183.631	111.174	96.2714	303.953	1643.39	138.51	3.56912	5.01748e-24	1.79557e-22	Socs1	16	10782240	10785536	-	2908	protein_coding	suppressor of cytokine signaling 1 [Source:MGI Symbol;Acc:MGI:1354910]	-
ENSMUSG00000039384	178.2	286.7	207.734	216.225	227.514	182.169	2243.71	1761.19	1387.52	596.295	1522.35	1094.78	216.424	1434.31	-2.72821	5.13277e-24	1.83397e-22	Dusp10	1	184013302	184075636	+	3042	protein_coding	dual specificity phosphatase 10 [Source:MGI Symbol;Acc:MGI:1927070]	-
ENSMUSG00000061207	694.299	1274.56	1265.76	1051.16	1096.55	1404.98	322.479	296.965	382.907	318.749	360.793	361.286	1131.22	340.53	1.73187	5.16983e-24	1.84433e-22	Stk19	17	34823993	34836945	-	3155	protein_coding	serine/threonine kinase 19 [Source:MGI Symbol;Acc:MGI:1860085]	-
ENSMUSG00000024395	210.335	185.098	70.965	130.256	89.5139	175.338	786.577	879.737	801.224	1092.3	661.304	1082.95	143.584	884.015	-2.61811	5.31349e-24	1.89264e-22	Lims2	18	31931325	31958619	+	2623	protein_coding	LIM and senescent cell antigen like domains 2 [Source:MGI Symbol;Acc:MGI:2385067]	-
ENSMUSG00000096775	59.4001	39.2327	99.3509	78.1535	54.7029	60.3434	4.2656	4.2914	0	1.55488	5.3984	4.5502	65.1973	3.34341	4.30465	5.81152e-24	2.06683e-22	Gm5796	14	4023941	4041370	+	1817	protein_coding	predicted gene 5796 [Source:MGI Symbol;Acc:MGI:3779522]	-
ENSMUSG00000079003	115.879	88.5251	95.4801	175.845	118.109	76.2832	410.351	367.344	438.903	457.133	425.574	405.878	111.687	417.53	-1.90638	5.82718e-24	2.06919e-22	Samd1	8	83997672	84000409	+	2393	protein_coding	sterile alpha motif domain containing 1 [Source:MGI Symbol;Acc:MGI:2142433]	-
novel.97	64.2689	61.364	79.9969	61.2202	49.7299	74.0061	0	0	0	0	0	0	65.0977	0	8.69703	7.16409e-24	2.53999e-22	-	12	85524177	85525661	+	843	-	- && - && -	-
ENSMUSG00000026278	41.8722	61.364	37.4179	37.7742	44.7569	59.2049	156.974	175.947	247.037	223.902	160.152	194.749	47.065	193.127	-2.03095	7.27316e-24	2.57468e-22	Bok	1	93685660	93695764	+	1840	protein_coding	BCL2-related ovarian killer [Source:MGI Symbol;Acc:MGI:1858494]	-
ENSMUSG00000041360	1957.28	1762.45	1347.04	1385.92	1297.95	2328.35	452.154	455.747	528.659	570.639	437.27	361.286	1679.83	467.626	1.84485	7.42663e-24	2.62495e-22	Pum3	19	27388702	27429820	-	3462	protein_coding	pumilio RNA-binding family member 3 [Source:MGI Symbol;Acc:MGI:106253]	-
ENSMUSG00000016024	5874.76	6889.86	4145.64	4272.39	3412.72	6408.93	993.885	1205.03	1283.77	1419.6	697.293	949.172	5167.38	1091.46	2.24312	7.46172e-24	2.6333e-22	Lbp	2	158306493	158332852	+	4831	protein_coding	lipopolysaccharide binding protein [Source:MGI Symbol;Acc:MGI:1098776]	-
ENSMUSG00000020812	257.076	271.611	307.085	337.362	358.056	411.019	93.8432	86.6863	46.937	50.5335	71.0789	91.004	323.701	73.3472	2.14331	7.93809e-24	2.79711e-22	1810032O08Rik	11	116671660	116675799	+	2776	protein_coding	RIKEN cDNA 1810032O08 gene [Source:MGI Symbol;Acc:MGI:1913543]	-
ENSMUSG00000004105	1030.25	1335.92	975.446	943.052	692.489	758.278	2677.09	3063.2	3573.8	3447.16	2867.45	2903.03	955.906	3088.62	-1.69149	7.9655e-24	2.80246e-22	Angptl2	2	33216069	33247717	+	6286	protein_coding	angiopoietin-like 2 [Source:MGI Symbol;Acc:MGI:1347002]	-
ENSMUSG00000054723	40.8984	23.1372	49.0303	36.4716	47.2434	64.8977	234.608	223.153	343.382	429.146	231.231	212.949	43.6131	279.078	-2.68218	8.31283e-24	2.92019e-22	Vmac	17	56713936	56718022	-	2464	protein_coding	vimentin-type intermediate filament associated coiled-coil protein [Source:MGI Symbol;Acc:MGI:2146912]	-
ENSMUSG00000031824	4492.98	3981.62	2579.25	4346.64	3241.15	2963.66	517.844	479.779	825.927	911.935	335.6	383.127	3600.88	575.702	2.6446	8.4434e-24	2.96151e-22	6430548M08Rik	8	120114152	120165306	+	6626	protein_coding	RIKEN cDNA 6430548M08 gene [Source:MGI Symbol;Acc:MGI:2443793]	-
ENSMUSG00000031897	4568.94	5476.48	3798.56	2963.32	3236.18	6283.69	842.03	853.989	1278.83	1194.14	974.411	1022.89	4387.86	1027.71	2.09412	8.50034e-24	2.97693e-22	Psmb10	8	105935735	105938444	-	1705	protein_coding	proteasome (prosome, macropain) subunit, beta type 10 [Source:MGI Symbol;Acc:MGI:1096380]	-
ENSMUSG00000036693	794.598	766.546	731.584	704.684	724.814	872.133	370.254	401.675	382.907	419.039	329.302	377.667	765.727	380.141	1.01039	9.69492e-24	3.39012e-22	Nop14	5	34638536	34660148	-	2730	protein_coding	NOP14 nucleolar protein [Source:MGI Symbol;Acc:MGI:1922666]	-
novel.308	113.931	99.5907	81.2871	164.122	62.1624	30.741	1.70624	0.85828	2.47037	0.777438	0	1.82008	91.9725	1.27207	6.1713	1.17826e-23	4.11385e-22	-	3	21956156	21964217	-	1490	-	- && - && -	-
ENSMUSG00000113136	60.3738	39.2327	64.5136	71.6407	49.7299	78.5603	4.2656	0.85828	0	0	5.3984	2.73012	60.6752	2.20873	4.81827	1.23083e-23	4.29088e-22	Gm19951	12	99643093	99647221	+	1328	lincRNA	predicted gene, 19951 [Source:MGI Symbol;Acc:MGI:5012136]	-
ENSMUSG00000062061	97.3772	49.2924	72.2552	152.399	79.5679	71.729	4.2656	0	2.47037	0	0	0	87.1035	1.12266	6.26265	1.38164e-23	4.80934e-22	Obp2a	2	25700043	25703326	+	744	protein_coding	odorant binding protein 2A [Source:MGI Symbol;Acc:MGI:2387617]	-
ENSMUSG00000026589	38.9509	38.2267	21.9346	35.1691	8.70274	54.6507	228.636	278.083	232.215	191.25	252.825	285.753	32.9391	244.794	-2.88444	1.41228e-23	4.90852e-22	Sec16b	1	157506728	157568425	+	5410	protein_coding	SEC16 homolog B (S. cerevisiae) [Source:MGI Symbol;Acc:MGI:2148802]	-
ENSMUSG00000019970	11451.6	12986	16512.9	21229.1	20712.5	15165.6	5110.19	5522.18	4259.74	4631.2	3732.09	5035.25	16342.9	4715.11	1.79325	1.42082e-23	4.93073e-22	Sgk1	10	21882184	21999903	+	4903	protein_coding	serum/glucocorticoid regulated kinase 1 [Source:MGI Symbol;Acc:MGI:1340062]	-
ENSMUSG00000044258	1699.23	1728.25	2263.14	3738.34	2455.42	2428.54	399.26	282.374	378.79	324.969	637.011	543.294	2385.49	427.616	2.48006	1.51357e-23	5.24469e-22	Ctla2a	13	60934155	60936625	-	2108	protein_coding	cytotoxic T lymphocyte-associated protein 2 alpha [Source:MGI Symbol;Acc:MGI:88554]	-
ENSMUSG00000040364	51.6099	55.3282	56.772	39.0767	60.9192	34.1567	3.41248	1.71656	1.64691	3.10975	3.59893	6.37028	49.6438	3.30915	3.92316	1.56597e-23	5.41805e-22	Sec1	7	45677686	45694402	-	2470	protein_coding	secretory blood group 1 [Source:MGI Symbol;Acc:MGI:1928893]	-
ENSMUSG00000046470	49.6624	18.1074	16.7735	20.8409	18.6487	5.69278	292.62	272.075	199.277	193.582	469.661	344.905	21.621	295.353	-3.75948	1.77274e-23	6.12421e-22	Sox18	2	181669836	181671640	-	1620	protein_coding	SRY (sex determining region Y)-box 18 [Source:MGI Symbol;Acc:MGI:103559]	HMG
ENSMUSG00000016940	327.187	376.231	429.661	382.952	390.38	325.627	776.339	793.909	1034.26	1042.54	870.942	857.258	372.006	895.876	-1.26961	1.81816e-23	6.2717e-22	Kctd2	11	115420128	115431274	+	3009	protein_coding	potassium channel tetramerisation domain containing 2 [Source:MGI Symbol;Acc:MGI:1917632]	-
ENSMUSG00000004127	199.623	208.235	180.638	148.492	142.974	214.048	63.984	48.0637	62.5827	55.9755	58.4827	59.1526	182.335	58.0402	1.65486	1.93037e-23	6.64877e-22	Trmt10a	3	138143448	138159821	+	7976	protein_coding	tRNA methyltransferase 10A [Source:MGI Symbol;Acc:MGI:1920421]	-
ENSMUSG00000040296	3738.31	4367.91	2110.89	1242.64	1816.39	3780	290.914	295.248	384.554	507.667	212.337	298.493	2842.69	331.536	3.09985	2.09646e-23	7.20999e-22	Ddx58	4	40203773	40239828	-	7050	protein_coding	DEAD (Asp-Glu-Ala-Asp) box polypeptide 58 [Source:MGI Symbol;Acc:MGI:2442858]	-
ENSMUSG00000032198	113.931	98.5847	129.027	127.651	131.784	111.578	415.47	378.502	273.388	327.301	362.592	484.141	118.759	373.566	-1.65582	2.68483e-23	9.21965e-22	Dock6	9	21799860	21852635	-	8782	protein_coding	dedicator of cytokinesis 6 [Source:MGI Symbol;Acc:MGI:1914789]	-
ENSMUSG00000044712	36.0295	29.173	30.9665	26.0512	28.5947	43.2651	123.702	115.01	124.342	110.396	170.05	127.406	32.3467	128.484	-1.98317	2.84626e-23	9.75941e-22	Slc38a6	12	73286779	73354049	+	7783	protein_coding	solute carrier family 38, member 6 [Source:MGI Symbol;Acc:MGI:3648156]	-
ENSMUSG00000024206	38.9509	29.173	27.0957	22.1435	39.784	40.988	193.658	170.798	359.851	387.164	189.844	165.627	33.0225	244.49	-2.88523	2.94345e-23	1.00776e-21	Rfx2	17	56775897	56831013	-	7311	protein_coding	regulatory factor X, 2 (influences HLA class II expression) [Source:MGI Symbol;Acc:MGI:106583]	RFX
ENSMUSG00000026580	2820.04	2822.74	469.659	337.362	523.408	695.657	51.1872	51.4968	24.7037	30.3201	13.496	14.5606	1278.15	30.9607	5.36695	3.13306e-23	1.07108e-21	Selp	1	164115264	164150026	+	4413	protein_coding	selectin, platelet [Source:MGI Symbol;Acc:MGI:98280]	-
ENSMUSG00000024169	31.1607	46.2745	39.9984	29.9588	28.5947	44.4037	144.177	172.514	215.746	257.332	131.361	163.807	36.7318	180.823	-2.29716	3.15505e-23	1.07699e-21	Ift140	17	25016085	25099495	+	8333	protein_coding	intraflagellar transport 140 [Source:MGI Symbol;Acc:MGI:2146906]	-
ENSMUSG00000020057	2647.68	3251.28	2380.55	1771.48	1623.68	2861.19	733.683	739.838	734.524	759.557	668.502	688.9	2422.65	720.834	1.74908	3.40707e-23	1.16129e-21	Dram1	10	88322804	88379080	-	3045	protein_coding	DNA-damage regulated autophagy modulator 1 [Source:MGI Symbol;Acc:MGI:1918962]	-
ENSMUSG00000030669	36.0295	68.4057	83.8677	78.1535	43.5137	92.223	2.55936	3.43312	6.58766	6.99694	2.6992	4.5502	67.0322	4.47108	3.89006	3.59164e-23	1.22238e-21	Calca	7	114631478	114636357	-	1684	protein_coding	calcitonin/calcitonin-related polypeptide, alpha [Source:MGI Symbol;Acc:MGI:2151253]	-
ENSMUSG00000033294	922.162	669.974	1052.86	1056.37	1046.82	1203.45	366.842	288.382	317.031	231.676	341.899	334.895	991.94	313.454	1.66201	3.70339e-23	1.25855e-21	Noc4l	5	110648418	110653417	-	2596	protein_coding	NOC4 like [Source:MGI Symbol;Acc:MGI:2140843]	-
ENSMUSG00000026594	39.9246	46.2745	19.3541	32.5639	26.1082	45.5422	143.324	189.68	196.806	217.683	136.759	152.887	34.9613	172.857	-2.2938	3.78134e-23	1.28314e-21	Ralgps2	1	156804166	156939626	-	12085	protein_coding	Ral GEF with PH domain and SH3 binding motif 2 [Source:MGI Symbol;Acc:MGI:1925505]	-
ENSMUSG00000052749	205.466	312.856	139.349	74.2458	146.703	245.928	5.97184	16.3073	21.4099	7.77438	4.49867	13.6506	187.425	11.6021	4.01431	3.9183e-23	1.32765e-21	Trim30b	7	104355382	104369884	-	7527	protein_coding	tripartite motif-containing 30B [Source:MGI Symbol;Acc:MGI:4821256]	-
ENSMUSG00000075273	69.1378	56.3341	46.4498	65.1279	65.8922	50.0964	182.568	151.057	206.688	212.241	164.651	191.108	58.8397	184.719	-1.64894	4.15086e-23	1.40438e-21	Ttc30b	2	75935849	75938585	-	2737	protein_coding	tetratricopeptide repeat domain 30B [Source:MGI Symbol;Acc:MGI:1919671]	-
ENSMUSG00000079036	395.351	464.757	441.273	420.726	453.786	553.338	191.952	186.247	190.219	150.823	205.139	206.579	454.872	188.493	1.27216	4.45027e-23	1.50346e-21	Alkbh1	12	87425840	87444017	-	6574	protein_coding	alkB homolog 1, histone H2A dioxygenase [Source:MGI Symbol;Acc:MGI:2384034]	-
ENSMUSG00000050141	81.7968	114.68	61.9331	37.7742	67.1354	95.6387	9.38432	3.43312	0.823457	3.10975	1.79947	3.64016	76.4931	3.69838	4.37597	4.67672e-23	1.57764e-21	Fam205c	4	42868004	42874234	-	1871	protein_coding	family with sequence similarity 205, member C [Source:MGI Symbol;Acc:MGI:2679716]	-
ENSMUSG00000026825	103.22	241.432	61.9331	112.02	70.8652	154.844	795.108	908.919	960.151	914.267	730.583	936.431	124.052	874.243	-2.81336	4.82285e-23	1.62454e-21	Dnm1	2	32308471	32353338	-	5249	protein_coding	dynamin 1 [Source:MGI Symbol;Acc:MGI:107384]	-
ENSMUSG00000001056	2107.24	2091.4	2607.64	3029.75	2348.5	3165.18	932.46	870.296	1050.73	729.237	969.912	987.394	2558.29	923.338	1.47016	5.36229e-23	1.8036e-21	Nhp2	11	51619735	51623714	+	1146	protein_coding	NHP2 ribonucleoprotein [Source:MGI Symbol;Acc:MGI:1098547]	-
ENSMUSG00000053560	925.083	964.722	1068.35	1151.46	1072.92	1134	508.46	450.597	499.838	404.268	556.935	512.353	1052.76	488.742	1.10694	5.57135e-23	1.87117e-21	Ier2	8	84661331	84662852	-	1522	protein_coding	immediate early response 2 [Source:MGI Symbol;Acc:MGI:104815]	-
ENSMUSG00000024222	8261.48	6865.72	5672.04	5690.88	6620.3	6933.8	1184.13	1502.85	1725.97	2398.4	926.725	1193.06	6674.04	1488.52	2.16454	5.75581e-23	1.9303e-21	Fkbp5	17	28399094	28517527	-	9468	protein_coding	FK506 binding protein 5 [Source:MGI Symbol;Acc:MGI:104670]	-
ENSMUSG00000079355	37.9771	36.2148	6.45136	10.4205	18.6487	28.4639	168.918	377.643	488.31	352.179	265.421	216.59	23.0294	311.51	-3.74	5.90556e-23	1.97763e-21	Ackr4	9	104084157	104126933	-	5380	protein_coding	atypical chemokine receptor 4 [Source:MGI Symbol;Acc:MGI:2181676]	-
ENSMUSG00000096727	1858.93	1780.56	1808.96	1120.2	1191.03	2364.78	354.045	386.226	520.425	454.801	330.202	458.66	1687.41	417.393	2.01539	6.86838e-23	2.29336e-21	Psmb9	17	34181988	34187764	-	3659	protein_coding	proteasome (prosome, macropain) subunit, beta type 9 (large multifunctional peptidase 2) [Source:MGI Symbol;Acc:MGI:1346526]	-
ENSMUSG00000103588	91.5345	97.5788	49.0303	45.5895	41.0272	97.9158	1.70624	2.57484	0	2.33231	0	0.91004	70.446	1.25391	5.79568	7.03671e-23	2.34615e-21	Gm18445	1	173986926	174001972	-	774	unprocessed_pseudogene	predicted gene, 18445 [Source:MGI Symbol;Acc:MGI:5010630]	-
ENSMUSG00000027555	2181.25	2434.44	1181.89	802.376	988.383	2387.55	117.731	122.734	223.157	195.914	56.6832	70.9831	1662.65	131.2	3.66284	7.57614e-23	2.52234e-21	Car13	3	14641727	14663002	+	2299	protein_coding	carbonic anhydrase 13 [Source:MGI Symbol;Acc:MGI:1931322]	-
ENSMUSG00000044162	464.489	623.699	347.083	123.743	266.055	481.609	10.2374	18.8822	50.2309	24.1006	20.6939	32.7614	384.446	26.1511	3.87796	7.77812e-23	2.58583e-21	Tnip3	6	65525313	65634040	+	10916	protein_coding	TNFAIP3 interacting protein 3 [Source:MGI Symbol;Acc:MGI:3041165]	-
ENSMUSG00000040283	19.4754	24.1432	12.9027	6.51279	18.6487	14.8012	195.365	185.389	79.8753	155.488	101.67	220.23	16.0807	156.336	-3.26462	8.43125e-23	2.79891e-21	Btnl9	11	49165585	49187159	-	6054	protein_coding	butyrophilin-like 9 [Source:MGI Symbol;Acc:MGI:2442439]	-
ENSMUSG00000015937	2753.83	2884.11	3246.32	2852.6	2823.42	3687.78	1184.98	1119.2	1372.7	1114.07	1516.95	1415.11	3041.34	1287.17	1.24063	8.51622e-23	2.82303e-21	H2afy	13	56073619	56136361	-	6809	protein_coding	H2A histone family, member Y [Source:MGI Symbol;Acc:MGI:1349392]	-
ENSMUSG00000057706	4.86886	13.0776	1.29027	7.81535	3.72975	4.55422	64.8371	67.8041	55.9951	59.0853	80.0762	57.3325	5.88933	64.1884	-3.40893	8.56192e-23	2.83408e-21	Mex3b	7	82867333	82871515	+	3355	protein_coding	mex3 RNA binding family member B [Source:MGI Symbol;Acc:MGI:1918252]	-
ENSMUSG00000026180	94.4558	202.199	47.7401	59.9177	68.3787	69.4519	2.55936	1.71656	0.823457	0.777438	0	0.91004	90.3572	1.13114	6.31943	8.87146e-23	2.93231e-21	Cxcr2	1	74153989	74161246	+	3048	protein_coding	chemokine (C-X-C motif) receptor 2 [Source:MGI Symbol;Acc:MGI:105303]	-
ENSMUSG00000026819	5642.03	4130.5	8048.72	10295.4	4990.4	3236.91	863.358	1284.85	694.998	985.791	1070.68	772.624	6057.33	945.383	2.67964	9.49071e-23	3.13248e-21	Slc25a25	2	32414487	32451445	-	7862	protein_coding	solute carrier family 25 (mitochondrial carrier, phosphate carrier), member 25 [Source:MGI Symbol;Acc:MGI:1915913]	-
ENSMUSG00000053801	990.326	949.632	1067.06	961.288	1143.79	1426.61	327.598	347.604	382.907	301.646	471.46	427.719	1089.78	376.489	1.53387	9.6578e-23	3.18305e-21	Grwd1	7	45825223	45830944	-	2057	protein_coding	glutamate-rich WD repeat containing 1 [Source:MGI Symbol;Acc:MGI:2141989]	-
ENSMUSG00000009418	166.515	155.925	58.0622	65.1279	60.9192	94.5001	664.581	697.782	534.424	715.243	592.024	874.549	100.175	679.767	-2.75552	9.8038e-23	3.22653e-21	Nav1	1	135434580	135607295	-	17303	protein_coding	neuron navigator 1 [Source:MGI Symbol;Acc:MGI:2183683]	-
ENSMUSG00000030147	15.5803	11.0656	15.4833	10.4205	7.45949	19.3554	70.809	100.419	74.1111	80.0761	72.8784	116.485	13.2274	85.7964	-2.68896	1.03338e-22	3.3961e-21	Clec4b1	6	123049962	123071555	+	784	protein_coding	C-type lectin domain family 4, member b1 [Source:MGI Symbol;Acc:MGI:1917060]	-
ENSMUSG00000065734	21.423	62.3699	112.254	96.3893	119.352	87.6688	1.70624	3.43312	0.823457	3.88719	1.79947	0.91004	83.2427	2.09325	5.29444	1.13462e-22	3.72346e-21	Snord49a	11	62603450	62603521	+	72	snoRNA	small nucleolar RNA, C/D box 49A [Source:MGI Symbol;Acc:MGI:3819538]	-
ENSMUSG00000009633	231.758	205.217	394.823	377.742	343.137	192.416	1337.69	1314.89	1185.78	1472.47	2602.03	1919.27	290.849	1638.69	-2.49581	1.16319e-22	3.81177e-21	G0s2	1	193272161	193273217	-	871	protein_coding	G0/G1 switch gene 2 [Source:MGI Symbol;Acc:MGI:1316737]	-
ENSMUSG00000085385	350.558	470.792	332.89	343.875	375.461	553.338	103.228	86.6863	102.109	104.177	142.158	138.326	404.486	112.781	1.84457	1.17151e-22	3.83355e-21	Snhg17	2	158353700	158361580	-	7052	processed_transcript	small nucleolar RNA host gene 17 [Source:MGI Symbol;Acc:MGI:1915358]	-
ENSMUSG00000024498	1375.94	1276.57	1024.48	1045.95	1127.63	1471.01	593.772	514.968	516.308	520.106	539.84	532.374	1220.26	536.228	1.18712	1.21415e-22	3.96743e-21	Tcerg1	18	42511510	42575551	+	4246	protein_coding	transcription elongation regulator 1 (CA150) [Source:MGI Symbol;Acc:MGI:1926421]	-
ENSMUSG00000056204	219.099	185.098	260.635	259.209	287.19	220.88	598.89	617.962	561.598	623.505	607.32	495.062	238.685	584.056	-1.29468	1.29729e-22	4.23308e-21	Pgpep1	8	70646435	70660388	-	5319	protein_coding	pyroglutamyl-peptidase I [Source:MGI Symbol;Acc:MGI:1913772]	-
ENSMUSG00000103292	105.167	73.4356	63.2233	54.7074	44.7569	75.1447	10.2374	9.44108	4.11728	9.32925	8.99733	6.37028	69.4059	8.08211	3.10789	1.32436e-22	4.31526e-21	Gm35048	1	90520496	90523297	+	2802	TEC	predicted gene, 35048 [Source:MGI Symbol;Acc:MGI:5594207]	-
ENSMUSG00000028367	9662.74	9952.03	11260.2	9545.14	8613.23	14144.3	3310.11	3672.58	3952.59	3355.42	4329.52	4515.62	10529.6	3855.97	1.44933	1.45263e-22	4.72652e-21	Txn1	4	57943373	57956411	-	1051	protein_coding	thioredoxin 1 [Source:MGI Symbol;Acc:MGI:98874]	-
ENSMUSG00000048776	15.5803	7.04177	6.45136	20.8409	11.1892	11.3856	65.6903	84.9697	83.9926	65.3048	80.0762	73.7133	12.0815	75.6245	-2.65155	1.4904e-22	4.84255e-21	Pthlh	6	147252101	147264183	-	1619	protein_coding	parathyroid hormone-like peptide [Source:MGI Symbol;Acc:MGI:97800]	-
ENSMUSG00000020728	41.8722	38.2267	39.9984	46.8921	41.0272	33.0181	117.731	132.175	153.163	164.817	134.96	111.935	40.1725	135.797	-1.76145	1.50775e-22	4.89197e-21	Cep112	11	108425192	108860615	+	6175	protein_coding	centrosomal protein 112 [Source:MGI Symbol;Acc:MGI:1923673]	-
ENSMUSG00000024087	1098.41	1514.99	842.548	946.96	995.842	1085.04	47.7747	89.2611	251.978	76.9663	74.6778	57.3325	1080.63	99.6651	3.43794	1.64284e-22	5.32276e-21	Cyp1b1	17	79706953	79715041	-	5128	protein_coding	cytochrome P450, family 1, subfamily b, polypeptide 1 [Source:MGI Symbol;Acc:MGI:88590]	-
ENSMUSG00000025172	9967.53	10362.5	18546.4	22120	18921	7343.68	2297.45	1284.85	1391.64	1201.14	2639.82	2319.69	14543.5	1855.77	2.97032	1.79842e-22	5.81861e-21	Ankrd2	19	42036038	42045110	+	1100	protein_coding	ankyrin repeat domain 2 (stretch responsive muscle) [Source:MGI Symbol;Acc:MGI:1861447]	-
ENSMUSG00000020175	4.86886	5.02983	7.74163	0	4.97299	9.10844	59.7184	49.7803	115.284	100.289	70.1792	71.8932	5.28696	77.8574	-3.87187	1.88931e-22	6.10405e-21	Rab36	10	75037058	75054748	+	6175	protein_coding	RAB36, member RAS oncogene family [Source:MGI Symbol;Acc:MGI:1924127]	-
novel.508	58.4263	89.531	89.0288	71.6407	73.3517	88.8073	11.9437	6.00796	10.7049	10.1067	18.8944	18.2008	78.4643	12.6431	2.64211	1.91087e-22	6.16505e-21	-	X	19145361	19146278	-	796	-	- && - && -	-
ENSMUSG00000039031	141.197	102.609	67.0941	80.7586	55.9462	168.506	855.68	909.777	1963.94	2440.38	793.565	644.308	102.685	1267.94	-3.62407	1.92739e-22	6.20962e-21	Arhgap18	10	26753421	26918648	+	6602	protein_coding	Rho GTPase activating protein 18 [Source:MGI Symbol;Acc:MGI:1921160]	-
ENSMUSG00000026946	2642.82	3050.09	1887.67	1051.16	1338.98	3283.59	295.18	295.248	394.436	441.585	245.627	330.345	2209.05	333.737	2.7266	2.06063e-22	6.62958e-21	Nmi	2	51948487	51973494	-	2001	protein_coding	N-myc (and STAT) interactor [Source:MGI Symbol;Acc:MGI:1928368]	-
ENSMUSG00000026259	5.84263	4.02387	7.74163	6.51279	4.97299	3.41567	39.2435	55.7882	70.8173	68.4145	62.9813	50.9622	5.41826	58.0345	-3.43917	2.20367e-22	7.07983e-21	Ngef	1	87476834	87573870	-	3905	protein_coding	neuronal guanine nucleotide exchange factor [Source:MGI Symbol;Acc:MGI:1858414]	-
ENSMUSG00000043448	2.92131	0	2.58054	2.60512	0	4.55422	58.0122	47.2054	107.873	75.4115	73.7781	56.4225	2.1102	69.7838	-5.05584	2.29558e-22	7.36481e-21	Gjc2	11	59175568	59183213	-	2250	protein_coding	gap junction protein, gamma 2 [Source:MGI Symbol;Acc:MGI:2153060]	-
ENSMUSG00000037306	140.223	138.823	72.2552	66.4304	47.2434	85.3917	461.538	670.317	713.937	771.996	439.969	487.782	91.7279	590.923	-2.68129	2.31023e-22	7.39742e-21	Man1c1	4	134561690	134704290	-	5722	protein_coding	mannosidase, alpha, class 1C, member 1 [Source:MGI Symbol;Acc:MGI:2446214]	-
ENSMUSG00000060548	56.4788	79.4714	58.0622	83.3637	79.5679	47.8193	619.365	413.691	216.569	293.094	433.671	350.365	67.4605	387.793	-2.52429	2.3122e-22	7.39742e-21	Tnfrsf19	14	60963875	61046490	-	4738	protein_coding	tumor necrosis factor receptor superfamily, member 19 [Source:MGI Symbol;Acc:MGI:1352474]	-
ENSMUSG00000027160	61.3476	42.2506	50.3206	59.9177	43.5137	77.4218	179.155	158.782	175.396	192.027	175.448	206.579	55.7953	181.231	-1.69882	2.41525e-22	7.70563e-21	Ccdc34	2	110017817	110173360	+	6558	protein_coding	coiled-coil domain containing 34 [Source:MGI Symbol;Acc:MGI:1915451]	-
ENSMUSG00000050244	1224.03	1019.04	763.841	702.079	814.328	1365.13	273.852	271.217	279.152	328.856	249.226	226.6	981.408	271.484	1.85417	2.43295e-22	7.74152e-21	Heatr1	13	12395027	12440289	+	7828	protein_coding	HEAT repeat containing 1 [Source:MGI Symbol;Acc:MGI:2442524]	-
ENSMUSG00000064043	33.1082	35.2088	37.4179	27.3537	19.892	44.4037	145.03	193.113	315.384	359.954	146.656	228.42	32.8974	231.426	-2.81211	2.43325e-22	7.74152e-21	Trerf1	17	47140875	47361958	+	9070	processed_transcript	transcriptional regulating factor 1 [Source:MGI Symbol;Acc:MGI:2442086]	zf-C2H2
ENSMUSG00000044703	369.059	661.926	268.377	52.1023	167.839	481.609	7.67808	18.8822	18.1161	17.1036	14.3957	12.7406	333.485	14.8194	4.49174	2.71296e-22	8.61948e-21	Phf11a	14	59276913	59297522	-	1354	protein_coding	PHD finger protein 11A [Source:MGI Symbol;Acc:MGI:1918441]	-
ENSMUSG00000027360	1384.7	1569.31	1197.37	858.386	995.842	1130.59	37.5373	44.6306	214.922	84.7407	30.5909	51.8723	1189.37	77.3823	3.94076	2.7518e-22	8.73079e-21	Hdc	2	126593667	126619299	-	6389	protein_coding	histidine decarboxylase [Source:MGI Symbol;Acc:MGI:96062]	-
ENSMUSG00000023147	89.587	110.656	99.3509	114.625	142.974	120.687	258.495	274.65	339.264	332.743	324.804	299.403	112.98	304.893	-1.43555	2.77837e-22	8.80289e-21	Wrb	16	96145407	96157852	+	4368	protein_coding	tryptophan rich basic protein [Source:MGI Symbol;Acc:MGI:2136882]	-
ENSMUSG00000087477	60.3738	56.3341	49.0303	37.7742	44.7569	88.8073	1.70624	6.86624	1.64691	0.777438	1.79947	3.64016	56.1795	2.73941	4.37743	2.89541e-22	9.16107e-21	Gm13822	5	114917318	114923277	-	346	antisense	predicted gene 13822 [Source:MGI Symbol;Acc:MGI:3650351]	-
ENSMUSG00000050737	2245.52	2569.24	2092.82	1448.44	1311.63	2551.5	520.403	545.008	673.588	431.478	405.78	441.369	2036.53	502.938	2.0178	2.90497e-22	9.17867e-21	Ptges	2	30889471	30929863	-	3931	protein_coding	prostaglandin E synthase [Source:MGI Symbol;Acc:MGI:1927593]	-
ENSMUSG00000036555	41.8722	36.2148	24.5152	23.446	31.0812	52.3736	133.087	148.482	238.803	238.673	160.152	202.029	34.9172	186.871	-2.41089	2.97874e-22	9.39879e-21	Iqce	5	140661827	140702378	-	12037	protein_coding	IQ motif containing E [Source:MGI Symbol;Acc:MGI:1921489]	-
ENSMUSG00000054619	720.591	681.039	695.457	397.28	624.111	448.591	1838.47	2275.3	2368.26	2997.02	1713.99	2123.12	594.511	2219.36	-1.89989	3.05645e-22	9.63075e-21	Mettl7a1	15	100304140	100328662	+	2595	protein_coding	methyltransferase like 7A1 [Source:MGI Symbol;Acc:MGI:1916523]	-
ENSMUSG00000070427	801.414	800.749	504.496	428.542	415.245	907.429	91.2839	79.8201	154.81	133.719	72.8784	71.8932	642.979	100.734	2.67341	3.08284e-22	9.70059e-21	Il18bp	7	102014885	102018690	-	3026	protein_coding	interleukin 18 binding protein [Source:MGI Symbol;Acc:MGI:1333800]	-
ENSMUSG00000035049	1537.59	1524.04	1181.89	1560.46	1261.9	1307.06	672.259	497.803	387.848	416.707	522.745	473.221	1395.49	495.097	1.49547	3.14087e-22	9.86963e-21	Rrp12	19	41862852	41896153	-	4319	protein_coding	ribosomal RNA processing 12 homolog (S. cerevisiae) [Source:MGI Symbol;Acc:MGI:2147437]	-
ENSMUSG00000034522	142.171	82.4893	91.6093	121.138	77.0814	70.5904	389.023	417.982	617.593	645.273	408.479	340.355	97.5132	469.784	-2.26733	3.84527e-22	1.20666e-20	Zfp395	14	65358389	65398930	+	4733	protein_coding	zinc finger protein 395 [Source:MGI Symbol;Acc:MGI:2682318]	-
ENSMUSG00000055602	110.036	84.5012	64.5136	49.4972	42.2704	118.41	0	5.14968	4.94074	0.777438	0	2.73012	78.2047	2.26633	5.10985	5.24573e-22	1.64388e-20	Tcp10b	17	13061104	13082481	+	3369	protein_coding	t-complex protein 10b [Source:MGI Symbol;Acc:MGI:98542]	-
ENSMUSG00000016552	44.7935	20.1193	20.6444	15.6307	31.0812	34.1567	140.765	182.814	228.921	256.554	120.564	183.828	27.7376	185.574	-2.73235	5.2996e-22	1.65849e-20	Foxred2	15	77940522	77956722	-	5939	protein_coding	FAD-dependent oxidoreductase domain containing 2 [Source:MGI Symbol;Acc:MGI:106315]	-
ENSMUSG00000017417	6.8164	6.0358	0	5.21023	4.97299	6.83133	107.493	42.914	60.1124	62.195	71.9786	82.8137	4.97779	71.2511	-3.80587	5.42775e-22	1.69628e-20	Plxdc1	11	97923238	97986444	-	4836	protein_coding	plexin domain containing 1 [Source:MGI Symbol;Acc:MGI:1919574]	-
ENSMUSG00000032860	2641.84	3032.99	2836.02	2114.05	2549.9	1749.96	944.404	662.592	574.773	496.005	798.063	721.662	2487.46	699.583	1.83041	6.00574e-22	1.87436e-20	P2ry2	7	100996568	101012866	-	3927	protein_coding	purinergic receptor P2Y, G-protein coupled 2 [Source:MGI Symbol;Acc:MGI:105107]	-
novel.262	111.01	102.609	60.6428	42.9844	50.9732	121.825	0	1.71656	0	4.66463	0.899733	5.46024	81.6741	2.12353	5.26718	6.05196e-22	1.88622e-20	-	19	11363895	11372986	-	1357	-	- && - && -	-
ENSMUSG00000021013	61.3476	58.3461	39.9984	33.8665	24.865	44.4037	192.805	199.979	230.568	261.997	158.353	176.548	43.8045	203.375	-2.20271	6.1992e-22	1.92949e-20	Ttc8	12	98920574	98983238	+	3782	protein_coding	tetratricopeptide repeat domain 8 [Source:MGI Symbol;Acc:MGI:1923510]	-
ENSMUSG00000061024	1875.48	1813.76	1917.34	1832.7	1975.52	2845.25	695.293	784.468	872.041	721.462	894.335	770.804	2043.34	789.734	1.37158	7.09326e-22	2.20477e-20	Rrs1	1	9545408	9547455	+	2048	protein_coding	ribosome biogenesis regulator 1 [Source:MGI Symbol;Acc:MGI:1929721]	-
ENSMUSG00000020186	132.433	159.949	98.0607	151.097	52.2164	170.783	917.104	959.557	3009.74	2606.75	950.118	940.072	127.423	1563.89	-3.61657	7.56907e-22	2.34631e-20	Csrp2	10	110919789	110939622	+	2171	protein_coding	cysteine and glycine-rich protein 2 [Source:MGI Symbol;Acc:MGI:1202907]	-
ENSMUSG00000034744	209.361	215.277	245.152	181.056	171.568	220.88	465.804	467.763	538.541	587.743	451.666	459.57	207.216	495.181	-1.25658	7.67145e-22	2.37484e-20	Nagk	6	83794982	83804018	+	4676	protein_coding	N-acetylglucosamine kinase [Source:MGI Symbol;Acc:MGI:1860418]	-
ENSMUSG00000039167	118.8	95.5668	101.931	113.323	44.7569	70.5904	717.474	581.914	288.21	433.81	637.911	647.039	90.8281	551.06	-2.59953	7.71052e-22	2.38371e-20	Adgrl4	3	151437887	151545086	+	4585	protein_coding	adhesion G protein-coupled receptor L4 [Source:MGI Symbol;Acc:MGI:2655562]	-
ENSMUSG00000020167	378.797	276.641	290.311	338.665	289.677	346.121	724.299	690.057	937.917	932.925	707.19	807.206	320.035	799.933	-1.32121	7.72428e-22	2.38475e-20	Tcf3	10	80409514	80433647	-	4039	protein_coding	transcription factor 3 [Source:MGI Symbol;Acc:MGI:98510]	bHLH
ENSMUSG00000020263	258.049	259.539	305.794	321.732	324.488	233.404	569.884	667.742	668.647	778.993	744.079	817.216	283.834	707.76	-1.32037	7.79078e-22	2.40205e-20	Appl2	10	83600033	83648738	-	5949	protein_coding	adaptor protein, phosphotyrosine interaction, PH domain and leucine zipper containing 2 [Source:MGI Symbol;Acc:MGI:2384914]	-
ENSMUSG00000086841	2347.76	2503.85	4491.44	5578.86	4243.21	3317.75	944.404	1029.08	862.983	854.404	814.258	961.912	3747.14	911.173	2.03979	8.27335e-22	2.54742e-20	2410006H16Rik	11	62602877	62604807	+	462	processed_transcript	RIKEN cDNA 2410006H16 gene [Source:MGI Symbol;Acc:MGI:1916471]	-
ENSMUSG00000017897	15.5803	7.04177	6.45136	11.723	13.6757	13.6627	66.5434	89.2611	135.047	132.942	62.0816	105.565	11.3558	98.5733	-3.11372	8.46374e-22	2.60254e-20	Eya2	2	165595032	165771727	+	2963	protein_coding	EYA transcriptional coactivator and phosphatase 2 [Source:MGI Symbol;Acc:MGI:109341]	-
ENSMUSG00000041757	122.695	114.68	169.026	181.056	176.541	89.9459	567.325	743.271	440.549	496.783	642.409	820.856	142.324	618.532	-2.12277	8.8515e-22	2.71813e-20	Plekha6	1	133164210	133303435	+	12530	protein_coding	pleckstrin homology domain containing, family A member 6 [Source:MGI Symbol;Acc:MGI:2388662]	-
ENSMUSG00000031578	441.119	419.488	642.555	612.202	460.002	685.41	162.946	187.963	192.689	144.603	178.147	198.389	543.463	177.456	1.61427	9.60037e-22	2.94416e-20	Mak16	8	31159463	31168764	-	2239	protein_coding	MAK16 homolog [Source:MGI Symbol;Acc:MGI:1915170]	-
ENSMUSG00000006235	0	5.02983	2.58054	3.90767	0	2.27711	42.656	54.0717	52.7012	62.9725	48.5856	64.6129	2.29919	54.2666	-4.56767	1.13358e-21	3.47171e-20	Epor	9	21958897	21963506	-	1989	protein_coding	erythropoietin receptor [Source:MGI Symbol;Acc:MGI:95408]	-
ENSMUSG00000030223	19.4754	32.1909	20.6444	9.1179	27.3515	48.9579	134.793	178.522	239.626	187.363	163.751	204.759	26.2897	184.802	-2.80614	1.16122e-21	3.55163e-20	Ptpro	6	137252319	137463233	+	6723	protein_coding	protein tyrosine phosphatase, receptor type, O [Source:MGI Symbol;Acc:MGI:1097152]	-
ENSMUSG00000051007	127.564	99.5907	82.5774	128.953	151.676	154.844	377.079	348.462	387.848	320.304	386.885	370.386	124.201	365.161	-1.55573	1.19936e-21	3.66339e-20	Gatd1	7	141407794	141414136	-	3633	protein_coding	glutamine amidotransferase like class 1 domain containing 1 [Source:MGI Symbol;Acc:MGI:2387178]	-
ENSMUSG00000079197	3124.83	3280.46	3690.18	2762.73	2727.69	4488.19	922.223	729.538	892.627	939.145	1332.5	1183.96	3345.68	1000	1.74249	1.20563e-21	3.67765e-20	Psme2	14	55587441	55591113	-	1764	protein_coding	proteasome (prosome, macropain) activator subunit 2 (PA28 beta) [Source:MGI Symbol;Acc:MGI:1096365]	-
ENSMUSG00000031939	746.883	942.591	761.261	919.606	897.625	1077.07	363.429	349.32	251.154	282.987	402.181	303.953	890.84	325.504	1.45299	1.25112e-21	3.81135e-20	Taf1d	9	15306214	15316991	+	8949	protein_coding	TATA-box binding protein associated factor, RNA polymerase I, D [Source:MGI Symbol;Acc:MGI:1922566]	-
ENSMUSG00000025145	64.2689	64.3819	98.0607	100.297	77.0814	66.0362	209.014	216.287	223.98	255	248.326	288.483	78.3543	240.182	-1.62465	1.2777e-21	3.88714e-20	Lrrc45	11	120713925	120721128	+	3293	protein_coding	leucine rich repeat containing 45 [Source:MGI Symbol;Acc:MGI:2387183]	-
ENSMUSG00000019577	54512.7	49767.2	49111.6	59101	60668	30059	6824.96	7840.39	3437.11	3306.44	11547.2	8586.23	50536.6	6923.72	2.86773	1.33476e-21	4.05538e-20	Pdk4	6	5483351	5496309	-	3511	protein_coding	pyruvate dehydrogenase kinase, isoenzyme 4 [Source:MGI Symbol;Acc:MGI:1351481]	-
ENSMUSG00000044749	46.741	54.3222	14.193	19.5384	17.4055	36.4338	368.548	720.097	422.433	710.578	182.646	267.552	31.439	445.309	-3.81309	1.36139e-21	4.13081e-20	Abca6	11	110176820	110251776	-	5398	protein_coding	ATP-binding cassette, sub-family A (ABC1), member 6 [Source:MGI Symbol;Acc:MGI:1923434]	-
ENSMUSG00000030162	299.922	118.704	83.8677	56.01	69.6219	519.181	0.85312	5.14968	3.29383	4.66463	0.899733	4.5502	191.218	3.2352	5.8815	1.41923e-21	4.30064e-20	Olr1	6	129485244	129507165	-	3572	protein_coding	oxidized low density lipoprotein (lectin-like) receptor 1 [Source:MGI Symbol;Acc:MGI:1261434]	-
ENSMUSG00000091549	512.204	728.32	580.622	435.054	512.218	860.748	105.787	127.025	175.396	195.914	131.361	110.115	604.861	140.933	2.10075	1.45745e-21	4.41061e-20	Gm6548	17	78850792	78851956	-	1165	processed_pseudogene	predicted gene 6548 [Source:MGI Symbol;Acc:MGI:3644071]	-
ENSMUSG00000108371	100.298	67.3998	170.316	155.004	144.217	81.976	12.7968	12.0159	10.7049	16.3262	9.89706	25.4811	119.869	14.537	3.04245	1.63788e-21	4.95012e-20	Gm38832	6	72162849	72167707	+	400	lincRNA	predicted gene, 38832 [Source:MGI Symbol;Acc:MGI:5621717]	-
ENSMUSG00000018809	58.4263	63.3759	45.1595	57.3125	57.1894	63.7591	146.737	188.822	151.516	167.927	146.656	152.887	57.5371	159.091	-1.46275	1.72357e-21	5.20223e-20	Smyd4	11	75348433	75405705	+	4329	protein_coding	SET and MYND domain containing 4 [Source:MGI Symbol;Acc:MGI:2442796]	-
ENSMUSG00000027399	206.44	144.859	82.5774	56.01	83.2977	232.265	0	0.85828	0	0	0	0.91004	134.242	0.29472	8.7821	1.74095e-21	5.24779e-20	Il1a	2	129299610	129309972	-	1974	protein_coding	interleukin 1 alpha [Source:MGI Symbol;Acc:MGI:96542]	-
ENSMUSG00000007682	334.004	402.387	246.442	384.255	308.326	253.898	58.0122	30.8981	18.1161	20.2134	69.2794	50.9622	321.552	41.2469	2.96687	1.75202e-21	5.27423e-20	Dio2	12	90724552	90738438	-	5815	protein_coding	deiodinase, iodothyronine, type II [Source:MGI Symbol;Acc:MGI:1338833]	-
novel.414	42.8459	73.4356	69.6747	54.7074	74.5949	103.609	3.41248	0	0	1.55488	0	7.28032	69.8112	2.04128	5.12252	1.76126e-21	5.2951e-20	-	6	47999861	48006968	-	487	-	- && - && -	-
ENSMUSG00000021003	94.4558	83.4952	74.8358	83.3637	64.6489	68.3133	228.636	203.412	181.161	190.472	219.535	235.7	78.1855	209.819	-1.41841	1.77482e-21	5.32886e-20	Galc	12	98202294	98259459	-	14879	protein_coding	galactosylceramidase [Source:MGI Symbol;Acc:MGI:95636]	-
ENSMUSG00000047098	1043.88	1087.45	1236.08	808.888	1061.73	947.278	399.26	375.927	436.432	506.112	359.893	445.01	1030.89	420.439	1.29358	1.83666e-21	5.50016e-20	Rnf31	14	55591708	55603693	+	5734	protein_coding	ring finger protein 31 [Source:MGI Symbol;Acc:MGI:1934704]	-
ENSMUSG00000034413	21.423	22.1313	14.193	15.6307	7.45949	10.247	91.2839	67.8041	88.1099	74.634	91.7728	83.7237	15.1807	82.8881	-2.42428	1.96314e-21	5.87126e-20	Neurl1b	17	26414829	26446349	+	6331	protein_coding	neuralized E3 ubiquitin protein ligase 1B [Source:MGI Symbol;Acc:MGI:3643092]	-
ENSMUSG00000037455	74.0066	82.4893	64.5136	45.5895	59.6759	62.6206	233.755	212.854	255.272	265.106	162.852	202.029	64.8159	221.978	-1.76928	2.19132e-21	6.53664e-20	Slc18b1	10	23796986	23827968	+	3258	protein_coding	solute carrier family 18, subfamily B, member 1 [Source:MGI Symbol;Acc:MGI:1923556]	-
ENSMUSG00000050765	5.84263	4.02387	0	0	2.4865	3.41567	43.5091	58.3631	64.2296	69.9694	40.488	68.253	2.62811	57.4687	-4.35218	2.39672e-21	7.14006e-20	Gm5084	13	60205471	60216023	+	3609	lincRNA	predicted gene 5084 [Source:MGI Symbol;Acc:MGI:3647835]	-
ENSMUSG00000052160	134.38	235.396	83.8677	106.81	68.3787	168.506	637.281	825.666	938.741	947.697	657.705	748.053	132.89	792.524	-2.57232	2.4176e-21	7.1929e-20	Pld4	12	112760655	112768990	+	3462	protein_coding	phospholipase D family, member 4 [Source:MGI Symbol;Acc:MGI:2144765]	-
ENSMUSG00000029171	871.526	742.403	566.429	622.623	474.921	674.025	175.743	169.939	225.627	246.448	150.255	145.606	658.654	185.603	1.82696	2.561e-21	7.60969e-20	Pgm1	5	64092950	64128351	+	2590	protein_coding	phosphoglucomutase 1 [Source:MGI Symbol;Acc:MGI:97564]	-
ENSMUSG00000028889	800.44	760.511	1037.38	1014.69	975.95	1131.72	307.976	322.713	307.149	263.551	428.273	388.587	953.449	336.375	1.5033	2.58635e-21	7.67506e-20	Yrdc	4	124850679	124855242	+	1981	protein_coding	yrdC domain containing (E.coli) [Source:MGI Symbol;Acc:MGI:2387201]	-
ENSMUSG00000060216	139.249	166.99	206.444	214.922	191.46	149.151	397.554	483.212	607.711	579.191	565.932	682.53	178.036	552.688	-1.6375	2.6598e-21	7.88284e-20	Arrb2	11	70432635	70440828	+	2845	protein_coding	arrestin, beta 2 [Source:MGI Symbol;Acc:MGI:99474]	-
ENSMUSG00000006930	520.968	542.216	268.377	139.374	223.785	605.712	17.9155	5.14968	27.1741	32.6524	11.6965	3.64016	383.405	16.3714	4.54383	2.66946e-21	7.90126e-20	Hap1	11	100347327	100356128	-	3766	protein_coding	huntingtin-associated protein 1 [Source:MGI Symbol;Acc:MGI:1261831]	-
ENSMUSG00000025287	1860.88	2126.61	1996.05	2200.02	1766.66	2381.86	818.142	780.177	969.209	788.322	1101.27	892.749	2055.35	891.645	1.20501	2.85331e-21	8.43454e-20	Acot9	X	155262443	155297654	+	2273	protein_coding	acyl-CoA thioesterase 9 [Source:MGI Symbol;Acc:MGI:1928939]	-
ENSMUSG00000037242	43619.1	47668.7	19298.6	12293.5	17318.5	47572.3	3339.97	2951.63	4183.98	4697.28	2380.69	2493.51	31295.1	3341.18	3.2275	2.9518e-21	8.71445e-20	Clic4	4	135213969	135272814	-	6572	protein_coding	chloride intracellular channel 4 (mitochondrial) [Source:MGI Symbol;Acc:MGI:1352754]	-
ENSMUSG00000021482	457.673	491.918	594.815	467.618	468.705	506.657	1003.27	1207.6	1165.19	1383.84	990.606	1027.44	497.898	1129.66	-1.18283	2.97459e-21	8.77047e-20	Aaed1	13	64275280	64312710	-	3850	protein_coding	AhpC/TSA antioxidant enzyme domain containing 1 [Source:MGI Symbol;Acc:MGI:1913379]	-
ENSMUSG00000027540	3885.35	4130.5	2615.38	2318.55	2404.44	3427.05	658.609	737.263	929.683	1004.45	481.357	631.568	3130.21	740.488	2.07963	2.99092e-21	8.80727e-20	Ptpn1	2	167932057	167979385	+	5533	protein_coding	protein tyrosine phosphatase, non-receptor type 1 [Source:MGI Symbol;Acc:MGI:97805]	-
novel.327	40.8984	42.2506	6.45136	15.6307	17.4055	34.1567	366.842	381.935	1213.78	1549.43	337.4	285.753	26.1322	689.19	-4.71178	3.0788e-21	9.05444e-20	-	4	129382693	129407493	+	8156	-	- && - && -	-
ENSMUSG00000022637	1352.57	1281.6	978.026	1012.09	1020.71	1304.78	418.029	467.763	450.431	502.225	459.764	578.786	1158.3	479.499	1.27335	3.18342e-21	9.35011e-20	Cblb	16	52031225	52208048	+	10475	protein_coding	Casitas B-lineage lymphoma b [Source:MGI Symbol;Acc:MGI:2146430]	-
ENSMUSG00000028385	64.2689	76.4535	69.6747	42.9844	36.0542	51.235	223.517	237.744	247.037	310.198	183.546	195.659	56.7784	232.95	-2.03105	3.36093e-21	9.85886e-20	Snx30	4	59805840	59904737	+	7795	protein_coding	sorting nexin family member 30 [Source:MGI Symbol;Acc:MGI:2443882]	-
ENSMUSG00000018920	1883.27	1830.86	1385.75	1111.08	1209.68	2978.46	179.155	241.177	447.137	329.634	252.825	255.721	1733.18	284.275	2.60794	3.36954e-21	9.8715e-20	Cxcl16	11	70453983	70459984	-	3021	protein_coding	chemokine (C-X-C motif) ligand 16 [Source:MGI Symbol;Acc:MGI:1932682]	-
ENSMUSG00000066245	134.38	134.8	123.866	148.492	133.028	179.892	43.5091	54.0717	45.2901	51.3109	51.2848	35.4916	142.41	46.8264	1.60313	3.5079e-21	1.02637e-19	Gm10156	7	107863039	107863500	+	462	processed_pseudogene	predicted gene 10156 [Source:MGI Symbol;Acc:MGI:3642344]	-
ENSMUSG00000059970	1238.64	960.698	1205.11	1432.81	1663.47	808.374	356.604	212.854	387.025	353.734	307.709	280.292	1218.18	316.37	1.94444	3.5221e-21	1.02922e-19	Hspa2	12	76404176	76406938	+	2644	protein_coding	heat shock protein 2 [Source:MGI Symbol;Acc:MGI:96243]	-
ENSMUSG00000031342	1816.08	2168.86	1274.79	1168.39	1035.63	1806.89	480.307	468.621	345.028	414.374	350.896	423.169	1545.11	413.733	1.90143	3.53528e-21	1.03175e-19	Gpm6b	X	166238911	166388988	+	5600	protein_coding	glycoprotein m6b [Source:MGI Symbol;Acc:MGI:107672]	-
ENSMUSG00000006418	3438.39	3419.28	2892.79	2356.33	2564.82	3760.65	1342.81	1332.05	1192.37	1266.45	1086.88	1204.89	3072.04	1237.57	1.31191	3.59278e-21	1.0472e-19	Rnf114	2	167492645	167516173	+	3356	protein_coding	ring finger protein 114 [Source:MGI Symbol;Acc:MGI:1933159]	-
ENSMUSG00000000058	525.837	790.69	463.208	237.066	330.704	378	2620.79	2561.97	1716.91	2400.73	2391.49	2531.73	454.251	2370.6	-2.38238	3.61947e-21	1.05364e-19	Cav2	6	17281185	17289115	+	3335	protein_coding	caveolin 2 [Source:MGI Symbol;Acc:MGI:107571]	-
ENSMUSG00000024843	456.699	380.255	522.56	752.878	544.543	630.76	149.296	124.451	114.461	163.262	156.554	197.479	547.949	150.917	1.85983	4.14573e-21	1.20378e-19	Chka	19	3851773	3894369	+	12024	protein_coding	choline kinase alpha [Source:MGI Symbol;Acc:MGI:107760]	-
ENSMUSG00000003420	1349.65	1846.95	1372.85	1242.64	1191.03	1546.16	3271.72	4199.57	4864.98	5212.72	3418.99	3845.83	1424.88	4135.63	-1.537	4.15905e-21	1.20613e-19	Fcgrt	7	45092990	45103851	-	2102	protein_coding	Fc receptor, IgG, alpha chain transporter [Source:MGI Symbol;Acc:MGI:103017]	-
ENSMUSG00000030718	1434.37	1175.97	1085.12	900.067	1012	1333.25	522.11	492.653	435.609	468.795	399.482	406.788	1156.8	454.239	1.34911	4.74514e-21	1.37435e-19	Ppme1	7	100326737	100372307	-	3100	protein_coding	protein phosphatase methylesterase 1 [Source:MGI Symbol;Acc:MGI:1919840]	-
ENSMUSG00000027639	9399.82	10544.5	6216.53	4153.86	5148.29	11839.8	1142.33	1242.79	1781.14	1771.78	1074.28	1303.18	7883.81	1385.92	2.50805	4.78525e-21	1.38422e-19	Samhd1	2	157097533	157135265	-	9150	protein_coding	SAM domain and HD domain, 1 [Source:MGI Symbol;Acc:MGI:1927468]	-
ENSMUSG00000024772	11393.1	11844.2	8391.93	6560.98	6554.41	13227.7	1918.67	1819.55	2816.22	2992.36	1983.01	1959.32	9662.07	2248.19	2.10356	5.08674e-21	1.46958e-19	Ehd1	19	6276725	6300096	+	3705	protein_coding	EH-domain containing 1 [Source:MGI Symbol;Acc:MGI:1341878]	-
ENSMUSG00000037138	5.84263	17.1014	3.87082	3.90767	2.4865	27.3253	123.702	185.389	171.279	219.237	149.356	146.516	10.0891	165.913	-4.01872	5.49904e-21	1.5867e-19	Aff3	1	38177326	38664955	-	6654	protein_coding	AF4/FMR2 family, member 3 [Source:MGI Symbol;Acc:MGI:106927]	AF-4
ENSMUSG00000027428	184.043	162.967	143.22	147.189	215.082	148.012	403.526	468.621	503.956	608.734	412.078	427.719	166.752	470.772	-1.49696	5.9472e-21	1.7117e-19	Rbbp9	2	144542265	144550869	-	2362	protein_coding	retinoblastoma binding protein 9, serine hydrolase [Source:MGI Symbol;Acc:MGI:1347074]	-
ENSMUSG00000006221	15101.2	15427.5	15176.2	14596.5	17059.9	10457.6	5140.9	3041.75	2509.9	3560.67	5206.76	4230.78	14636.5	3948.46	1.89024	6.85088e-21	1.96933e-19	Hspb7	4	141420779	141425311	+	2769	protein_coding	heat shock protein family, member 7 (cardiovascular) [Source:MGI Symbol;Acc:MGI:1352494]	-
ENSMUSG00000033544	247.338	284.689	110.963	92.4816	63.4057	211.771	1128.68	1289.14	1694.67	1562.65	1196.65	1281.34	168.441	1358.85	-3.00874	8.05229e-21	2.31178e-19	Angptl1	1	156838562	156861078	+	2841	protein_coding	angiopoietin-like 1 [Source:MGI Symbol;Acc:MGI:1919963]	-
ENSMUSG00000025407	23.3705	40.2387	29.6763	24.7486	28.5947	23.9097	100.668	100.419	136.694	161.707	110.667	167.447	28.4231	129.6	-2.18575	9.04526e-21	2.59361e-19	Gli1	10	127329882	127341974	-	4995	protein_coding	GLI-Kruppel family member GLI1 [Source:MGI Symbol;Acc:MGI:95727]	zf-C2H2
ENSMUSG00000066361	4908.78	5353.75	3865.66	1913.46	2982.55	2690.41	714.915	687.482	846.514	890.166	533.542	768.074	3619.1	740.115	2.28985	9.15202e-21	2.62095e-19	Serpina3c	12	104146382	104153870	-	2213	protein_coding	serine (or cysteine) peptidase inhibitor, clade A, member 3C [Source:MGI Symbol;Acc:MGI:102848]	-
ENSMUSG00000044197	3044.98	2907.24	2808.92	3322.82	3167.8	2334.04	1347.93	1352.65	1388.35	1378.4	1051.79	1037.45	2930.97	1259.43	1.21833	9.34295e-21	2.67229e-19	Gpr146	5	139377697	139396415	+	6786	protein_coding	G protein-coupled receptor 146 [Source:MGI Symbol;Acc:MGI:1933113]	-
ENSMUSG00000024589	2058.55	2042.11	1777.99	2857.81	2558.61	1598.53	721.74	687.482	810.282	525.548	785.467	711.651	2148.93	707.028	1.60378	9.79222e-21	2.79731e-19	Nedd4l	18	64887705	65217831	+	14382	protein_coding	neural precursor cell expressed, developmentally down-regulated gene 4-like [Source:MGI Symbol;Acc:MGI:1933754]	-
ENSMUSG00000044244	310.633	393.333	349.664	265.722	294.65	395.079	112.612	130.459	129.283	136.052	100.77	141.966	334.847	125.19	1.42004	9.91283e-21	2.82824e-19	Il20rb	9	100457719	100486788	-	4206	protein_coding	interleukin 20 receptor beta [Source:MGI Symbol;Acc:MGI:2143266]	-
ENSMUSG00000040829	164.567	187.11	123.866	100.297	79.5679	202.663	26.4467	20.5987	33.7617	22.5457	18.8944	21.841	143.012	24.0147	2.57545	9.99358e-21	2.84774e-19	Zmynd15	11	70459433	70466202	+	4409	protein_coding	zinc finger, MYND-type containing 15 [Source:MGI Symbol;Acc:MGI:3603821]	-
ENSMUSG00000001305	882.237	878.209	748.358	751.576	777.03	1300.23	294.326	327.863	312.09	240.228	306.809	337.625	889.607	303.157	1.55395	1.01148e-20	2.87869e-19	Rrp15	1	186720978	186749358	-	3239	protein_coding	ribosomal RNA processing 15 homolog (S. cerevisiae) [Source:MGI Symbol;Acc:MGI:1914473]	-
ENSMUSG00000026377	1320.43	1281.6	1270.92	1319.49	1212.17	1784.12	573.297	543.291	559.127	448.582	670.301	580.606	1364.79	562.534	1.27916	1.02459e-20	2.91239e-19	Nifk	1	118321839	118333822	+	1965	protein_coding	nucleolar protein interacting with the FHA domain of MKI67 [Source:MGI Symbol;Acc:MGI:1915199]	-
ENSMUSG00000046711	3360.49	2798.6	1959.92	1784.5	2051.36	4916.28	600.597	615.387	529.483	479.679	599.222	672.52	2811.86	582.815	2.27071	1.04223e-20	2.95888e-19	Hmga1	17	27556497	27563674	+	2125	protein_coding	high mobility group AT-hook 1 [Source:MGI Symbol;Acc:MGI:96160]	HMGI/HMGY
ENSMUSG00000021540	3981.75	3319.69	2887.63	2991.98	3349.31	2864.61	1091.99	1155.25	1388.35	1606.19	1039.19	1011.05	3232.49	1215.34	1.41117	1.11016e-20	3.14783e-19	Smad5	13	56703010	56742377	+	7420	protein_coding	SMAD family member 5 [Source:MGI Symbol;Acc:MGI:1328787]	MH1
ENSMUSG00000022216	5298.29	4805.5	4943.03	4302.35	4535.37	7104.59	1747.19	1882.21	2389.67	2140.29	1803.07	1948.4	5164.86	1985.14	1.37948	1.11209e-20	3.1494e-19	Psme1	14	55578123	55581529	+	2209	protein_coding	proteasome (prosome, macropain) activator subunit 1 (PA28 alpha) [Source:MGI Symbol;Acc:MGI:1096367]	-
ENSMUSG00000021614	4364.44	6294.33	2005.08	1637.32	1700.76	4947.02	495.663	359.619	439.726	475.014	358.094	309.414	3491.49	406.255	3.10341	1.12454e-20	3.18075e-19	Vcan	13	89655312	89742509	-	14462	protein_coding	versican [Source:MGI Symbol;Acc:MGI:102889]	-
ENSMUSG00000047003	27.2656	18.1074	15.4833	19.5384	8.70274	11.3856	128.821	72.0955	104.579	119.725	85.4746	93.7341	16.7472	100.738	-2.5735	1.17318e-20	3.31422e-19	Zfp41	15	75616679	75629827	+	8595	protein_coding	zinc finger protein 41 [Source:MGI Symbol;Acc:MGI:99186]	zf-C2H2
ENSMUSG00000020160	92.5083	92.5489	51.6109	53.4049	44.7569	108.163	307.976	275.508	424.08	429.923	326.603	323.974	73.8321	348.011	-2.22957	1.18672e-20	3.34837e-19	Meis1	11	18879817	19018985	-	10532	protein_coding	Meis homeobox 1 [Source:MGI Symbol;Acc:MGI:104717]	Homeobox
ENSMUSG00000045838	236.626	205.217	196.121	211.014	215.082	159.398	545.144	443.731	427.374	503.78	422.875	516.903	203.91	476.634	-1.224	1.2465e-20	3.51271e-19	Ccdc9b	2	118754158	118762661	-	4779	protein_coding	coiled-coil domain containing 9B [Source:MGI Symbol;Acc:MGI:2685199]	-
ENSMUSG00000029122	223.967	219.301	181.928	188.871	223.785	161.675	679.084	673.75	895.921	1063.53	529.943	534.194	199.921	729.404	-1.86684	1.4033e-20	3.94882e-19	Evc	5	37289098	37336894	-	7701	protein_coding	EvC ciliary complex subunit 1 [Source:MGI Symbol;Acc:MGI:1890596]	-
ENSMUSG00000028957	154.83	169.002	270.957	152.399	319.515	160.536	650.078	962.132	771.579	1166.16	1170.55	1273.15	204.54	998.941	-2.28967	1.4047e-20	3.94882e-19	Per3	4	151003652	151044665	-	9608	protein_coding	period circadian clock 3 [Source:MGI Symbol;Acc:MGI:1277134]	-
ENSMUSG00000014813	389.509	273.623	187.089	197.989	165.352	128.657	45.2154	25.7484	28.821	25.6554	30.5909	11.8305	223.703	27.9769	2.9998	1.40755e-20	3.95199e-19	Stc1	14	69029238	69041804	+	4197	protein_coding	stanniocalcin 1 [Source:MGI Symbol;Acc:MGI:109131]	-
ENSMUSG00000028031	83.7444	156.931	118.705	79.456	128.055	121.825	382.198	615.387	489.133	810.868	456.165	404.058	114.786	526.301	-2.19638	1.45156e-20	4.06569e-19	Dkk2	3	132085292	132180304	+	3705	protein_coding	dickkopf WNT signaling pathway inhibitor 2 [Source:MGI Symbol;Acc:MGI:1890663]	-
ENSMUSG00000044337	7816.46	7661.44	5992.02	6618.3	5532.46	11558.6	2300.87	2432.37	2426.73	2588.87	1912.83	1960.23	7529.88	2270.31	1.72973	1.45159e-20	4.06569e-19	Ackr3	1	90203980	90216751	+	3348	protein_coding	atypical chemokine receptor 3 [Source:MGI Symbol;Acc:MGI:109562]	-
ENSMUSG00000002319	902.686	808.797	987.058	1032.93	1021.95	1013.31	431.679	418.841	493.251	402.713	498.452	525.093	961.122	461.671	1.05763	1.50442e-20	4.20853e-19	Ipo4	14	55625400	55635957	-	4669	protein_coding	importin 4 [Source:MGI Symbol;Acc:MGI:1923001]	-
ENSMUSG00000117257	31.1607	77.4594	43.8693	33.8665	53.4597	89.9459	0	0	0	0	0	0	54.9602	0	8.45491	1.6124e-20	4.50508e-19	AC159187.1	17	73870431	73871350	-	920	processed_pseudogene	trans-2,3-enoyl-CoA reductase (Tecr) pseudogene	-
ENSMUSG00000032327	521.942	373.214	150.962	143.281	156.649	432.651	15.3562	11.1576	37.879	11.6616	9.89706	4.5502	296.45	15.0836	4.2938	1.62941e-20	4.54709e-19	Stra6	9	58063788	58153996	+	5829	protein_coding	stimulated by retinoic acid gene 6 [Source:MGI Symbol;Acc:MGI:107742]	-
novel.377	30.1869	57.3401	45.1595	67.733	55.9462	44.4037	1.70624	1.71656	1.64691	0	4.49867	6.37028	50.1282	2.65644	4.27537	1.73626e-20	4.83939e-19	-	5	145253897	145262249	+	1414	-	- && P11369.2 RecName: Full=LINE-1 retrotransposable element ORF2 protein; Short=ORF2p; AltName: Full=Long interspersed element-1; Short=L1; AltName: Full=Retrovirus-related Pol polyprotein LINE-1; Includes: RecName: Full=Reverse transcriptase; Includes:	-
ENSMUSG00000030474	291.158	302.796	252.893	214.922	208.866	284.639	23.8874	43.7723	44.4667	87.8505	45.8864	32.7614	259.212	46.4374	2.47771	1.81637e-20	5.05049e-19	Siglece	7	43651070	43660161	-	1849	protein_coding	sialic acid binding Ig-like lectin E [Source:MGI Symbol;Acc:MGI:1932475]	-
ENSMUSG00000020101	328.161	274.629	139.349	155.004	118.109	220.88	993.032	1140.65	1561.27	1736.8	882.638	980.113	206.022	1215.75	-2.55823	1.81641e-20	5.05049e-19	Vsir	10	60346851	60372684	+	5014	protein_coding	V-set immunoregulatory receptor [Source:MGI Symbol;Acc:MGI:1921298]	-
ENSMUSG00000048402	16.5541	2.01193	5.16109	18.2358	7.45949	6.83133	116.024	120.159	237.979	355.289	99.8704	132.866	9.37563	177.031	-4.24233	1.85177e-20	5.14257e-19	Gli2	1	118834132	119053619	-	6869	protein_coding	GLI-Kruppel family member GLI2 [Source:MGI Symbol;Acc:MGI:95728]	zf-C2H2
ENSMUSG00000038264	3801.6	2300.65	1979.28	2388.89	1561.52	1236.47	377.932	272.933	138.341	274.436	262.722	489.602	2211.4	302.661	2.86961	1.86621e-20	5.17643e-19	Sema7a	9	57940112	57962865	+	3298	protein_coding	sema domain, immunoglobulin domain (Ig), and GPI membrane anchor, (semaphorin) 7A [Source:MGI Symbol;Acc:MGI:1306826]	-
ENSMUSG00000038357	88.6132	87.5191	32.2568	50.7998	31.0812	81.976	0.85312	2.57484	2.47037	0.777438	0.899733	0	62.041	1.26258	5.61101	1.89093e-20	5.23866e-19	Camp	9	109847379	109849617	-	758	protein_coding	cathelicidin antimicrobial peptide [Source:MGI Symbol;Acc:MGI:108443]	-
ENSMUSG00000086290	711.827	598.55	1207.69	1151.46	1061.73	982.573	282.383	274.65	296.445	261.997	256.424	338.535	952.307	285.072	1.73938	2.20988e-20	6.10018e-19	Snhg12	4	132308623	132311024	+	2402	lincRNA	small nucleolar RNA host gene 12 [Source:MGI Symbol;Acc:MGI:1916721]	-
ENSMUSG00000015176	1906.64	1766.48	1469.62	1411.97	1472.01	2458.14	672.259	606.804	678.529	693.475	608.22	668.88	1747.48	654.694	1.41666	2.4034e-20	6.6264e-19	Nolc1	19	46075863	46085530	+	4483	protein_coding	nucleolar and coiled-body phosphoprotein 1 [Source:MGI Symbol;Acc:MGI:1918019]	-
ENSMUSG00000047146	5.84263	3.0179	7.74163	2.60512	3.72975	7.96989	71.6621	56.6465	38.7025	56.753	43.1872	58.2426	5.15115	54.199	-3.39601	2.48784e-20	6.85097e-19	Tet1	10	62804570	62908996	-	15457	protein_coding	tet methylcytosine dioxygenase 1 [Source:MGI Symbol;Acc:MGI:1098693]	-
ENSMUSG00000049303	557.971	426.53	474.82	515.813	355.569	382.555	101.521	118.443	88.1099	162.484	57.5829	78.2635	452.21	101.067	2.15967	2.53663e-20	6.9686e-19	Syt12	19	4445908	4477447	-	5539	protein_coding	synaptotagmin XII [Source:MGI Symbol;Acc:MGI:2159601]	-
ENSMUSG00000021872	85.6919	185.098	69.6747	62.5228	54.7029	166.229	9.38432	5.14968	7.41111	11.6616	2.6992	6.37028	103.987	7.11269	3.86314	2.64518e-20	7.25811e-19	Rnase10	14	51007751	51010758	+	1665	protein_coding	ribonuclease, RNase A family, 10 (non-active) [Source:MGI Symbol;Acc:MGI:1922269]	-
ENSMUSG00000022035	1890.09	2049.15	1496.72	1288.23	1351.41	2628.92	566.472	602.513	529.483	485.899	574.03	473.221	1784.09	538.603	1.72827	2.75473e-20	7.54966e-19	Ccdc25	14	65837302	65866607	+	4897	protein_coding	coiled-coil domain containing 25 [Source:MGI Symbol;Acc:MGI:1914429]	-
ENSMUSG00000036775	71.0853	46.2745	29.6763	69.0356	63.4057	69.4519	240.58	415.408	368.909	377.835	207.838	226.6	58.1549	306.195	-2.39524	2.94016e-20	8.04825e-19	Decr2	17	26081211	26090329	-	2288	protein_coding	2-4-dienoyl-Coenzyme A reductase 2, peroxisomal [Source:MGI Symbol;Acc:MGI:1347059]	-
ENSMUSG00000078922	2353.61	1059.28	987.058	471.526	593.03	2694.96	53.7466	51.4968	121.048	135.274	33.2901	81.9036	1359.91	79.4599	4.09633	3.06492e-20	8.37977e-19	Tgtp1	11	48985327	48994172	-	3205	protein_coding	T cell specific GTPase 1 [Source:MGI Symbol;Acc:MGI:98734]	-
ENSMUSG00000010663	286.289	279.659	229.668	222.737	167.839	248.205	845.442	1337.2	1823.96	1641.95	749.478	822.676	239.066	1203.45	-2.33076	3.21581e-20	8.78185e-19	Fads1	19	10182888	10196870	+	3456	protein_coding	fatty acid desaturase 1 [Source:MGI Symbol;Acc:MGI:1923517]	-
ENSMUSG00000013707	58.4263	75.4475	43.8693	46.8921	46.0002	77.4218	193.658	294.39	294.798	323.414	172.749	228.42	58.0095	251.238	-2.10893	3.24361e-20	8.84724e-19	Tnfaip8l2	3	95139521	95142360	-	1122	protein_coding	tumor necrosis factor, alpha-induced protein 8-like 2 [Source:MGI Symbol;Acc:MGI:1917019]	-
ENSMUSG00000005800	86.6657	127.758	52.9012	42.9844	32.3245	60.3434	0.85312	1.71656	0	0.777438	0.899733	1.82008	67.1628	1.01116	6.08004	3.30498e-20	9.00392e-19	Mmp8	9	7558456	7568485	+	2425	protein_coding	matrix metallopeptidase 8 [Source:MGI Symbol;Acc:MGI:1202395]	-
ENSMUSG00000002797	974.745	851.048	827.064	876.621	764.598	1555.27	284.942	230.877	314.561	195.137	303.21	281.202	974.891	268.322	1.86182	3.75553e-20	1.02192e-18	Ggct	6	54982580	54992950	-	7745	protein_coding	gamma-glutamyl cyclotransferase [Source:MGI Symbol;Acc:MGI:95700]	-
ENSMUSG00000032688	531.679	541.21	452.885	415.516	358.056	454.284	152.709	178.522	178.69	202.134	167.35	214.769	458.938	182.362	1.33304	4.54756e-20	1.23451e-18	Malt1	18	65430962	65478823	+	11735	protein_coding	MALT1 paracaspase [Source:MGI Symbol;Acc:MGI:2445027]	-
ENSMUSG00000022538	816.994	765.541	656.748	782.837	768.328	890.35	415.47	385.368	408.435	416.707	366.191	328.525	780.133	386.782	1.01209	4.70491e-20	1.27572e-18	Lsg1	16	30560494	30587592	-	6192	protein_coding	large 60S subunit nuclear export GTPase 1 [Source:MGI Symbol;Acc:MGI:107236]	-
ENSMUSG00000048636	58.4263	59.352	73.5455	119.835	69.6219	29.6024	0	0.85828	0	4.66463	0	2.73012	68.3973	1.3755	5.60164	4.82986e-20	1.30805e-18	A730049H05Rik	6	92816478	92847174	+	3739	protein_coding	RIKEN cDNA A730049H05 gene [Source:MGI Symbol;Acc:MGI:1921766]	-
ENSMUSG00000019853	14.6066	19.1134	5.16109	11.723	16.1622	9.10844	78.4871	76.3869	124.342	100.289	63.8811	73.7133	12.6458	86.1833	-2.75163	4.91354e-20	1.32915e-18	Hebp2	10	18539498	18546076	-	3930	protein_coding	heme binding protein 2 [Source:MGI Symbol;Acc:MGI:1860084]	-
ENSMUSG00000102376	149.961	97.5788	136.769	127.651	126.811	59.2049	10.2374	18.8822	9.05803	6.99694	22.4933	20.9309	116.329	14.7665	2.9868	5.3935e-20	1.45726e-18	Gm37975	2	11532596	11534694	-	2099	TEC	predicted gene, 37975 [Source:MGI Symbol;Acc:MGI:5611203]	-
ENSMUSG00000046314	89.587	98.5847	58.0622	31.2614	28.5947	75.1447	375.373	474.629	325.265	457.133	321.205	380.397	63.5391	389	-2.60525	5.4376e-20	1.46745e-18	Stxbp6	12	44852484	45074709	-	5297	protein_coding	syntaxin binding protein 6 (amisyn) [Source:MGI Symbol;Acc:MGI:2384963]	-
ENSMUSG00000068079	51.6099	25.1492	21.9346	45.5895	17.4055	21.6326	341.248	284.091	165.515	143.826	504.75	332.165	30.5535	295.266	-3.26823	5.49374e-20	1.48086e-18	Tcf15	2	152143561	152149097	+	980	protein_coding	transcription factor 15 [Source:MGI Symbol;Acc:MGI:104664]	bHLH
ENSMUSG00000030199	1581.41	1581.38	903.19	761.996	887.679	1525.66	224.371	284.091	271.741	386.387	239.329	250.261	1206.89	276.03	2.1285	5.66254e-20	1.52457e-18	Etv6	6	134035700	134270158	+	5983	protein_coding	ets variant 6 [Source:MGI Symbol;Acc:MGI:109336]	ETS
ENSMUSG00000060487	30.1869	21.1253	24.5152	13.0256	13.6757	13.6627	92.137	98.7022	87.2864	72.3017	91.7728	89.1839	19.3652	88.564	-2.17446	5.71134e-20	1.5359e-18	Samd5	10	9622936	9675208	-	6922	protein_coding	sterile alpha motif domain containing 5 [Source:MGI Symbol;Acc:MGI:2444815]	-
ENSMUSG00000035505	482.017	440.613	412.887	470.223	420.218	680.856	204.749	170.798	148.222	148.491	191.643	175.638	484.469	173.257	1.48461	5.97152e-20	1.60399e-18	Cox18	5	90214724	90224001	-	2710	protein_coding	cytochrome c oxidase assembly protein 18 [Source:MGI Symbol;Acc:MGI:2448532]	-
ENSMUSG00000027490	35.0558	30.179	30.9665	16.9333	16.1622	38.7109	110.053	125.309	191.042	166.372	129.562	116.485	28.0013	139.804	-2.30947	6.03074e-20	1.618e-18	E2f1	2	154559407	154569892	-	3154	protein_coding	E2F transcription factor 1 [Source:MGI Symbol;Acc:MGI:101941]	E2F
ENSMUSG00000026896	4721.82	7286.22	3313.42	1503.15	2517.58	5937.57	371.96	448.881	607.711	680.258	271.719	309.414	4213.29	448.324	3.23217	6.05932e-20	1.62377e-18	Ifih1	2	62595798	62646255	-	8165	protein_coding	interferon induced with helicase C domain 1 [Source:MGI Symbol;Acc:MGI:1918836]	-
ENSMUSG00000000532	3994.41	3616.45	2190.88	2327.67	2572.28	3562.54	978.529	986.164	749.346	1114.07	844.849	708.921	3044.04	896.98	1.76296	6.58396e-20	1.76204e-18	Acvr1b	15	101174067	101213684	+	4418	protein_coding	activin A receptor, type 1B [Source:MGI Symbol;Acc:MGI:1338944]	-
ENSMUSG00000025223	467.41	363.154	482.562	560.1	566.921	546.507	1037.39	1241.93	1581.86	1684.71	1276.72	1461.52	497.776	1380.69	-1.47289	6.59067e-20	1.76204e-18	Ldb1	19	46032593	46045214	-	3583	protein_coding	LIM domain binding 1 [Source:MGI Symbol;Acc:MGI:894762]	-
ENSMUSG00000089783	0.973772	8.04773	0	0	3.72975	3.41567	102.374	102.994	47.7605	59.0853	47.6859	84.6337	2.69449	74.0889	-4.7199	6.91763e-20	1.8473e-18	Gm454	5	138203609	138207308	-	751	lincRNA	predicted gene 454 [Source:MGI Symbol;Acc:MGI:2685300]	-
ENSMUSG00000070034	1479.16	1976.72	882.546	479.341	663.895	1936.68	94.6963	125.309	181.161	191.25	86.3744	91.004	1236.39	128.299	3.26807	7.31093e-20	1.94962e-18	Sp110	1	85576899	85598817	-	6781	protein_coding	Sp110 nuclear body protein [Source:MGI Symbol;Acc:MGI:1923364]	SAND
ENSMUSG00000041645	2946.63	3145.66	2705.7	2239.1	2631.96	3514.72	1272	1314.03	1348	1302.21	1041.89	1078.4	2863.96	1226.09	1.22402	7.31778e-20	1.94962e-18	Ddx24	12	103407982	103425830	-	8242	protein_coding	DEAD (Asp-Glu-Ala-Asp) box polypeptide 24 [Source:MGI Symbol;Acc:MGI:1351337]	-
ENSMUSG00000056596	14.6066	28.1671	18.0638	24.7486	19.892	17.0783	127.115	148.482	274.211	316.417	84.5749	141.966	20.4261	182.128	-3.15809	7.58577e-20	2.01868e-18	Trnp1	4	133491100	133498550	-	1654	protein_coding	TMF1-regulated nuclear protein 1 [Source:MGI Symbol;Acc:MGI:1916789]	-
ENSMUSG00000032175	198.649	179.062	131.608	140.676	157.893	146.874	409.498	399.1	411.728	454.801	315.806	443.19	159.127	405.687	-1.34586	7.83676e-20	2.08305e-18	Tyk2	9	21104068	21131243	-	6865	protein_coding	tyrosine kinase 2 [Source:MGI Symbol;Acc:MGI:1929470]	-
ENSMUSG00000048534	251.233	296.76	239.991	182.358	190.217	339.29	3.41248	20.5987	15.6457	28.7652	17.0949	47.3221	249.975	22.1399	3.4994	8.09741e-20	2.14984e-18	Jaml	9	45079183	45108534	+	3108	protein_coding	junction adhesion molecule like [Source:MGI Symbol;Acc:MGI:2685484]	-
ENSMUSG00000024561	3229.03	2376.09	1944.44	1445.84	1787.79	3139	539.172	628.261	653.001	750.227	618.117	578.786	2320.36	627.927	1.88585	8.3808e-20	2.22251e-18	Mbd1	18	74267605	74282732	+	6616	protein_coding	methyl-CpG binding domain protein 1 [Source:MGI Symbol;Acc:MGI:1333811]	MBD
ENSMUSG00000024528	409.958	398.363	396.114	315.219	435.137	387.109	203.896	169.081	143.282	178.033	173.648	183.828	390.316	175.295	1.156	8.61437e-20	2.28181e-18	Srfbp1	18	52465693	52490738	+	1463	protein_coding	serum response factor binding protein 1 [Source:MGI Symbol;Acc:MGI:1914472]	-
ENSMUSG00000078606	582.315	603.58	445.144	144.584	188.974	454.284	57.1591	56.6465	52.7012	45.0914	36.8891	50.0522	403.147	49.7566	3.0193	8.68703e-20	2.29841e-18	Gm4070	7	105895139	105953967	-	9275	protein_coding	predicted gene 4070 [Source:MGI Symbol;Acc:MGI:3782245]	-
ENSMUSG00000024754	2202.67	2095.43	1079.96	923.513	752.165	1370.82	283.236	283.232	228.098	248.78	149.356	155.617	1404.09	224.72	2.64351	9.39242e-20	2.48217e-18	Tmem2	19	21778342	21858327	+	6667	protein_coding	transmembrane protein 2 [Source:MGI Symbol;Acc:MGI:1890373]	-
ENSMUSG00000018171	3408.2	3123.53	5246.25	5488.98	4607.48	4156.87	1754.87	1665.92	1404.82	1319.31	1590.73	1558.9	4338.55	1549.09	1.48563	9.48637e-20	2.50412e-18	Vmp1	11	86583865	86683836	-	3862	protein_coding	vacuole membrane protein 1 [Source:MGI Symbol;Acc:MGI:1923159]	-
ENSMUSG00000020614	18.5017	32.1909	7.74163	15.6307	4.97299	33.0181	127.115	166.506	198.453	150.823	170.949	136.506	18.676	158.392	-3.0655	9.95285e-20	2.62424e-18	Fam20a	11	109669749	109722279	-	3634	protein_coding	family with sequence similarity 20, member A [Source:MGI Symbol;Acc:MGI:2388266]	-
ENSMUSG00000027395	683.588	629.735	615.46	758.089	774.544	878.965	367.695	320.139	309.62	302.423	351.796	347.635	723.397	333.218	1.11847	1.02364e-19	2.6959e-18	Polr1b	2	129100995	129126594	+	5805	protein_coding	polymerase (RNA) I polypeptide B [Source:MGI Symbol;Acc:MGI:108014]	-
ENSMUSG00000071172	5258.37	5372.87	5823	6204.08	5599.59	7663.62	2921.94	2676.12	3100.32	2857.86	3091.48	2886.65	5986.92	2922.39	1.03461	1.05079e-19	2.76423e-18	Srsf3	17	29032628	29043373	+	7899	protein_coding	serine/arginine-rich splicing factor 3 [Source:MGI Symbol;Acc:MGI:98285]	-
ENSMUSG00000036437	30.1869	18.1074	18.0638	7.81535	12.4325	12.5241	184.274	172.514	401.847	730.014	126.862	160.167	16.5217	295.946	-4.15266	1.0845e-19	2.84963e-18	Npy1r	8	66697192	66706792	+	3454	protein_coding	neuropeptide Y receptor Y1 [Source:MGI Symbol;Acc:MGI:104963]	-
ENSMUSG00000025790	2778.17	3181.87	1668.32	1496.64	1483.2	2475.22	633.868	601.654	447.137	597.072	500.252	547.844	2180.57	554.638	1.97542	1.10359e-19	2.89649e-18	Slco3a1	7	74275419	74554780	-	8474	protein_coding	solute carrier organic anion transporter family, member 3a1 [Source:MGI Symbol;Acc:MGI:1351867]	-
ENSMUSG00000028841	2226.04	2207.09	3598.57	2796.59	3921.21	1968.56	935.873	738.979	517.131	662.377	450.766	495.972	2786.34	633.516	2.13665	1.14519e-19	3.00224e-18	Cnksr1	4	134228041	134238399	-	2804	protein_coding	connector enhancer of kinase suppressor of Ras 1 [Source:MGI Symbol;Acc:MGI:2670958]	-
ENSMUSG00000000275	2912.55	3734.15	2269.59	1464.07	1740.55	2848.67	507.606	625.686	631.591	764.221	499.352	579.696	2494.93	601.359	2.0528	1.15541e-19	3.02556e-18	Trim25	11	88999376	89020293	+	5754	protein_coding	tripartite motif-containing 25 [Source:MGI Symbol;Acc:MGI:102749]	-
ENSMUSG00000040466	301.869	379.249	289.021	239.671	251.136	360.922	735.39	1006.76	1030.97	1069.75	683.797	869.998	303.645	899.445	-1.56521	1.15806e-19	3.02905e-18	Blvrb	7	27447978	27466144	+	2782	protein_coding	biliverdin reductase B (flavin reductase (NADPH)) [Source:MGI Symbol;Acc:MGI:2385271]	-
ENSMUSG00000057967	14.6066	5.02983	6.45136	0	1.24325	0	114.318	123.592	237.156	228.567	102.57	93.7341	4.55517	149.989	-4.98982	1.25762e-19	3.2857e-18	Fgf18	11	33117430	33147400	-	1187	protein_coding	fibroblast growth factor 18 [Source:MGI Symbol;Acc:MGI:1277980]	-
ENSMUSG00000026072	3857.11	4010.79	1811.54	2463.14	1968.06	2732.53	498.222	606.804	715.584	707.468	318.506	397.688	2807.2	540.712	2.37609	1.28701e-19	3.35867e-18	Il1r1	1	40225080	40317257	+	6363	protein_coding	interleukin 1 receptor, type I [Source:MGI Symbol;Acc:MGI:96545]	-
ENSMUSG00000078515	2918.39	2615.51	2318.62	2456.62	2625.74	1723.77	1029.72	1111.47	867.1	1069.75	989.706	827.227	2443.11	982.496	1.31424	1.33676e-19	3.48454e-18	Ddi2	4	141677549	141723419	-	9553	protein_coding	DNA-damage inducible protein 2 [Source:MGI Symbol;Acc:MGI:1917244]	-
ENSMUSG00000026956	198.649	175.038	157.413	216.225	118.109	223.157	528.081	581.056	811.105	799.983	490.355	572.415	181.432	630.499	-1.79657	1.42295e-19	3.70499e-18	Uap1l1	2	25359889	25365682	-	4071	protein_coding	UDP-N-acteylglucosamine pyrophosphorylase 1-like 1 [Source:MGI Symbol;Acc:MGI:2443318]	-
ENSMUSG00000041797	138.276	177.05	39.9984	36.4716	31.0812	109.301	931.607	1303.73	1305.18	1886.84	769.272	846.337	88.6964	1173.83	-3.72117	1.4749e-19	3.83592e-18	Abca9	11	110100749	110168196	-	8048	protein_coding	ATP-binding cassette, sub-family A (ABC1), member 9 [Source:MGI Symbol;Acc:MGI:2386796]	-
ENSMUSG00000037649	115.879	162.967	143.22	89.8765	62.1624	128.657	325.039	569.04	665.353	496.005	543.439	666.149	117.127	544.171	-2.21357	1.5627e-19	4.05966e-18	H2-DMa	17	34135182	34139101	+	1641	protein_coding	histocompatibility 2, class II, locus DMa [Source:MGI Symbol;Acc:MGI:95921]	-
ENSMUSG00000044807	47.7148	94.5609	55.4817	50.7998	39.784	59.2049	229.489	243.752	261.036	243.338	171.849	194.749	57.9243	224.035	-1.94569	1.60044e-19	4.15299e-18	Zfp354c	11	50811086	50827724	-	5596	protein_coding	zinc finger protein 354C [Source:MGI Symbol;Acc:MGI:1353621]	zf-C2H2
ENSMUSG00000049107	21.423	19.1134	9.0319	24.7486	17.4055	29.6024	117.731	96.1274	212.452	278.323	122.364	137.416	20.2208	160.735	-2.9877	1.71507e-19	4.44542e-18	Ntf3	6	126101412	126166910	-	1714	protein_coding	neurotrophin 3 [Source:MGI Symbol;Acc:MGI:97380]	-
ENSMUSG00000024190	8586.72	9965.1	8074.52	7164.07	6672.51	12665.3	2703.54	2495.02	2027.35	1849.52	3525.15	2468.03	8854.7	2511.44	1.81804	1.85908e-19	4.81326e-18	Dusp1	17	26505590	26508519	-	2697	protein_coding	dual specificity phosphatase 1 [Source:MGI Symbol;Acc:MGI:105120]	-
ENSMUSG00000071656	360.295	421.5	183.219	213.619	167.839	572.693	1755.72	2437.52	2973.5	3625.19	1594.33	1927.47	319.861	2385.62	-2.89774	1.9691e-19	5.09234e-18	Lrrn4cl	19	8850785	8853909	+	2583	protein_coding	LRRN4 C-terminal like [Source:MGI Symbol;Acc:MGI:1916102]	-
ENSMUSG00000032243	36.0295	68.4057	16.7735	16.9333	6.21624	33.0181	336.129	348.462	281.622	404.268	264.522	283.022	29.5627	319.671	-3.41956	2.01762e-19	5.21197e-18	Itga11	9	62677826	62783982	+	5131	protein_coding	integrin alpha 11 [Source:MGI Symbol;Acc:MGI:2442114]	-
ENSMUSG00000034993	740.066	828.916	416.758	557.495	385.407	645.561	1998.86	2222.95	3055.03	3334.43	1859.75	2323.33	595.701	2465.72	-2.04843	2.05786e-19	5.30993e-18	Vat1	11	101458745	101466230	-	2766	protein_coding	vesicle amine transport 1 [Source:MGI Symbol;Acc:MGI:1349450]	-
ENSMUSG00000042812	142.171	132.788	116.124	136.769	98.2166	121.825	19.6218	18.0239	34.5852	29.5426	7.19786	26.3912	124.649	22.5604	2.46155	2.07967e-19	5.36017e-18	Foxf1	8	121084386	121088144	+	2415	protein_coding	forkhead box F1 [Source:MGI Symbol;Acc:MGI:1347470]	Fork
novel.365	10.7115	12.0716	16.7735	9.1179	12.4325	12.5241	69.1027	83.2532	64.2296	62.9725	45.8864	64.6129	12.2719	65.0095	-2.41134	2.08513e-19	5.36821e-18	-	5	97732505	97737250	+	1068	-	- && - && -	-
ENSMUSG00000041202	42.8459	56.3341	20.6444	15.6307	17.4055	29.6024	222.664	326.146	248.684	255	119.665	281.202	30.4105	242.227	-2.97798	2.17918e-19	5.60406e-18	Pla2g2d	4	138775735	138782046	+	2243	protein_coding	phospholipase A2, group IID [Source:MGI Symbol;Acc:MGI:1341796]	-
ENSMUSG00000039199	259.997	257.527	319.987	300.891	317.028	264.145	547.703	528.701	612.652	677.926	642.409	717.112	286.596	621.084	-1.11807	2.19362e-19	5.63487e-18	Zdhhc1	8	105472423	105496902	-	4219	protein_coding	zinc finger, DHHC domain containing 1 [Source:MGI Symbol;Acc:MGI:1918046]	-
ENSMUSG00000039934	469.358	471.798	282.57	293.076	261.082	535.121	75.0746	90.1194	103.756	83.9633	121.464	97.3743	385.501	95.2919	2.01859	2.30757e-19	5.92095e-18	Gsap	5	21186255	21315132	+	10425	protein_coding	gamma-secretase activating protein [Source:MGI Symbol;Acc:MGI:2442259]	-
ENSMUSG00000031129	66.2165	129.77	64.5136	89.8765	53.4597	92.223	273.852	290.099	298.915	346.737	275.318	287.573	82.6765	295.416	-1.83309	2.50273e-19	6.41454e-18	Slc9a9	9	94669909	95230445	+	5679	protein_coding	solute carrier family 9 (sodium/hydrogen exchanger), member 9 [Source:MGI Symbol;Acc:MGI:2679732]	-
ENSMUSG00000027550	99.3247	93.5549	76.1261	78.1535	88.2706	109.301	214.133	210.279	218.216	288.429	225.833	230.24	90.7885	231.188	-1.34425	2.68916e-19	6.88468e-18	Lrrcc1	3	14533788	14572658	+	7475	protein_coding	leucine rich repeat and coiled-coil domain containing 1 [Source:MGI Symbol;Acc:MGI:1918960]	-
ENSMUSG00000067928	16.5541	25.1492	2.58054	14.3281	16.1622	11.3856	71.6621	115.01	101.285	137.606	104.369	90.094	14.36	103.338	-2.82589	2.7135e-19	6.93925e-18	Zfp760	17	21707741	21725636	+	4209	protein_coding	zinc finger protein 760 [Source:MGI Symbol;Acc:MGI:2679257]	zf-C2H2
ENSMUSG00000052957	769.28	692.105	310.956	593.966	507.245	1106.68	4473.76	4345.47	12414.4	13479.2	4274.63	3760.29	663.371	7124.63	-3.42468	2.72297e-19	6.9557e-18	Gas1	13	60174405	60177365	-	2961	protein_coding	growth arrest specific 1 [Source:MGI Symbol;Acc:MGI:95655]	-
ENSMUSG00000115025	34.082	42.2506	43.8693	40.3793	33.5677	36.4338	0	3.43312	1.64691	0	0	2.73012	38.4304	1.30169	4.90705	2.74436e-19	7.00255e-18	Gm4240	14	70302207	70302939	+	571	processed_pseudogene	predicted gene 4240 [Source:MGI Symbol;Acc:MGI:3782417]	-
ENSMUSG00000043015	11.6853	9.0537	9.0319	10.4205	12.4325	11.3856	54.5997	48.922	55.9951	54.4206	64.7808	82.8137	10.6682	60.2553	-2.49513	2.88283e-19	7.33955e-18	Nemp2	1	52630703	52651919	+	7078	protein_coding	nuclear envelope integral membrane protein 2 [Source:MGI Symbol;Acc:MGI:2444113]	-
ENSMUSG00000070729	251.233	284.689	192.251	162.82	263.569	242.512	83.6058	73.8121	66.7	80.8535	49.4853	52.7823	232.845	67.8732	1.77823	2.93815e-19	7.4638e-18	Gm12966	4	129899093	129899902	+	810	processed_pseudogene	predicted gene 12966 [Source:MGI Symbol;Acc:MGI:3652043]	-
ENSMUSG00000031661	12.659	20.1193	6.45136	18.2358	12.4325	33.0181	214.986	147.624	601.124	566.752	164.651	133.776	17.1527	304.819	-4.14818	2.94785e-19	7.48017e-18	Nkd1	8	88521354	88594884	+	4558	protein_coding	naked cuticle 1 [Source:MGI Symbol;Acc:MGI:2135954]	-
ENSMUSG00000027954	223.967	184.092	193.541	184.963	182.758	260.729	439.357	424.849	530.306	533.322	597.423	482.321	205.008	501.263	-1.28852	3.00335e-19	7.61259e-18	Efna1	3	89271733	89281142	-	1830	protein_coding	ephrin A1 [Source:MGI Symbol;Acc:MGI:103236]	-
ENSMUSG00000036104	2251.36	1921.4	1500.59	2173.97	1807.68	2398.94	905.16	885.745	864.63	967.91	744.079	847.247	2008.99	869.129	1.20888	3.17069e-19	8.02785e-18	Rab3gap1	1	127868773	127943868	+	11739	protein_coding	RAB3 GTPase activating protein subunit 1 [Source:MGI Symbol;Acc:MGI:2445001]	-
ENSMUSG00000040263	578.42	583.461	550.946	556.192	467.461	666.055	217.546	267.783	298.091	271.326	263.622	277.562	567.089	265.988	1.09276	3.22321e-19	8.15185e-18	Klhdc4	8	121796313	121829569	-	3708	protein_coding	kelch domain containing 4 [Source:MGI Symbol;Acc:MGI:2384569]	-
ENSMUSG00000038065	274.604	313.862	117.415	138.071	94.4869	158.259	1237.02	1718.28	1584.33	2723.36	819.657	1083.86	182.783	1527.75	-3.06082	3.33744e-19	8.42398e-18	Mturn	6	54681624	54703851	+	5695	protein_coding	maturin, neural progenitor differentiation regulator homolog (Xenopus) [Source:MGI Symbol;Acc:MGI:1915485]	-
ENSMUSG00000059772	33.1082	44.2625	76.1261	65.1279	59.6759	55.7892	151.855	179.381	202.57	220.015	204.239	191.108	55.6816	191.528	-1.79493	3.33816e-19	8.42398e-18	Slx1b	7	126689468	126695784	-	3521	protein_coding	SLX1 structure-specific endonuclease subunit homolog B (S. cerevisiae) [Source:MGI Symbol;Acc:MGI:1915220]	-
ENSMUSG00000111394	479.096	406.41	239.991	302.193	242.433	257.314	102.374	58.3631	69.9938	89.4053	72.8784	81.9036	321.24	79.1531	2.02259	3.42447e-19	8.63229e-18	AC160637.1	9	59672814	59676700	+	3887	TEC	novel transcript	-
ENSMUSG00000000440	111.01	119.71	89.0288	78.1535	54.7029	33.0181	400.113	530.417	346.675	492.118	348.197	481.411	80.9372	433.155	-2.41601	3.64671e-19	9.18242e-18	Pparg	6	115360951	115490399	+	2953	protein_coding	peroxisome proliferator activated receptor gamma [Source:MGI Symbol;Acc:MGI:97747]	THR-like
ENSMUSG00000031917	1291.22	1284.62	1465.75	1563.07	1297.95	2035.74	627.043	613.67	657.942	551.203	681.098	623.378	1489.72	625.722	1.25142	3.67696e-19	9.24844e-18	Nip7	8	107056877	107060931	+	3130	protein_coding	NIP7, nucleolar pre-rRNA processing protein [Source:MGI Symbol;Acc:MGI:1913414]	-
ENSMUSG00000026785	10.7115	13.0776	2.58054	3.90767	16.1622	10.247	131.381	105.568	55.9951	70.7468	163.751	174.728	9.44775	117.028	-3.61234	3.92806e-19	9.8692e-18	Pkn3	2	30077684	30091022	+	4255	protein_coding	protein kinase N3 [Source:MGI Symbol;Acc:MGI:2388285]	-
ENSMUSG00000041261	25.3181	88.5251	24.5152	28.6563	19.892	42.1266	385.61	415.408	200.923	255.777	312.207	329.435	38.1722	316.56	-3.04259	4.05194e-19	1.01693e-17	Car8	4	8143362	8239041	-	3853	protein_coding	carbonic anhydrase 8 [Source:MGI Symbol;Acc:MGI:88253]	-
ENSMUSG00000030643	110.036	122.728	127.737	166.727	115.622	87.6688	328.451	343.312	482.546	457.133	326.603	335.805	121.753	378.975	-1.64158	4.06581e-19	1.0193e-17	Rab30	7	92741603	92844535	+	9642	protein_coding	RAB30, member RAS oncogene family [Source:MGI Symbol;Acc:MGI:1923235]	-
ENSMUSG00000035245	123.669	143.853	100.641	108.112	116.865	127.518	239.727	247.185	284.093	288.429	296.912	294.853	120.11	275.2	-1.19085	4.08764e-19	1.02365e-17	Eogt	6	97110024	97149182	-	4900	protein_coding	EGF domain-specific O-linked N-acetylglucosamine (GlcNAc) transferase [Source:MGI Symbol;Acc:MGI:2141669]	-
ENSMUSG00000021880	13.6328	11.0656	20.6444	3.90767	8.70274	11.3856	55.4528	66.9459	91.4037	82.4084	69.2794	106.475	11.5565	78.6608	-2.76215	4.18281e-19	1.04634e-17	Rnase6	14	51123908	51132187	+	2667	protein_coding	ribonuclease, RNase A family, 6 [Source:MGI Symbol;Acc:MGI:1925666]	-
ENSMUSG00000019979	1289.27	1296.69	864.482	651.279	767.084	1251.27	239.727	218.861	318.678	341.295	236.63	283.933	1020.01	273.187	1.90093	4.21388e-19	1.05297e-17	Apaf1	10	90989311	91082770	-	9028	protein_coding	apoptotic peptidase activating factor 1 [Source:MGI Symbol;Acc:MGI:1306796]	-
ENSMUSG00000041135	778.043	762.523	731.584	449.382	504.759	1115.78	159.533	161.357	210.805	227.012	169.15	179.278	723.679	184.522	1.97159	4.34406e-19	1.08431e-17	Ripk2	4	16122733	16163647	-	2816	protein_coding	receptor (TNFRSF)-interacting serine-threonine kinase 2 [Source:MGI Symbol;Acc:MGI:1891456]	-
ENSMUSG00000026222	4639.05	4470.52	2967.63	1813.16	2622.01	5317.05	510.166	500.377	903.332	900.273	493.953	577.876	3638.24	647.663	2.48985	4.39773e-19	1.09652e-17	Sp100	1	85649988	85709998	+	7556	protein_coding	nuclear antigen Sp100 [Source:MGI Symbol;Acc:MGI:109561]	SAND
ENSMUSG00000010476	158.725	157.937	114.834	130.256	152.92	114.994	398.407	357.903	282.446	337.408	322.104	397.688	138.278	349.326	-1.33334	4.59811e-19	1.14524e-17	Ebf3	7	137193673	137314445	-	9227	protein_coding	early B cell factor 3 [Source:MGI Symbol;Acc:MGI:894289]	COE
ENSMUSG00000041481	407.037	433.572	988.348	195.384	211.352	376.862	6.82496	27.465	49.4074	7.77438	9.89706	24.5711	435.426	20.99	4.37438	4.78106e-19	1.18951e-17	Serpina3g	12	104236245	104241939	+	2105	protein_coding	serine (or cysteine) peptidase inhibitor, clade A, member 3G [Source:MGI Symbol;Acc:MGI:105046]	-
ENSMUSG00000049625	44.7935	45.2685	16.7735	26.0512	19.892	30.741	117.731	163.073	199.277	127.5	143.957	168.357	30.5866	153.316	-2.30665	4.98318e-19	1.23845e-17	Tifab	13	56173704	56178885	-	3497	protein_coding	TRAF-interacting protein with forkhead-associated domain, family member B [Source:MGI Symbol;Acc:MGI:2385852]	-
ENSMUSG00000030956	222.02	296.76	176.767	197.989	174.055	144.597	701.265	587.922	562.421	776.66	558.734	585.156	202.031	628.693	-1.63526	5.24774e-19	1.30138e-17	Fam53b	7	132712082	132813886	-	6911	protein_coding	family with sequence similarity 53, member B [Source:MGI Symbol;Acc:MGI:1925188]	-
ENSMUSG00000005732	1119.84	1291.66	1154.79	1353.36	1196.01	1752.24	410.351	415.408	531.13	406.6	564.133	587.886	1311.32	485.918	1.43258	5.34805e-19	1.32483e-17	Ranbp1	16	18239784	18248732	-	1666	protein_coding	RAN binding protein 1 [Source:MGI Symbol;Acc:MGI:96269]	-
ENSMUSG00000023307	4541.67	6026.75	5784.29	4235.92	4613.7	5651.79	2335.84	2291.61	1891.48	1903.95	2439.18	2522.63	5142.35	2230.78	1.20503	5.76404e-19	1.42634e-17	2021-03-05	19	37207543	37222139	+	2396	protein_coding	membrane-associated ring finger (C3HC4) 5 [Source:MGI Symbol;Acc:MGI:1915207]	-
ENSMUSG00000050379	56.4788	38.2267	23.2249	20.8409	16.1622	46.6808	192.805	204.271	217.393	218.46	137.659	170.178	33.6024	190.128	-2.48439	5.78785e-19	1.43068e-17	2021-09-06	X	36911326	36991794	-	9882	protein_coding	septin 6 [Source:MGI Symbol;Acc:MGI:1888939]	-
ENSMUSG00000070501	56.4788	113.674	68.3844	28.6563	32.3245	84.2531	0	0.85828	0	0.777438	3.59893	2.73012	63.9619	1.32746	5.63471	6.13783e-19	1.51556e-17	Ifi214	1	173519717	173535957	-	8107	protein_coding	interferon activated gene 214 [Source:MGI Symbol;Acc:MGI:3584522]	-
ENSMUSG00000005958	16.5541	28.1671	9.0319	10.4205	4.97299	15.9398	114.318	109.86	330.206	318.749	200.64	101.014	14.1811	195.798	-3.76953	6.16417e-19	1.52043e-17	Ephb3	16	21204755	21223305	+	6641	protein_coding	Eph receptor B3 [Source:MGI Symbol;Acc:MGI:104770]	-
ENSMUSG00000056708	1576.54	1501.91	1766.38	1413.28	1996.66	1457.35	696.999	622.253	706.526	548.094	842.15	563.315	1618.68	663.223	1.28728	6.20997e-19	1.53008e-17	Ier5	1	155096361	155099636	-	3276	protein_coding	immediate early response 5 [Source:MGI Symbol;Acc:MGI:1337072]	-
ENSMUSG00000104801	52.5837	43.2566	99.3509	95.0867	69.6219	62.6206	0	0	0	0	2.6992	0.91004	70.4201	0.60154	6.94342	6.35274e-19	1.56358e-17	Gm43834	3	18299310	18304139	+	4830	TEC	predicted gene 43834 [Source:MGI Symbol;Acc:MGI:5663971]	-
ENSMUSG00000020253	279.472	358.124	322.568	221.435	206.379	224.295	668.846	796.484	830.868	929.038	639.71	873.639	268.712	789.764	-1.55404	6.60216e-19	1.62185e-17	Ppm1m	9	106194947	106199746	-	2710	protein_coding	protein phosphatase 1M [Source:MGI Symbol;Acc:MGI:1915155]	-
novel.220	140.223	179.062	150.962	118.533	120.595	150.289	47.7747	48.922	61.7593	49.756	52.1845	43.6819	143.277	50.6797	1.50115	6.60362e-19	1.62185e-17	-	18	4353068	4368928	+	1616	-	- && - && -	-
ENSMUSG00000050212	161.646	126.752	110.963	153.702	75.8382	206.079	456.419	496.944	833.338	827.194	572.23	603.357	139.163	631.58	-2.18093	6.6853e-19	1.64015e-17	Eva1b	4	126147744	126149875	+	1942	protein_coding	eva-1 homolog B (C. elegans) [Source:MGI Symbol;Acc:MGI:1922063]	-
ENSMUSG00000020228	388.535	483.87	501.916	571.823	467.461	433.79	254.23	198.263	221.51	200.579	204.239	212.949	474.566	215.295	1.13883	6.77526e-19	1.66045e-17	Helb	10	120083608	120112987	-	5011	protein_coding	helicase (DNA) B [Source:MGI Symbol;Acc:MGI:2152895]	-
ENSMUSG00000006395	96.4034	123.734	109.673	144.584	141.73	149.151	269.586	289.24	371.379	345.96	336.5	357.646	127.546	328.385	-1.36736	7.23446e-19	1.77109e-17	Hyi	4	118359990	118362744	+	2209	polymorphic_pseudogene	hydroxypyruvate isomerase (putative) [Source:MGI Symbol;Acc:MGI:1915430]	-
ENSMUSG00000108621	265.84	195.158	259.345	229.25	210.109	212.91	463.244	491.795	437.256	554.313	457.064	485.961	228.768	481.606	-1.07442	7.61845e-19	1.86117e-17	Gm37494	7	39544402	39580589	+	16543	lincRNA	predicted gene, 37494 [Source:MGI Symbol;Acc:MGI:5610722]	-
ENSMUSG00000058355	3397.49	3122.52	2750.86	2775.75	2687.9	3602.39	1509.17	1506.28	1303.53	1330.97	1723.89	1481.55	3056.15	1475.9	1.05053	7.99265e-19	1.95046e-17	Abce1	8	79683462	79711740	-	6004	protein_coding	ATP-binding cassette, sub-family E (OABP), member 1 [Source:MGI Symbol;Acc:MGI:1195458]	-
ENSMUSG00000106734	2084.84	2841.86	1654.13	889.647	1401.14	2779.21	227.783	254.909	411.728	460.243	373.389	290.303	1941.81	336.393	2.52917	8.36424e-19	2.03897e-17	Gm20559	6	3333194	3346128	-	4690	processed_transcript	predicted gene, 20559 [Source:MGI Symbol;Acc:MGI:5295666]	-
ENSMUSG00000028063	1561.93	1687.01	1788.32	1750.64	1616.22	1333.25	3416.75	3141.31	4412.91	4025.57	3309.22	3105.06	1622.89	3568.47	-1.13699	8.38189e-19	2.04111e-17	Lmna	3	88480147	88509956	-	5838	protein_coding	lamin A [Source:MGI Symbol;Acc:MGI:96794]	-
ENSMUSG00000026358	111.01	109.65	81.2871	61.2202	46.0002	94.5001	0.85312	8.5828	1.64691	10.8841	0.899733	2.73012	83.9447	4.26614	4.28078	8.51848e-19	2.07217e-17	Rgs1	1	144242296	144249242	-	6947	protein_coding	regulator of G-protein signaling 1 [Source:MGI Symbol;Acc:MGI:1354694]	-
ENSMUSG00000039883	28.2394	85.5072	12.9027	11.723	9.94599	47.8193	407.791	581.056	538.541	555.091	325.703	439.549	32.6896	474.622	-3.84836	9.87627e-19	2.39991e-17	Lrrc17	5	21543559	21575904	+	3608	protein_coding	leucine rich repeat containing 17 [Source:MGI Symbol;Acc:MGI:1921761]	-
ENSMUSG00000015312	1963.12	2089.39	1516.07	1501.85	1566.49	1882.03	880.42	790.476	673.588	881.614	768.372	703.461	1753.16	782.989	1.1633	1.00124e-18	2.43042e-17	Gadd45b	10	80930073	80932204	+	1589	protein_coding	growth arrest and DNA-damage-inducible 45 beta [Source:MGI Symbol;Acc:MGI:107776]	-
ENSMUSG00000049672	129.512	123.734	122.576	83.3637	83.2977	144.597	373.667	377.643	312.09	467.24	306.809	309.414	114.513	357.81	-1.64047	1.00862e-18	2.44327e-17	Zbtb14	17	69383050	69391199	+	4680	protein_coding	zinc finger and BTB domain containing 14 [Source:MGI Symbol;Acc:MGI:1195345]	ZBTB
ENSMUSG00000044328	105.167	106.632	165.155	173.24	140.487	122.964	355.751	310.697	417.493	343.628	358.994	376.757	135.608	360.553	-1.41734	1.00866e-18	2.44327e-17	Trp53i13	11	77508099	77515980	-	2157	protein_coding	transformation related protein 53 inducible protein 13 [Source:MGI Symbol;Acc:MGI:1915125]	-
ENSMUSG00000021830	329.135	299.778	292.892	298.286	324.488	270.976	545.997	622.253	601.947	769.663	605.52	579.696	302.592	620.846	-1.03682	1.12199e-18	2.7149e-17	Txndc16	14	45133465	45220328	-	11570	protein_coding	thioredoxin domain containing 16 [Source:MGI Symbol;Acc:MGI:1917811]	-
ENSMUSG00000044350	1553.17	2856.94	1192.21	550.982	850.382	2138.21	124.556	197.404	256.095	203.689	116.066	164.717	1523.65	177.088	3.10493	1.1545e-18	2.79064e-17	Lacc1	14	77024200	77036904	-	3644	protein_coding	laccase domain containing 1 [Source:MGI Symbol;Acc:MGI:2445077]	-
ENSMUSG00000035274	117.826	237.408	134.188	164.122	142.974	281.223	23.8874	26.6067	47.7605	38.0945	35.0896	36.4016	179.624	34.64	2.37427	1.15968e-18	2.8002e-17	Tpbg	9	85842380	85847040	+	3828	protein_coding	trophoblast glycoprotein [Source:MGI Symbol;Acc:MGI:1341264]	-
ENSMUSG00000033207	30.1869	82.4893	36.1276	39.0767	26.1082	42.1266	156.974	237.744	209.982	226.234	197.042	218.41	42.6859	207.731	-2.27495	1.17049e-18	2.82333e-17	Mamdc2	19	23302609	23448322	-	3338	protein_coding	MAM domain containing 2 [Source:MGI Symbol;Acc:MGI:1918988]	-
ENSMUSG00000115902	169.436	115.686	96.7704	88.5739	69.6219	125.241	5.11872	20.5987	17.2926	12.439	9.89706	23.661	110.888	14.8345	2.90755	1.17966e-18	2.84246e-17	AC113595.1	15	79889532	79893120	+	3589	antisense	novel transcript, antisense to Apobec3	-
ENSMUSG00000031584	3200.79	2675.87	1932.83	1896.52	1869.85	4312.85	696.999	678.9	806.988	725.349	649.607	635.208	2648.12	698.842	1.92205	1.21801e-18	2.93178e-17	Gsr	8	33652523	33698163	+	2754	protein_coding	glutathione reductase [Source:MGI Symbol;Acc:MGI:95804]	-
ENSMUSG00000032311	47.7148	58.3461	25.8054	50.7998	41.0272	39.8494	268.733	401.675	191.865	303.201	127.762	219.32	43.9238	252.093	-2.51686	1.228e-18	2.94964e-17	Nrg4	9	55220222	55326844	-	6075	protein_coding	neuregulin 4 [Source:MGI Symbol;Acc:MGI:1933833]	-
ENSMUSG00000028917	1364.25	1531.08	1273.5	1705.05	1248.22	1218.25	667.14	609.379	762.521	691.92	681.098	620.647	1390.06	672.118	1.04815	1.28793e-18	3.08391e-17	Plekhm2	4	141625734	141664899	-	5186	protein_coding	pleckstrin homology domain containing, family M (with RUN domain) member 2 [Source:MGI Symbol;Acc:MGI:1916832]	-
ENSMUSG00000022358	11674.5	6887.85	12258.9	13174.1	17073.5	8794.2	2456.99	2965.36	868.747	2027.56	2231.34	2175	11643.8	2120.83	2.45687	1.30745e-18	3.12738e-17	Fbxo32	15	58175879	58214932	-	6976	protein_coding	F-box protein 32 [Source:MGI Symbol;Acc:MGI:1914981]	-
ENSMUSG00000020120	2703.19	4265.3	1544.46	1116.29	1198.49	3249.44	258.495	336.446	443.02	320.304	186.245	262.092	2346.19	301.1	2.962	1.30996e-18	3.13013e-17	Plek	11	16971206	17052381	-	4486	protein_coding	pleckstrin [Source:MGI Symbol;Acc:MGI:1860485]	-
ENSMUSG00000003812	147.04	116.692	130.317	188.871	119.352	152.566	290.061	418.841	477.605	477.347	418.376	383.127	142.473	410.893	-1.52989	1.39182e-18	3.31881e-17	Dnase2a	8	84908560	84922915	+	5389	protein_coding	deoxyribonuclease II alpha [Source:MGI Symbol;Acc:MGI:1329019]	-
ENSMUSG00000011179	19004.1	17185.9	24022.3	28746.1	30353.9	20840.1	8809.32	8764.76	9381.65	6518.82	6509.57	7944.65	23358.8	7988.13	1.548	1.43694e-18	3.42285e-17	Odc1	12	17544794	17551505	+	3405	protein_coding	ornithine decarboxylase, structural 1 [Source:MGI Symbol;Acc:MGI:97402]	-
ENSMUSG00000098923	643.663	521.091	583.203	545.772	581.84	847.085	270.439	268.642	274.211	250.335	276.218	269.372	620.442	268.203	1.21046	1.45535e-18	3.4631e-17	Tmem185b	1	119526160	119528983	+	2824	protein_coding	transmembrane protein 185B [Source:MGI Symbol;Acc:MGI:1917634]	-
ENSMUSG00000040289	11.6853	23.1372	34.8373	37.7742	27.3515	37.5723	201.336	178.522	115.284	120.503	280.717	201.119	28.7263	182.914	-2.68142	1.54111e-18	3.66336e-17	Hey1	3	8663359	8667256	-	3265	protein_coding	hairy/enhancer-of-split related with YRPW motif 1 [Source:MGI Symbol;Acc:MGI:1341800]	bHLH
ENSMUSG00000024300	58.4263	76.4535	36.1276	48.1946	24.865	38.7109	205.602	253.193	362.321	309.42	158.353	262.092	47.1296	258.497	-2.44734	1.55353e-18	3.68907e-17	Myo1f	17	33555719	33607764	+	4914	protein_coding	myosin IF [Source:MGI Symbol;Acc:MGI:107711]	-
ENSMUSG00000024339	2484.09	2098.45	1806.38	1315.58	1536.66	2792.88	439.357	460.896	662.059	705.136	451.666	411.338	2005.67	521.742	1.94257	1.57186e-18	3.72873e-17	Tap2	17	34203527	34216321	+	3781	protein_coding	transporter 2, ATP-binding cassette, sub-family B (MDR/TAP) [Source:MGI Symbol;Acc:MGI:98484]	-
ENSMUSG00000002083	46.741	45.2685	28.386	41.6819	32.3245	29.6024	135.646	116.726	134.223	115.061	120.564	97.3743	37.334	119.933	-1.67373	1.64139e-18	3.88964e-17	Bbc3	7	16308393	16318205	+	2124	protein_coding	BCL2 binding component 3 [Source:MGI Symbol;Acc:MGI:2181667]	-
ENSMUSG00000028988	190.859	165.984	162.574	226.645	165.352	169.645	485.425	371.635	363.968	386.387	469.661	425.899	180.177	417.162	-1.21169	1.64715e-18	3.89928e-17	Ctnnbip1	4	149518236	149566437	+	2792	protein_coding	catenin beta interacting protein 1 [Source:MGI Symbol;Acc:MGI:1915756]	-
ENSMUSG00000027074	11923.8	12185.3	7669.38	5925.34	7383.65	15815.7	1339.4	1877.92	2227.45	3004.02	1444.07	1916.54	10150.5	1968.23	2.36656	1.65349e-18	3.91026e-17	Slc43a3	2	84936579	84958509	+	4464	protein_coding	solute carrier family 43, member 3 [Source:MGI Symbol;Acc:MGI:1931054]	-
ENSMUSG00000090698	1610.62	1275.57	1397.36	1401.55	1107.73	939.308	340.395	180.239	66.7	79.2987	96.2714	78.2635	1288.69	140.195	3.20052	1.72586e-18	4.07718e-17	Apold1	6	134981718	134986836	+	3567	protein_coding	apolipoprotein L domain containing 1 [Source:MGI Symbol;Acc:MGI:2685921]	-
ENSMUSG00000064289	1181.18	1285.63	1067.06	1016	942.382	1310.48	589.506	535.567	545.952	441.585	496.653	570.595	1133.79	529.976	1.09806	1.81609e-18	4.28594e-17	Tank	2	61578585	61654171	+	6096	protein_coding	TRAF family member-associated Nf-kappa B activator [Source:MGI Symbol;Acc:MGI:107676]	-
ENSMUSG00000042548	999.09	985.847	876.095	903.975	993.356	1138.56	476.894	453.172	433.962	575.304	376.088	429.539	982.82	457.493	1.10284	2.00359e-18	4.72356e-17	Asxl1	2	153345829	153404007	+	7444	protein_coding	additional sex combs like 1 [Source:MGI Symbol;Acc:MGI:2684063]	-
ENSMUSG00000058099	92.5083	119.71	49.0303	52.1023	60.9192	61.482	273.852	380.218	510.543	472.682	253.725	324.884	72.6254	369.317	-2.33935	2.10879e-18	4.96647e-17	Nfam1	15	82992973	83033306	-	7970	protein_coding	Nfat activating molecule with ITAM motif 1 [Source:MGI Symbol;Acc:MGI:1921289]	-
ENSMUSG00000013698	848.155	790.69	361.276	371.229	292.163	672.886	2489.4	2840.05	3147.25	3395.85	2446.37	2508.07	556.067	2804.5	-2.33319	2.16088e-18	5.08394e-17	Pea15a	1	172196728	172206804	-	3861	protein_coding	phosphoprotein enriched in astrocytes 15A [Source:MGI Symbol;Acc:MGI:104799]	-
ENSMUSG00000046434	5213.57	5592.17	5095.28	5529.36	4904.62	6897.37	2433.95	2418.63	2971.03	3055.33	2499.46	2781.99	5538.73	2693.4	1.04009	2.22494e-18	5.2293e-17	Hnrnpa1	15	103240432	103246692	+	3153	protein_coding	heterogeneous nuclear ribonucleoprotein A1 [Source:MGI Symbol;Acc:MGI:104820]	-
ENSMUSG00000015224	19.4754	27.1611	10.3222	19.5384	13.6757	10.247	90.4307	88.4029	73.2877	125.945	74.6778	83.7237	16.7366	89.4113	-2.40175	2.24395e-18	5.26856e-17	Cyp2j9	4	96568429	96591578	-	3337	protein_coding	cytochrome P450, family 2, subfamily j, polypeptide 9 [Source:MGI Symbol;Acc:MGI:1921769]	-
ENSMUSG00000006724	86.6657	61.364	39.9984	31.2614	50.9732	110.44	0	0	2.47037	1.55488	0.899733	6.37028	63.4504	1.88254	5.09731	2.24989e-18	5.27711e-17	Cyp27b1	10	127048250	127053006	+	2574	protein_coding	cytochrome P450, family 27, subfamily b, polypeptide 1 [Source:MGI Symbol;Acc:MGI:1098274]	-
ENSMUSG00000020492	64.2689	68.4057	51.6109	62.5228	46.0002	69.4519	147.59	172.514	148.222	160.152	167.35	137.416	60.3767	155.541	-1.35876	2.29065e-18	5.36724e-17	Ska2	11	87109234	87124635	+	3272	protein_coding	spindle and kinetochore associated complex subunit 2 [Source:MGI Symbol;Acc:MGI:1913390]	-
ENSMUSG00000034673	262.918	279.659	289.021	302.193	329.461	235.681	494.81	537.283	592.066	605.624	572.23	621.557	283.156	570.595	-1.01273	2.40629e-18	5.63243e-17	Pbx2	17	34591266	34597400	+	3640	protein_coding	pre B cell leukemia homeobox 2 [Source:MGI Symbol;Acc:MGI:1341793]	Homeobox
ENSMUSG00000069662	6172.74	8872.62	6555.87	6637.83	5973.81	8160.03	3584.81	3274.34	3362.17	3087.98	3361.4	3452.69	7062.15	3353.9	1.07437	2.45016e-18	5.72928e-17	Marcks	10	37133375	37138920	-	4048	protein_coding	myristoylated alanine rich protein kinase C substrate [Source:MGI Symbol;Acc:MGI:96907]	-
ENSMUSG00000059796	13591.9	11304	9287.38	9498.25	9058.31	16301.8	3855.25	3991.86	4636.06	4677.07	3797.77	3730.25	11507	4114.71	1.48366	2.69816e-18	6.30275e-17	Eif4a1	11	69666936	69672423	-	4334	protein_coding	eukaryotic translation initiation factor 4A1 [Source:MGI Symbol;Acc:MGI:95303]	-
ENSMUSG00000034343	3061.54	2816.71	3029.56	3261.6	3129.26	3789.11	1306.98	1228.2	1201.42	899.496	1614.12	1473.36	3181.3	1287.26	1.30553	2.74065e-18	6.39551e-17	Ube2f	1	91250304	91290337	+	8842	protein_coding	ubiquitin-conjugating enzyme E2F (putative) [Source:MGI Symbol;Acc:MGI:1915171]	-
ENSMUSG00000060550	1379.83	1799.67	1578	767.207	877.733	1329.83	202.189	361.336	234.685	118.948	130.461	262.092	1288.71	218.285	2.56209	2.89693e-18	6.75332e-17	H2-Q7	17	35439155	35443773	+	4265	protein_coding	histocompatibility 2, Q region locus 7 [Source:MGI Symbol;Acc:MGI:95936]	-
ENSMUSG00000047603	51.6099	58.3461	64.5136	46.8921	52.2164	52.3736	162.093	130.459	157.28	152.378	119.665	135.596	54.3253	142.912	-1.39654	3.03617e-18	7.07073e-17	Zfp235	7	24134169	24143241	+	6025	protein_coding	zinc finger protein 235 [Source:MGI Symbol;Acc:MGI:1929117]	zf-C2H2
ENSMUSG00000026341	8307.25	9276.02	6642.32	6086.85	5416.83	9594.61	2780.32	2761.09	3268.3	2919.28	2702.8	2682.8	7553.98	2852.43	1.40513	3.21568e-18	7.48117e-17	Actr3	1	125392905	125435727	-	4631	protein_coding	ARP3 actin-related protein 3 [Source:MGI Symbol;Acc:MGI:1921367]	-
ENSMUSG00000032122	14.6066	18.1074	5.16109	26.0512	6.21624	10.247	81.8995	104.71	105.402	76.9663	72.8784	77.3534	13.3982	86.5351	-2.68515	3.27878e-18	7.62025e-17	Slc37a2	9	37227585	37255738	-	6643	protein_coding	solute carrier family 37 (glycerol-3-phosphate transporter), member 2 [Source:MGI Symbol;Acc:MGI:1929693]	-
ENSMUSG00000049988	866.657	1239.35	877.385	649.976	599.246	1217.12	135.646	191.396	302.209	257.332	193.443	182.918	908.288	210.491	2.10925	3.36131e-18	7.80415e-17	Lrrc25	8	70616155	70621483	+	2039	protein_coding	leucine rich repeat containing 25 [Source:MGI Symbol;Acc:MGI:2445284]	-
ENSMUSG00000030737	282.394	244.45	161.284	79.456	150.433	256.175	806.199	1271.97	1023.56	1229.13	744.079	1083.86	195.699	1026.47	-2.38823	3.45666e-18	8.01743e-17	Slco2b1	7	99657804	99711340	-	5958	protein_coding	solute carrier organic anion transporter family, member 2b1 [Source:MGI Symbol;Acc:MGI:1351872]	-
ENSMUSG00000030609	1336.99	1255.45	1144.47	1178.81	1169.9	1425.47	653.49	548.441	592.889	516.219	728.784	659.779	1251.85	616.6	1.02254	3.76738e-18	8.72047e-17	Aen	7	78895854	78911209	+	5801	protein_coding	apoptosis enhancing nuclease [Source:MGI Symbol;Acc:MGI:1915298]	-
ENSMUSG00000030966	948.454	1043.19	787.066	433.752	620.381	1131.72	139.059	168.223	208.335	266.661	163.751	187.468	827.427	188.916	2.13087	3.78691e-18	8.75686e-17	Trim21	7	102557921	102565486	-	3714	protein_coding	tripartite motif-containing 21 [Source:MGI Symbol;Acc:MGI:106657]	-
ENSMUSG00000060950	446.961	394.339	292.892	360.809	289.677	568.139	134.793	127.025	128.459	135.274	120.564	95.5542	392.136	123.612	1.66598	4.27527e-18	9.86623e-17	Trmt61a	12	111678105	111683902	+	2433	protein_coding	tRNA methyltransferase 61A [Source:MGI Symbol;Acc:MGI:2443487]	-
ENSMUSG00000034854	55.505	34.2029	32.2568	28.6563	29.838	62.6206	213.28	236.027	249.507	293.871	133.161	147.427	40.5132	212.212	-2.38273	4.42822e-18	1.02089e-16	Mfsd12	10	81357491	81366225	+	3971	protein_coding	major facilitator superfamily domain containing 12 [Source:MGI Symbol;Acc:MGI:3604804]	-
ENSMUSG00000036565	128.538	127.758	72.2552	72.9432	43.5137	60.3434	359.164	458.322	522.072	585.411	332.901	354.916	84.2252	435.464	-2.36422	4.56395e-18	1.05113e-16	Ttyh3	5	140620578	140649031	-	5684	protein_coding	tweety family member 3 [Source:MGI Symbol;Acc:MGI:1925589]	-
ENSMUSG00000013275	2770.38	2688.95	2168.95	1772.78	2266.44	1675.95	966.585	819.658	658.766	754.115	932.124	862.718	2223.91	832.327	1.41832	5.01927e-18	1.15483e-16	Slc41a1	1	131827493	131848865	+	4912	protein_coding	solute carrier family 41, member 1 [Source:MGI Symbol;Acc:MGI:2444823]	-
ENSMUSG00000054905	181.122	59.352	61.9331	39.0767	60.9192	385.97	0.85312	3.43312	0	0	0	0.91004	131.395	0.866047	7.26173	5.11606e-18	1.17593e-16	Stfa3	16	36450537	36455392	-	412	protein_coding	stefin A3 [Source:MGI Symbol;Acc:MGI:106196]	-
ENSMUSG00000082976	36.0295	25.1492	32.2568	28.6563	24.865	47.8193	0	0	0	0	0	0	32.4627	0	7.69513	5.21738e-18	1.19801e-16	Gm15056	8	20900606	20902627	-	558	protein_coding	predicted gene 15056 [Source:MGI Symbol;Acc:MGI:3705859]	-
ENSMUSG00000029033	279.472	258.533	233.539	221.435	212.595	265.283	539.172	503.811	781.461	686.478	508.349	654.319	245.143	612.265	-1.31893	5.35733e-18	1.22892e-16	Acap3	4	155891822	155907251	+	5367	protein_coding	ArfGAP with coiled-coil, ankyrin repeat and PH domains 3 [Source:MGI Symbol;Acc:MGI:2153589]	-
ENSMUSG00000006586	25.3181	22.1313	12.9027	14.3281	6.21624	14.8012	95.5495	96.9857	109.52	131.387	69.2794	72.8032	15.9496	95.9208	-2.56525	5.78306e-18	1.32525e-16	Runx1t1	4	13743436	13893649	+	7959	protein_coding	runt-related transcription factor 1; translocated to, 1 (cyclin D-related) [Source:MGI Symbol;Acc:MGI:104793]	-
ENSMUSG00000062098	270.709	238.414	118.705	213.619	186.487	173.06	638.987	576.764	518.778	757.224	607.32	678.89	200.166	629.661	-1.65034	6.39253e-18	1.46346e-16	Btbd3	2	138256565	138589292	+	5776	protein_coding	BTB (POZ) domain containing 3 [Source:MGI Symbol;Acc:MGI:2385155]	-
ENSMUSG00000022246	754.673	584.467	443.854	514.51	385.407	699.073	189.393	172.514	184.454	227.789	167.35	166.537	563.664	184.673	1.61038	6.77046e-18	1.54843e-16	Rai14	15	10568969	10714624	-	8462	protein_coding	retinoic acid induced 14 [Source:MGI Symbol;Acc:MGI:1922896]	-
ENSMUSG00000043587	17.5279	25.1492	10.3222	7.81535	3.72975	12.5241	117.731	84.1115	174.573	159.375	105.269	70.9831	12.8447	118.674	-3.18099	7.46299e-18	1.70512e-16	Pxylp1	9	96823336	96892669	-	6148	protein_coding	2-phosphoxylose phosphatase 1 [Source:MGI Symbol;Acc:MGI:2442444]	-
ENSMUSG00000050022	9.73772	4.02387	3.87082	13.0256	2.4865	7.96989	40.9498	48.0637	57.642	61.4176	53.984	77.3534	6.85239	56.5684	-3.04405	7.47713e-18	1.70665e-16	Amz1	5	140724127	140761439	+	6697	protein_coding	archaelysin family metallopeptidase 1 [Source:MGI Symbol;Acc:MGI:2442258]	-
ENSMUSG00000079597	39.9246	48.2864	39.9984	35.1691	34.811	36.4338	0	0.85828	0	0	0	0	39.1039	0.143047	7.48477	7.67129e-18	1.74922e-16	Gm5483	16	36184212	36188111	+	1862	protein_coding	predicted gene 5483 [Source:MGI Symbol;Acc:MGI:3645124]	-
ENSMUSG00000045064	11.6853	18.1074	15.4833	28.6563	38.5407	19.3554	118.584	111.576	144.105	173.369	91.7728	95.5542	21.9714	122.493	-2.4947	9.17551e-18	2.08807e-16	Zc2hc1c	12	85288591	85299358	+	4482	protein_coding	zinc finger, C2HC-type containing 1C [Source:MGI Symbol;Acc:MGI:1919600]	-
ENSMUSG00000086584	6.8164	11.0656	5.16109	19.5384	13.6757	6.83133	132.234	109.002	54.3482	60.6401	152.955	199.299	10.5148	118.079	-3.4997	9.65872e-18	2.19585e-16	Gm12002	11	12314514	12351028	+	2757	antisense	predicted gene 12002 [Source:MGI Symbol;Acc:MGI:3651521]	-
novel.318	347.636	360.136	220.637	178.45	228.758	655.808	13.6499	24.0318	45.2901	58.3078	15.2955	15.4707	331.904	28.6743	3.5288	1.05243e-17	2.39027e-16	-	4	12131989	12138953	+	2592	-	- && - && -	-
ENSMUSG00000038042	76.928	72.4296	54.1914	71.6407	90.7571	92.223	184.274	204.271	214.922	203.689	179.047	261.182	76.3616	207.897	-1.44283	1.05974e-17	2.40448e-16	Ptpdc1	13	48577872	48625664	-	5151	protein_coding	protein tyrosine phosphatase domain containing 1 [Source:MGI Symbol;Acc:MGI:2145430]	-
ENSMUSG00000030148	48.6886	80.4773	70.965	52.1023	19.892	70.5904	237.167	279.799	275.858	345.96	208.738	280.292	57.1193	271.303	-2.24518	1.12486e-17	2.54971e-16	Clec4a2	6	123106428	123143999	+	2926	protein_coding	C-type lectin domain family 4, member a2 [Source:MGI Symbol;Acc:MGI:1349412]	-
ENSMUSG00000036986	2927.16	2918.31	1825.73	1147.55	1514.28	3260.82	295.18	347.604	564.068	557.423	248.326	312.144	2265.64	387.457	2.54764	1.21544e-17	2.75233e-16	Pml	9	58218076	58249786	-	5571	protein_coding	promyelocytic leukemia [Source:MGI Symbol;Acc:MGI:104662]	-
ENSMUSG00000057894	57.4525	61.364	34.8373	44.287	47.2434	37.5723	140.765	137.325	120.225	128.277	145.757	161.987	47.1261	139.056	-1.54861	1.25464e-17	2.83829e-16	Zfp329	7	12804977	12818858	-	6732	protein_coding	zinc finger protein 329 [Source:MGI Symbol;Acc:MGI:1921283]	zf-C2H2
ENSMUSG00000046574	130.485	118.704	68.3844	88.5739	92.0004	150.289	400.966	419.699	536.07	650.715	305.909	358.556	108.073	445.319	-2.03951	1.27151e-17	2.8736e-16	Prr12	7	45027563	45052881	-	7185	protein_coding	proline rich 12 [Source:MGI Symbol;Acc:MGI:2679002]	-
ENSMUSG00000000182	181.122	112.668	59.3525	27.3537	41.0272	182.169	0	5.14968	1.64691	0	0	0.91004	100.615	1.28444	6.29795	1.40585e-17	3.17409e-16	Fgf23	6	127072902	127081408	+	1814	protein_coding	fibroblast growth factor 23 [Source:MGI Symbol;Acc:MGI:1891427]	-
ENSMUSG00000020810	719.617	739.385	594.815	505.392	554.489	1386.76	2134.51	3131.01	3773.9	3964.16	3383.9	3800.33	750.077	3364.63	-2.16499	1.42205e-17	3.20751e-16	Cygb	11	116645595	116654313	-	2331	protein_coding	cytoglobin [Source:MGI Symbol;Acc:MGI:2149481]	-
ENSMUSG00000010086	1.94754	5.02983	0	3.90767	0	0	63.1309	53.2134	188.572	153.933	48.5856	50.9622	1.81417	93.0661	-5.63612	1.42356e-17	3.20778e-16	Rnf112	11	61448442	61454131	-	3923	protein_coding	ring finger protein 112 [Source:MGI Symbol;Acc:MGI:106611]	-
ENSMUSG00000031903	137.302	139.829	59.3525	139.374	101.946	159.398	449.594	533.85	789.695	830.304	397.682	478.681	122.867	579.968	-2.23706	1.45296e-17	3.2708e-16	Pla2g15	8	106150399	106164715	+	3013	protein_coding	phospholipase A2, group XV [Source:MGI Symbol;Acc:MGI:2178076]	-
ENSMUSG00000021367	873.473	1441.55	525.141	505.392	549.516	1390.18	81.8995	86.6863	129.283	206.021	62.9813	76.4434	880.875	107.219	3.03741	1.51402e-17	3.40491e-16	Edn1	13	42301476	42307990	+	2139	protein_coding	endothelin 1 [Source:MGI Symbol;Acc:MGI:95283]	-
ENSMUSG00000055994	259.997	291.73	252.893	96.3893	171.568	236.82	58.0122	27.465	32.9383	22.5457	20.6939	43.6819	218.233	34.2228	2.67532	1.52348e-17	3.42284e-16	Nod2	8	88647315	88688474	+	5014	protein_coding	nucleotide-binding oligomerization domain containing 2 [Source:MGI Symbol;Acc:MGI:2429397]	-
ENSMUSG00000091144	129.512	181.074	113.544	52.1023	105.676	138.904	6.82496	18.8822	20.5864	14.7713	25.1925	18.2008	120.135	17.4097	2.79193	1.55937e-17	3.50004e-16	Phf11c	14	59380833	59395381	-	3459	protein_coding	PHD finger protein 11C [Source:MGI Symbol;Acc:MGI:3648476]	-
ENSMUSG00000001156	866.657	1094.49	576.752	388.162	519.678	678.579	151.002	171.656	114.461	159.375	166.451	202.939	687.387	160.981	2.09567	1.57029e-17	3.5211e-16	Mxd1	6	86647042	86669161	-	7072	protein_coding	MAX dimerization protein 1 [Source:MGI Symbol;Acc:MGI:96908]	bHLH
ENSMUSG00000022247	939.69	945.609	1152.21	1182.72	1196.01	1308.2	518.697	492.653	561.598	432.255	578.528	570.595	1120.74	525.721	1.09185	1.57624e-17	3.53099e-16	Brix1	15	10474779	10485947	-	2731	protein_coding	BRX1, biogenesis of ribosomes [Source:MGI Symbol;Acc:MGI:1915082]	-
ENSMUSG00000021306	53.5574	62.3699	28.386	20.8409	26.1082	37.5723	156.121	187.963	181.161	193.582	147.556	149.247	38.1391	169.272	-2.1324	1.68522e-17	3.76777e-16	Gpr137b	13	13357620	13394014	-	5026	protein_coding	G protein-coupled receptor 137B [Source:MGI Symbol;Acc:MGI:1891463]	-
ENSMUSG00000022330	15.5803	25.1492	16.7735	27.3537	8.70274	4.55422	113.465	126.167	112.814	107.286	70.1792	140.146	16.3523	111.676	-2.77131	1.71498e-17	3.83057e-16	Osr2	15	35296098	35303305	+	3623	protein_coding	odd-skipped related 2 [Source:MGI Symbol;Acc:MGI:1930813]	zf-C2H2
ENSMUSG00000033987	53.5574	107.638	39.9984	49.4972	53.4597	93.3615	5.97184	9.44108	9.05803	9.32925	1.79947	4.5502	66.2521	6.69165	3.29953	1.74583e-17	3.89567e-16	Dnah17	11	118021723	118130634	-	16126	protein_coding	dynein, axonemal, heavy chain 17 [Source:MGI Symbol;Acc:MGI:1917176]	-
ENSMUSG00000030674	9.73772	11.0656	3.87082	16.9333	4.97299	27.3253	121.143	232.594	134.223	80.0761	91.7728	133.776	12.3176	132.264	-3.4208	1.80797e-17	4.03042e-16	Qprt	7	127107114	127122226	-	2645	protein_coding	quinolinate phosphoribosyltransferase [Source:MGI Symbol;Acc:MGI:1914625]	-
ENSMUSG00000028005	42.8459	41.2446	29.6763	52.1023	19.892	13.6627	249.964	202.554	149.046	123.613	223.134	208.399	33.2373	192.785	-2.53311	1.81113e-17	4.03355e-16	Gucy1b1	3	82032006	82074689	-	3927	protein_coding	guanylate cyclase 1, soluble, beta 1 [Source:MGI Symbol;Acc:MGI:1860604]	-
ENSMUSG00000036225	210.335	269.599	145.801	143.281	135.514	173.06	58.0122	29.1815	37.879	43.5365	55.7835	37.3116	179.598	43.6174	2.0454	1.88764e-17	4.19986e-16	Kctd1	18	14968685	15151446	-	3587	protein_coding	potassium channel tetramerisation domain containing 1 [Source:MGI Symbol;Acc:MGI:1918269]	-
ENSMUSG00000006281	315.502	377.237	298.053	416.819	359.299	329.043	620.218	692.632	679.352	803.871	681.098	723.482	349.325	700.109	-1.00376	1.9159e-17	4.2586e-16	Tep1	14	50824059	50870560	-	9568	protein_coding	telomerase associated protein 1 [Source:MGI Symbol;Acc:MGI:109573]	-
ENSMUSG00000054057	4.86886	4.02387	6.45136	9.1179	16.1622	11.3856	69.1027	60.0796	91.4037	104.954	47.6859	54.6024	8.6683	71.3047	-3.06658	2.12733e-17	4.724e-16	A930004D18Rik	2	18025193	18037737	-	3378	protein_coding	RIKEN cDNA A930004D18 gene [Source:MGI Symbol;Acc:MGI:1925190]	-
ENSMUSG00000027075	2708.06	2381.12	4704.33	4934.09	5692.83	2556.06	898.336	1059.98	993.913	1006.78	1033.79	933.701	3829.42	987.75	1.95471	2.15465e-17	4.78003e-16	Slc43a1	2	84838850	84863594	+	5716	protein_coding	solute carrier family 43, member 1 [Source:MGI Symbol;Acc:MGI:1931352]	-
ENSMUSG00000037548	12.659	30.179	16.7735	6.51279	21.1352	18.2169	68.2496	89.2611	134.223	96.4023	104.369	101.924	17.5794	99.0717	-2.48262	2.17862e-17	4.82854e-16	H2-DMb2	17	34143307	34151553	+	1710	protein_coding	histocompatibility 2, class II, locus Mb2 [Source:MGI Symbol;Acc:MGI:95923]	-
ENSMUSG00000042116	237.6	239.42	219.346	209.712	170.325	145.735	542.584	561.315	413.375	469.572	506.55	543.294	203.69	506.115	-1.31116	2.20147e-17	4.87448e-16	Vwa1	4	155768149	155774698	-	3623	protein_coding	von Willebrand factor A domain containing 1 [Source:MGI Symbol;Acc:MGI:2179729]	-
ENSMUSG00000097328	96.4034	120.716	54.1914	115.928	52.2164	118.41	306.27	386.226	415.846	380.167	441.769	657.049	92.9774	431.221	-2.21037	2.26257e-17	5.00492e-16	Tnfsf12	11	69686250	69695849	-	1515	protein_coding	tumor necrosis factor (ligand) superfamily, member 12 [Source:MGI Symbol;Acc:MGI:1196259]	-
ENSMUSG00000020075	5375.22	4999.65	3167.62	2680.66	2842.07	5899.99	1167.92	1043.67	1121.55	1295.21	769.272	817.216	4160.87	1035.81	2.00615	2.28587e-17	5.05159e-16	Ddx21	10	62580251	62602281	-	5177	protein_coding	DEAD (Asp-Glu-Ala-Asp) box polypeptide 21 [Source:MGI Symbol;Acc:MGI:1860494]	-
ENSMUSG00000058656	2.92131	5.02983	1.29027	1.30256	1.24325	6.83133	57.1591	60.0796	41.9963	71.5243	43.1872	27.3012	3.10309	50.2079	-3.97134	2.41354e-17	5.3286e-16	Samd12	15	53453810	53902537	-	9283	protein_coding	sterile alpha motif domain containing 12 [Source:MGI Symbol;Acc:MGI:2444518]	-
ENSMUSG00000000805	881.263	482.864	878.675	1193.14	910.058	544.23	154.415	114.151	67.5235	73.0792	162.852	218.41	815.039	131.738	2.63013	2.4422e-17	5.3867e-16	Car4	11	84957786	84966044	+	1966	protein_coding	carbonic anhydrase 4 [Source:MGI Symbol;Acc:MGI:1096574]	-
ENSMUSG00000053553	345.689	371.202	353.535	438.962	303.353	428.097	145.884	171.656	195.983	174.146	166.451	150.157	373.473	167.379	1.1568	2.4799e-17	5.4646e-16	3110082I17Rik	5	139359739	139460527	-	2885	protein_coding	RIKEN cDNA 3110082I17 gene [Source:MGI Symbol;Acc:MGI:1920462]	-
ENSMUSG00000043259	44.7935	30.179	25.8054	44.287	18.6487	26.1868	221.811	224.869	239.626	324.192	121.464	102.835	31.6501	205.799	-2.69852	2.50524e-17	5.51514e-16	Fam13c	10	70440481	70558736	+	8263	protein_coding	family with sequence similarity 13, member C [Source:MGI Symbol;Acc:MGI:1918971]	-
ENSMUSG00000056116	5848.47	7126.27	5260.44	3123.53	3706.12	8473.13	1270.3	1441.91	1571.98	1594.52	1291.12	1578.92	5589.66	1458.12	1.93872	2.52009e-17	5.54251e-16	H2-T22	17	36037128	36042747	-	3414	protein_coding	histocompatibility 2, T region locus 22 [Source:MGI Symbol;Acc:MGI:95956]	-
ENSMUSG00000022177	45.7673	64.3819	70.965	56.01	68.3787	52.3736	132.234	169.939	147.399	168.704	144.857	177.458	59.646	156.765	-1.3996	2.60914e-17	5.73286e-16	Haus4	14	54541785	54554616	-	2378	protein_coding	HAUS augmin-like complex, subunit 4 [Source:MGI Symbol;Acc:MGI:1261794]	-
ENSMUSG00000038236	88.6132	106.632	65.8039	66.4304	73.3517	101.331	255.083	278.941	331.853	440.807	259.123	215.68	83.6938	296.915	-1.82273	2.73207e-17	5.99722e-16	Hoxa7	6	52214491	52221854	-	2876	protein_coding	homeobox A7 [Source:MGI Symbol;Acc:MGI:96179]	Homeobox
ENSMUSG00000020424	48.6886	35.2088	29.6763	69.0356	46.0002	20.494	139.059	169.081	196.806	188.14	257.324	240.251	41.5172	198.443	-2.2599	2.74189e-17	6.01302e-16	Castor1	11	4218225	4222409	+	1574	protein_coding	cytosolic arginine sensor for mTORC1 subunit 1 [Source:MGI Symbol;Acc:MGI:1919212]	-
ENSMUSG00000020620	348.61	428.542	261.925	253.999	273.515	280.085	893.217	1150.95	671.941	1117.96	798.963	884.559	307.779	919.598	-1.57712	2.7745e-17	6.07873e-16	Abca8b	11	109932190	109995845	-	7423	protein_coding	ATP-binding cassette, sub-family A (ABC1), member 8b [Source:MGI Symbol;Acc:MGI:1351668]	-
ENSMUSG00000023050	21.423	28.1671	32.2568	20.8409	28.5947	30.741	104.081	88.4029	158.104	122.835	85.4746	90.094	27.0039	108.165	-2.00618	2.86639e-17	6.27407e-16	Map3k12	15	102497646	102517064	-	8989	protein_coding	mitogen-activated protein kinase kinase kinase 12 [Source:MGI Symbol;Acc:MGI:1346881]	-
ENSMUSG00000031904	1339.91	1589.43	1330.27	1288.23	1130.11	1794.36	385.61	315.847	607.711	570.639	340.999	341.265	1412.05	427.012	1.72504	2.91375e-17	6.37164e-16	Slc7a6	8	106168857	106198706	+	4570	protein_coding	solute carrier family 7 (cationic amino acid transporter, y+ system), member 6 [Source:MGI Symbol;Acc:MGI:2142598]	-
ENSMUSG00000030852	21113.3	21137.4	20776	25814.1	27260.7	12617.5	7324.04	6566.7	3652.86	5314.56	7456.09	5156.29	21453.2	5911.76	1.85954	2.92927e-17	6.39947e-16	Tacc2	7	130577438	130764785	+	15408	protein_coding	transforming, acidic coiled-coil containing protein 2 [Source:MGI Symbol;Acc:MGI:1928899]	-
ENSMUSG00000021322	463.515	566.359	420.629	277.445	303.353	508.934	76.7808	121.018	117.754	143.049	82.7754	129.226	423.372	111.767	1.92187	3.13587e-17	6.84431e-16	Aoah	13	20794113	21036617	+	5925	protein_coding	acyloxyacyl hydrolase [Source:MGI Symbol;Acc:MGI:1350928]	-
ENSMUSG00000089999	94.4558	118.704	81.2871	125.046	88.2706	108.163	19.6218	20.5987	34.5852	37.317	28.7915	30.9414	102.654	28.6426	1.8394	3.36531e-17	7.33809e-16	Gm6485	3	104752727	104753165	-	439	transcribed_processed_pseudogene	predicted gene 6485 [Source:MGI Symbol;Acc:MGI:3644007]	-
ENSMUSG00000054893	51.6099	34.2029	47.7401	48.1946	47.2434	51.235	111.759	138.183	107.873	127.5	123.263	131.046	46.7043	123.271	-1.40289	3.41012e-17	7.42874e-16	Zfp667	7	6286579	6307883	+	4755	protein_coding	zinc finger protein 667 [Source:MGI Symbol;Acc:MGI:2442757]	zf-C2H2
ENSMUSG00000032120	310.633	287.706	307.085	407.701	302.109	301.717	629.603	754.428	710.643	586.966	605.52	730.762	319.492	669.654	-1.06908	3.4922e-17	7.60034e-16	C2cd2l	9	44309237	44320285	-	5836	protein_coding	C2 calcium-dependent domain containing 2-like [Source:MGI Symbol;Acc:MGI:1919014]	-
ENSMUSG00000062345	1507.4	1147.81	197.412	153.702	273.515	2109.74	11.0906	24.8901	15.6457	8.55182	1.79947	5.46024	898.263	11.2396	6.31924	3.67024e-17	7.98025e-16	Serpinb2	1	107511423	107535478	+	2349	protein_coding	serine (or cysteine) peptidase inhibitor, clade B, member 2 [Source:MGI Symbol;Acc:MGI:97609]	-
ENSMUSG00000021250	1426.58	1248.4	2639.9	1315.58	1515.52	1362.85	468.363	357.903	256.919	171.036	453.465	280.292	1584.81	331.33	2.25816	3.85813e-17	8.38084e-16	Fos	12	85473890	85477273	+	2352	protein_coding	FBJ osteosarcoma oncogene [Source:MGI Symbol;Acc:MGI:95574]	TF_bZIP
ENSMUSG00000055835	484.938	646.836	567.72	613.505	709.895	692.242	249.964	253.193	265.153	225.457	303.21	328.525	619.189	270.917	1.19302	3.87085e-17	8.40051e-16	Zfp1	8	111643401	111671011	+	2040	protein_coding	zinc finger protein 1 [Source:MGI Symbol;Acc:MGI:99154]	zf-C2H2
ENSMUSG00000035919	69.1378	84.5012	61.9331	82.0611	53.4597	52.3736	174.037	200.838	211.628	202.134	172.749	151.067	67.2444	185.409	-1.46131	4.00388e-17	8.681e-16	Bbs9	9	22475715	22888280	+	6243	protein_coding	Bardet-Biedl syndrome 9 (human) [Source:MGI Symbol;Acc:MGI:2442833]	-
ENSMUSG00000038543	10.7115	14.0835	10.3222	22.1435	11.1892	19.3554	104.081	76.3869	100.462	54.4206	188.944	138.326	14.6342	110.437	-2.91963	4.21411e-17	9.12819e-16	BC028528	3	95883954	95892005	-	1402	protein_coding	cDNA sequence BC028528 [Source:MGI Symbol;Acc:MGI:2385885]	-
ENSMUSG00000040428	1818.03	2198.04	1103.18	524.931	920.004	2211.07	249.964	243.752	254.448	286.097	176.348	224.78	1462.54	239.231	2.61211	4.24742e-17	9.19166e-16	Plekha4	7	45526330	45554229	+	6371	protein_coding	pleckstrin homology domain containing, family A (phosphoinositide binding specific) member 4 [Source:MGI Symbol;Acc:MGI:1916467]	-
ENSMUSG00000042772	1542.45	1761.45	1278.66	1315.58	1387.47	1780.7	774.633	804.209	684.293	747.895	795.364	727.122	1511.05	755.586	1.00057	4.31842e-17	9.3365e-16	Smg7	1	152836995	152902646	-	6341	protein_coding	Smg-7 homolog, nonsense mediated mRNA decay factor (C. elegans) [Source:MGI Symbol;Acc:MGI:2682334]	-
ENSMUSG00000016756	45.7673	78.4654	15.4833	11.723	29.838	70.5904	511.872	710.656	1896.42	2891.29	378.788	322.154	41.9779	1118.53	-4.7314	4.36307e-17	9.42414e-16	Cmah	13	24327404	24477377	+	10660	protein_coding	cytidine monophospho-N-acetylneuraminic acid hydroxylase [Source:MGI Symbol;Acc:MGI:103227]	-
ENSMUSG00000026389	730.329	983.835	761.261	715.104	773.301	729.814	1628.61	1985.2	2420.14	2647.18	1620.42	1759.11	782.274	2010.11	-1.36133	4.54179e-17	9.80095e-16	Steap3	1	120190757	120272705	-	5715	protein_coding	STEAP family member 3 [Source:MGI Symbol;Acc:MGI:1915678]	-
ENSMUSG00000033282	48.6886	56.3341	34.8373	31.2614	37.2975	47.8193	116.877	148.482	161.398	192.027	123.263	128.316	42.7064	145.061	-1.75398	4.6759e-17	1.00809e-15	Rpgrip1l	8	91217030	91313262	-	14688	protein_coding	Rpgrip1-like [Source:MGI Symbol;Acc:MGI:1920563]	-
ENSMUSG00000011263	3.89509	3.0179	1.29027	1.30256	9.94599	0	68.2496	50.6385	50.2309	77.7438	29.6912	55.5125	3.24197	55.3444	-4.09529	4.88814e-17	1.05286e-15	Exoc3l2	7	19463331	19496762	+	4016	protein_coding	exocyst complex component 3-like 2 [Source:MGI Symbol;Acc:MGI:1921713]	-
ENSMUSG00000027544	145.092	223.325	107.093	147.189	92.0004	160.536	441.916	503.811	466.9	527.103	402.181	452.29	145.872	465.7	-1.67084	5.19374e-17	1.11662e-15	Nfatc2	2	168476410	168601657	-	10578	protein_coding	nuclear factor of activated T cells, cytoplasmic, calcineurin dependent 2 [Source:MGI Symbol;Acc:MGI:102463]	RHD
ENSMUSG00000058818	1766.42	2327.81	1780.58	1587.82	1464.55	2260.03	167.212	408.541	557.48	529.435	346.397	497.792	1864.53	417.81	2.15784	5.19392e-17	1.11662e-15	Pirb	7	3711409	3720391	-	4471	protein_coding	paired Ig-like receptor B [Source:MGI Symbol;Acc:MGI:894311]	-
ENSMUSG00000027456	67.1902	64.3819	51.6109	61.2202	59.6759	60.3434	14.503	14.5908	11.5284	17.8811	13.496	23.661	60.7371	15.9434	1.93576	5.22728e-17	1.12274e-15	Sdcbp2	2	151572622	151590005	+	1399	protein_coding	syndecan binding protein (syntenin) 2 [Source:MGI Symbol;Acc:MGI:2385156]	-
ENSMUSG00000023087	1954.36	1967.67	2478.61	2515.24	2500.17	2406.91	665.434	667.742	495.721	513.109	1115.67	815.396	2303.83	712.178	1.69395	5.3585e-17	1.14985e-15	Noct	3	51224447	51251644	+	10658	protein_coding	nocturnin [Source:MGI Symbol;Acc:MGI:109382]	-
ENSMUSG00000043505	218.125	221.313	212.895	222.737	135.514	181.03	72.5152	60.0796	46.1136	24.878	44.9867	53.6924	198.602	50.3776	1.98187	5.56346e-17	1.19271e-15	Gimap5	6	48746197	48754210	+	4149	protein_coding	GTPase, IMAP family member 5 [Source:MGI Symbol;Acc:MGI:2442232]	-
ENSMUSG00000026088	583.289	611.628	459.337	356.901	343.137	676.302	118.584	111.576	186.101	129.832	72.8784	120.125	505.099	123.183	2.03572	5.85729e-17	1.25453e-15	Mitd1	1	37874801	37890411	-	2770	protein_coding	MIT, microtubule interacting and transport, domain containing 1 [Source:MGI Symbol;Acc:MGI:1916278]	-
ENSMUSG00000020611	3382.88	3591.3	2530.22	1995.52	1982.98	2964.8	889.804	1026.5	823.457	1012.22	589.325	683.44	2741.28	837.459	1.71082	5.94858e-17	1.2729e-15	Gna13	11	109362831	109401369	+	6421	protein_coding	guanine nucleotide binding protein, alpha 13 [Source:MGI Symbol;Acc:MGI:95768]	-
ENSMUSG00000029299	11.6853	7.04177	9.0319	18.2358	6.21624	13.6627	43.5091	76.3869	66.7	55.9755	55.7835	74.6233	10.9789	62.1631	-2.5098	6.15286e-17	1.31538e-15	Abcg3	5	104935057	104982718	-	3550	protein_coding	ATP binding cassette subfamily G member 3 [Source:MGI Symbol;Acc:MGI:1351624]	-
ENSMUSG00000026077	124.643	134.8	52.9012	70.3381	75.8382	37.5723	6.82496	7.72452	12.3519	3.88719	9.89706	1.82008	82.682	7.08428	3.54742	6.94727e-17	1.48245e-15	Npas2	1	39193731	39363236	+	4791	protein_coding	neuronal PAS domain protein 2 [Source:MGI Symbol;Acc:MGI:109232]	bHLH
ENSMUSG00000029415	1443.13	1377.17	1001.25	936.539	1029.41	1756.79	458.979	475.487	459.489	519.328	461.563	414.068	1257.38	464.819	1.43608	7.15873e-17	1.52615e-15	Sdad1	5	92284010	92310479	-	6537	protein_coding	SDA1 domain containing 1 [Source:MGI Symbol;Acc:MGI:2140779]	-
ENSMUSG00000056069	49.6624	54.3222	54.1914	32.5639	54.7029	58.0663	110.906	143.333	166.338	196.692	158.353	169.267	50.5849	157.481	-1.63566	7.35257e-17	1.56602e-15	Otulinl	15	27655069	27681579	-	3241	protein_coding	OTU deubiquitinase with linear linkage specificity like [Source:MGI Symbol;Acc:MGI:2687281]	-
ENSMUSG00000062563	91.5345	98.5847	55.4817	74.2458	52.2164	214.048	369.401	611.096	1057.32	1530.78	778.269	826.316	97.6853	862.196	-3.14023	8.02233e-17	1.70709e-15	Cys1	12	24665833	24681813	-	2952	protein_coding	cystin 1 [Source:MGI Symbol;Acc:MGI:2177632]	-
ENSMUSG00000026121	2082.9	2188.98	1538	1030.32	1284.28	1186.37	296.886	222.295	436.432	531.767	274.419	244.801	1551.81	334.433	2.21389	8.06736e-17	1.71508e-15	Sema4c	1	36548639	36558349	-	4593	protein_coding	sema domain, immunoglobulin domain (Ig), transmembrane domain (TM) and short cytoplasmic domain, (semaphorin) 4C [Source:MGI Symbol;Acc:MGI:109252]	-
ENSMUSG00000019122	7848.6	11463	6621.68	7786.69	4975.48	12297.5	1598.75	2537.93	2575.77	2472.25	1856.15	2501.7	8498.83	2257.09	1.91283	8.2588e-17	1.75415e-15	Ccl9	11	83572919	83578636	-	3045	protein_coding	chemokine (C-C motif) ligand 9 [Source:MGI Symbol;Acc:MGI:104533]	-
ENSMUSG00000049112	6.8164	9.0537	6.45136	0	3.72975	2.27711	72.5152	62.6545	41.1728	65.3048	40.488	38.2217	4.72139	53.3928	-3.45504	8.9242e-17	1.89373e-15	Oxtr	6	112473683	112489943	-	4790	protein_coding	oxytocin receptor [Source:MGI Symbol;Acc:MGI:109147]	-
ENSMUSG00000078812	17063.4	16347	19671.5	21157.4	20064.8	22306.6	9626.61	9067.73	9484.58	7484.39	10898.5	10175.2	19435.1	9456.16	1.03934	9.36144e-17	1.98468e-15	Eif5a	11	69916714	69921958	-	2377	protein_coding	eukaryotic translation initiation factor 5A [Source:MGI Symbol;Acc:MGI:106248]	-
ENSMUSG00000036188	77.9017	99.5907	117.415	131.558	133.028	86.5302	236.314	272.075	276.682	271.326	257.324	276.652	107.671	265.062	-1.30723	9.77303e-17	2.07002e-15	Ankmy2	12	36157114	36197291	+	6020	protein_coding	ankyrin repeat and MYND domain containing 2 [Source:MGI Symbol;Acc:MGI:2144755]	-
ENSMUSG00000042515	19.4754	27.1611	28.386	32.5639	14.919	17.0783	184.274	162.215	116.931	72.3017	115.166	95.5542	23.264	124.407	-2.42313	1.03936e-16	2.19944e-15	Mum1l1	X	139210042	139238335	+	4859	protein_coding	melanoma associated antigen (mutated) 1-like 1 [Source:MGI Symbol;Acc:MGI:2445062]	-
ENSMUSG00000036353	14.6066	28.1671	18.0638	3.90767	7.45949	26.1868	109.199	125.309	125.989	157.042	77.377	117.395	16.3986	118.719	-2.8391	1.04639e-16	2.21227e-15	P2ry12	3	59216272	59262871	-	2546	protein_coding	purinergic receptor P2Y, G-protein coupled 12 [Source:MGI Symbol;Acc:MGI:1918089]	-
ENSMUSG00000026011	24.3443	42.2506	77.4163	31.2614	55.9462	69.4519	3.41248	0.85828	4.94074	0	0	0.91004	50.1118	1.68692	4.88042	1.07356e-16	2.26762e-15	Ctla4	1	60887000	60915832	+	2330	protein_coding	cytotoxic T-lymphocyte-associated protein 4 [Source:MGI Symbol;Acc:MGI:88556]	-
ENSMUSG00000032064	43.8197	37.2208	24.5152	36.4716	32.3245	19.3554	128.821	171.656	206.688	300.868	125.963	117.395	32.2845	175.232	-2.43635	1.15557e-16	2.43636e-15	Dixdc1	9	50662752	50739517	-	9971	protein_coding	DIX domain containing 1 [Source:MGI Symbol;Acc:MGI:2679721]	-
ENSMUSG00000038354	12.659	3.0179	15.4833	13.0256	4.97299	14.8012	80.1933	60.0796	128.459	93.2925	65.6805	60.9727	10.66	81.4463	-2.94603	1.20522e-16	2.53637e-15	Ankrd35	3	96670131	96691032	+	4081	protein_coding	ankyrin repeat domain 35 [Source:MGI Symbol;Acc:MGI:2442590]	-
ENSMUSG00000027995	1780.05	2488.76	1274.79	596.571	902.598	2846.39	115.171	149.341	294.798	283.765	109.767	177.458	1648.19	188.383	3.12885	1.21849e-16	2.56196e-15	Tlr2	3	83836272	83841767	-	3014	protein_coding	toll-like receptor 2 [Source:MGI Symbol;Acc:MGI:1346060]	-
ENSMUSG00000030546	587.184	1019.04	709.65	371.229	385.407	261.868	3989.19	5008.07	2919.15	4290.68	2006.4	2835.69	555.73	3508.2	-2.65782	1.24314e-16	2.61138e-15	Plin1	7	79720218	79732903	-	4649	protein_coding	perilipin 1 [Source:MGI Symbol;Acc:MGI:1890505]	-
ENSMUSG00000034652	71.0853	61.364	54.1914	39.0767	43.5137	44.4037	136.499	211.995	271.741	206.798	141.258	227.51	52.2725	199.3	-1.92389	1.30395e-16	2.73662e-15	Cd300a	11	114890041	114904654	+	4738	protein_coding	CD300A molecule [Source:MGI Symbol;Acc:MGI:2443411]	-
ENSMUSG00000020692	484.938	450.673	353.535	474.131	372.975	585.218	200.483	191.396	207.511	175.701	210.538	199.299	453.578	197.488	1.20098	1.33135e-16	2.79157e-15	Nle1	11	82900768	82908411	-	3233	protein_coding	notchless homolog 1 [Source:MGI Symbol;Acc:MGI:2429770]	-
ENSMUSG00000039501	6802.77	8217.74	4225.64	2272.96	3569.37	6202.85	879.567	950.975	1107.55	1393.95	646.908	714.382	5215.22	948.888	2.45838	1.33557e-16	2.79787e-15	Znfx1	2	167035793	167063015	-	8189	protein_coding	zinc finger, NFX1-type containing 1 [Source:MGI Symbol;Acc:MGI:2138982]	-
ENSMUSG00000027394	254.154	255.515	207.734	251.394	247.406	229.988	619.365	525.268	605.241	716.798	474.159	437.729	241.032	563.093	-1.22392	1.33879e-16	2.80205e-15	Ttl	2	129065942	129096283	+	5945	protein_coding	tubulin tyrosine ligase [Source:MGI Symbol;Acc:MGI:1916987]	-
ENSMUSG00000049184	25.3181	30.179	19.3541	32.5639	26.1082	33.0181	81.0464	72.9538	85.6395	105.732	109.767	101.924	27.7569	92.8439	-1.73963	1.40822e-16	2.94469e-15	Purg	8	33386325	33417467	+	1975	protein_coding	purine-rich element binding protein G [Source:MGI Symbol;Acc:MGI:1922279]	-
ENSMUSG00000029060	245.39	253.504	251.603	273.537	272.271	158.259	593.772	584.489	766.638	817.087	556.035	559.675	242.427	646.283	-1.41568	1.48033e-16	3.09265e-15	Mib2	4	155654677	155669198	-	4724	protein_coding	mindbomb E3 ubiquitin protein ligase 2 [Source:MGI Symbol;Acc:MGI:2679684]	-
ENSMUSG00000055413	386.587	450.673	359.986	171.938	220.055	393.94	52.8935	48.922	34.5852	10.1067	32.3904	70.0731	330.53	41.4951	2.99717	1.6381e-16	3.41603e-15	H2-Q5	17	35394126	35397800	+	1591	polymorphic_pseudogene	histocompatibility 2, Q region locus 5 [Source:MGI Symbol;Acc:MGI:95934]	-
ENSMUSG00000042804	248.312	226.342	119.995	109.415	106.919	192.416	580.122	679.758	926.389	719.13	619.916	562.405	167.233	681.287	-2.02229	1.69566e-16	3.53285e-15	Gpr153	4	152274232	152285337	+	3909	protein_coding	G protein-coupled receptor 153 [Source:MGI Symbol;Acc:MGI:1916157]	-
ENSMUSG00000025491	356.4	334.987	349.664	338.665	302.109	301.717	48.6278	50.6385	90.5803	72.3017	103.469	138.326	330.59	83.9906	1.97862	1.74535e-16	3.63309e-15	Ifitm1	7	140967221	140969825	+	1094	protein_coding	interferon induced transmembrane protein 1 [Source:MGI Symbol;Acc:MGI:1915963]	-
ENSMUSG00000026357	22.3967	31.185	12.9027	5.21023	23.6217	31.8796	90.4307	139.9	121.048	137.606	96.2714	137.416	21.1993	120.445	-2.48924	1.77194e-16	3.68509e-15	Rgs18	1	144752683	144775435	-	2031	protein_coding	regulator of G-protein signaling 18 [Source:MGI Symbol;Acc:MGI:1927498]	-
ENSMUSG00000024921	540.443	535.174	639.975	605.689	650.219	457.699	1507.46	1751.75	1959	2741.25	1314.51	1325.93	571.533	1766.65	-1.62872	1.78705e-16	3.71314e-15	Smarca2	19	26605050	26778322	+	14269	protein_coding	SWI/SNF related, matrix associated, actin dependent regulator of chromatin, subfamily a, member 2 [Source:MGI Symbol;Acc:MGI:99603]	-
ENSMUSG00000101389	1136.39	1265.51	594.815	549.679	578.111	1209.15	63.1309	167.365	76.5815	195.137	113.366	189.288	888.941	134.145	2.72868	1.87054e-16	3.88311e-15	Ms4a4a	19	11375523	11392790	+	836	protein_coding	membrane-spanning 4-domains, subfamily A, member 4A [Source:MGI Symbol;Acc:MGI:3643932]	-
ENSMUSG00000021732	3.89509	15.0895	1.29027	6.51279	4.97299	7.96989	82.7527	118.443	75.758	68.4145	36.8891	62.7928	6.62175	74.175	-3.45951	1.90798e-16	3.95726e-15	Fgf10	13	118669791	118792115	+	4601	protein_coding	fibroblast growth factor 10 [Source:MGI Symbol;Acc:MGI:1099809]	-
ENSMUSG00000025494	20.4492	18.1074	5.16109	9.1179	9.94599	11.3856	85.312	78.1035	76.5815	49.756	81.8757	127.406	12.3612	83.1724	-2.7176	2.00521e-16	4.15514e-15	Sigirr	7	141091175	141100572	-	3043	protein_coding	single immunoglobulin and toll-interleukin 1 receptor (TIR) domain [Source:MGI Symbol;Acc:MGI:1344402]	-
ENSMUSG00000074766	366.138	315.873	278.699	342.573	190.217	641.007	42.656	67.8041	88.9334	94.8474	58.4827	55.5125	355.751	68.0393	2.3853	2.02883e-16	4.2003e-15	Ism1	2	139678178	139758581	+	2965	protein_coding	isthmin 1, angiogenesis inhibitor [Source:MGI Symbol;Acc:MGI:2442963]	-
ENSMUSG00000025933	28.2394	25.1492	29.6763	20.8409	33.5677	27.3253	65.6903	86.6863	98.8148	122.835	121.464	104.655	27.4665	100.024	-1.86517	2.12825e-16	4.39819e-15	Tmem14a	1	21218575	21230167	+	1351	protein_coding	transmembrane protein 14A [Source:MGI Symbol;Acc:MGI:1922962]	-
ENSMUSG00000097195	716.696	921.465	1531.55	1581.31	1356.38	1459.63	333.57	394.809	282.446	268.993	392.284	454.11	1261.17	354.369	1.83136	2.2784e-16	4.70425e-15	Snhg5	9	88521050	88522929	-	1730	processed_transcript	small nucleolar RNA host gene 5 [Source:MGI Symbol;Acc:MGI:1919905]	-
ENSMUSG00000002897	1215.27	1459.66	975.446	851.873	898.869	1371.96	163.799	234.311	346.675	445.472	222.234	273.922	1128.85	281.069	2.00556	2.29628e-16	4.73691e-15	Il17ra	6	120463247	120487559	+	8662	protein_coding	interleukin 17 receptor A [Source:MGI Symbol;Acc:MGI:107399]	-
ENSMUSG00000032766	419.696	540.204	592.235	669.515	460.002	524.874	1646.52	1457.36	1548.1	999.008	2198.95	1959.32	534.421	1634.88	-1.61359	2.3358e-16	4.8141e-15	Gng11	6	4003904	4008445	+	919	protein_coding	guanine nucleotide binding protein (G protein), gamma 11 [Source:MGI Symbol;Acc:MGI:1913316]	-
ENSMUSG00000030091	2035.18	1872.1	2101.85	4097.85	2337.31	1373.1	709.796	573.331	334.324	424.481	568.631	543.294	2302.9	525.643	2.13127	2.36027e-16	4.86016e-15	Nup210	6	91013068	91116829	-	10474	protein_coding	nucleoporin 210 [Source:MGI Symbol;Acc:MGI:1859555]	-
ENSMUSG00000045625	13.6328	11.0656	5.16109	10.4205	11.1892	3.41567	43.5091	71.2373	81.5222	88.6279	50.3851	51.8723	9.14748	64.5256	-2.80447	2.41059e-16	4.95932e-15	Pigz	16	31933851	31946046	+	2541	protein_coding	phosphatidylinositol glycan anchor biosynthesis, class Z [Source:MGI Symbol;Acc:MGI:2443822]	-
ENSMUSG00000030768	61.3476	62.3699	38.7082	36.4716	18.6487	61.482	255.936	237.744	533.6	516.996	213.237	208.399	46.5047	327.652	-2.81086	2.43575e-16	5.00661e-15	Disp1	1	183086266	183221522	-	5224	protein_coding	dispatched RND transporter family member 1 [Source:MGI Symbol;Acc:MGI:1916147]	-
ENSMUSG00000035923	10691	8712.68	17279.3	14493.6	18101.7	10666	3246.12	3371.32	2512.37	1549.43	4358.31	3502.74	13324	3090.05	2.10835	2.47609e-16	5.08496e-15	Myf6	10	107492853	107494737	-	1263	protein_coding	myogenic factor 6 [Source:MGI Symbol;Acc:MGI:97253]	bHLH
ENSMUSG00000034792	14.6066	28.1671	19.3541	13.0256	7.45949	12.5241	63.984	94.4108	121.872	101.067	74.6778	71.8932	15.8561	87.9841	-2.45979	2.48302e-16	5.09464e-15	Gna15	10	81502306	81524225	-	2135	protein_coding	guanine nucleotide binding protein, alpha 15 [Source:MGI Symbol;Acc:MGI:95770]	-
ENSMUSG00000022564	6351.91	6782.23	7088.75	5559.32	6810.52	8495.9	3014.93	3037.45	2820.34	3000.91	3377.6	4012.37	6848.1	3210.6	1.09295	2.54275e-16	5.21252e-15	Grina	15	76246764	76249904	+	2067	protein_coding	glutamate receptor, ionotropic, N-methyl D-aspartate-associated protein 1 (glutamate binding) [Source:MGI Symbol;Acc:MGI:1913418]	-
ENSMUSG00000035713	31.1607	43.2566	24.5152	41.6819	33.5677	19.3554	98.1088	89.2611	113.637	108.841	115.166	103.745	32.2562	104.793	-1.69731	2.61208e-16	5.34986e-15	Usp35	7	97309380	97332020	-	5288	protein_coding	ubiquitin specific peptidase 35 [Source:MGI Symbol;Acc:MGI:2685339]	-
ENSMUSG00000025995	943.585	820.869	692.876	739.853	713.625	1038.36	387.317	386.226	366.438	351.402	430.972	404.968	824.862	387.887	1.08982	2.61715e-16	5.35547e-15	Wdr75	1	45795166	45823619	+	4900	protein_coding	WD repeat domain 75 [Source:MGI Symbol;Acc:MGI:1920924]	-
ENSMUSG00000053931	4217.4	4312.58	3856.62	3425.73	3275.96	4376.61	1419.59	1445.34	2252.98	1613.18	1736.48	1833.73	3910.82	1716.89	1.18781	2.6309e-16	5.3788e-15	Cnn3	3	121426497	121458207	+	3037	protein_coding	calponin 3, acidic [Source:MGI Symbol;Acc:MGI:1919244]	-
ENSMUSG00000071713	775.122	819.863	518.689	438.962	460.002	536.26	186.833	227.444	217.393	200.579	151.155	187.468	591.483	195.145	1.60081	2.68152e-16	5.47741e-15	Csf2rb	15	78325752	78353847	+	7277	protein_coding	colony stimulating factor 2 receptor, beta, low-affinity (granulocyte-macrophage) [Source:MGI Symbol;Acc:MGI:1339759]	-
ENSMUSG00000053846	1090.62	1356.04	477.401	221.435	356.812	967.772	14.503	30.8981	16.4691	8.55182	4.49867	0	745.014	12.4868	5.8974	2.75262e-16	5.61765e-15	Lipg	18	74939322	74961263	-	3787	protein_coding	lipase, endothelial [Source:MGI Symbol;Acc:MGI:1341803]	-
ENSMUSG00000019966	479.096	432.566	254.184	231.855	226.271	337.012	1126.97	1119.2	1344.71	2137.95	1064.38	1210.35	326.831	1333.93	-2.02729	2.8325e-16	5.7704e-15	Kitl	10	100015630	100100416	+	5911	protein_coding	kit ligand [Source:MGI Symbol;Acc:MGI:96974]	-
ENSMUSG00000097119	95.4296	50.2983	42.579	56.01	60.9192	39.8494	248.258	199.979	196.806	206.021	186.245	163.807	57.5143	200.186	-1.7925	2.85848e-16	5.81815e-15	B230354K17Rik	17	45433598	45442544	+	6136	bidirectional_promoter_lncRNA	RIKEN cDNA B230354K17 gene [Source:MGI Symbol;Acc:MGI:2443272]	-
ENSMUSG00000057137	528.758	340.017	370.308	282.655	374.218	398.494	143.324	162.215	84.8161	130.61	98.9706	115.575	382.408	122.585	1.64222	2.90494e-16	5.90749e-15	Tmem140	6	34863146	34874946	+	5853	protein_coding	transmembrane protein 140 [Source:MGI Symbol;Acc:MGI:1915737]	-
ENSMUSG00000021947	78.8755	108.644	101.931	87.2714	88.2706	99.0543	255.083	242.893	473.488	477.347	272.619	277.562	94.008	333.165	-1.82611	2.96477e-16	6.02382e-15	Cryl1	14	57274993	57398529	-	2178	protein_coding	crystallin, lambda 1 [Source:MGI Symbol;Acc:MGI:1915881]	-
ENSMUSG00000031722	41352.2	44886.2	34172.9	15467.9	22101.2	21821.6	5229.63	5596.85	5028.03	4810.79	1550.24	1879.23	29967	4015.79	2.8996	3.00672e-16	6.10364e-15	Hp	8	109575128	109579172	-	1606	protein_coding	haptoglobin [Source:MGI Symbol;Acc:MGI:96211]	-
ENSMUSG00000078616	300.895	568.371	112.254	45.5895	68.3787	285.777	8.5312	19.7404	10.7049	10.8841	3.59893	7.28032	230.211	10.1233	4.50619	3.03538e-16	6.15636e-15	Trim30c	7	104382065	104400837	-	1716	protein_coding	tripartite motif-containing 30C [Source:MGI Symbol;Acc:MGI:4821257]	-
ENSMUSG00000053368	1.94754	3.0179	5.16109	5.21023	2.4865	5.69278	55.4528	53.2134	25.5272	31.0975	44.9867	59.1526	3.91934	44.905	-3.54432	3.40335e-16	6.89659e-15	Rxfp2	5	150018675	150082184	+	5690	protein_coding	relaxin/insulin-like family peptide receptor 2 [Source:MGI Symbol;Acc:MGI:2153463]	-
ENSMUSG00000028191	1823.87	1754.41	1407.69	1329.91	1256.92	2151.87	647.518	665.167	706.526	675.593	728.784	745.323	1620.78	694.819	1.22254	3.41997e-16	6.92415e-15	Bcl10	3	145922804	145934356	+	4564	protein_coding	B cell leukemia/lymphoma 10 [Source:MGI Symbol;Acc:MGI:1337994]	-
ENSMUSG00000029664	304.791	432.566	203.863	175.845	165.352	378	59.7184	78.9618	55.9951	60.6401	58.4827	62.7928	276.736	62.7651	2.14276	3.4755e-16	7.03038e-15	Tfpi2	6	3962595	3988919	-	1747	protein_coding	tissue factor pathway inhibitor 2 [Source:MGI Symbol;Acc:MGI:108543]	-
ENSMUSG00000042719	2114.06	1926.43	1073.51	936.539	984.653	1795.5	461.538	417.124	334.324	407.377	313.107	267.552	1471.78	366.837	2.00462	3.5252e-16	7.12462e-15	Naa25	5	121397936	121444378	+	8298	protein_coding	N(alpha)-acetyltransferase 25, NatB auxiliary subunit [Source:MGI Symbol;Acc:MGI:2442563]	-
ENSMUSG00000047881	2303.94	1837.9	1371.56	1477.1	1061.73	1263.8	528.081	514.11	551.716	632.834	512.848	519.633	1552.67	543.204	1.51554	3.63895e-16	7.34806e-15	Rell1	5	63908897	63968897	-	3856	protein_coding	RELT-like 1 [Source:MGI Symbol;Acc:MGI:2140767]	-
ENSMUSG00000105987	2147.17	1955.6	1456.72	1527.9	1590.11	1788.67	917.104	660.876	615.946	481.234	706.29	566.045	1744.36	657.916	1.40722	3.86928e-16	7.80628e-15	AI506816	5	23698296	23712667	-	4479	processed_transcript	expressed sequence AI506816 [Source:MGI Symbol;Acc:MGI:2140929]	-
ENSMUSG00000039531	343.741	413.452	385.791	300.891	369.245	384.832	160.387	178.522	171.279	167.149	211.437	140.146	366.325	171.487	1.09587	3.89456e-16	7.85037e-15	Zup1	10	33919142	33951269	-	9072	protein_coding	zinc finger containing ubiquitin peptidase 1 [Source:MGI Symbol;Acc:MGI:1919830]	-
ENSMUSG00000061079	449.882	388.303	446.434	496.275	427.677	363.199	220.958	157.065	155.633	206.021	221.334	193.839	428.628	192.475	1.15462	3.93972e-16	7.93444e-15	Zfp143	7	110061217	110095394	+	3484	protein_coding	zinc finger protein 143 [Source:MGI Symbol;Acc:MGI:1277969]	zf-C2H2
ENSMUSG00000018398	420.669	343.035	110.963	174.543	152.92	379.139	1368.4	1427.32	1728.44	1638.84	1159.76	1378.71	263.545	1450.24	-2.45799	3.99619e-16	8.04112e-15	2021-09-08	11	53519257	53549565	+	6087	protein_coding	septin 8 [Source:MGI Symbol;Acc:MGI:894310]	-
ENSMUSG00000026020	1983.57	1538.12	1051.57	976.918	1178.6	2322.65	447.888	405.108	394.436	468.795	304.11	269.372	1508.57	381.618	1.983	4.04067e-16	8.12348e-15	Nop58	1	59684971	59719044	+	10758	protein_coding	NOP58 ribonucleoprotein [Source:MGI Symbol;Acc:MGI:1933184]	-
ENSMUSG00000020102	34.082	41.2446	15.4833	11.723	24.865	18.2169	140.765	275.508	125.989	199.802	94.472	153.797	24.2691	165.055	-2.75034	4.13402e-16	8.30389e-15	Slc16a7	10	125219270	125389465	-	11839	protein_coding	solute carrier family 16 (monocarboxylic acid transporters), member 7 [Source:MGI Symbol;Acc:MGI:1330284]	-
ENSMUSG00000022018	5699.49	5798.39	8300.32	11052.2	8577.17	6940.63	3241	2213.5	1672.44	2488.58	1553.84	1803.7	7728.03	2162.18	1.8375	4.2255e-16	8.48021e-15	Rgcc	14	79288756	79301645	-	918	protein_coding	regulator of cell cycle [Source:MGI Symbol;Acc:MGI:1913464]	-
ENSMUSG00000018347	282.394	264.569	300.633	399.885	283.461	326.765	126.262	126.167	125.989	152.378	114.266	157.437	309.618	133.75	1.20888	4.26717e-16	8.55635e-15	Zkscan6	11	65807175	65829239	+	2371	protein_coding	zinc finger with KRAB and SCAN domains 6 [Source:MGI Symbol;Acc:MGI:1289293]	zf-C2H2
ENSMUSG00000044167	2079	2037.08	2073.47	2454.02	2634.44	1441.41	670.552	636.844	760.051	1069.75	587.526	647.949	2119.9	728.779	1.53999	4.29008e-16	8.59477e-15	Foxo1	3	52268336	52353221	+	8665	protein_coding	forkhead box O1 [Source:MGI Symbol;Acc:MGI:1890077]	Fork
ENSMUSG00000047842	0	1.00597	0	0	0	0	44.3622	48.922	46.1136	66.0822	26.0923	33.6715	0.167661	44.2073	-7.22716	4.33594e-16	8.67906e-15	Diras2	13	52504380	52531279	-	4786	protein_coding	DIRAS family, GTP-binding RAS-like 2 [Source:MGI Symbol;Acc:MGI:1915453]	-
ENSMUSG00000040722	131.459	138.823	105.802	109.415	113.136	144.597	234.608	272.933	329.383	303.978	251.026	286.663	123.872	279.765	-1.1714	4.36111e-16	8.72184e-15	Scamp5	9	57441327	57468060	-	3707	protein_coding	secretory carrier membrane protein 5 [Source:MGI Symbol;Acc:MGI:1928948]	-
ENSMUSG00000019124	62.3214	78.4654	25.8054	54.7074	23.6217	92.223	404.379	379.36	694.174	830.304	285.215	253.901	56.1907	474.556	-3.07418	4.65554e-16	9.30255e-15	Scrn1	6	54501173	54566489	-	8613	protein_coding	secernin 1 [Source:MGI Symbol;Acc:MGI:1917188]	-
ENSMUSG00000026773	17453.9	15192.1	11390.5	14871.3	12824.1	9183.59	3746.9	6180.48	3586.16	2553.88	2920.53	3388.99	13485.9	3729.49	1.85443	4.92084e-16	9.82412e-15	Pfkfb3	2	11471433	11554077	-	7561	protein_coding	6-phosphofructo-2-kinase/fructose-2,6-biphosphatase 3 [Source:MGI Symbol;Acc:MGI:2181202]	-
ENSMUSG00000031827	320.371	504.995	251.603	291.773	192.704	359.784	933.313	1211.89	1917.01	1424.27	992.406	1186.69	320.205	1277.6	-1.99505	4.93715e-16	9.84255e-15	Cotl1	8	119809222	119840544	-	1596	protein_coding	coactosin-like 1 (Dictyostelium) [Source:MGI Symbol;Acc:MGI:1919292]	-
ENSMUSG00000041117	66.2165	26.1551	3.87082	31.2614	13.6757	39.8494	268.733	236.885	353.263	387.164	258.223	261.182	30.1715	294.242	-3.2745	4.93865e-16	9.84255e-15	Ccdc8	7	16992708	16997516	+	4809	protein_coding	coiled-coil domain containing 8 [Source:MGI Symbol;Acc:MGI:3612184]	-
ENSMUSG00000031934	481.043	530.144	557.398	423.331	400.326	502.103	220.105	133.033	174.573	196.692	245.627	178.368	482.391	191.4	1.33423	5.01176e-16	9.97957e-15	Panx1	9	15002128	15045478	-	6030	protein_coding	pannexin 1 [Source:MGI Symbol;Acc:MGI:1860055]	-
ENSMUSG00000104654	23.3705	33.1969	55.4817	42.9844	33.5677	50.0964	0.85312	5.14968	3.29383	5.44206	3.59893	6.37028	39.7829	4.11798	3.26694	5.03802e-16	1.00221e-14	Gm43814	9	111052781	111053193	-	413	TEC	predicted gene 43814 [Source:MGI Symbol;Acc:MGI:5663951]	-
ENSMUSG00000054013	10.7115	13.0776	9.0319	16.9333	13.6757	6.83133	154.415	286.666	71.6408	202.911	44.0869	89.1839	11.7102	141.484	-3.59857	5.14294e-16	1.02142e-14	Tmem179	12	112500189	112516747	-	2499	protein_coding	transmembrane protein 179 [Source:MGI Symbol;Acc:MGI:2144891]	-
ENSMUSG00000042265	40.8984	104.621	28.386	37.7742	54.7029	46.6808	0.85312	0	0	0.777438	0	0	52.1771	0.27176	7.42084	5.1624e-16	1.0244e-14	Trem1	17	48232768	48246924	+	2996	protein_coding	triggering receptor expressed on myeloid cells 1 [Source:MGI Symbol;Acc:MGI:1930005]	-
ENSMUSG00000027217	25.3181	26.1551	21.9346	16.9333	4.97299	7.96989	156.974	187.105	86.463	126.722	88.1738	105.565	17.214	125.167	-2.8498	5.21197e-16	1.03334e-14	Tspan18	2	93201760	93334505	-	8175	protein_coding	tetraspanin 18 [Source:MGI Symbol;Acc:MGI:1917186]	-
ENSMUSG00000002257	28.2394	26.1551	38.7082	35.1691	18.6487	19.3554	80.1933	111.576	128.459	129.832	80.0762	111.935	27.7126	107.012	-1.95634	5.3905e-16	1.06689e-14	Def6	17	28207778	28228608	+	2672	protein_coding	differentially expressed in FDCP 6 [Source:MGI Symbol;Acc:MGI:1346328]	-
ENSMUSG00000038216	109.062	163.973	414.177	532.746	501.029	159.398	34.9779	12.0159	14.8222	7.77438	38.6885	30.9414	313.398	23.2034	3.75801	5.41827e-16	1.07146e-14	Pnmt	11	98386450	98388181	+	1154	protein_coding	phenylethanolamine-N-methyltransferase [Source:MGI Symbol;Acc:MGI:97724]	-
ENSMUSG00000038179	334.977	644.825	418.048	89.8765	172.812	448.591	34.1248	50.6385	48.584	37.317	41.3877	47.3221	351.521	43.229	3.02472	5.45557e-16	1.07791e-14	Slamf7	1	171632403	171653035	-	4577	protein_coding	SLAM family member 7 [Source:MGI Symbol;Acc:MGI:1922595]	-
ENSMUSG00000071847	44.7935	114.68	21.9346	15.6307	17.4055	42.1266	545.144	766.444	537.717	712.133	254.624	313.964	42.7618	521.671	-3.60003	5.5844e-16	1.10241e-14	Apcdd1	18	62922327	62953195	+	2799	protein_coding	adenomatosis polyposis coli down-regulated 1 [Source:MGI Symbol;Acc:MGI:3513977]	-
ENSMUSG00000074570	13.6328	3.0179	5.16109	1.30256	11.1892	9.10844	38.3904	52.3551	78.2284	66.8597	62.0816	73.7133	7.23534	61.9381	-3.07589	5.76111e-16	1.13632e-14	Cass4	2	172393794	172433757	+	5340	protein_coding	Cas scaffolding protein family member 4 [Source:MGI Symbol;Acc:MGI:2444482]	-
novel.263	37.9771	16.0955	58.0622	69.0356	53.4597	44.4037	0	0	1.64691	0.777438	0.899733	0.91004	46.5056	0.705687	6.02966	5.83848e-16	1.15059e-14	-	19	36767319	36767991	-	673	-	- && - && -	-
ENSMUSG00000022357	786.807	566.359	721.262	567.915	1196.01	433.79	158.68	148.482	40.3494	120.503	125.963	145.606	712.023	123.264	2.53051	5.88875e-16	1.1595e-14	Klhl38	15	58314573	58324169	-	2212	protein_coding	kelch-like 38 [Source:MGI Symbol;Acc:MGI:3045310]	-
ENSMUSG00000021958	205.466	225.336	194.831	155.004	197.677	252.759	84.4589	60.9379	83.9926	90.9602	75.5776	92.8241	205.179	81.4586	1.33431	6.24166e-16	1.22668e-14	Pinx1	14	63860364	63919859	+	1946	protein_coding	PIN2/TERF1 interacting, telomerase inhibitor 1 [Source:MGI Symbol;Acc:MGI:1919650]	-
ENSMUSG00000097124	5.84263	6.0358	1.29027	7.81535	3.72975	6.83133	45.2154	42.0557	97.9914	33.4298	55.7835	51.8723	5.25752	54.3913	-3.35742	6.24585e-16	1.22668e-14	A530020G20Rik	3	121531619	121536206	+	3773	antisense	RIKEN cDNA A530020G20 gene [Source:MGI Symbol;Acc:MGI:2442825]	-
ENSMUSG00000111377	73.0329	51.3043	119.995	108.112	141.73	72.8675	23.0342	6.00796	8.23457	12.439	17.0949	14.5606	94.5071	13.5619	2.79995	6.24597e-16	1.22668e-14	Gm40634	10	43740114	43743087	-	2001	lincRNA	predicted gene, 40634 [Source:MGI Symbol;Acc:MGI:5623519]	-
ENSMUSG00000038418	1542.45	1181	1156.08	746.366	1031.9	1387.9	428.266	211.995	247.861	134.497	325.703	286.663	1174.28	272.497	2.1082	6.36624e-16	1.24923e-14	Egr1	18	34859823	34864984	+	4484	protein_coding	early growth response 1 [Source:MGI Symbol;Acc:MGI:95295]	zf-C2H2
ENSMUSG00000034685	31.1607	32.1909	19.3541	37.7742	21.1352	6.83133	144.177	178.522	346.675	397.271	125.963	144.696	24.7411	222.884	-3.17002	6.40609e-16	1.25598e-14	Fam171a2	11	102436981	102447682	-	3119	protein_coding	family with sequence similarity 171, member A2 [Source:MGI Symbol;Acc:MGI:2448496]	-
ENSMUSG00000031398	13.6328	24.1432	6.45136	16.9333	9.94599	13.6627	63.984	58.3631	86.463	129.832	78.2768	83.7237	14.1282	83.4404	-2.54733	6.432e-16	1.25998e-14	Plxna3	X	74329066	74344689	+	7880	protein_coding	plexin A3 [Source:MGI Symbol;Acc:MGI:107683]	-
ENSMUSG00000021097	40.8984	63.3759	65.8039	18.2358	50.9732	42.1266	318.214	553.591	374.673	733.901	200.64	166.537	46.9023	391.259	-3.05947	6.4606e-16	1.2645e-14	Clmn	12	104763117	104865076	-	12409	protein_coding	calmin [Source:MGI Symbol;Acc:MGI:2136957]	-
ENSMUSG00000019814	1185.08	1180	1181.89	1195.75	1005.79	1450.52	548.556	452.314	501.485	415.152	665.803	600.627	1199.84	530.656	1.17763	6.7751e-16	1.32493e-14	Ltv1	10	13178140	13193168	-	2317	protein_coding	LTV1 ribosome biogenesis factor [Source:MGI Symbol;Acc:MGI:2447810]	-
ENSMUSG00000033697	50.6361	55.3282	56.772	67.733	57.1894	78.5603	132.234	137.325	170.456	178.811	152.055	151.977	61.0365	153.809	-1.33797	7.00969e-16	1.36964e-14	Arhgap39	15	76723985	76818170	-	7367	protein_coding	Rho GTPase activating protein 39 [Source:MGI Symbol;Acc:MGI:107858]	-
ENSMUSG00000079491	177.226	272.617	295.472	115.928	170.325	379.139	45.2154	56.6465	48.584	55.1981	40.488	57.3325	235.118	50.5774	2.21706	7.02007e-16	1.3705e-14	H2-T10	17	36115876	36121465	-	3419	polymorphic_pseudogene	histocompatibility 2, T region locus 10 [Source:MGI Symbol;Acc:MGI:95942]	-
ENSMUSG00000025597	20.4492	8.04773	7.74163	20.8409	13.6757	5.69278	111.759	58.3631	73.2877	62.195	78.2768	84.6337	12.7413	78.0858	-2.61434	7.21611e-16	1.40757e-14	Klhl4	X	114474333	114560829	+	3584	protein_coding	kelch-like 4 [Source:MGI Symbol;Acc:MGI:2442829]	-
ENSMUSG00000005481	1206.5	967.74	888.997	907.883	992.112	1546.16	453.007	380.218	424.08	338.185	494.853	436.819	1084.9	421.194	1.3657	7.41735e-16	1.4456e-14	Ddx39	8	83715177	83726892	+	5155	protein_coding	DEAD (Asp-Glu-Ala-Asp) box polypeptide 39 [Source:MGI Symbol;Acc:MGI:1915528]	-
ENSMUSG00000034911	115.879	74.4415	59.3525	49.4972	79.5679	43.2651	515.285	353.611	216.569	239.451	530.843	625.198	70.3338	413.493	-2.55128	7.48369e-16	1.45729e-14	Ushbp1	8	71384272	71395802	-	6461	protein_coding	USH1 protein network component harmonin binding protein 1 [Source:MGI Symbol;Acc:MGI:1922920]	-
ENSMUSG00000042190	255.128	243.444	167.735	96.3893	126.811	185.585	729.418	828.24	792.166	1080.64	520.046	588.796	179.182	756.551	-2.07503	7.51988e-16	1.46309e-14	Cmklr1	5	113612354	113650426	-	3408	protein_coding	chemokine-like receptor 1 [Source:MGI Symbol;Acc:MGI:109603]	-
ENSMUSG00000033488	51.6099	60.358	50.3206	42.9844	34.811	46.6808	121.143	151.916	115.284	149.268	116.066	164.717	47.7941	136.399	-1.50548	7.68139e-16	1.49325e-14	Cryzl2	1	157458577	157492638	+	2534	protein_coding	crystallin zeta like 2 [Source:MGI Symbol;Acc:MGI:2448516]	-
ENSMUSG00000039929	521.942	384.279	356.115	376.439	392.867	498.687	181.715	198.263	204.217	216.128	170.05	187.468	421.721	192.973	1.1287	7.94235e-16	1.54267e-14	Urb1	16	90751527	90810413	-	8190	protein_coding	URB1 ribosome biogenesis 1 homolog (S. cerevisiae) [Source:MGI Symbol;Acc:MGI:2146468]	-
ENSMUSG00000024927	2621.39	2864.99	2566.35	1982.49	2155.79	3266.52	1042.51	961.274	1272.24	1273.44	950.118	900.03	2576.26	1066.6	1.27223	8.26964e-16	1.60488e-14	Rela	19	5637483	5648130	+	2716	protein_coding	v-rel reticuloendotheliosis viral oncogene homolog A (avian) [Source:MGI Symbol;Acc:MGI:103290]	RHD
ENSMUSG00000025612	4012.91	3487.69	2278.62	2159.64	2518.82	3318.89	822.408	965.565	923.919	1307.65	666.702	708.011	2962.76	899.043	1.72046	8.28035e-16	1.6056e-14	Bach1	16	87698945	87733346	+	6179	protein_coding	BTB and CNC homology 1, basic leucine zipper transcription factor 1 [Source:MGI Symbol;Acc:MGI:894680]	TF_bZIP
ENSMUSG00000056076	6078.28	5519.74	5084.96	5539.78	5009.05	7786.58	2510.73	2438.37	3022.91	3084.87	2792.77	2536.28	5836.4	2730.99	1.09566	8.29795e-16	1.6063e-14	Eif3b	5	140419328	140443360	+	3346	protein_coding	eukaryotic translation initiation factor 3, subunit B [Source:MGI Symbol;Acc:MGI:106478]	-
novel.480	22.3967	30.179	21.9346	31.2614	26.1082	36.4338	2.55936	0.85828	2.47037	1.55488	2.6992	1.82008	28.0523	1.99369	3.81876	8.40233e-16	1.62441e-14	-	9	23221533	23222771	-	581	-	- && - && -	-
ENSMUSG00000097971	951.375	1000.94	825.774	1168.39	852.868	1000.79	454.713	557.882	428.198	348.292	431.872	381.307	966.69	433.711	1.15652	8.40567e-16	1.62441e-14	Gm26917	17	39843013	39846341	+	3329	lincRNA	predicted gene, 26917 [Source:MGI Symbol;Acc:MGI:5504032]	-
ENSMUSG00000028836	653.401	823.887	770.292	1094.15	1376.28	553.338	320.773	239.46	205.864	181.92	143.957	185.648	878.557	212.937	2.0442	8.83328e-16	1.70561e-14	Slc30a2	4	134343181	134354484	+	3564	protein_coding	solute carrier family 30 (zinc transporter), member 2 [Source:MGI Symbol;Acc:MGI:106637]	-
ENSMUSG00000025213	124.643	160.955	130.317	128.953	92.0004	148.012	322.479	333.013	704.056	440.807	423.774	423.169	130.813	441.216	-1.75272	9.02757e-16	1.7402e-14	Kazald1	19	45075241	45079289	+	1681	protein_coding	Kazal-type serine peptidase inhibitor domain 1 [Source:MGI Symbol;Acc:MGI:2147606]	-
ENSMUSG00000028943	22.3967	43.2566	14.193	16.9333	17.4055	42.1266	187.686	214.57	755.933	912.712	179.047	158.347	26.0519	401.383	-3.94024	9.13525e-16	1.75948e-14	Espn	4	152120331	152152371	-	8272	protein_coding	espin [Source:MGI Symbol;Acc:MGI:1861630]	-
ENSMUSG00000038457	7.79017	17.1014	9.0319	7.81535	0	13.6627	74.2215	45.4889	81.5222	73.8566	62.9813	82.8137	9.23359	70.1474	-2.90247	1.0056e-15	1.93194e-14	Tmem255b	8	13435189	13468473	+	1581	protein_coding	transmembrane protein 255B [Source:MGI Symbol;Acc:MGI:2685533]	-
ENSMUSG00000091694	82.7706	62.3699	85.158	31.2614	36.0542	208.356	3.41248	2.57484	5.7642	8.55182	0.899733	1.82008	84.3283	3.83719	4.43894	1.03883e-15	1.99412e-14	Apol11b	15	77633946	77643286	-	2463	protein_coding	apolipoprotein L 11b [Source:MGI Symbol;Acc:MGI:3036248]	-
ENSMUSG00000018750	445.014	345.047	228.378	285.26	246.163	184.446	1295.89	1321.75	1472.34	2176.05	777.369	916.41	289.051	1326.64	-2.19728	1.05485e-15	2.02318e-14	Zbtb4	11	69765912	69784023	+	8117	protein_coding	zinc finger and BTB domain containing 4 [Source:MGI Symbol;Acc:MGI:1922830]	ZBTB
ENSMUSG00000085511	31.1607	44.2625	9.0319	20.8409	29.838	40.988	0	0	0	0	0	0	29.3537	0	7.55459	1.10057e-15	2.10911e-14	Gm11738	11	118114855	118118279	+	2158	antisense	predicted gene 11738 [Source:MGI Symbol;Acc:MGI:3650365]	-
ENSMUSG00000042807	41.8722	27.1611	25.8054	20.8409	27.3515	12.5241	149.296	171.656	93.0506	177.256	93.5722	104.655	25.9259	131.581	-2.33513	1.14597e-15	2.19428e-14	Hecw2	1	53806876	54195168	-	12947	protein_coding	HECT, C2 and WW domain containing E3 ubiquitin protein ligase 2 [Source:MGI Symbol;Acc:MGI:2685817]	-
ENSMUSG00000021125	67.1902	36.2148	19.3541	26.0512	27.3515	54.6507	0	1.71656	1.64691	0.777438	2.6992	0.91004	38.4687	1.29169	4.9166	1.26415e-15	2.41652e-14	Arg2	12	79130777	79156301	+	1428	protein_coding	arginase type II [Source:MGI Symbol;Acc:MGI:1330806]	-
ENSMUSG00000022075	272.656	263.563	202.573	205.804	241.19	201.524	565.619	537.283	499.015	475.014	421.075	440.459	231.218	489.744	-1.07996	1.30516e-15	2.49078e-14	Rhobtb2	14	69784990	69805636	-	10124	protein_coding	Rho-related BTB domain containing 2 [Source:MGI Symbol;Acc:MGI:2180557]	-
ENSMUSG00000047686	20.4492	7.04177	3.87082	9.1179	12.4325	6.83133	78.4871	60.0796	69.1704	41.9816	68.3797	77.3534	9.95725	65.9086	-2.70094	1.33254e-15	2.5409e-14	Rtl3	X	106837082	106840644	-	2948	protein_coding	retrotransposon Gag like 3 [Source:MGI Symbol;Acc:MGI:2685221]	-
ENSMUSG00000020388	219.099	289.718	207.734	229.25	186.487	259.591	554.528	453.172	929.683	842.743	681.098	664.329	231.98	687.592	-1.56664	1.34183e-15	2.5565e-14	Pdlim4	11	54054928	54069014	-	2560	protein_coding	PDZ and LIM domain 4 [Source:MGI Symbol;Acc:MGI:1353470]	-
ENSMUSG00000057135	77.9017	162.967	132.898	76.8509	64.6489	104.747	5.11872	12.0159	18.1161	9.32925	11.6965	27.3012	103.336	13.9296	2.89718	1.35742e-15	2.58406e-14	Scimp	11	70790932	70812586	-	1080	protein_coding	SLP adaptor and CSK interacting membrane protein [Source:MGI Symbol;Acc:MGI:3610314]	-
ENSMUSG00000026566	84.7181	71.4236	86.4482	91.179	36.0542	100.193	240.58	229.161	262.683	219.237	241.128	224.78	78.336	236.262	-1.59185	1.35977e-15	2.58639e-14	Mpzl1	1	165592240	165634538	-	3550	protein_coding	myelin protein zero-like 1 [Source:MGI Symbol;Acc:MGI:1915731]	-
ENSMUSG00000035456	6.8164	11.0656	7.74163	6.51279	2.4865	0	52.8935	51.4968	52.7012	34.9847	40.488	51.8723	5.77049	47.4061	-3.01604	1.37994e-15	2.62155e-14	Prdm8	5	98167198	98188991	+	4855	protein_coding	PR domain containing 8 [Source:MGI Symbol;Acc:MGI:1924880]	zf-C2H2
ENSMUSG00000070802	0	7.04177	5.16109	13.0256	3.72975	2.27711	46.9216	49.7803	82.3457	41.2042	89.9733	70.0731	5.20588	63.383	-3.64427	1.38055e-15	2.62155e-14	Pnmal2	7	16944682	16948828	+	4147	protein_coding	PNMA-like 2 [Source:MGI Symbol;Acc:MGI:3645856]	-
ENSMUSG00000038342	4242.72	3801.55	2553.45	3046.68	3028.55	2377.3	1459.69	1318.32	950.269	1269.56	1169.65	1213.99	3175.04	1230.25	1.36806	1.42083e-15	2.69582e-14	Mlxip	5	123394798	123457932	+	8326	protein_coding	MLX interacting protein [Source:MGI Symbol;Acc:MGI:2141183]	bHLH
ENSMUSG00000053414	9.73772	11.0656	10.3222	0	4.97299	3.41567	53.7466	54.9299	70.8173	51.3109	45.8864	39.1317	6.5857	52.6371	-2.96373	1.46016e-15	2.76816e-14	Hunk	16	90386013	90499553	+	8402	protein_coding	hormonally upregulated Neu-associated kinase [Source:MGI Symbol;Acc:MGI:1347352]	-
ENSMUSG00000031434	107.115	81.4833	78.7066	112.02	92.0004	67.1748	222.664	214.57	246.214	287.652	195.242	211.129	89.75	229.579	-1.35613	1.46696e-15	2.77874e-14	Morc4	X	139821632	139871677	-	6051	protein_coding	microrchidia 4 [Source:MGI Symbol;Acc:MGI:1922996]	-
ENSMUSG00000087651	205.466	267.587	180.638	152.399	147.947	203.801	63.984	66.0876	46.1136	43.5365	66.5803	78.2635	192.973	60.7609	1.67287	1.52183e-15	2.8803e-14	1500009L16Rik	10	83722865	83762762	+	3465	protein_coding	RIKEN cDNA 1500009L16 gene [Source:MGI Symbol;Acc:MGI:1917034]	-
novel.428	24.3443	40.2387	25.8054	33.8665	23.6217	38.7109	4.2656	0	3.29383	1.55488	0.899733	3.64016	31.0979	2.2757	3.77701	1.67007e-15	3.15306e-14	-	7	28256275	28261765	+	2432	-	- && P21416.3 RecName: Full=Gag polyprotein; AltName: Full=Core polyprotein; Contains: RecName: Full=Matrix protein p15; Short=MA; Contains: RecName: Full=RNA-binding phosphoprotein p12; AltName: Full=pp12; Contains: RecName: Full=Capsid protein p30; Shor	-
ENSMUSG00000031214	115.879	92.5489	138.059	83.3637	110.649	94.5001	277.264	319.28	283.269	377.057	208.738	273.012	105.833	289.77	-1.45457	1.70257e-15	3.21179e-14	Ophn1	X	98554277	98891025	-	13100	protein_coding	oligophrenin 1 [Source:MGI Symbol;Acc:MGI:2151070]	-
ENSMUSG00000038776	383.666	433.572	301.924	263.117	304.596	597.742	1196.93	1578.38	2444.84	2875.74	1179.55	1362.33	380.769	1772.96	-2.2186	1.70399e-15	3.21182e-14	Ephx1	1	180976210	181020904	-	1950	protein_coding	epoxide hydrolase 1, microsomal [Source:MGI Symbol;Acc:MGI:95405]	-
ENSMUSG00000018841	88.6132	98.5847	65.8039	76.8509	57.1894	66.0362	242.286	250.618	278.328	342.85	195.242	169.267	75.5131	246.432	-1.70241	1.70896e-15	3.21854e-14	Rad51d	11	82876434	82890614	-	3714	protein_coding	RAD51 paralog D [Source:MGI Symbol;Acc:MGI:1261809]	-
ENSMUSG00000027722	394.377	379.249	396.114	291.773	331.947	466.808	192.805	124.451	134.223	140.716	153.854	177.458	376.711	153.918	1.29288	1.71093e-15	3.21962e-14	Spata5	3	37419896	37579096	+	3887	protein_coding	spermatogenesis associated 5 [Source:MGI Symbol;Acc:MGI:1927170]	-
ENSMUSG00000069873	17.5279	31.185	19.3541	16.9333	22.3785	40.988	0	0	0	0	0	0	24.7278	0	7.30422	1.74298e-15	3.27722e-14	4930438A08Rik	11	58274799	58294289	+	2093	protein_coding	RIKEN cDNA 4930438A08 gene [Source:MGI Symbol;Acc:MGI:1921238]	-
ENSMUSG00000038351	90.5608	94.5609	51.6109	49.4972	47.2434	81.976	274.705	297.823	443.843	537.21	226.733	223.87	69.2415	334.031	-2.26477	1.79363e-15	3.36695e-14	Sgsm2	11	74849261	74897060	-	6884	protein_coding	small G protein signaling modulator 2 [Source:MGI Symbol;Acc:MGI:2144695]	-
novel.12	8.76394	6.0358	3.87082	5.21023	0	14.8012	55.4528	48.0637	191.042	281.432	96.2714	120.125	6.447	132.065	-4.33965	1.81516e-15	3.40458e-14	-	1	162873203	162874041	+	524	-	- && - && -	-
ENSMUSG00000021134	5454.09	5948.28	6955.86	8180.06	8138.3	7567.98	2584.1	2480.43	2057.82	2005.01	3370.4	3344.4	7040.76	2640.36	1.41503	1.88205e-15	3.52715e-14	Srsf5	12	80945504	80950507	+	3988	protein_coding	serine/arginine-rich splicing factor 5 [Source:MGI Symbol;Acc:MGI:98287]	-
ENSMUSG00000000489	159.699	142.847	126.447	109.415	88.2706	53.5121	954.641	690.916	317.854	406.6	642.409	550.574	113.365	593.833	-2.38716	1.95908e-15	3.66851e-14	Pdgfb	15	79995874	80014977	-	4161	protein_coding	platelet derived growth factor, B polypeptide [Source:MGI Symbol;Acc:MGI:97528]	-
ENSMUSG00000040152	8376.38	9960.07	4887.55	3684.94	4532.88	9725.54	1064.69	1712.27	1748.2	1434.37	1967.72	1194.88	6861.23	1520.36	2.17414	2.03069e-15	3.79798e-14	Thbs1	2	118111876	118127133	+	6073	protein_coding	thrombospondin 1 [Source:MGI Symbol;Acc:MGI:98737]	-
ENSMUSG00000037166	11.6853	11.0656	5.16109	36.4716	11.1892	5.69278	121.143	116.726	130.93	69.192	105.269	185.648	13.5443	121.485	-3.17834	2.03153e-15	3.79798e-14	Ppp1r14a	7	29289308	29293801	+	1367	protein_coding	protein phosphatase 1, regulatory inhibitor subunit 14A [Source:MGI Symbol;Acc:MGI:1931139]	-
ENSMUSG00000110206	22.3967	35.2088	32.2568	22.1435	28.5947	25.0482	88.7245	92.6943	102.109	86.2956	131.361	179.278	27.6081	113.41	-2.0361	2.05533e-15	3.83936e-14	Flt3l	7	45129788	45136432	-	3878	protein_coding	FMS-like tyrosine kinase 3 ligand [Source:MGI Symbol;Acc:MGI:95560]	-
ENSMUSG00000023961	4631.26	4258.26	3225.68	2177.88	3013.63	4599.76	1432.39	1180.14	1189.9	1330.2	1369.39	1042.91	3651.08	1257.49	1.53796	2.07411e-15	3.87128e-14	Enpp4	17	44096308	44105809	-	4560	protein_coding	ectonucleotide pyrophosphatase/phosphodiesterase 4 [Source:MGI Symbol;Acc:MGI:2682634]	-
ENSMUSG00000050558	75.9542	35.2088	21.9346	14.3281	49.7299	201.524	0.85312	0	0	0	0	0	66.4467	0.142187	8.24755	2.14788e-15	4.00246e-14	Prokr2	2	132337733	132385447	-	7919	protein_coding	prokineticin receptor 2 [Source:MGI Symbol;Acc:MGI:2181363]	-
ENSMUSG00000044103	58.4263	83.4952	33.5471	36.4716	21.1352	48.9579	0	0	0	0.777438	0.899733	0	47.0056	0.279528	7.2723	2.16742e-15	4.03559e-14	Il1f9	2	24186476	24193568	+	1648	protein_coding	interleukin 1 family, member 9 [Source:MGI Symbol;Acc:MGI:2449929]	-
ENSMUSG00000024975	389.509	328.951	267.086	259.209	263.569	302.856	598.037	668.6	722.172	814.755	630.713	593.346	301.863	671.271	-1.15047	2.1979e-15	4.08902e-14	Pdcd4	19	53892231	53929861	+	2556	protein_coding	programmed cell death 4 [Source:MGI Symbol;Acc:MGI:107490]	-
ENSMUSG00000045795	716.696	935.549	745.777	604.387	686.273	882.38	308.829	363.053	347.499	394.161	257.324	303.043	761.844	328.985	1.21146	2.24511e-15	4.17347e-14	Whamm	7	81571266	81596836	+	3176	protein_coding	WAS protein homolog associated with actin, golgi membranes and microtubules [Source:MGI Symbol;Acc:MGI:2142282]	-
ENSMUSG00000029919	10.7115	54.3222	23.2249	19.5384	12.4325	25.0482	130.527	162.215	159.751	167.927	108.868	158.347	24.2129	147.939	-2.60236	2.28573e-15	4.24307e-14	Hpgds	6	65117293	65144908	-	6425	protein_coding	hematopoietic prostaglandin D synthase [Source:MGI Symbol;Acc:MGI:1859384]	-
ENSMUSG00000043439	360.295	429.548	317.407	259.209	272.271	499.826	20.4749	60.0796	62.5827	108.841	76.4773	67.343	356.426	65.9665	2.43336	2.28625e-15	4.24307e-14	Epop	11	97627389	97629702	-	2314	protein_coding	elongin BC and polycomb repressive complex 2 associated protein [Source:MGI Symbol;Acc:MGI:2143991]	-
ENSMUSG00000029174	1615.49	1486.82	1219.31	1035.53	1128.87	1551.85	548.556	461.755	426.551	426.036	552.436	696.181	1339.64	518.586	1.37012	2.34932e-15	4.35658e-14	Tbc1d1	5	64156305	64351486	+	7405	protein_coding	TBC1 domain family, member 1 [Source:MGI Symbol;Acc:MGI:1889508]	-
ENSMUSG00000048807	1913.46	2445.5	2954.72	3089.67	3297.1	1871.79	1175.6	950.116	844.867	688.81	987.907	778.084	2595.37	904.231	1.52103	2.36031e-15	4.37343e-14	Slc35e4	11	3907021	3914664	-	3063	protein_coding	solute carrier family 35, member E4 [Source:MGI Symbol;Acc:MGI:2144150]	-
ENSMUSG00000051379	7.79017	21.1253	11.6124	5.21023	8.70274	13.6627	51.1872	78.1035	69.1704	76.1889	44.9867	80.0835	11.3506	66.62	-2.53523	2.42395e-15	4.48773e-14	Flrt3	2	140650914	140671469	-	4865	protein_coding	fibronectin leucine rich transmembrane protein 3 [Source:MGI Symbol;Acc:MGI:1918686]	-
ENSMUSG00000046856	8.76394	5.02983	7.74163	5.21023	2.4865	9.10844	51.1872	77.2452	66.7	135.274	32.3904	49.1422	6.3901	68.6565	-3.41741	2.42594e-15	4.4878e-14	Gpr1	1	63182691	63214543	-	2496	protein_coding	G protein-coupled receptor 1 [Source:MGI Symbol;Acc:MGI:2385324]	-
ENSMUSG00000021508	9439.74	8518.52	8692.56	9110.09	9298.26	10027.3	4428.55	3579.03	2957.86	2742.8	2928.63	5117.16	9181.07	3625.67	1.34048	2.44042e-15	4.51094e-14	Cxcl14	13	56288643	56296551	-	1827	protein_coding	chemokine (C-X-C motif) ligand 14 [Source:MGI Symbol;Acc:MGI:1888514]	-
ENSMUSG00000037921	1029.28	1414.39	744.487	375.137	632.813	1110.09	159.533	202.554	203.394	204.466	91.7728	119.215	884.366	163.489	2.43531	2.47296e-15	4.56742e-14	Ddx60	8	61928087	62038244	+	8684	protein_coding	DEAD (Asp-Glu-Ala-Asp) box polypeptide 60 [Source:MGI Symbol;Acc:MGI:2384570]	-
ENSMUSG00000046207	292.131	353.094	304.504	212.317	315.785	332.458	123.702	104.71	141.635	109.619	115.166	151.977	301.715	124.468	1.27937	2.66411e-15	4.9165e-14	Pik3r6	11	68503019	68552698	+	3622	protein_coding	phosphoinositide-3-kinase regulatory subunit 5 [Source:MGI Symbol;Acc:MGI:2144613]	-
ENSMUSG00000004360	138.276	132.788	149.672	272.235	182.758	135.488	747.333	751.854	417.493	442.362	735.982	565.135	168.536	610.026	-1.85823	2.97205e-15	5.48038e-14	9330159F19Rik	10	29211606	29230779	+	5767	protein_coding	RIKEN cDNA 9330159F19 gene [Source:MGI Symbol;Acc:MGI:3036239]	-
ENSMUSG00000088246	57.4525	25.1492	159.994	97.6918	60.9192	44.4037	3.41248	5.14968	7.41111	3.10975	0.899733	8.19036	74.2683	4.69552	3.98117	3.10064e-15	5.71289e-14	Gm25911	1	167340369	167340424	-	56	miRNA	predicted gene, 25911 [Source:MGI Symbol;Acc:MGI:5455688]	-
ENSMUSG00000026925	93.4821	116.692	110.963	66.4304	101.946	72.8675	255.083	255.768	223.98	298.536	200.64	238.431	93.7303	245.406	-1.38689	3.17867e-15	5.85196e-14	Inpp5e	2	26396249	26409203	-	4301	protein_coding	inositol polyphosphate-5-phosphatase E [Source:MGI Symbol;Acc:MGI:1927753]	-
ENSMUSG00000025577	10.7115	6.0358	2.58054	10.4205	1.24325	10.247	34.1248	63.5127	57.642	94.07	61.1819	52.7823	6.87309	60.5523	-3.12037	3.21006e-15	5.90502e-14	Cbx2	11	119022962	119031270	+	4257	protein_coding	chromobox 2 [Source:MGI Symbol;Acc:MGI:88289]	-
ENSMUSG00000034161	86.6657	103.615	158.703	117.23	151.676	117.271	292.62	352.753	486.663	408.155	423.774	271.192	122.527	372.526	-1.60863	3.29015e-15	6.0475e-14	Scx	15	76457452	76459458	+	2007	protein_coding	scleraxis [Source:MGI Symbol;Acc:MGI:102934]	bHLH
ENSMUSG00000017412	13.6328	12.0716	10.3222	13.0256	9.94599	12.5241	47.7747	67.8041	43.6432	60.6401	54.8837	41.8618	11.9204	52.768	-2.14043	3.39258e-15	6.23078e-14	Cacnb4	2	52428320	52676831	-	8963	protein_coding	calcium channel, voltage-dependent, beta 4 subunit [Source:MGI Symbol;Acc:MGI:103301]	-
ENSMUSG00000022586	24.3443	26.1551	32.2568	41.6819	27.3515	36.4338	4.2656	2.57484	1.64691	3.88719	6.29813	3.64016	31.3706	3.71881	3.0785	3.51136e-15	6.44376e-14	Ly6i	15	74979534	74983430	-	1156	protein_coding	lymphocyte antigen 6 complex, locus I [Source:MGI Symbol;Acc:MGI:1888480]	-
ENSMUSG00000027284	104.194	117.698	112.254	118.533	118.109	113.856	204.749	227.444	212.452	224.68	282.516	249.351	114.107	233.532	-1.03369	3.51817e-15	6.45111e-14	Cdan1	2	120716154	120850128	-	11421	protein_coding	congenital dyserythropoietic anemia, type I (human) [Source:MGI Symbol;Acc:MGI:1916218]	-
ENSMUSG00000089812	4.86886	6.0358	3.87082	5.21023	3.72975	5.69278	31.5654	29.1815	43.6432	32.6524	47.6859	36.4016	4.90137	36.855	-2.89719	3.57376e-15	6.5478e-14	Gm15867	1	192854923	192856246	+	388	antisense	predicted gene 15867 [Source:MGI Symbol;Acc:MGI:3801862]	-
ENSMUSG00000021253	490.781	475.822	381.921	435.054	440.11	321.073	1117.59	1147.52	1935.12	1994.91	1038.29	1031.08	424.127	1377.42	-1.69918	3.66239e-15	6.70483e-14	Tgfb3	12	86056745	86079041	-	3383	protein_coding	transforming growth factor, beta 3 [Source:MGI Symbol;Acc:MGI:98727]	-
ENSMUSG00000048442	6.8164	8.04773	1.29027	14.3281	8.70274	4.55422	58.8653	38.6226	58.4654	35.7621	67.48	69.1631	7.28992	54.7264	-2.91235	3.67198e-15	6.71703e-14	Smim5	11	115899966	115906269	+	1649	protein_coding	small integral membrane protein 5 [Source:MGI Symbol;Acc:MGI:1913778]	-
ENSMUSG00000039285	3415.02	3991.68	2860.53	1906.94	2426.82	3877.92	1161.1	1142.37	1156.13	1133.5	1184.95	1166.67	3079.82	1157.45	1.41216	3.76119e-15	6.87474e-14	Azi2	9	118040499	118069794	+	6439	protein_coding	5-azacytidine induced gene 2 [Source:MGI Symbol;Acc:MGI:1351332]	-
novel.244	16411	13162.1	6811.35	5232.37	5144.56	10047.8	1567.18	2631.49	1110.02	1739.13	864.644	1223.09	9468.18	1522.59	2.63658	3.77596e-15	6.89624e-14	-	19	4060261	4066422	+	6162	-	- && P21414.1 RecName: Full=Pol polyprotein; Contains: RecName: Full=Protease; Contains: RecName: Full=Reverse transcriptase/ribonuclease H; Short=RT; Contains: RecName: Full=Integrase; Short=IN && -	-
ENSMUSG00000067931	305.764	270.605	294.182	242.276	264.812	355.229	138.205	151.057	131.753	148.491	111.567	136.506	288.811	136.263	1.08394	3.88839e-15	7.09592e-14	Zfp948	17	21567008	21588699	+	2652	protein_coding	zinc finger protein 948 [Source:MGI Symbol;Acc:MGI:3040683]	zf-C2H2
ENSMUSG00000063838	86.6657	95.5668	61.9331	61.2202	41.0272	94.5001	188.54	220.578	303.856	303.978	233.031	242.071	73.4855	248.675	-1.75216	3.89818e-15	7.10814e-14	Cdc42ep5	7	4151260	4164860	-	1288	protein_coding	CDC42 effector protein (Rho GTPase binding) 5 [Source:MGI Symbol;Acc:MGI:1929745]	-
ENSMUSG00000036473	124.643	92.5489	69.6747	75.5484	98.2166	76.2832	298.592	279.799	274.211	333.521	196.142	209.309	89.4858	265.262	-1.5633	3.95416e-15	7.20449e-14	Tbc1d24	17	24175431	24209387	-	13362	protein_coding	TBC1 domain family, member 24 [Source:MGI Symbol;Acc:MGI:2443456]	-
ENSMUSG00000022537	16.5541	17.1014	10.3222	20.8409	7.45949	3.41567	85.312	102.135	53.5247	62.195	108.868	130.136	12.6156	90.3618	-2.83332	4.03192e-15	7.33451e-14	Tmem44	16	30511855	30550842	-	8893	protein_coding	transmembrane protein 44 [Source:MGI Symbol;Acc:MGI:1924489]	-
ENSMUSG00000082676	33.1082	37.2208	59.3525	45.5895	48.4867	95.6387	2.55936	6.00796	3.29383	11.6616	4.49867	6.37028	53.2327	5.73194	3.20306	4.55156e-15	8.26669e-14	Gm11843	4	12131551	12131975	-	425	processed_pseudogene	predicted gene 11843 [Source:MGI Symbol;Acc:MGI:3651166]	-
ENSMUSG00000027656	60.3738	77.4594	27.0957	37.7742	31.0812	150.289	326.745	521.834	871.217	838.855	417.476	412.248	64.0123	564.729	-3.13776	4.64243e-15	8.42505e-14	Wisp2	2	163820861	163833146	+	1924	protein_coding	WNT1 inducible signaling pathway protein 2 [Source:MGI Symbol;Acc:MGI:1328326]	-
ENSMUSG00000022756	11.6853	14.0835	9.0319	16.9333	9.94599	11.3856	52.0403	60.9379	142.458	229.344	98.0709	69.1631	12.1776	108.669	-3.15835	4.67614e-15	8.47953e-14	Slc7a4	16	17572018	17583214	-	4153	protein_coding	solute carrier family 7 (cationic amino acid transporter, y+ system), member 4 [Source:MGI Symbol;Acc:MGI:2146512]	-
ENSMUSG00000022671	1047.78	965.728	1936.7	2154.43	1680.87	791.296	400.966	398.242	381.261	347.515	372.49	396.778	1429.47	382.875	1.90011	4.68807e-15	8.49444e-14	Mzt2	16	15848441	15863369	-	1309	protein_coding	mitotic spindle organizing protein 2 [Source:MGI Symbol;Acc:MGI:1922845]	-
ENSMUSG00000034110	31.1607	46.2745	29.6763	19.5384	19.892	44.4037	128.821	110.718	139.988	142.271	93.5722	103.745	31.8242	119.852	-1.90146	4.72706e-15	8.55834e-14	Kctd7	5	130144861	130155806	+	4368	protein_coding	potassium channel tetramerisation domain containing 7 [Source:MGI Symbol;Acc:MGI:2442265]	-
ENSMUSG00000067825	87.6394	57.3401	76.1261	49.4972	85.7841	83.1145	176.596	193.113	233.038	261.219	167.35	212.949	73.2502	207.378	-1.50033	4.93649e-15	8.93046e-14	Pex26	6	121183667	121198837	+	5667	protein_coding	peroxisomal biogenesis factor 26 [Source:MGI Symbol;Acc:MGI:1921293]	-
ENSMUSG00000049928	114.905	151.901	36.1276	19.5384	50.9732	110.44	0	2.57484	2.47037	4.66463	7.19786	4.5502	80.6475	3.57632	4.5038	4.99844e-15	9.03541e-14	Glp2r	11	67661502	67771153	-	5815	protein_coding	glucagon-like peptide 2 receptor [Source:MGI Symbol;Acc:MGI:2136733]	-
ENSMUSG00000037221	111.01	111.662	150.962	194.081	141.73	109.301	353.192	301.256	452.901	364.618	318.506	374.937	136.458	360.902	-1.40847	5.08871e-15	9.19134e-14	Mospd3	5	137596645	137601058	-	1839	protein_coding	motile sperm domain containing 3 [Source:MGI Symbol;Acc:MGI:1916179]	-
ENSMUSG00000029438	132.433	144.859	149.672	115.928	156.649	107.024	331.011	345.887	261.036	253.445	290.614	330.345	134.427	302.056	-1.16762	5.14552e-15	9.28663e-14	Bcl7a	5	123343834	123374992	+	9490	protein_coding	B cell CLL/lymphoma 7A [Source:MGI Symbol;Acc:MGI:1924295]	-
ENSMUSG00000030717	3833.74	4897.04	4309.51	2834.37	2864.44	5849.9	1007.53	1119.2	1500.34	1320.09	1445.87	1615.32	4098.17	1334.73	1.61856	5.18589e-15	9.35214e-14	Nupr1	7	126623249	126630861	-	2514	protein_coding	nuclear protein transcription regulator 1 [Source:MGI Symbol;Acc:MGI:1891834]	-
ENSMUSG00000052560	1127.63	1193.08	771.583	686.448	800.652	1319.59	232.049	219.72	300.562	395.716	155.654	171.998	983.162	245.95	1.99857	5.19402e-15	9.35944e-14	Cpne8	15	90487482	90679432	-	4164	protein_coding	copine VIII [Source:MGI Symbol;Acc:MGI:1914121]	-
ENSMUSG00000038227	37.9771	36.2148	29.6763	48.1946	46.0002	70.5904	122.849	119.301	209.982	186.585	228.532	227.51	44.7756	182.46	-2.0274	5.33839e-15	9.61204e-14	Hoxa9	6	52223100	52231089	-	5580	protein_coding	homeobox A9 [Source:MGI Symbol;Acc:MGI:96180]	Homeobox
ENSMUSG00000022902	56.4788	17.1014	24.5152	16.9333	21.1352	162.813	0	0	0	0	0	0	49.8295	0	8.31322	5.3824e-15	9.68368e-14	Stfa2	16	36403992	36408457	-	471	protein_coding	stefin A2 [Source:MGI Symbol;Acc:MGI:106197]	-
ENSMUSG00000035004	917.293	994.901	508.367	475.434	430.164	975.742	116.024	174.231	224.804	182.698	98.0709	140.146	716.983	155.996	2.2005	5.39355e-15	9.69614e-14	Igsf6	7	121064067	121074572	-	2175	protein_coding	immunoglobulin superfamily, member 6 [Source:MGI Symbol;Acc:MGI:1891393]	-
ENSMUSG00000036667	232.731	182.08	121.286	156.307	142.974	196.97	545.144	484.928	600.3	772.773	435.471	395.867	172.058	539.081	-1.64503	5.52017e-15	9.90823e-14	Tcaf1	6	42668002	42710088	-	9638	protein_coding	TRPM8 channel-associated factor 1 [Source:MGI Symbol;Acc:MGI:1914665]	-
ENSMUSG00000020140	1.94754	5.02983	11.6124	15.6307	7.45949	13.6627	39.2435	88.4029	101.285	125.945	80.0762	60.0627	9.22378	82.5026	-3.1917	5.78193e-15	1.03699e-13	Lgr5	10	115450311	115587780	-	10264	protein_coding	leucine rich repeat containing G protein coupled receptor 5 [Source:MGI Symbol;Acc:MGI:1341817]	-
ENSMUSG00000001739	208.387	138.823	23.2249	71.6407	59.6759	137.765	802.786	735.546	3421.46	3898.85	984.308	839.967	106.586	1780.49	-4.05987	5.88251e-15	1.05421e-13	Cldn15	5	136966616	136975858	+	2124	protein_coding	claudin 15 [Source:MGI Symbol;Acc:MGI:1913103]	-
ENSMUSG00000028088	119.774	141.841	116.124	130.256	114.379	69.4519	332.717	508.102	388.672	447.027	295.112	260.271	115.304	371.984	-1.68973	5.97464e-15	1.06989e-13	Fmo5	3	97628804	97655282	+	5675	protein_coding	flavin containing monooxygenase 5 [Source:MGI Symbol;Acc:MGI:1310004]	-
ENSMUSG00000030760	743.961	933.537	584.493	595.269	593.03	1213.7	200.483	216.287	265.977	314.862	195.242	225.69	777.332	236.423	1.71712	5.9935e-15	1.07243e-13	Acer3	7	98206389	98321208	-	15324	protein_coding	alkaline ceramidase 3 [Source:MGI Symbol;Acc:MGI:1913440]	-
ENSMUSG00000001768	4354.71	5915.08	3537.93	3206.9	2793.58	4107.91	1034.83	1141.51	1470.69	1694.81	864.644	959.182	3986.02	1194.28	1.73876	6.10011e-15	1.09065e-13	Rin2	2	145675215	145887616	+	11271	protein_coding	Ras and Rab interactor 2 [Source:MGI Symbol;Acc:MGI:1921280]	-
ENSMUSG00000079560	19.4754	17.1014	21.9346	23.446	14.919	7.96989	72.5152	58.3631	63.4062	76.1889	68.3797	104.655	17.4744	73.9179	-2.08586	6.2466e-15	1.11597e-13	Hoxa3	6	52169062	52213336	-	6014	protein_coding	homeobox A3 [Source:MGI Symbol;Acc:MGI:96175]	Homeobox
ENSMUSG00000029050	958.191	699.147	456.756	401.188	464.975	630.76	2472.34	2406.62	3678.38	4625.75	1726.59	1916.54	601.836	2804.37	-2.21951	6.44742e-15	1.15095e-13	Ski	4	155154075	155222592	-	5562	protein_coding	ski sarcoma viral oncogene homolog (avian) [Source:MGI Symbol;Acc:MGI:98310]	-
ENSMUSG00000015340	2883.34	3260.34	1827.03	1190.54	1417.3	2815.65	408.645	596.505	643.12	676.371	448.067	501.432	2232.36	545.69	2.03254	6.54728e-15	1.16767e-13	Cybb	X	9435252	9487771	-	5808	protein_coding	cytochrome b-245, beta polypeptide [Source:MGI Symbol;Acc:MGI:88574]	-
ENSMUSG00000110697	38.9509	43.2566	73.5455	62.5228	52.2164	60.3434	5.11872	15.449	13.1753	6.2195	12.5963	10.0104	55.1393	10.4282	2.40126	6.55125e-15	1.16767e-13	Gm31718	8	126812640	126908215	-	1827	lincRNA	predicted gene, 31718 [Source:MGI Symbol;Acc:MGI:5590877]	-
ENSMUSG00000001227	728.381	574.407	411.597	513.208	416.488	429.235	213.28	183.672	118.578	148.491	119.665	197.479	512.219	163.527	1.64857	6.64804e-15	1.184e-13	Sema6b	17	56123085	56140343	-	3968	protein_coding	sema domain, transmembrane domain (TM), and cytoplasmic domain, (semaphorin) 6B [Source:MGI Symbol;Acc:MGI:1202889]	-
ENSMUSG00000001542	1356.46	1326.87	1599.94	2246.91	1465.79	1173.85	716.621	645.427	539.364	570.639	648.708	600.627	1528.3	620.231	1.3007	6.65643e-15	1.18458e-13	Ell2	13	75706757	75772364	+	9828	protein_coding	elongation factor RNA polymerase II 2 [Source:MGI Symbol;Acc:MGI:2183438]	-
ENSMUSG00000052921	109.062	96.5728	61.9331	56.01	59.6759	44.4037	429.973	372.494	179.514	223.125	413.877	385.857	71.2763	334.14	-2.22294	6.66976e-15	1.18603e-13	Arhgef15	11	68943155	68957480	-	6483	protein_coding	Rho guanine nucleotide exchange factor (GEF) 15 [Source:MGI Symbol;Acc:MGI:3045246]	-
ENSMUSG00000020015	594.974	585.473	474.82	729.432	657.678	428.097	293.473	243.752	237.156	216.128	263.622	244.801	578.412	249.822	1.21127	6.85265e-15	1.21761e-13	Cdk17	10	93160875	93267071	+	6102	protein_coding	cyclin-dependent kinase 17 [Source:MGI Symbol;Acc:MGI:97517]	-
ENSMUSG00000073555	2309.79	1427.47	935.447	234.46	512.218	1382.21	57.1591	149.341	107.873	119.725	27.8917	48.2321	1133.6	85.037	3.73618	7.19013e-15	1.27658e-13	Gm4951	18	60212080	60247820	+	2645	protein_coding	predicted gene 4951 [Source:MGI Symbol;Acc:MGI:3644953]	-
ENSMUSG00000006014	3674.04	5229.01	1939.28	2434.48	1806.44	4523.48	647.518	683.191	653.825	735.456	251.026	332.165	3267.79	550.53	2.56932	7.28529e-15	1.29248e-13	Prg4	1	150449412	150466165	-	4280	protein_coding	proteoglycan 4 (megakaryocyte stimulating factor, articular superficial zone protein) [Source:MGI Symbol;Acc:MGI:1891344]	-
ENSMUSG00000030681	4172.61	4370.92	2851.5	2605.12	2609.58	4759.16	879.567	958.699	1427.05	1421.93	820.557	899.12	3561.48	1067.82	1.73779	7.71391e-15	1.36746e-13	Mvp	7	126986860	127014621	-	7627	protein_coding	major vault protein [Source:MGI Symbol;Acc:MGI:1925638]	-
ENSMUSG00000041235	1260.06	1335.92	859.321	1027.72	844.166	603.434	339.542	309.839	149.046	317.195	230.332	281.202	988.437	271.193	1.86615	7.79777e-15	1.38126e-13	Chd7	4	8690406	8867659	+	13786	protein_coding	chromodomain helicase DNA binding protein 7 [Source:MGI Symbol;Acc:MGI:2444748]	-
ENSMUSG00000008855	894.896	762.523	837.387	685.145	796.922	697.934	1888.81	1746.6	1981.24	2280.23	1372.99	1393.27	779.135	1777.19	-1.1896	8.14527e-15	1.4417e-13	Hdac5	11	102194432	102230166	-	8780	protein_coding	histone deacetylase 5 [Source:MGI Symbol;Acc:MGI:1333784]	-
ENSMUSG00000058392	476.174	446.649	371.598	337.362	379.191	607.989	126.262	146.766	188.572	171.814	152.955	199.299	436.494	164.278	1.41092	8.37743e-15	1.48165e-13	Rrp1b	17	32036100	32062865	+	7702	protein_coding	ribosomal RNA processing 1 homolog B (S. cerevisiae) [Source:MGI Symbol;Acc:MGI:1919712]	-
ENSMUSG00000047592	9.73772	28.1671	5.16109	10.4205	6.21624	14.8012	58.8653	86.6863	139.988	100.289	79.1765	80.9936	12.4173	90.9998	-2.84997	8.39367e-15	1.48338e-13	Nxpe5	5	138225898	138253363	+	4473	protein_coding	neurexophilin and PC-esterase domain family, member 5 [Source:MGI Symbol;Acc:MGI:3584036]	-
ENSMUSG00000052534	342.768	480.852	327.729	237.066	324.488	327.904	985.354	1050.54	1517.63	1798.21	878.14	848.157	340.134	1179.67	-1.79337	8.92217e-15	1.57556e-13	Pbx1	1	168119364	168432270	-	13844	protein_coding	pre B cell leukemia homeobox 1 [Source:MGI Symbol;Acc:MGI:97495]	Homeobox
ENSMUSG00000022044	27.2656	26.1551	15.4833	18.2358	6.21624	10.247	138.205	94.4108	116.107	125.945	56.6832	93.7341	17.2672	104.181	-2.57601	9.15861e-15	1.61607e-13	Stmn4	14	66344296	66361680	+	1916	protein_coding	stathmin-like 4 [Source:MGI Symbol;Acc:MGI:1931224]	-
ENSMUSG00000028453	16.5541	14.0835	23.2249	33.8665	21.1352	19.3554	62.2778	72.9538	78.2284	66.0822	73.7781	80.0835	21.37	72.234	-1.77899	9.24069e-15	1.6293e-13	Fancg	4	43002343	43010506	-	3795	protein_coding	Fanconi anemia, complementation group G [Source:MGI Symbol;Acc:MGI:1926471]	-
ENSMUSG00000043987	39.9246	40.2387	30.9665	23.446	26.1082	64.8977	163.799	163.932	178.69	266.661	109.767	144.696	37.597	171.258	-2.18154	9.29924e-15	1.63837e-13	Cep164	9	45766946	45828691	-	9996	protein_coding	centrosomal protein 164 [Source:MGI Symbol;Acc:MGI:2384878]	-
ENSMUSG00000028344	40.8984	46.2745	38.7082	41.6819	28.5947	53.5121	127.115	139.9	190.219	246.448	118.765	120.125	41.6116	157.095	-1.91489	9.36786e-15	1.64919e-13	Invs	4	48279760	48431954	+	11431	protein_coding	inversin [Source:MGI Symbol;Acc:MGI:1335082]	-
ENSMUSG00000029322	3449.1	5388.96	3166.33	1271.3	1714.44	7482.59	410.351	525.268	568.185	532.545	146.656	348.545	3745.45	421.925	3.14998	9.50212e-15	1.67154e-13	Plac8	5	100553725	100572245	-	1592	protein_coding	placenta-specific 8 [Source:MGI Symbol;Acc:MGI:2445289]	-
ENSMUSG00000054967	4.86886	7.04177	3.87082	1.30256	6.21624	11.3856	40.9498	47.2054	33.7617	33.4298	39.5883	40.9518	5.78097	39.3145	-2.74047	9.53695e-15	1.67638e-13	Zfp647	15	76910371	76925448	-	2669	protein_coding	zinc finger protein 647 [Source:MGI Symbol;Acc:MGI:3052806]	zf-C2H2
ENSMUSG00000080845	109.062	107.638	138.059	147.189	114.379	117.271	47.7747	44.6306	54.3482	51.3109	28.7915	37.3116	122.267	44.0279	1.46592	9.95251e-15	1.74809e-13	Gm9115	X	102724402	102725749	-	1348	processed_pseudogene	predicted gene 9115 [Source:MGI Symbol;Acc:MGI:3648181]	-
ENSMUSG00000031070	41.8722	28.1671	1.29027	19.5384	8.70274	36.4338	271.292	242.893	590.419	494.45	190.743	167.447	22.6674	326.208	-3.83619	1.07955e-14	1.89325e-13	Mrgprf	7	145300828	145309557	+	2214	protein_coding	MAS-related GPR, member F [Source:MGI Symbol;Acc:MGI:2384823]	-
ENSMUSG00000070691	111.01	91.543	82.5774	66.4304	59.6759	101.331	11.9437	12.0159	32.9383	8.55182	14.3957	14.5606	85.428	15.7343	2.44319	1.10896e-14	1.94335e-13	Runx3	4	135120652	135177990	+	5003	protein_coding	runt related transcription factor 3 [Source:MGI Symbol;Acc:MGI:102672]	Runt
ENSMUSG00000055447	8817.5	9114.06	5514.62	4484.71	4779.05	11368.5	1693.44	2026.4	2425.9	2347.86	1714.89	1714.52	7346.4	1987.17	1.88635	1.14366e-14	2.00262e-13	Cd47	16	49800533	49915010	+	6276	protein_coding	CD47 antigen (Rh-related antigen, integrin-associated signal transducer) [Source:MGI Symbol;Acc:MGI:96617]	-
ENSMUSG00000078350	164.567	155.925	123.866	126.348	123.082	215.187	638.134	614.529	1318.35	1743.02	467.861	526.003	151.496	884.65	-2.54515	1.16301e-14	2.03495e-13	Smim1	4	154020470	154026230	-	5761	protein_coding	small integral membrane protein 1 [Source:MGI Symbol;Acc:MGI:1916109]	-
ENSMUSG00000026691	11.6853	17.1014	6.45136	3.90767	7.45949	21.6326	66.5434	111.576	276.682	693.475	87.2741	160.167	11.373	232.62	-4.34328	1.18992e-14	2.08045e-13	Fmo3	1	162953800	162984528	-	2413	protein_coding	flavin containing monooxygenase 3 [Source:MGI Symbol;Acc:MGI:1100496]	-
ENSMUSG00000022584	83.7444	93.5549	78.7066	76.8509	82.0544	46.6808	11.9437	6.00796	27.1741	6.2195	11.6965	9.1004	76.932	12.0237	2.6767	1.20643e-14	2.1059e-13	Ly6c2	15	75108158	75111970	-	2740	protein_coding	lymphocyte antigen 6 complex, locus C2 [Source:MGI Symbol;Acc:MGI:3712069]	-
ENSMUSG00000018476	1640.81	1719.2	1356.08	1213.98	1239.52	1171.57	680.79	569.898	556.657	766.554	514.647	506.892	1390.19	599.24	1.21417	1.20722e-14	2.1059e-13	Kdm6b	11	69398508	69413675	-	6954	protein_coding	KDM1 lysine (K)-specific demethylase 6B [Source:MGI Symbol;Acc:MGI:2448492]	-
ENSMUSG00000021280	127.564	140.835	135.479	148.492	124.325	151.428	46.0685	45.4889	63.4062	27.9878	61.1819	48.2321	138.02	48.7275	1.50465	1.25475e-14	2.18713e-13	Exoc3l4	12	111417017	111431678	+	5650	protein_coding	exocyst complex component 3-like 4 [Source:MGI Symbol;Acc:MGI:1921363]	-
ENSMUSG00000021294	22.3967	14.0835	1.29027	15.6307	8.70274	5.69278	171.477	160.498	52.7012	94.8474	82.7754	133.776	11.2995	116.013	-3.3401	1.26213e-14	2.19833e-13	Kif26a	12	112146208	112181747	+	6918	protein_coding	kinesin family member 26A [Source:MGI Symbol;Acc:MGI:2447072]	-
ENSMUSG00000044156	1.94754	4.02387	0	0	0	1.13856	25.5936	42.0557	43.6432	31.8749	31.4907	37.3116	1.18499	35.3283	-4.74386	1.28241e-14	2.23197e-13	Hepacam2	6	3457096	3498298	-	5874	protein_coding	HEPACAM family member 2 [Source:MGI Symbol;Acc:MGI:2141520]	-
ENSMUSG00000029710	363.217	318.891	225.798	226.645	172.812	286.916	739.655	614.529	676.882	790.654	754.876	629.748	265.713	701.057	-1.39659	1.33079e-14	2.3144e-13	Ephb4	5	137350109	137378669	+	4640	protein_coding	Eph receptor B4 [Source:MGI Symbol;Acc:MGI:104757]	-
ENSMUSG00000069793	660.217	830.928	335.471	141.979	184.001	668.332	19.6218	35.1895	60.1124	79.2987	23.3931	40.9518	470.155	43.0945	3.44638	1.34125e-14	2.33083e-13	Slfn9	11	82978390	82991830	-	5965	protein_coding	schlafen 9 [Source:MGI Symbol;Acc:MGI:2445121]	-
ENSMUSG00000041483	1314.59	1091.47	913.513	709.894	809.355	1301.37	428.266	369.919	352.44	465.685	394.083	349.455	1023.37	393.308	1.3801	1.37702e-14	2.39118e-13	Zfp281	1	136624901	136630053	+	4937	protein_coding	zinc finger protein 281 [Source:MGI Symbol;Acc:MGI:3029290]	zf-C2H2
ENSMUSG00000029070	684.561	672.992	361.276	437.659	392.867	748.031	1579.98	1742.31	2748.7	2780.9	1561.04	1724.53	549.564	2022.91	-1.87922	1.40191e-14	2.43257e-13	Mxra8	4	155839680	155844088	+	2918	protein_coding	matrix-remodelling associated 8 [Source:MGI Symbol;Acc:MGI:1922011]	-
ENSMUSG00000025880	129.512	91.543	161.284	122.44	89.5139	99.0543	347.22	355.328	267.624	333.521	314.907	236.61	115.558	309.202	-1.42225	1.41253e-14	2.44913e-13	Smad7	18	75367529	75395935	+	4521	protein_coding	SMAD family member 7 [Source:MGI Symbol;Acc:MGI:1100518]	MH1
ENSMUSG00000051098	9.73772	12.0716	16.7735	14.3281	31.0812	11.3856	66.5434	108.143	76.5815	68.4145	68.3797	63.7028	15.8963	75.2942	-2.2631	1.43726e-14	2.49014e-13	Mblac2	13	81711341	81753275	+	3957	protein_coding	metallo-beta-lactamase domain containing 2 [Source:MGI Symbol;Acc:MGI:1920102]	-
ENSMUSG00000022009	557.971	550.264	717.391	765.904	657.678	815.206	273.852	285.807	313.737	248.78	374.289	320.334	677.402	302.8	1.16138	1.45421e-14	2.51759e-13	Nufip1	14	76110891	76137379	+	3974	protein_coding	nuclear fragile X mental retardation protein interacting protein 1 [Source:MGI Symbol;Acc:MGI:1351474]	-
ENSMUSG00000022504	37.0033	25.1492	30.9665	15.6307	4.97299	26.1868	105.787	133.033	182.807	151.6	96.2714	119.215	23.3182	131.452	-2.48388	1.48198e-14	2.56373e-13	Ciita	16	10480059	10528418	+	9535	protein_coding	class II transactivator [Source:MGI Symbol;Acc:MGI:108445]	-
ENSMUSG00000048706	107.115	81.4833	37.4179	41.6819	50.9732	127.518	383.051	477.204	555.833	800.761	296.012	293.033	74.3649	467.649	-2.64824	1.54216e-14	2.66382e-13	Lurap1l	4	80910646	80955628	+	3066	protein_coding	leucine rich adaptor protein 1-like [Source:MGI Symbol;Acc:MGI:106510]	-
ENSMUSG00000041530	195.728	149.889	56.772	78.1535	79.5679	96.7772	544.291	611.954	761.698	978.794	358.994	424.989	109.481	613.453	-2.48188	1.59552e-14	2.75392e-13	Ago1	4	126435012	126468583	-	8120	protein_coding	argonaute RISC catalytic subunit 1 [Source:MGI Symbol;Acc:MGI:2446630]	-
ENSMUSG00000028341	582.315	858.089	956.092	1247.85	397.84	643.284	80.1933	52.3551	182.807	183.475	98.0709	44.592	780.912	106.916	2.86725	1.62566e-14	2.80384e-13	Nr4a3	4	48045153	48086447	+	5987	protein_coding	nuclear receptor subfamily 4, group A, member 3 [Source:MGI Symbol;Acc:MGI:1352457]	NGFIB-like
ENSMUSG00000044701	83.7444	167.996	132.898	18.2358	41.0272	76.2832	8.5312	6.00796	4.94074	9.32925	7.19786	6.37028	86.6975	7.06288	3.61803	1.64123e-14	2.82857e-13	Il27	7	126589010	126594941	-	1021	protein_coding	interleukin 27 [Source:MGI Symbol;Acc:MGI:2384409]	-
ENSMUSG00000037902	550.181	554.288	359.986	448.08	305.839	674.025	1134.65	1343.21	2189.57	2194.71	1462.97	1649.9	482.066	1662.5	-1.7853	1.72702e-14	2.97418e-13	Sirpa	2	129592835	129632228	+	4911	protein_coding	signal-regulatory protein alpha [Source:MGI Symbol;Acc:MGI:108563]	-
ENSMUSG00000031278	2406.19	2616.52	1753.48	1850.93	1700.76	3356.46	980.235	805.925	893.451	842.743	899.733	778.084	2280.72	866.695	1.39615	1.80981e-14	3.11394e-13	Acsl4	X	142317993	142390535	-	5405	protein_coding	acyl-CoA synthetase long-chain family member 4 [Source:MGI Symbol;Acc:MGI:1354713]	-
ENSMUSG00000058715	2290.31	2766.41	2568.93	2077.58	1867.36	3416.8	696.999	760.436	1049.08	944.587	812.459	1214.9	2497.9	913.078	1.45203	1.81089e-14	3.11394e-13	Fcer1g	1	171229572	171234365	-	874	protein_coding	Fc receptor, IgE, high affinity I, gamma polypeptide [Source:MGI Symbol;Acc:MGI:95496]	-
ENSMUSG00000048852	534.601	327.945	1691.55	328.245	417.732	561.308	21.328	49.7803	53.5247	30.3201	116.965	73.7133	643.563	57.6053	3.48291	1.84567e-14	3.17137e-13	Gm12185	11	48904656	48992226	-	5587	protein_coding	predicted gene 12185 [Source:MGI Symbol;Acc:MGI:3652173]	-
ENSMUSG00000026479	1735.26	1348	535.463	638.253	584.327	2772.38	178.302	184.53	163.868	208.353	161.052	193.839	1268.95	181.657	2.80456	2.00864e-14	3.44881e-13	Lamc2	1	153122756	153186447	-	8039	protein_coding	laminin, gamma 2 [Source:MGI Symbol;Acc:MGI:99913]	-
ENSMUSG00000031714	336.925	275.635	307.085	330.85	432.65	285.777	653.49	763.869	951.093	1047.99	745.879	667.059	328.154	804.896	-1.29546	2.0136e-14	3.45474e-13	Gab1	8	80764438	80880519	-	5082	protein_coding	growth factor receptor bound protein 2-associated protein 1 [Source:MGI Symbol;Acc:MGI:108088]	-
ENSMUSG00000018916	45.7673	40.2387	77.4163	28.6563	31.0812	68.3133	0	0	0.823457	0	0.899733	0.91004	48.5788	0.438872	6.83195	2.02091e-14	3.4647e-13	Csf2	11	54247271	54249667	-	800	protein_coding	colony stimulating factor 2 (granulocyte-macrophage) [Source:MGI Symbol;Acc:MGI:1339752]	-
ENSMUSG00000001785	990.326	1104.55	979.317	773.719	1067.95	1307.06	546.85	557.882	493.251	502.225	498.452	513.263	1037.15	518.654	1.00028	2.05804e-14	3.52572e-13	Pwp1	10	85829494	85889096	+	2942	protein_coding	PWP1 homolog, endonuclein [Source:MGI Symbol;Acc:MGI:1914735]	-
ENSMUSG00000030413	111.984	85.5072	85.158	121.138	70.8652	92.223	17.9155	18.0239	32.1148	38.8719	18.8944	20.0209	94.4791	24.3069	1.95182	2.23563e-14	3.82709e-13	Pglyrp1	7	18871331	18890459	+	1837	protein_coding	peptidoglycan recognition protein 1 [Source:MGI Symbol;Acc:MGI:1345092]	-
ENSMUSG00000042406	10773.8	10311.2	13985.3	16090.5	13315.2	12553.7	6177.44	5514.45	5296.48	4360.65	6828.97	6253.8	12838.3	5738.63	1.16165	2.25298e-14	3.85392e-13	Atf4	15	80255184	80257541	+	2358	protein_coding	activating transcription factor 4 [Source:MGI Symbol;Acc:MGI:88096]	TF_bZIP
ENSMUSG00000054364	10336.6	10502.3	8935.13	10118.3	8731.33	8384.32	4559.07	4408.13	4687.12	4703.5	2701	3257.94	9501.32	4052.79	1.22917	2.29363e-14	3.92054e-13	Rhob	12	8497661	8500009	-	2349	protein_coding	ras homolog family member B [Source:MGI Symbol;Acc:MGI:107949]	-
ENSMUSG00000064267	12.659	29.173	24.5152	13.0256	14.919	20.494	67.3965	55.7882	73.2877	73.0792	84.5749	79.1735	19.131	72.2167	-1.91096	2.38961e-14	4.08155e-13	Hvcn1	5	122206804	122242297	+	3563	protein_coding	hydrogen voltage-gated channel 1 [Source:MGI Symbol;Acc:MGI:1921346]	-
ENSMUSG00000073176	72.0591	74.4415	65.8039	67.733	68.3787	70.5904	197.071	150.199	175.396	184.253	147.556	126.496	69.8344	163.495	-1.2262	2.40746e-14	4.10899e-13	Zfp449	X	56346400	56365674	+	3738	protein_coding	zinc finger protein 449 [Source:MGI Symbol;Acc:MGI:1925869]	zf-C2H2
ENSMUSG00000041684	115.879	106.632	157.413	134.163	131.784	111.578	291.767	234.311	251.978	248.78	291.514	248.441	126.242	261.132	-1.05377	2.43959e-14	4.16072e-13	Bivm	1	44118957	44144770	+	4206	protein_coding	basic, immunoglobulin-like variable motif containing [Source:MGI Symbol;Acc:MGI:2179809]	-
ENSMUSG00000024340	6.8164	0	2.58054	1.30256	3.72975	7.96989	31.5654	65.2293	53.5247	34.9847	33.2901	46.412	3.73319	44.1677	-3.54366	2.46582e-14	4.20233e-13	Btnl2	17	34354822	34369493	+	2585	protein_coding	butyrophilin-like 2 [Source:MGI Symbol;Acc:MGI:1859549]	-
ENSMUSG00000030122	2766.49	3388.1	2997.3	2576.46	2534.98	3175.43	4696.43	5216.63	7334.53	7082.46	6231.55	6633.28	2906.46	6199.15	-1.09271	2.5104e-14	4.27514e-13	Ptms	6	124913681	124920103	-	1619	protein_coding	parathymosin [Source:MGI Symbol;Acc:MGI:1916452]	-
ENSMUSG00000035778	1101.34	764.535	495.464	614.807	578.111	937.031	297.739	260.059	223.98	262.774	206.939	252.081	748.547	250.595	1.57958	2.5332e-14	4.31076e-13	Ggta1	2	35400179	35463231	-	4709	protein_coding	glycoprotein galactosyltransferase alpha 1, 3 [Source:MGI Symbol;Acc:MGI:95704]	-
ENSMUSG00000074874	19.4754	36.2148	21.9346	35.1691	18.6487	36.4338	3.41248	0.85828	0.823457	0.777438	0.899733	1.82008	27.9794	1.43191	4.29961	2.54388e-14	4.32573e-13	Ctla2b	13	60895350	60897447	-	1723	protein_coding	cytotoxic T lymphocyte-associated protein 2 beta [Source:MGI Symbol;Acc:MGI:88555]	-
ENSMUSG00000030446	24.3443	18.1074	32.2568	19.5384	9.94599	11.3856	86.1651	90.9777	72.4642	92.5151	63.8811	68.253	19.2631	79.0427	-2.03898	2.58917e-14	4.39948e-13	Zfp273	13	67813740	67827002	+	3799	protein_coding	zinc finger protein 273 [Source:MGI Symbol;Acc:MGI:3036278]	zf-C2H2
ENSMUSG00000020089	3617.56	3108.44	3285.03	3003.7	2727.69	4531.45	1622.63	1496.84	1515.98	1014.56	1565.54	1461.52	3378.98	1446.18	1.22454	2.7712e-14	4.70182e-13	Ppa1	10	61648552	61674168	+	2902	protein_coding	pyrophosphatase (inorganic) 1 [Source:MGI Symbol;Acc:MGI:97831]	-
ENSMUSG00000114277	264.866	348.064	429.661	310.009	264.812	396.217	97.2557	92.6943	127.636	118.948	143.058	158.347	335.605	122.99	1.44855	2.82573e-14	4.79079e-13	Gm48583	13	60641790	60642009	+	220	processed_pseudogene	predicted gene, 48583 [Source:MGI Symbol;Acc:MGI:6098152]	-
novel.412	894.896	915.43	437.402	470.223	336.92	628.483	121.996	163.932	147.399	205.244	140.358	165.627	613.892	157.426	1.96407	2.9095e-14	4.92918e-13	-	6	41196226	41202109	-	5884	-	- && P31792.1 RecName: Full=Pol polyprotein; Contains: RecName: Full=Reverse transcriptase/ribonuclease H; Short=RT; Contains: RecName: Full=Integrase; Short=IN && -	-
ENSMUSG00000018217	1861.85	2461.6	1603.81	1625.59	1228.33	1209.15	3955.07	4039.93	5564.1	5808.24	4140.57	4602.07	1665.05	4685	-1.4922	3.12747e-14	5.29455e-13	Pmp22	11	63128982	63159547	+	2354	protein_coding	peripheral myelin protein 22 [Source:MGI Symbol;Acc:MGI:97631]	-
ENSMUSG00000062980	283.368	357.118	260.635	115.928	237.46	189	894.923	1109.76	738.641	890.166	726.085	702.551	240.585	843.687	-1.80822	3.17204e-14	5.36604e-13	Cped1	6	21985916	22256404	+	8279	protein_coding	cadherin-like and PC-esterase domain containing 1 [Source:MGI Symbol;Acc:MGI:2444814]	-
ENSMUSG00000000392	361.269	441.619	313.536	341.27	285.947	420.127	652.637	726.963	722.995	814.755	934.823	856.348	360.628	784.753	-1.11995	3.26079e-14	5.5121e-13	Fap	2	62500943	62574075	-	5662	protein_coding	fibroblast activation protein [Source:MGI Symbol;Acc:MGI:109608]	-
ENSMUSG00000007827	31.1607	39.2327	14.193	15.6307	21.1352	23.9097	101.521	96.1274	78.2284	157.82	113.366	91.004	24.2103	106.345	-2.11622	3.34134e-14	5.64411e-13	Ankrd26	6	118501308	118562226	-	7253	protein_coding	ankyrin repeat domain 26 [Source:MGI Symbol;Acc:MGI:1917887]	-
ENSMUSG00000026475	530.706	409.428	460.627	296.983	326.974	291.47	44.3622	129.6	73.2877	18.6585	47.6859	47.3221	386.031	60.1528	2.683	3.34577e-14	5.64743e-13	Rgs16	1	153740349	153745468	+	2339	protein_coding	regulator of G-protein signaling 16 [Source:MGI Symbol;Acc:MGI:108407]	-
ENSMUSG00000024696	334.004	654.884	296.763	251.394	232.487	472.501	57.1591	88.4029	113.637	94.07	70.1792	98.2843	373.672	86.9554	2.10425	3.44391e-14	5.80881e-13	Lpxn	19	12798606	12833807	+	1675	protein_coding	leupaxin [Source:MGI Symbol;Acc:MGI:2147677]	-
ENSMUSG00000075415	269.735	304.808	198.702	158.912	166.595	261.868	588.653	688.341	747.699	963.245	502.051	686.17	226.77	696.027	-1.61545	3.48633e-14	5.87321e-13	Fnbp1	2	31026206	31142008	-	10030	protein_coding	formin binding protein 1 [Source:MGI Symbol;Acc:MGI:109606]	-
ENSMUSG00000079547	79.8493	147.877	166.445	72.9432	58.4327	161.675	360.87	527.842	618.416	508.444	376.988	605.177	114.537	499.623	-2.12452	3.48721e-14	5.87321e-13	H2-DMb1	17	34153072	34160230	+	1485	protein_coding	histocompatibility 2, class II, locus Mb1 [Source:MGI Symbol;Acc:MGI:95922]	-
ENSMUSG00000042073	65.2427	56.3341	52.9012	32.5639	48.4867	47.8193	145.884	199.979	155.633	181.143	105.269	142.876	50.558	155.131	-1.61064	3.76188e-14	6.32652e-13	Abhd14b	9	106447459	106452923	+	2671	protein_coding	abhydrolase domain containing 14b [Source:MGI Symbol;Acc:MGI:1923741]	-
ENSMUSG00000038893	143.144	97.5788	65.8039	79.456	63.4057	109.301	357.457	393.092	849.808	1040.99	317.606	362.196	93.115	553.525	-2.56893	3.76633e-14	6.32936e-13	Fam117a	11	95337018	95381872	+	3029	protein_coding	family with sequence similarity 117, member A [Source:MGI Symbol;Acc:MGI:2144564]	-
ENSMUSG00000036402	7454.22	7161.48	4144.35	3301.98	3457.47	8068.94	1347.93	1308.02	1679.03	1897.73	1116.57	1084.77	5598.08	1405.67	1.99368	3.81454e-14	6.4057e-13	Gng12	6	66896397	67021350	+	4727	protein_coding	guanine nucleotide binding protein (G protein), gamma 12 [Source:MGI Symbol;Acc:MGI:1336171]	-
ENSMUSG00000001313	59.4001	86.5131	94.1899	98.9944	79.5679	58.0663	169.771	202.554	203.394	185.03	188.944	177.458	79.4553	187.858	-1.24831	3.87079e-14	6.49539e-13	Rnd2	11	101464999	101471853	+	1990	protein_coding	Rho family GTPase 2 [Source:MGI Symbol;Acc:MGI:1338755]	-
ENSMUSG00000074863	37.0033	28.1671	50.3206	26.0512	37.2975	44.4037	87.0183	122.734	93.8741	116.616	105.269	113.755	37.2072	106.544	-1.52149	3.91646e-14	6.56723e-13	Platr25	13	62671784	62760709	-	6180	protein_coding	pluripotency associated transcript 25 [Source:MGI Symbol;Acc:MGI:3645613]	-
ENSMUSG00000112627	170.41	202.199	170.316	106.81	105.676	208.356	30.7123	33.4729	62.5827	40.4268	50.3851	44.592	160.628	43.6953	1.88043	4.01876e-14	6.73385e-13	4933412E12Rik	10	116949757	116963279	+	2434	bidirectional_promoter_lncRNA	RIKEN cDNA 4933412E12 gene [Source:MGI Symbol;Acc:MGI:1918336]	-
ENSMUSG00000068246	1339.91	1364.09	1033.51	442.87	813.085	3076.38	52.0403	132.175	233.038	178.811	60.2821	46.412	1344.97	117.126	3.52073	4.47346e-14	7.4848e-13	Apol9b	15	77729039	77736382	+	1821	protein_coding	apolipoprotein L 9b [Source:MGI Symbol;Acc:MGI:1919148]	-
ENSMUSG00000021692	259.023	259.539	289.021	310.009	320.758	450.868	100.668	87.5446	100.462	108.841	161.952	114.665	314.87	112.355	1.48708	4.51416e-14	7.5474e-13	Dimt1	13	106947127	106960224	+	3851	protein_coding	DIM1 dimethyladenosine transferase 1-like (S. cerevisiae) [Source:MGI Symbol;Acc:MGI:1913504]	-
ENSMUSG00000042901	5481.36	6901.94	3682.44	2433.18	3287.15	6895.09	1131.24	1207.6	1268.95	1449.14	1326.21	1432.4	4780.19	1302.59	1.87581	4.52807e-14	7.56514e-13	Aida	1	183296590	183325476	+	6175	protein_coding	axin interactor, dorsalization associated [Source:MGI Symbol;Acc:MGI:1919737]	-
ENSMUSG00000032021	16.5541	42.2506	58.0622	32.5639	37.2975	47.8193	0	1.71656	1.64691	0	0	0	39.0913	0.560579	6.10381	4.61601e-14	7.70646e-13	Crtam	9	40969691	41004628	-	5131	protein_coding	cytotoxic and regulatory T cell molecule [Source:MGI Symbol;Acc:MGI:1859822]	-
ENSMUSG00000035469	280.446	255.515	229.668	256.604	282.217	237.958	546.85	573.331	595.359	653.048	428.273	437.729	257.068	539.098	-1.0684	4.63414e-14	7.7311e-13	Rcbtb1	14	59201209	59237265	+	6010	protein_coding	regulator of chromosome condensation (RCC1) and BTB (POZ) domain containing protein 1 [Source:MGI Symbol;Acc:MGI:1918580]	-
ENSMUSG00000026466	5426.83	6554.88	4203.71	3505.18	3977.15	6380.46	2125.98	2131.97	1875.83	2060.99	1961.42	2114.93	5008.04	2045.19	1.29219	4.85319e-14	8.08477e-13	Tor1aip1	1	156004599	156036480	-	5406	protein_coding	torsin A interacting protein 1 [Source:MGI Symbol;Acc:MGI:3582693]	-
ENSMUSG00000001663	288.236	276.641	178.058	126.348	114.379	373.446	830.939	1130.36	1598.33	1819.2	770.172	1010.14	226.185	1193.19	-2.3977	4.85681e-14	8.08494e-13	Gstt1	10	75783813	75798584	-	1528	protein_coding	glutathione S-transferase, theta 1 [Source:MGI Symbol;Acc:MGI:107379]	-
ENSMUSG00000024228	82.7706	72.4296	87.7385	88.5739	85.7841	68.3133	259.349	290.099	182.807	199.024	170.05	177.458	80.935	213.131	-1.3995	4.9249e-14	8.19234e-13	Nudt12	17	58999618	59013372	-	4401	protein_coding	nudix (nucleoside diphosphate linked moiety X)-type motif 12 [Source:MGI Symbol;Acc:MGI:1915243]	-
ENSMUSG00000023903	88.6132	125.746	101.931	37.7742	34.811	81.976	1.70624	1.71656	8.23457	11.6616	11.6965	4.5502	78.4753	6.59428	3.57018	4.97156e-14	8.26396e-13	Mmp25	17	23628311	23645277	-	5303	protein_coding	matrix metallopeptidase 25 [Source:MGI Symbol;Acc:MGI:2443938]	-
ENSMUSG00000027327	248.312	246.462	383.211	356.901	221.298	222.018	593.772	757.861	730.406	620.395	771.971	900.03	279.7	729.073	-1.38394	5.12226e-14	8.50829e-13	1700037H04Rik	2	131146324	131160081	-	2286	protein_coding	RIKEN cDNA 1700037H04 gene [Source:MGI Symbol;Acc:MGI:1914576]	-
ENSMUSG00000097534	169.436	205.217	69.6747	66.4304	94.4869	273.253	23.8874	21.457	23.8803	26.4329	13.496	20.0209	146.416	21.5291	2.76611	5.19033e-14	8.61512e-13	Gm16675	8	46668808	46739515	-	3486	bidirectional_promoter_lncRNA	predicted gene, 16675 [Source:MGI Symbol;Acc:MGI:4439599]	-
ENSMUSG00000074865	22.3967	26.1551	32.2568	24.7486	17.4055	30.741	71.6621	76.3869	76.5815	63.7499	89.0736	75.5333	25.6173	75.4979	-1.56022	5.2495e-14	8.70704e-13	Zfp934	13	62479827	62571199	-	5764	protein_coding	zinc finger protein 934 [Source:MGI Symbol;Acc:MGI:1924367]	zf-C2H2
ENSMUSG00000001157	113.931	117.698	91.6093	87.2714	72.1084	88.8073	196.218	208.562	227.274	246.448	221.334	189.288	95.2376	214.854	-1.16727	5.27127e-14	8.73682e-13	Gmcl1	6	86691768	86733383	-	6493	protein_coding	germ cell-less, spermatogenesis associated 1 [Source:MGI Symbol;Acc:MGI:1345156]	-
novel.317	257.076	240.426	327.729	397.28	294.65	142.319	82.7527	73.8121	46.937	35.7621	80.976	77.3534	276.58	66.2656	2.06231	5.5372e-14	9.17096e-13	-	4	8942804	8951766	+	5591	-	- && - && -	-
ENSMUSG00000059277	19.4754	8.04773	24.5152	23.446	24.865	12.5241	64.8371	57.5048	77.405	83.9633	86.3744	73.7133	18.8122	73.9663	-1.99492	5.55318e-14	9.19079e-13	R74862	7	143021784	143053686	-	3889	processed_transcript	expressed sequence R74862 [Source:MGI Symbol;Acc:MGI:2142382]	-
ENSMUSG00000037428	38.9509	21.1253	24.5152	11.723	24.865	34.1567	0	0	0	0.777438	0	0	25.8893	0.129573	6.89258	6.03641e-14	9.98336e-13	Vgf	5	137026392	137033351	+	2973	protein_coding	VGF nerve growth factor inducible [Source:MGI Symbol;Acc:MGI:1343180]	-
ENSMUSG00000041747	513.178	482.864	415.468	390.767	441.353	642.145	213.28	210.279	232.215	241.783	216.836	251.171	480.962	227.594	1.08061	6.1137e-14	1.01039e-12	Utp15	13	98246845	98263041	-	5847	protein_coding	UTP15 small subunit processome component [Source:MGI Symbol;Acc:MGI:2145443]	-
ENSMUSG00000027173	251.233	189.122	330.31	217.527	247.406	261.868	101.521	99.5605	93.8741	97.1797	129.562	113.755	249.578	105.909	1.23649	6.34088e-14	1.04718e-12	Depdc7	2	104721784	104742878	-	2096	protein_coding	DEP domain containing 7 [Source:MGI Symbol;Acc:MGI:2139258]	-
ENSMUSG00000029036	1290.25	1235.33	1303.17	1375.5	1291.74	1632.69	704.677	696.924	520.425	530.99	727.884	779.904	1354.78	660.134	1.03763	6.64144e-14	1.09603e-12	Atad3a	4	155740641	155761093	-	3765	protein_coding	ATPase family, AAA domain containing 3A [Source:MGI Symbol;Acc:MGI:1919214]	-
ENSMUSG00000028869	1512.27	1401.31	1296.72	1042.05	1177.36	1443.69	562.206	526.126	632.415	813.2	546.138	585.156	1312.23	610.873	1.10313	6.65551e-14	1.09756e-12	Gnl2	4	125016585	125055380	+	3683	protein_coding	guanine nucleotide binding protein-like 2 (nucleolar) [Source:MGI Symbol;Acc:MGI:2385207]	-
ENSMUSG00000115219	224.941	190.128	218.056	179.753	218.812	322.211	63.984	93.5525	66.7	59.8627	104.369	83.7237	225.65	78.6987	1.52214	6.70539e-14	1.10499e-12	Eef1akmt4	16	20611593	20619011	+	1614	protein_coding	EEF1A lysine methyltransferase 4 [Source:MGI Symbol;Acc:MGI:5903914]	-
ENSMUSG00000021127	2563.94	2253.36	2086.37	1973.38	1774.12	2685.85	839.47	926.084	1107.55	1180.15	750.377	691.631	2222.84	915.877	1.27906	6.8581e-14	1.12935e-12	Zfp36l1	12	80107754	80113013	-	2990	protein_coding	zinc finger protein 36, C3H type-like 1 [Source:MGI Symbol;Acc:MGI:107946]	-
novel.493	90.5608	106.632	860.611	82.0611	552.002	770.802	13.6499	4.2914	0	1.55488	5.3984	2.73012	410.445	4.60412	6.48086	7.31941e-14	1.20272e-12	-	GL456350.1	192828	194903	-	873	-	- && O70460.1 RecName: Full=C-C motif chemokine 19; AltName: Full=Epstein-Barr virus-induced molecule 1 ligand chemokine; Short=EBI1 ligand chemokine; Short=ELC; AltName: Full=Small-inducible cytokine A19; Flags: Precursor && PF00048:Small cytokines (inte	-
ENSMUSG00000023827	142.171	132.788	89.0288	128.953	70.8652	129.795	262.761	293.532	370.556	419.816	281.616	350.365	115.6	329.774	-1.50889	7.36674e-14	1.20963e-12	Agpat4	17	12118704	12219645	+	2701	protein_coding	1-acylglycerol-3-phosphate O-acyltransferase 4 (lysophosphatidic acid acyltransferase, delta) [Source:MGI Symbol;Acc:MGI:1915512]	-
ENSMUSG00000036622	424.564	407.416	437.402	405.095	412.759	237.958	895.776	851.414	909.92	1089.19	794.464	818.126	387.533	893.148	-1.20496	7.53478e-14	1.23546e-12	Atp13a2	4	140986873	141007330	+	6000	protein_coding	ATPase type 13A2 [Source:MGI Symbol;Acc:MGI:1922022]	-
ENSMUSG00000049482	436.25	427.536	576.752	553.587	483.624	545.368	279.823	243.752	232.215	192.805	260.923	273.012	503.853	247.088	1.02755	7.59625e-14	1.24465e-12	Ctu2	8	122476143	122484138	+	5164	protein_coding	cytosolic thiouridylase subunit 2 [Source:MGI Symbol;Acc:MGI:1914215]	-
ENSMUSG00000052760	137.302	157.937	116.124	96.3893	129.298	161.675	23.0342	43.7723	46.1136	40.4268	53.0843	50.9622	133.121	42.8989	1.63826	7.75198e-14	1.26926e-12	A630001G21Rik	1	85717083	85778643	-	2709	protein_coding	RIKEN cDNA A630001G21 gene [Source:MGI Symbol;Acc:MGI:2443131]	-
ENSMUSG00000019880	20.4492	44.2625	30.9665	35.1691	17.4055	42.1266	81.0464	143.333	132.577	113.506	107.968	148.337	31.7299	121.128	-1.93061	7.77579e-14	1.27225e-12	Rspo3	10	29452416	29535867	-	3090	protein_coding	R-spondin 3 [Source:MGI Symbol;Acc:MGI:1920030]	-
ENSMUSG00000056025	70.1116	95.5668	76.1261	56.01	82.0544	51.235	23.0342	20.5987	12.3519	13.9939	11.6965	25.4811	71.8506	17.8594	2.01422	7.79359e-14	1.27425e-12	Clca3a1	3	144729677	144760977	-	3899	protein_coding	chloride channel accessory 3A1 [Source:MGI Symbol;Acc:MGI:1316732]	-
ENSMUSG00000074647	47.7148	56.3341	16.7735	35.1691	26.1082	40.988	1.70624	0	0	0.777438	0.899733	0	37.1813	0.563902	6.04215	7.83032e-14	1.27934e-12	Fam83c	2	155827548	155834854	-	3972	protein_coding	family with sequence similarity 83, member C [Source:MGI Symbol;Acc:MGI:1918655]	-
ENSMUSG00000044338	48.6886	51.3043	27.0957	11.723	9.94599	25.0482	348.073	196.546	128.459	137.606	484.056	446.83	28.9676	290.262	-3.31378	7.87921e-14	1.28641e-12	Aplnr	2	85136225	85139923	+	3699	protein_coding	apelin receptor [Source:MGI Symbol;Acc:MGI:1346086]	-
ENSMUSG00000041798	828.68	774.594	852.87	1288.23	1246.98	603.434	325.039	256.626	119.401	125.945	116.066	86.4538	932.464	171.588	2.44178	7.95955e-14	1.29861e-12	Gck	11	5900820	5950081	-	3033	protein_coding	glucokinase [Source:MGI Symbol;Acc:MGI:1270854]	-
ENSMUSG00000068735	2034.21	1314.8	1032.22	1266.09	959.788	885.796	329.304	217.145	385.378	485.121	215.936	208.399	1248.82	306.881	2.02448	8.21557e-14	1.33847e-12	Trp53i11	2	93187548	93201759	+	3690	protein_coding	transformation related protein 53 inducible protein 11 [Source:MGI Symbol;Acc:MGI:2670995]	-
ENSMUSG00000025647	5818.29	5691.76	4355.96	3071.43	3406.5	6860.94	1099.67	1206.74	1956.53	1825.42	1077.88	1298.63	4867.48	1410.81	1.78664	8.78964e-14	1.42997e-12	Shisa5	9	109038565	109057777	+	3297	protein_coding	shisa family member 5 [Source:MGI Symbol;Acc:MGI:1915044]	-
novel.2	7.79017	2.01193	9.0319	5.21023	6.21624	4.55422	27.2998	37.7643	37.0556	43.5365	33.2901	52.7823	5.80245	38.6215	-2.74938	8.86344e-14	1.44095e-12	-	1	40404857	40412731	+	1539	-	- && P11369.2 RecName: Full=LINE-1 retrotransposable element ORF2 protein; Short=ORF2p; AltName: Full=Long interspersed element-1; Short=L1; AltName: Full=Retrovirus-related Pol polyprotein LINE-1; Includes: RecName: Full=Reverse transcriptase; Includes:	-
ENSMUSG00000050222	78.8755	89.531	34.8373	88.5739	39.784	95.6387	238.874	260.917	256.095	241.783	211.437	256.631	71.2067	244.29	-1.77336	9.06274e-14	1.47231e-12	Il17d	14	57524777	57543166	+	1274	protein_coding	interleukin 17D [Source:MGI Symbol;Acc:MGI:2446510]	-
ENSMUSG00000033581	1181.18	869.155	492.884	346.48	404.056	1425.47	77.6339	61.7962	160.574	138.384	35.0896	43.6819	786.539	86.1933	3.18888	9.11672e-14	1.48003e-12	Igf2bp2	16	22059009	22163299	-	7402	protein_coding	insulin-like growth factor 2 mRNA binding protein 2 [Source:MGI Symbol;Acc:MGI:1890358]	-
ENSMUSG00000027223	99.3247	173.026	127.737	97.6918	55.9462	81.976	336.129	429.14	640.65	611.844	329.302	342.175	105.95	448.207	-2.07906	9.1909e-14	1.49102e-12	Mapk8ip1	2	92383676	92401263	-	4644	protein_coding	mitogen-activated protein kinase 8 interacting protein 1 [Source:MGI Symbol;Acc:MGI:1309464]	-
ENSMUSG00000040302	270.709	309.838	343.212	397.28	407.786	300.579	143.324	164.79	154.81	140.716	188.044	160.167	338.234	158.642	1.09083	9.32885e-14	1.51233e-12	Rbm48	5	3583978	3596585	-	3071	protein_coding	RNA binding motif protein 48 [Source:MGI Symbol;Acc:MGI:2442653]	-
ENSMUSG00000038463	351.532	532.156	247.732	304.799	190.217	405.326	975.116	1090.87	1397.41	1148.28	949.218	1031.08	338.627	1098.66	-1.69632	1.00649e-13	1.62935e-12	Olfml2b	1	170644532	170682789	+	3095	protein_coding	olfactomedin-like 2B [Source:MGI Symbol;Acc:MGI:2443310]	-
ENSMUSG00000032496	37.9771	71.4236	21.9346	28.6563	22.3785	51.235	0	0	3.29383	0	0	0.91004	38.9342	0.700645	5.7868	1.02679e-13	1.65986e-12	Ltf	9	111019271	111042767	+	3450	protein_coding	lactotransferrin [Source:MGI Symbol;Acc:MGI:96837]	-
ENSMUSG00000032845	2572.7	2707.06	2021.86	2196.11	2270.17	1329.83	871.036	790.476	442.196	503.002	873.641	688.9	2182.96	694.875	1.65177	1.03286e-13	1.6685e-12	Alpk2	18	65265529	65393888	-	7782	protein_coding	alpha-kinase 2 [Source:MGI Symbol;Acc:MGI:2449492]	-
ENSMUSG00000022364	18.5017	11.0656	23.2249	9.1179	8.70274	12.5241	81.0464	93.5525	78.2284	90.9602	41.3877	51.8723	13.8562	72.8413	-2.39357	1.03899e-13	1.67722e-12	Tbc1d31	15	57912199	57970067	+	6366	protein_coding	TBC1 domain family, member 31 [Source:MGI Symbol;Acc:MGI:2684931]	-
ENSMUSG00000027863	6.8164	8.04773	6.45136	2.60512	0	19.3554	43.5091	72.0955	93.0506	55.9755	70.1792	82.8137	7.21268	69.6039	-3.24939	1.0617e-13	1.71269e-12	Cd2	3	101275899	101287939	-	1741	protein_coding	CD2 antigen [Source:MGI Symbol;Acc:MGI:88320]	-
ENSMUSG00000032012	31.1607	42.2506	10.3222	16.9333	17.4055	42.1266	110.053	140.758	179.514	248.003	127.762	115.575	26.6998	153.611	-2.51093	1.06393e-13	1.71507e-12	Nectin1	9	43743984	43807461	+	5653	protein_coding	nectin cell adhesion molecule 1 [Source:MGI Symbol;Acc:MGI:1926483]	-
ENSMUSG00000039431	83.7444	66.3938	56.772	53.4049	69.6219	71.729	13.6499	18.8822	26.3506	13.9939	7.19786	19.1108	66.9443	16.5309	2.01891	1.07422e-13	1.73044e-12	Mtmr7	8	40551095	40634797	-	4454	protein_coding	myotubularin related protein 7 [Source:MGI Symbol;Acc:MGI:1891693]	-
ENSMUSG00000041479	0.973772	5.02983	3.87082	1.30256	1.24325	2.27711	63.1309	56.6465	28.821	37.317	24.2928	24.5711	2.44956	39.1299	-3.98627	1.13362e-13	1.82486e-12	Syt15	14	34219595	34230420	+	5164	protein_coding	synaptotagmin XV [Source:MGI Symbol;Acc:MGI:2442166]	-
ENSMUSG00000071350	668.007	827.91	388.372	244.881	353.083	827.73	107.493	155.349	124.342	129.055	109.767	91.004	551.664	119.502	2.20736	1.14887e-13	1.8481e-12	Setdb2	14	59402009	59440884	-	4047	protein_coding	SET domain, bifurcated 2 [Source:MGI Symbol;Acc:MGI:2685139]	MBD
ENSMUSG00000021384	9.73772	15.0895	21.9346	20.8409	11.1892	21.6326	71.6621	101.277	125.165	170.259	52.1845	70.9831	16.7374	98.5885	-2.56985	1.16829e-13	1.87803e-12	Susd3	13	49230690	49248706	-	2837	protein_coding	sushi domain containing 3 [Source:MGI Symbol;Acc:MGI:1913579]	-
ENSMUSG00000028082	376.85	198.175	101.931	113.323	75.8382	284.639	1034.83	1111.47	1477.28	1603.08	854.746	994.674	191.793	1179.35	-2.61793	1.17898e-13	1.89388e-12	Sh3d19	3	85971109	86130526	+	8888	protein_coding	SH3 domain protein D19 [Source:MGI Symbol;Acc:MGI:1350923]	-
ENSMUSG00000052446	53.5574	61.364	38.7082	46.8921	37.2975	66.0362	129.674	147.624	144.928	138.384	102.57	149.247	50.6426	135.404	-1.41041	1.20993e-13	1.94088e-12	Zfp961	8	71951038	71993792	+	4334	protein_coding	zinc finger protein 961 [Source:MGI Symbol;Acc:MGI:3583954]	zf-C2H2
ENSMUSG00000044149	171.384	208.235	181.928	183.661	206.379	281.223	83.6058	58.3631	79.0519	87.8505	101.67	76.4434	205.468	81.1641	1.34029	1.22972e-13	1.97125e-12	Nkrf	X	36887540	36902899	-	3268	protein_coding	NF-kappaB repressing factor [Source:MGI Symbol;Acc:MGI:1924536]	-
ENSMUSG00000008167	74.9804	47.2804	73.5455	36.4716	57.1894	75.1447	142.471	145.908	167.162	165.594	181.746	182.008	60.7687	164.148	-1.43016	1.23375e-13	1.97633e-12	Fbxw9	8	85060055	85067124	+	3383	protein_coding	F-box and WD-40 domain protein 9 [Source:MGI Symbol;Acc:MGI:1915878]	-
ENSMUSG00000037169	6.8164	1.00597	0	5.21023	0	2.27711	40.0966	31.7564	41.9963	80.0761	71.9786	26.3912	2.55162	48.7159	-4.21544	1.25108e-13	2.00269e-12	Mycn	12	12936093	12941914	-	3295	protein_coding	v-myc avian myelocytomatosis viral related oncogene, neuroblastoma derived [Source:MGI Symbol;Acc:MGI:97357]	bHLH
ENSMUSG00000057346	1423.65	1530.08	1060.6	524.931	806.868	3255.13	62.2778	80.6783	261.859	244.115	79.1765	64.6129	1433.54	132.12	3.43894	1.26187e-13	2.01855e-12	Apol9a	15	77403789	77411135	-	5953	protein_coding	apolipoprotein L 9a [Source:MGI Symbol;Acc:MGI:3606001]	-
ENSMUSG00000006641	138.276	140.835	107.093	105.507	129.298	125.241	295.18	461.755	354.91	313.307	225.833	292.123	124.375	323.851	-1.37809	1.29697e-13	2.07326e-12	Slc5a6	5	31036036	31048924	-	3991	protein_coding	solute carrier family 5 (sodium-dependent vitamin transporter), member 6 [Source:MGI Symbol;Acc:MGI:2660847]	-
ENSMUSG00000057286	19.4754	15.0895	5.16109	18.2358	16.1622	15.9398	91.2839	72.0955	64.2296	50.5335	117.865	163.807	15.0106	93.3025	-2.62632	1.39623e-13	2.22726e-12	St6galnac2	11	116675303	116694868	-	5790	protein_coding	ST6 (alpha-N-acetyl-neuraminyl-2,3-beta-galactosyl-1,3)-N-acetylgalactosaminide alpha-2,6-sialyltransferase 2 [Source:MGI Symbol;Acc:MGI:107553]	-
ENSMUSG00000023991	1298.04	1513.98	1264.47	979.523	1082.87	1704.42	347.22	312.414	604.417	568.307	294.213	358.556	1307.22	414.188	1.65784	1.52916e-13	2.43763e-12	Foxp4	17	47867133	47924645	-	4926	protein_coding	forkhead box P4 [Source:MGI Symbol;Acc:MGI:1921373]	Fork
ENSMUSG00000031757	42.8459	56.3341	21.9346	39.0767	27.3515	66.0362	0	0	0	0.777438	1.79947	0	42.2632	0.429484	6.63846	1.55258e-13	2.47324e-12	Mt4	8	94137197	94139031	+	398	protein_coding	metallothionein 4 [Source:MGI Symbol;Acc:MGI:99692]	-
ENSMUSG00000000555	1712.86	1608.54	1010.28	1122.8	962.274	1387.9	575.003	488.361	520.425	601.737	573.13	542.384	1300.78	550.173	1.24213	1.5636e-13	2.48734e-12	Itga5	15	103344286	103366763	-	4933	protein_coding	integrin alpha 5 (fibronectin receptor alpha) [Source:MGI Symbol;Acc:MGI:96604]	-
ENSMUSG00000048355	11.6853	10.0597	23.2249	26.0512	2.4865	9.10844	76.7808	115.01	62.5827	75.4115	87.2741	80.0835	13.7693	82.857	-2.60693	1.56502e-13	2.48788e-12	Arxes1	X	136033367	136034946	+	1580	protein_coding	adipocyte-related X-chromosome expressed sequence 1 [Source:MGI Symbol;Acc:MGI:1923469]	-
ENSMUSG00000035878	24.3443	20.1193	7.74163	7.81535	9.94599	9.10844	87.8714	116.726	105.402	121.28	44.0869	60.0627	13.1792	89.2383	-2.73269	1.57271e-13	2.49837e-12	Hykk	9	54917283	54949924	+	8936	protein_coding	hydroxylysine kinase 1 [Source:MGI Symbol;Acc:MGI:2443139]	-
ENSMUSG00000052631	21.423	47.2804	24.5152	19.5384	38.5407	50.0964	4.2656	1.71656	4.94074	1.55488	1.79947	4.5502	33.5657	3.13791	3.42698	1.59443e-13	2.53111e-12	Sh2d6	6	72513644	72521634	-	1737	protein_coding	SH2 domain containing 6 [Source:MGI Symbol;Acc:MGI:1918380]	-
ENSMUSG00000037706	2261.1	2486.75	1981.86	2089.3	1830.06	2383	4083.89	4026.19	5718.09	5659.75	4029.9	3995.99	2172.01	4585.63	-1.07793	1.62766e-13	2.5803e-12	Cd81	7	143052739	143067934	+	2879	protein_coding	CD81 antigen [Source:MGI Symbol;Acc:MGI:1096398]	-
ENSMUSG00000039145	39.9246	54.3222	12.9027	18.2358	17.4055	61.482	196.218	327.863	267.624	335.076	133.161	171.998	34.0455	238.656	-2.79949	1.78371e-13	2.82378e-12	Camk1d	2	5293457	5714515	-	7427	protein_coding	calcium/calmodulin-dependent protein kinase ID [Source:MGI Symbol;Acc:MGI:2442190]	-
ENSMUSG00000054517	97.3772	118.704	86.4482	88.5739	101.946	70.5904	187.686	226.586	250.331	238.673	175.448	233.88	93.94	218.768	-1.21689	1.80943e-13	2.86253e-12	Trim65	11	116121846	116131128	-	5883	protein_coding	tripartite motif-containing 65 [Source:MGI Symbol;Acc:MGI:2442815]	-
ENSMUSG00000079484	96.4034	72.4296	107.093	175.845	152.92	71.729	25.5936	21.457	12.3519	27.2103	26.992	32.7614	112.737	24.3944	2.20685	1.81934e-13	2.87621e-12	Phyhd1	2	30266203	30282149	+	2657	protein_coding	phytanoyl-CoA dioxygenase domain containing 1 [Source:MGI Symbol;Acc:MGI:3612860]	-
ENSMUSG00000023132	142.171	128.764	68.3844	195.384	100.703	140.042	5.11872	3.43312	13.9988	4.66463	11.6965	34.5815	129.241	12.2489	3.40769	1.84755e-13	2.91881e-12	Gzma	13	113093825	113100981	-	1006	protein_coding	granzyme A [Source:MGI Symbol;Acc:MGI:109266]	-
ENSMUSG00000061887	264.866	298.772	267.086	323.034	343.137	368.892	779.752	767.303	1655.97	1857.3	864.644	863.628	310.965	1131.43	-1.86375	1.95201e-13	3.0817e-12	Ssbp3	4	106910701	107049694	+	6582	protein_coding	single-stranded DNA binding protein 3 [Source:MGI Symbol;Acc:MGI:1919725]	-
ENSMUSG00000097617	25.3181	24.1432	34.8373	39.0767	41.0272	18.2169	136.499	150.199	77.405	107.286	103.469	90.094	30.4366	110.825	-1.87613	1.99251e-13	3.14348e-12	Gm10687	9	44122186	44134485	-	3233	antisense	predicted gene 10687 [Source:MGI Symbol;Acc:MGI:3642689]	-
ENSMUSG00000087150	0.973772	7.04177	3.87082	0	1.24325	4.55422	26.4467	38.6226	41.9963	33.4298	24.2928	34.5815	2.9473	33.2283	-3.45756	2.0097e-13	3.16842e-12	BC064078	6	128992952	129008040	+	2547	transcribed_unprocessed_pseudogene	cDNA sequence BC064078 [Source:MGI Symbol;Acc:MGI:3040692]	-
ENSMUSG00000045573	461.568	735.362	344.503	253.999	348.11	774.218	1326.6	2112.23	2756.93	2282.56	1768.88	2117.66	486.293	2060.81	-2.08244	2.01912e-13	3.18086e-12	Penk	4	4133531	4138819	-	1634	protein_coding	preproenkephalin [Source:MGI Symbol;Acc:MGI:104629]	-
ENSMUSG00000034285	20.4492	23.1372	6.45136	18.2358	14.919	23.9097	79.3402	196.546	141.635	129.055	62.9813	68.253	17.8504	112.968	-2.65195	2.02036e-13	3.18086e-12	Nipsnap1	11	4873951	4894200	+	2649	protein_coding	nipsnap homolog 1 [Source:MGI Symbol;Acc:MGI:1278344]	-
ENSMUSG00000050627	645.611	515.055	436.112	500.182	571.894	436.067	1070.67	1119.2	1293.65	1536.22	1112.97	900.94	517.487	1172.27	-1.17923	2.02728e-13	3.18955e-12	Gpd1l	9	114899341	114933987	-	5077	protein_coding	glycerol-3-phosphate dehydrogenase 1-like [Source:MGI Symbol;Acc:MGI:1289257]	-
ENSMUSG00000114055	28.2394	13.0776	14.193	15.6307	12.4325	44.4037	0	0	0	0	0	0	21.3295	0	7.09191	2.08333e-13	3.2755e-12	Gm32089	13	94289448	94295006	-	1193	lincRNA	predicted gene, 32089 [Source:MGI Symbol;Acc:MGI:5591248]	-
ENSMUSG00000085395	2.92131	1.00597	0	1.30256	2.4865	5.69278	23.0342	28.3232	37.0556	45.8688	34.1899	23.661	2.23485	32.0221	-3.81563	2.16724e-13	3.40508e-12	Gm13056	4	141278439	141279794	+	564	lincRNA	predicted gene 13056 [Source:MGI Symbol;Acc:MGI:3650725]	-
ENSMUSG00000037362	1505.45	1801.69	1003.83	1276.51	946.112	1453.94	440.21	493.511	615.946	552.758	565.932	388.587	1331.25	509.491	1.38597	2.21054e-13	3.47074e-12	Nov	15	54745702	54754039	+	2869	protein_coding	nephroblastoma overexpressed gene [Source:MGI Symbol;Acc:MGI:109185]	-
ENSMUSG00000007659	1832.64	1631.68	1598.65	2575.16	1904.66	1763.62	579.269	648.86	849.808	1026.22	722.486	823.586	1884.4	775.038	1.28139	2.23535e-13	3.50729e-12	Bcl2l1	2	152780668	152831728	-	4586	protein_coding	BCL2-like 1 [Source:MGI Symbol;Acc:MGI:88139]	-
ENSMUSG00000024397	52.5837	77.4594	70.965	39.0767	33.5677	72.8675	155.268	192.255	282.446	261.997	149.356	242.071	57.7533	213.899	-1.88567	2.25438e-13	3.53474e-12	Aif1	17	35170991	35176068	-	1532	protein_coding	allograft inflammatory factor 1 [Source:MGI Symbol;Acc:MGI:1343098]	-
ENSMUSG00000024621	808.23	1142.78	434.822	599.177	368.002	869.856	2015.07	2781.69	3659.44	3800.12	2321.31	2659.14	703.811	2872.79	-2.02849	2.26915e-13	3.55547e-12	Csf1r	18	61105572	61132149	+	4885	protein_coding	colony stimulating factor 1 receptor [Source:MGI Symbol;Acc:MGI:1339758]	-
ENSMUSG00000057554	2527.91	3007.84	2095.4	1521.39	1699.52	3036.53	859.092	897.761	911.567	1023.89	797.164	836.327	2314.76	887.633	1.38304	2.28696e-13	3.58092e-12	Lgals8	13	12439415	12464944	-	3688	protein_coding	lectin, galactose binding, soluble 8 [Source:MGI Symbol;Acc:MGI:1928481]	-
ENSMUSG00000037376	719.617	719.266	498.045	574.428	598.003	837.977	273.852	279.799	288.21	291.539	293.313	376.757	657.889	300.578	1.1315	2.31027e-13	3.61495e-12	Trmt6	2	132804207	132816055	-	5384	protein_coding	tRNA methyltransferase 6 [Source:MGI Symbol;Acc:MGI:1914176]	-
ENSMUSG00000060063	88.6132	177.05	78.7066	96.3893	60.9192	144.597	266.173	377.643	489.133	413.597	402.181	523.273	107.712	412	-1.93201	2.32246e-13	3.63156e-12	Alox5ap	5	149264767	149288153	+	1420	protein_coding	arachidonate 5-lipoxygenase activating protein [Source:MGI Symbol;Acc:MGI:107505]	-
ENSMUSG00000039253	98.3509	84.5012	76.1261	66.4304	77.0814	125.241	181.715	208.562	227.274	253.445	205.139	206.579	87.9552	213.786	-1.27703	2.3353e-13	3.64914e-12	Fn3krp	11	121421401	121431288	+	2520	protein_coding	fructosamine 3 kinase related protein [Source:MGI Symbol;Acc:MGI:2679256]	-
ENSMUSG00000061536	97.3772	121.722	55.4817	69.0356	82.0544	67.1748	249.111	250.618	248.684	358.399	189.844	227.51	82.1409	254.028	-1.62296	2.38721e-13	3.72519e-12	Sec22c	9	121680045	121705490	-	6119	protein_coding	SEC22 homolog C, vesicle trafficking protein [Source:MGI Symbol;Acc:MGI:2447871]	-
[truncated: 3,963 more rows]

## Sheet: TAKvsLPS_deg_all
gene_id	TAK_1_P	TAK_2_P	TAK_3_P	TAK_4_P	TAK_5_P	TAK_6_P	LPS_1_P	LPS_2_P	LPS_3_P	LPS_4_P	LPS_5_P	LPS_6_P	TAK_P	LPS_P	log2FoldChange	pvalue	padj	gene_name	gene_chr	gene_start	gene_end	gene_strand	gene_length	gene_biotype	gene_description	tf_family
[truncated: 35 more rows]
